# Supplementary material for: Human influence on the distribution of cacao: insights from remote sensing and biogeography
Source: Springer Nature journal article supplement (doi:10.1007/s10531-023-02777-7), 2024-02-10
Supplement: MOESM1 [file 26722336]

Archive with 3,988 entries (3,988 files):
- Supplementary/README.txt
- Supplementary/AppendixS1 - Datasets/T_cacao_empirical_occs.txt
- Supplementary/AppendixS1 - Datasets/Theobroma_wild_relatives_occs.txt
- Supplementary/AppendixS2 - Kstests/AppendixS2-C.xlsx
- Supplementary/AppendixS2 - Kstests/AppendixS2-A.xlsx
- Supplementary/AppendixS2 - Kstests/AppendixS2-D.xlsx
- Supplementary/AppendixS1 - Datasets/1000_replicates/rep_occs_923.txt
- Supplementary/AppendixS1 - Datasets/1000_replicates/rep_occs_855.txt
- Supplementary/AppendixS1 - Datasets/1000_replicates/rep_occs_809.txt
- Supplementary/AppendixS1 - Datasets/1000_replicates/rep_occs_844.txt
- Supplementary/AppendixS1 - Datasets/1000_replicates/rep_occs_842.txt
- Supplementary/AppendixS1 - Datasets/1000_replicates/rep_occs_941.txt
- Supplementary/AppendixS1 - Datasets/1000_replicates/rep_occs_827.txt
- Supplementary/AppendixS1 - Datasets/1000_replicates/rep_occs_841.txt
- Supplementary/AppendixS1 - Datasets/1000_replicates/rep_occs_920.txt
- Supplementary/AppendixS1 - Datasets/1000_replicates/rep_occs_873.txt
- Supplementary/AppendixS1 - Datasets/1000_replicates/rep_occs_901.txt
- Supplementary/AppendixS1 - Datasets/1000_replicates/rep_occs_845.txt
- Supplementary/AppendixS1 - Datasets/1000_replicates/rep_occs_853.txt
- Supplementary/AppendixS1 - Datasets/1000_replicates/rep_occs_967.txt
- Supplementary/AppendixS1 - Datasets/1000_replicates/rep_occs_961.txt
- Supplementary/AppendixS1 - Datasets/1000_replicates/rep_occs_857.txt
- Supplementary/AppendixS1 - Datasets/1000_replicates/rep_occs_975.txt
- Supplementary/AppendixS1 - Datasets/1000_replicates/rep_occs_935.txt
- Supplementary/AppendixS1 - Datasets/1000_replicates/rep_occs_864.txt
- Supplementary/AppendixS1 - Datasets/1000_replicates/rep_occs_835.txt
- Supplementary/AppendixS1 - Datasets/1000_replicates/rep_occs_869.txt
- Supplementary/AppendixS1 - Datasets/1000_replicates/rep_occs_810.txt
- Supplementary/AppendixS1 - Datasets/1000_replicates/rep_occs_914.txt
- Supplementary/AppendixS1 - Datasets/1000_replicates/rep_occs_915.txt
- Supplementary/AppendixS1 - Datasets/1000_replicates/rep_occs_936.txt
- Supplementary/AppendixS1 - Datasets/1000_replicates/rep_occs_930.txt
- Supplementary/AppendixS1 - Datasets/1000_replicates/rep_occs_893.txt
- Supplementary/AppendixS1 - Datasets/1000_replicates/rep_occs_814.txt
- Supplementary/AppendixS1 - Datasets/1000_replicates/rep_occs_927.txt
- Supplementary/AppendixS1 - Datasets/1000_replicates/rep_occs_909.txt
- Supplementary/AppendixS1 - Datasets/1000_replicates/rep_occs_892.txt
- Supplementary/AppendixS1 - Datasets/1000_replicates/rep_occs_954.txt
- Supplementary/AppendixS1 - Datasets/1000_replicates/rep_occs_830.txt
- Supplementary/AppendixS1 - Datasets/1000_replicates/rep_occs_945.txt
- Supplementary/AppendixS1 - Datasets/1000_replicates/rep_occs_906.txt
- Supplementary/AppendixS1 - Datasets/1000_replicates/rep_occs_924.txt
- Supplementary/AppendixS1 - Datasets/1000_replicates/rep_occs_938.txt
- Supplementary/AppendixS1 - Datasets/1000_replicates/rep_occs_903.txt
- Supplementary/AppendixS1 - Datasets/1000_replicates/rep_occs_968.txt
- Supplementary/AppendixS1 - Datasets/1000_replicates/rep_occs_881.txt
- Supplementary/AppendixS1 - Datasets/1000_replicates/rep_occs_885.txt
- Supplementary/AppendixS1 - Datasets/1000_replicates/rep_occs_846.txt
- Supplementary/AppendixS1 - Datasets/1000_replicates/rep_occs_824.txt
- Supplementary/AppendixS1 - Datasets/1000_replicates/rep_occs_959.txt
- Supplementary/AppendixS1 - Datasets/1000_replicates/rep_occs_826.txt
- Supplementary/AppendixS1 - Datasets/1000_replicates/rep_occs_942.txt
- Supplementary/AppendixS1 - Datasets/1000_replicates/rep_occs_839.txt
- Supplementary/AppendixS1 - Datasets/1000_replicates/rep_occs_887.txt
- Supplementary/AppendixS1 - Datasets/1000_replicates/rep_occs_813.txt
- Supplementary/AppendixS1 - Datasets/1000_replicates/rep_occs_910.txt
- Supplementary/AppendixS1 - Datasets/1000_replicates/rep_occs_976.txt
- Supplementary/AppendixS1 - Datasets/1000_replicates/rep_occs_974.txt
- Supplementary/AppendixS1 - Datasets/1000_replicates/rep_occs_971.txt
- Supplementary/AppendixS1 - Datasets/1000_replicates/rep_occs_871.txt
- Supplementary/AppendixS1 - Datasets/1000_replicates/rep_occs_812.txt
- Supplementary/AppendixS1 - Datasets/1000_replicates/rep_occs_913.txt
- Supplementary/AppendixS1 - Datasets/1000_replicates/rep_occs_811.txt
- Supplementary/AppendixS1 - Datasets/1000_replicates/rep_occs_823.txt
- Supplementary/AppendixS1 - Datasets/1000_replicates/rep_occs_926.txt
- Supplementary/AppendixS1 - Datasets/1000_replicates/rep_occs_872.txt
- Supplementary/AppendixS1 - Datasets/1000_replicates/rep_occs_882.txt
- Supplementary/AppendixS1 - Datasets/1000_replicates/rep_occs_849.txt
- Supplementary/AppendixS1 - Datasets/1000_replicates/rep_occs_982.txt
- Supplementary/AppendixS1 - Datasets/1000_replicates/rep_occs_956.txt
- Supplementary/AppendixS1 - Datasets/1000_replicates/rep_occs_937.txt
- Supplementary/AppendixS1 - Datasets/1000_replicates/rep_occs_880.txt
- Supplementary/AppendixS1 - Datasets/1000_replicates/rep_occs_832.txt
- Supplementary/AppendixS1 - Datasets/1000_replicates/rep_occs_829.txt
- Supplementary/AppendixS1 - Datasets/1000_replicates/rep_occs_981.txt
- Supplementary/AppendixS1 - Datasets/1000_replicates/rep_occs_977.txt
- Supplementary/AppendixS1 - Datasets/1000_replicates/rep_occs_951.txt
- Supplementary/AppendixS1 - Datasets/1000_replicates/rep_occs_858.txt
- Supplementary/AppendixS1 - Datasets/1000_replicates/rep_occs_818.txt
- Supplementary/AppendixS1 - Datasets/1000_replicates/rep_occs_947.txt
- Supplementary/AppendixS1 - Datasets/1000_replicates/rep_occs_911.txt
- Supplementary/AppendixS1 - Datasets/1000_replicates/rep_occs_828.txt
- Supplementary/AppendixS1 - Datasets/1000_replicates/rep_occs_929.txt
- Supplementary/AppendixS1 - Datasets/1000_replicates/rep_occs_931.txt
- Supplementary/AppendixS1 - Datasets/1000_replicates/rep_occs_837.txt
- Supplementary/AppendixS1 - Datasets/1000_replicates/rep_occs_899.txt
- Supplementary/AppendixS1 - Datasets/1000_replicates/rep_occs_917.txt
- Supplementary/AppendixS1 - Datasets/1000_replicates/rep_occs_963.txt
- Supplementary/AppendixS1 - Datasets/1000_replicates/rep_occs_949.txt
- Supplementary/AppendixS1 - Datasets/1000_replicates/rep_occs_883.txt
- Supplementary/AppendixS1 - Datasets/1000_replicates/rep_occs_980.txt
- Supplementary/AppendixS1 - Datasets/1000_replicates/rep_occs_933.txt
- Supplementary/AppendixS1 - Datasets/1000_replicates/rep_occs_820.txt
- Supplementary/AppendixS1 - Datasets/1000_replicates/rep_occs_900.txt
- Supplementary/AppendixS1 - Datasets/1000_replicates/rep_occs_847.txt
- Supplementary/AppendixS1 - Datasets/1000_replicates/rep_occs_859.txt
- Supplementary/AppendixS1 - Datasets/1000_replicates/rep_occs_972.txt
- Supplementary/AppendixS1 - Datasets/1000_replicates/rep_occs_879.txt
- Supplementary/AppendixS1 - Datasets/1000_replicates/rep_occs_962.txt
- Supplementary/AppendixS1 - Datasets/1000_replicates/rep_occs_816.txt
- Supplementary/AppendixS1 - Datasets/1000_replicates/rep_occs_833.txt
- Supplementary/AppendixS1 - Datasets/1000_replicates/rep_occs_944.txt
- Supplementary/AppendixS1 - Datasets/1000_replicates/rep_occs_948.txt
- Supplementary/AppendixS1 - Datasets/1000_replicates/rep_occs_890.txt
- Supplementary/AppendixS1 - Datasets/1000_replicates/rep_occs_928.txt
- Supplementary/AppendixS1 - Datasets/1000_replicates/rep_occs_939.txt
- Supplementary/AppendixS1 - Datasets/1000_replicates/rep_occs_861.txt
- Supplementary/AppendixS1 - Datasets/1000_replicates/rep_occs_896.txt
- Supplementary/AppendixS1 - Datasets/1000_replicates/rep_occs_950.txt
- Supplementary/AppendixS1 - Datasets/1000_replicates/rep_occs_874.txt
- Supplementary/AppendixS1 - Datasets/1000_replicates/rep_occs_870.txt
- Supplementary/AppendixS1 - Datasets/1000_replicates/rep_occs_966.txt
- Supplementary/AppendixS1 - Datasets/1000_replicates/rep_occs_960.txt
- Supplementary/AppendixS1 - Datasets/1000_replicates/rep_occs_973.txt
- Supplementary/AppendixS1 - Datasets/1000_replicates/rep_occs_822.txt
- Supplementary/AppendixS1 - Datasets/1000_replicates/rep_occs_888.txt
- Supplementary/AppendixS1 - Datasets/1000_replicates/rep_occs_925.txt
- Supplementary/AppendixS1 - Datasets/1000_replicates/rep_occs_876.txt
- Supplementary/AppendixS1 - Datasets/1000_replicates/rep_occs_808.txt
- Supplementary/AppendixS1 - Datasets/1000_replicates/rep_occs_979.txt
- Supplementary/AppendixS1 - Datasets/1000_replicates/rep_occs_891.txt
- Supplementary/AppendixS1 - Datasets/1000_replicates/rep_occs_907.txt
- Supplementary/AppendixS1 - Datasets/1000_replicates/rep_occs_889.txt
- Supplementary/AppendixS1 - Datasets/1000_replicates/rep_occs_921.txt
- Supplementary/AppendixS1 - Datasets/1000_replicates/rep_occs_834.txt
- Supplementary/AppendixS1 - Datasets/1000_replicates/rep_occs_958.txt
- Supplementary/AppendixS1 - Datasets/1000_replicates/rep_occs_919.txt
- Supplementary/AppendixS1 - Datasets/1000_replicates/rep_occs_825.txt
- Supplementary/AppendixS1 - Datasets/1000_replicates/rep_occs_862.txt
- Supplementary/AppendixS1 - Datasets/1000_replicates/rep_occs_898.txt
- Supplementary/AppendixS1 - Datasets/1000_replicates/rep_occs_854.txt
- Supplementary/AppendixS1 - Datasets/1000_replicates/rep_occs_970.txt
- Supplementary/AppendixS1 - Datasets/1000_replicates/rep_occs_838.txt
- Supplementary/AppendixS1 - Datasets/1000_replicates/rep_occs_943.txt
- Supplementary/AppendixS1 - Datasets/1000_replicates/rep_occs_978.txt
- Supplementary/AppendixS1 - Datasets/1000_replicates/rep_occs_895.txt
- Supplementary/AppendixS1 - Datasets/1000_replicates/rep_occs_955.txt
- Supplementary/AppendixS1 - Datasets/1000_replicates/rep_occs_821.txt
- Supplementary/AppendixS1 - Datasets/1000_replicates/rep_occs_940.txt
- Supplementary/AppendixS1 - Datasets/1000_replicates/rep_occs_863.txt
- Supplementary/AppendixS1 - Datasets/1000_replicates/rep_occs_851.txt
- Supplementary/AppendixS1 - Datasets/1000_replicates/rep_occs_894.txt
- Supplementary/AppendixS1 - Datasets/1000_replicates/rep_occs_815.txt
- Supplementary/AppendixS1 - Datasets/1000_replicates/rep_occs_908.txt
- Supplementary/AppendixS1 - Datasets/1000_replicates/rep_occs_817.txt
- Supplementary/AppendixS1 - Datasets/1000_replicates/rep_occs_934.txt
- Supplementary/AppendixS1 - Datasets/1000_replicates/rep_occs_850.txt
- Supplementary/AppendixS1 - Datasets/1000_replicates/rep_occs_875.txt
- Supplementary/AppendixS1 - Datasets/1000_replicates/rep_occs_946.txt
- Supplementary/AppendixS1 - Datasets/1000_replicates/rep_occs_819.txt
- Supplementary/AppendixS1 - Datasets/1000_replicates/rep_occs_916.txt
- Supplementary/AppendixS1 - Datasets/1000_replicates/rep_occs_969.txt
- Supplementary/AppendixS1 - Datasets/1000_replicates/rep_occs_932.txt
- Supplementary/AppendixS1 - Datasets/1000_replicates/rep_occs_860.txt
- Supplementary/AppendixS1 - Datasets/1000_replicates/rep_occs_848.txt
- Supplementary/AppendixS1 - Datasets/1000_replicates/rep_occs_897.txt
- Supplementary/AppendixS1 - Datasets/1000_replicates/rep_occs_884.txt
- Supplementary/AppendixS1 - Datasets/1000_replicates/rep_occs_905.txt
- Supplementary/AppendixS1 - Datasets/1000_replicates/rep_occs_886.txt
- Supplementary/AppendixS1 - Datasets/1000_replicates/rep_occs_843.txt
- Supplementary/AppendixS1 - Datasets/1000_replicates/rep_occs_223.txt
- Supplementary/AppendixS1 - Datasets/1000_replicates/rep_occs_918.txt
- Supplementary/AppendixS1 - Datasets/1000_replicates/rep_occs_867.txt
- Supplementary/AppendixS1 - Datasets/1000_replicates/rep_occs_877.txt
- Supplementary/AppendixS1 - Datasets/1000_replicates/rep_occs_840.txt
- Supplementary/AppendixS1 - Datasets/1000_replicates/rep_occs_831.txt
- Supplementary/AppendixS1 - Datasets/1000_replicates/rep_occs_856.txt
- Supplementary/AppendixS1 - Datasets/1000_replicates/rep_occs_957.txt
- Supplementary/AppendixS1 - Datasets/1000_replicates/rep_occs_953.txt
- Supplementary/AppendixS1 - Datasets/1000_replicates/rep_occs_912.txt
- Supplementary/AppendixS1 - Datasets/1000_replicates/rep_occs_964.txt
- Supplementary/AppendixS1 - Datasets/1000_replicates/rep_occs_836.txt
- Supplementary/AppendixS1 - Datasets/1000_replicates/rep_occs_952.txt
- Supplementary/AppendixS1 - Datasets/1000_replicates/rep_occs_866.txt
- Supplementary/AppendixS1 - Datasets/1000_replicates/rep_occs_852.txt
- Supplementary/AppendixS1 - Datasets/1000_replicates/rep_occs_865.txt
- Supplementary/AppendixS1 - Datasets/1000_replicates/rep_occs_904.txt
- Supplementary/AppendixS1 - Datasets/1000_replicates/rep_occs_965.txt
- Supplementary/AppendixS1 - Datasets/1000_replicates/rep_occs_922.txt
- Supplementary/AppendixS1 - Datasets/1000_replicates/rep_occs_456.txt
- Supplementary/AppendixS1 - Datasets/1000_replicates/rep_occs_417.txt
- Supplementary/AppendixS1 - Datasets/1000_replicates/rep_occs_789.txt
- Supplementary/AppendixS1 - Datasets/1000_replicates/rep_occs_764.txt
- Supplementary/AppendixS1 - Datasets/1000_replicates/rep_occs_105.txt
- Supplementary/AppendixS1 - Datasets/1000_replicates/rep_occs_585.txt
- Supplementary/AppendixS1 - Datasets/1000_replicates/rep_occs_396.txt
- Supplementary/AppendixS1 - Datasets/1000_replicates/rep_occs_490.txt
- Supplementary/AppendixS1 - Datasets/1000_replicates/rep_occs_672.txt
- Supplementary/AppendixS1 - Datasets/1000_replicates/rep_occs_483.txt
- Supplementary/AppendixS1 - Datasets/1000_replicates/rep_occs_902.txt
- Supplementary/AppendixS1 - Datasets/1000_replicates/rep_occs_759.txt
- Supplementary/AppendixS1 - Datasets/1000_replicates/rep_occs_868.txt
- Supplementary/AppendixS1 - Datasets/1000_replicates/rep_occs_272.txt
- Supplementary/AppendixS1 - Datasets/1000_replicates/rep_occs_226.txt
- Supplementary/AppendixS1 - Datasets/1000_replicates/rep_occs_421.txt
- Supplementary/AppendixS1 - Datasets/1000_replicates/rep_occs_618.txt
- Supplementary/AppendixS1 - Datasets/1000_replicates/rep_occs_578.txt
- Supplementary/AppendixS1 - Datasets/1000_replicates/rep_occs_624.txt
- Supplementary/AppendixS1 - Datasets/1000_replicates/rep_occs_248.txt
- Supplementary/AppendixS1 - Datasets/1000_replicates/rep_occs_242.txt
- Supplementary/AppendixS1 - Datasets/1000_replicates/rep_occs_521.txt
- Supplementary/AppendixS1 - Datasets/1000_replicates/rep_occs_592.txt
- Supplementary/AppendixS1 - Datasets/1000_replicates/rep_occs_430.txt
- Supplementary/AppendixS1 - Datasets/1000_replicates/rep_occs_584.txt
- Supplementary/AppendixS1 - Datasets/1000_replicates/rep_occs_95.txt
- Supplementary/AppendixS1 - Datasets/1000_replicates/rep_occs_671.txt
- Supplementary/AppendixS1 - Datasets/1000_replicates/rep_occs_440.txt
- Supplementary/AppendixS2 - Kstests/ApprendixS2-B/replicas_FreqForest_999.txt
- Supplementary/AppendixS1 - Datasets/1000_replicates/rep_occs_144.txt
- Supplementary/AppendixS2 - Kstests/ApprendixS2-B/replicas_medianNDVI_13.txt
- Supplementary/AppendixS1 - Datasets/1000_replicates/rep_occs_878.txt
- Supplementary/AppendixS1 - Datasets/1000_replicates/rep_occs_474.txt
- Supplementary/AppendixS2 - Kstests/ApprendixS2-B/replicas_medianNDVI_5.txt
- Supplementary/AppendixS2 - Kstests/ApprendixS2-B/replicas_medianNDVI_2.txt
- Supplementary/AppendixS1 - Datasets/1000_replicates/rep_occs_19.txt
- Supplementary/AppendixS1 - Datasets/1000_replicates/rep_occs_85.txt
- Supplementary/AppendixS1 - Datasets/1000_replicates/rep_occs_794.txt
- Supplementary/AppendixS1 - Datasets/1000_replicates/rep_occs_628.txt
- Supplementary/AppendixS1 - Datasets/1000_replicates/rep_occs_324.txt
- Supplementary/AppendixS1 - Datasets/1000_replicates/rep_occs_104.txt
- Supplementary/AppendixS2 - Kstests/ApprendixS2-B/replicas_medianNDVI_6.txt
- Supplementary/AppendixS1 - Datasets/1000_replicates/rep_occs_416.txt
- Supplementary/AppendixS1 - Datasets/1000_replicates/rep_occs_190.txt
- Supplementary/AppendixS1 - Datasets/1000_replicates/rep_occs_465.txt
- Supplementary/AppendixS2 - Kstests/ApprendixS2-B/replicas_medianNDVI_3.txt
- Supplementary/AppendixS2 - Kstests/ApprendixS2-B/replicas_medianNDVI_1.txt
- Supplementary/AppendixS2 - Kstests/ApprendixS2-B/replicas_medianNDVI_7.txt
- Supplementary/AppendixS1 - Datasets/1000_replicates/rep_occs_998.txt
- Supplementary/AppendixS1 - Datasets/1000_replicates/rep_occs_139.txt
- Supplementary/AppendixS2 - Kstests/ApprendixS2-B/replicas_medianNDVI_8.txt
- Supplementary/AppendixS1 - Datasets/1000_replicates/rep_occs_656.txt
- Supplementary/AppendixS1 - Datasets/1000_replicates/rep_occs_568.txt
- Supplementary/AppendixS1 - Datasets/1000_replicates/rep_occs_663.txt
- Supplementary/AppendixS1 - Datasets/1000_replicates/rep_occs_767.txt
- Supplementary/AppendixS1 - Datasets/1000_replicates/rep_occs_598.txt
- Supplementary/AppendixS1 - Datasets/1000_replicates/rep_occs_518.txt
- Supplementary/AppendixS2 - Kstests/ApprendixS2-B/replicas_medianNDVI_4.txt
- Supplementary/AppendixS1 - Datasets/1000_replicates/rep_occs_707.txt
- Supplementary/AppendixS2 - Kstests/ApprendixS2-B/replicas_medianNDVI_10.txt
- Supplementary/AppendixS2 - Kstests/ApprendixS2-B/replicas_medianNDVI_11.txt
- Supplementary/AppendixS1 - Datasets/1000_replicates/rep_occs_503.txt
- Supplementary/AppendixS1 - Datasets/1000_replicates/rep_occs_558.txt
- Supplementary/AppendixS1 - Datasets/1000_replicates/rep_occs_384.txt
- Supplementary/AppendixS1 - Datasets/1000_replicates/rep_occs_168.txt
- Supplementary/AppendixS2 - Kstests/ApprendixS2-B/replicas_medianNDVI_12.txt
- Supplementary/AppendixS1 - Datasets/1000_replicates/rep_occs_434.txt
- Supplementary/AppendixS2 - Kstests/ApprendixS2-B/replicas_medianNDVI_47.txt
- Supplementary/AppendixS2 - Kstests/ApprendixS2-B/replicas_medianNDVI_15.txt
- Supplementary/AppendixS2 - Kstests/ApprendixS2-B/replicas_medianNDVI_29.txt
- Supplementary/AppendixS1 - Datasets/1000_replicates/rep_occs_411.txt
- Supplementary/AppendixS2 - Kstests/ApprendixS2-B/replicas_FreqForest_1000.txt
- Supplementary/AppendixS2 - Kstests/ApprendixS2-B/replicas_medianNDVI_14.txt
- Supplementary/AppendixS2 - Kstests/ApprendixS2-B/replicas_medianNDVI_17.txt
- Supplementary/AppendixS2 - Kstests/ApprendixS2-B/replicas_medianNDVI_24.txt
- Supplementary/AppendixS1 - Datasets/1000_replicates/rep_occs_79.txt
- Supplementary/AppendixS2 - Kstests/ApprendixS2-B/replicas_medianNDVI_16.txt
- Supplementary/AppendixS1 - Datasets/1000_replicates/rep_occs_501.txt
- Supplementary/AppendixS1 - Datasets/1000_replicates/rep_occs_431.txt
- Supplementary/AppendixS1 - Datasets/1000_replicates/rep_occs_161.txt
- Supplementary/AppendixS2 - Kstests/ApprendixS2-B/replicas_medianNDVI_22.txt
- Supplementary/AppendixS2 - Kstests/ApprendixS2-B/replicas_medianNDVI_18.txt
- Supplementary/AppendixS2 - Kstests/ApprendixS2-B/replicas_medianNDVI_19.txt
- Supplementary/AppendixS1 - Datasets/1000_replicates/rep_occs_382.txt
- Supplementary/AppendixS1 - Datasets/1000_replicates/rep_occs_70.txt
- Supplementary/AppendixS2 - Kstests/ApprendixS2-B/replicas_medianNDVI_20.txt
- Supplementary/AppendixS1 - Datasets/1000_replicates/rep_occs_777.txt
- Supplementary/AppendixS2 - Kstests/ApprendixS2-B/replicas_medianNDVI_23.txt
- Supplementary/AppendixS2 - Kstests/ApprendixS2-B/replicas_medianNDVI_26.txt
- Supplementary/AppendixS2 - Kstests/ApprendixS2-B/replicas_medianNDVI_31.txt
- Supplementary/AppendixS2 - Kstests/ApprendixS2-B/replicas_medianNDVI_21.txt
- Supplementary/AppendixS2 - Kstests/ApprendixS2-B/replicas_medianNDVI_30.txt
- Supplementary/AppendixS1 - Datasets/1000_replicates/rep_occs_666.txt
- Supplementary/AppendixS1 - Datasets/1000_replicates/rep_occs_224.txt
- Supplementary/AppendixS2 - Kstests/ApprendixS2-B/replicas_medianNDVI_27.txt
- Supplementary/AppendixS1 - Datasets/1000_replicates/rep_occs_677.txt
- Supplementary/AppendixS2 - Kstests/ApprendixS2-B/replicas_medianNDVI_44.txt
- Supplementary/AppendixS1 - Datasets/1000_replicates/rep_occs_209.txt
- Supplementary/AppendixS1 - Datasets/1000_replicates/rep_occs_303.txt
- Supplementary/AppendixS2 - Kstests/ApprendixS2-B/replicas_medianNDVI_25.txt
- Supplementary/AppendixS1 - Datasets/1000_replicates/rep_occs_316.txt
- Supplementary/AppendixS2 - Kstests/ApprendixS2-B/replicas_medianNDVI_40.txt
- Supplementary/AppendixS2 - Kstests/ApprendixS2-B/replicas_medianNDVI_60.txt
- Supplementary/AppendixS2 - Kstests/ApprendixS2-B/replicas_medianNDVI_35.txt
- Supplementary/AppendixS1 - Datasets/1000_replicates/rep_occs_749.txt
- Supplementary/AppendixS2 - Kstests/ApprendixS2-B/replicas_medianNDVI_33.txt
- Supplementary/AppendixS2 - Kstests/ApprendixS2-B/replicas_medianNDVI_34.txt
- Supplementary/AppendixS2 - Kstests/ApprendixS2-B/replicas_medianNDVI_36.txt
- Supplementary/AppendixS1 - Datasets/1000_replicates/rep_occs_532.txt
- Supplementary/AppendixS2 - Kstests/ApprendixS2-B/replicas_medianNDVI_42.txt
- Supplementary/AppendixS1 - Datasets/1000_replicates/rep_occs_535.txt
- Supplementary/AppendixS2 - Kstests/ApprendixS2-B/replicas_medianNDVI_9.txt
- Supplementary/AppendixS2 - Kstests/ApprendixS2-B/replicas_medianNDVI_48.txt
- Supplementary/AppendixS2 - Kstests/ApprendixS2-B/replicas_medianNDVI_37.txt
- Supplementary/AppendixS2 - Kstests/ApprendixS2-B/replicas_medianNDVI_41.txt
- Supplementary/AppendixS2 - Kstests/ApprendixS2-B/replicas_medianNDVI_46.txt
- Supplementary/AppendixS2 - Kstests/ApprendixS2-B/replicas_medianNDVI_39.txt
- Supplementary/AppendixS2 - Kstests/ApprendixS2-B/replicas_medianNDVI_43.txt
- Supplementary/AppendixS2 - Kstests/ApprendixS2-B/replicas_medianNDVI_49.txt
- Supplementary/AppendixS2 - Kstests/ApprendixS2-B/replicas_medianNDVI_62.txt
- Supplementary/AppendixS2 - Kstests/ApprendixS2-B/replicas_medianNDVI_38.txt
[truncated: 3,688 more entries]
