# Supplementary material for: Human influence on the distribution of cacao: insights from remote sensing and biogeography
Source: Springer Nature journal article supplement (doi:10.1007/s10531-023-02777-7), 2024-02-10
Supplement: MOESM1 [file 26722336 › Supplementary/AppendixS1 - Datasets/T_cacao_empirical_occs.txt]

INTERNAL.ID	source	basisOfRecord	institutionCode	gbifID	taxonRank	genus	specificEpithet	name.in.label..if.variant	scientific.name..current.determ.	collector	collectornumber	dateofcollection	decimallatitude	decimallongitude	Elected.gbifID.for.image.examined	Last.checked.in.insert.date	day	month	year	Freq_NDVI_Water	Freq_NDVI_Built.up	Freq_NDVI_Barren_Lands	Freq_NDVI_Shrubs_Grasslands	Freq_NDVI_Sparse_Vegetation	Freq_NDVI_Forests	mean_NDVI	median_NDVI	stdev_NDVI	path	row	MinorArea	MajorArea	CodeArea	Freq_NDVI_Water	Freq_NDVI_Built.up	Freq_NDVI_Barren_Lands	Freq_NDVI_Shrubs_Grasslands	Freq_NDVI_Sparse_Vegetation	Freq_NDVI_Forests	Freq_NDVI_Disturbed
1	GBIF	PRESERVED_SPECIMEN	WAG	2626711358	SPECIES	Theobroma	cacao		Theobroma cacao L.	Essou, J. & Adomou, A.C.	s.n	09/09/98	6.716667	2.133333	2626711358	44204	9	9	1998	75585	0	5192	30332	365570	156235	0.450128601	0.497766092	0.207313332	192	55	Africa	Unequivocal late introduction	D	0.119423808	0	0.008203326	0.047924363	0.57759822	0.246850283	0.056127689
2	GBIF	PRESERVED_SPECIMEN	U	2515572454	SPECIES	Theobroma	cacao		Theobroma cacao L.	Oldeman, R.A.A.	995	09/09/75	2.2573513	-52.8735632	1321531077	44210	9	9	1975	15418	0	7832	25717	76900	1079736	0.799799081	0.864575922	0.16857956	0	58	Guianan Lowlands province	Potential early introduction	N	0.012788621	0	0.006496334	0.021331234	0.063785508	0.895598302	0.027827568
3	GBIF	PRESERVED_SPECIMEN	MO	1260061609	SPECIES	Theobroma	cacao		Theobroma cacao L.	Gentle, P.H.	1740	09/09/35	17.3825	-88.44138	1260061609	44169	9	9	1935	323042	0	14345	49049	217665	424029	0.388868378	0.494174123	0.41021799	0	48	Mesoamerica	Unequivocal early introduction	T	0.314203457	0	0.013952516	0.047707002	0.211709609	0.412427417	0.061659518
4	GBIF	PRESERVED_SPECIMEN	A	1998965572	SPECIES	Theobroma	cacao		Theobroma cacao L.	Tsugaru, S. & Sano, Y.	B-834	09/08/87	-3.1190275	-60.0217314	1928084845	44217	9	8	1987	152113	0	9983	27965	95764	796175	0.615719998	0.799432695	0.378651822	231	62	Imerí province	Potential early introduction	L	0.140585028	0	0.009226433	0.025845656	0.08850647	0.735836414	0.035072089
5	GBIF	PRESERVED_SPECIMEN	HST	2452738358	SPECIES	Theobroma	cacao		Theobroma cacao L.	Silva, L.R.	77	09/07/04	-8.03969902	-34.93407959	0	44215	9	7	2004	149886	0	8492	36351	218667	792196	0.577496698	0.701021641	0.345803999	214	65	South American Atlantic coast	Unequivocal late introduction	G	0.124325643	0	0.007043842	0.030151992	0.181377282	0.657101242	0.037195834
6	GBIF	PRESERVED_SPECIMEN	CESJ	1077258490	SPECIES	Theobroma	cacao		Theobroma cacao L.	Krieger, L. & Camara, U.C.	s.n.	09/07/72	-4.468380629	-65.52935009	0	44216	9	7	1972	14758	0	3667	10669	28313	517844	0.77078057	0.83621335	0.173578028	1	63	Madeira province	Potential early introduction	J	0.025654888	0	0.006374609	0.018546687	0.049218515	0.900205302	0.024921295
7	GBIF	PRESERVED_SPECIMEN	NY	1930832251	SPECIES	Theobroma	cacao		Theobroma cacao L.	Atha, D.E.	1311	09/06/96	15.98542	-89.105536	0	44246	9	6	1996	109566	0	1450	7034	221082	866303	0.631629512	0.713862538	0.246677162	19	49	Mesoamerica	Unequivocal early introduction	T	0.090893329	0	0.001202885	0.005835238	0.183404331	0.718664217	0.007038123
9	GBIF	PRESERVED_SPECIMEN	L	2517245741	SPECIES	Theobroma	cacao		Theobroma cacao L.	Barbon, E.B.; et al.	1676	09/05/91	8.7799188	125.5110513	2517245741	44208	9	5	1991	83047	0	7699	30948	157356	925559	0.706340011	0.832921386	0.26022506	112	54	Asia	Unequivocal late introduction	E	0.068941042	0	0.006391285	0.025691324	0.130628279	0.76834807	0.032082609
10	GBIF	PRESERVED_SPECIMEN	NY	1928851268	VARIETY	Theobroma	cacao		Theobroma cacao var. leiocarpum (Bernoulli) Cif.	Fr√≥es, R.L.	20882	09/05/45	-4.3759905	-70.0301629	1928851268	44251	9	5	1945	52290	0	8608	29641	105817	608931	0.689182291	0.8391155	0.292874337	4	63	Madeira province	Potential early introduction	J	0.064933372	0	0.010689357	0.036807995	0.131402841	0.756166435	0.047497352
12	GBIF	PRESERVED_SPECIMEN	CIJH	97104859	SPECIES	Theobroma	cacao		Theobroma cacao L.	Peters, C.	s.n.	09/03/85	-6.0693619	-74.25476431	0	44228	9	3	1985	39261	0	2657	10656	51834	1101150	0.769212579	0.839868188	0.199504094	6	64	Ucayali province	Potential native area	V	0.032566662	0	0.002203959	0.00883906	0.042995858	0.913394461	0.011043019
13	GBIF	PRESERVED_SPECIMEN	FMB	1707579270	SPECIES	Theobroma	cacao		Theobroma cacao L.	Prieto, A.; et al.	3061	09/02/05	-3.719444	-70.307222	1707579270	44259	9	2	2005	45405	0	6479	20991	72181	650100	0.692628188	0.798938602	0.245448333	4	63	Imerí province	Potential early introduction	L	0.057102003	0	0.008148087	0.026398593	0.090775898	0.817575419	0.03454668
14	GBIF	PRESERVED_SPECIMEN	FMB	1707579035	SPECIES	Theobroma	cacao		Theobroma cacao L.	Prieto, A.; et al.	3251	09/02/05	3.719444	-70.307222	1707579035	44259	9	2	2005	23704	0	12733	45915	340070	783181	0.679975018	0.825653791	0.228383782	5	57	Imerí province	Potential early introduction	L	0.01966153	0	0.01056152	0.038084676	0.282074613	0.64961766	0.048646196
15	GBIF	PRESERVED_SPECIMEN	XAL	2629481756	SPECIES	Theobroma	cacao		Theobroma cacao L.	Solheim, S.L. & Reisfield, S.A.	s.n.	09/02/84	18.15	-96.583333	0	44204	9	2	1984	134709	0	19896	104408	332484	614001	0.534952506	0.608795375	0.282529702	24	47	Mesoamerica	Unequivocal early introduction	T	0.111745519	0	0.016504382	0.086609849	0.275806347	0.509333902	0.103114232
18	GBIF	PRESERVED_SPECIMEN	US	1322473427	SPECIES	Theobroma	cacao		Theobroma cacao L.	Steyermark, J.A.	54947	09/12/43	10.4600937	-67.7690497	1322473427	44235	9	12	1943	532246	0	22121	73801	307289	254587	0.248989212	0.249959812	0.357732177	4	53	Pacific dominion	Unequivocal early introduction	Q	0.447249009	0	0.018588388	0.062015354	0.258216503	0.213930745	0.080603742
19	GBIF	PRESERVED_SPECIMEN	XAL	2629689907	SPECIES	Theobroma	cacao		Theobroma cacao L.	Calzada, J.I.	s.n.	09/11/77	15.07220781	-92.16445129	0	44204	9	11	1977	507936	0	2991	16663	137346	540652	0.298245816	0.501045316	0.513379714	21	50	Mesoamerica	Unequivocal early introduction	T	0.421318062	0	0.002480947	0.013821471	0.113924492	0.448455028	0.016302418
20	GBIF	PRESERVED_SPECIMEN	IAC	1090577090	SPECIES	Theobroma	cacao		Theobroma cacao L.	Iatesta, C.S.	s.n.	09/10/08	-22.870251	-47.077171	0	44260	9	10	2008	7415	0	7108	17003	56424	205357	0.651038536	0.713057697	0.214842047	219	76	South American Atlantic coast	Unequivocal late introduction	G	0.025280679	0	0.024233994	0.057969977	0.192371815	0.700143536	0.082203971
21	GBIF	PRESERVED_SPECIMEN	ECO-SC-H	1894620848	SPECIES	Theobroma	cacao		Theobroma cacao L.	Nrm; et al.	s.n.	09/10/02	16.189028	-91.307028	0	44251	9	10	2002	20011	0	9193	24986	91149	1060194	0.773754778	0.846685886	0.178996504	20	49	Mesoamerica	Unequivocal early introduction	T	0.016599297	0	0.007625673	0.020726102	0.07560888	0.879440049	0.028351775
22	GBIF	PRESERVED_SPECIMEN	FMB	1707492952	SPECIES	Theobroma	cacao		Theobroma cacao L.	Malagon, D. & Acosta, W.	320	09/01/11	8.598649	-73.223469	1707492952	44259	9	1	2011	73631	0	9151	60082	428749	633946	0.566748628	0.615989506	0.234497083	8	54	Paramo province	Potential early introduction	P	0.061076231	0	0.00759067	0.049837461	0.355643316	0.525852322	0.057428131
23	GBIF	PRESERVED_SPECIMEN	US	1320542767	SPECIES	Theobroma	cacao		Theobroma cacao L.	Cornejo, X.F. & Bonitaz, C.	6735	09/01/99	-2.26	-79.13	1320542767	44270	9	1	1999	86245	0	16245	76841	455565	570618	0.548920663	0.583548963	0.230433352	10	62	Cauca province	Unequivocal early introduction	#N/A	0.071542097	0	0.01347558	0.063741276	0.377901045	0.473340003	0.077216855
24	GBIF	PRESERVED_SPECIMEN	ESA	2459942290	SPECIES	Theobroma	cacao		Theobroma cacao L.	Oliveira, S.A.	s.n.	08/09/92	-22.7103575	-47.6328752	2459942290	44214	8	9	1992	39948	0	22490	60833	207085	875235	0.658914942	0.726366639	0.220872871	220	76	South American Atlantic coast	Unequivocal late introduction	G	0.033135616	0	0.018654751	0.050459069	0.171770526	0.725980038	0.069113821
26	GBIF	PRESERVED_SPECIMEN	INPA	1042630336	SPECIES	Theobroma	cacao		Theobroma cacao L.	Rodrigues, W.A.	9751	08/09/77	-7.699823784	-65.83972312	1042630336	44260	8	9	1977	13077	0	499	1038	4207	1131106	0.826124804	0.841458857	0.116863601	1	65	Madeira province	Potential early introduction	J	0.011372026	0	0.000433941	0.000902666	0.003658493	0.983632874	0.001336607
27	GBIF	PRESERVED_SPECIMEN	MF	2310258279	SPECIES	Theobroma	cacao		Theobroma cacao L.	Vanneste	s.n.	08/07/15	38.89	-77.01	0	44217	8	7	2015	206412	0	19547	129943	789707	57634	0.292874693	0.398840219	0.308849653	15	33	North America	Unequivocal late introduction	B	0.171546396	0	0.016245264	0.10799398	0.656315474	0.047898887	0.124239243
28	GBIF	PRESERVED_SPECIMEN	US	1321794473	SPECIES	Theobroma	cacao		Theobroma cacao L.	Neste, K.M.; et al.	449	08/07/15	38.8872	-77.0129	1321794473	44238	8	7	2015	206412	0	19547	129943	789707	57634	0.292874693	0.398840219	0.308849653	15	33	North America	Unequivocal late introduction	B	0.171546396	0	0.016245264	0.10799398	0.656315474	0.047898887	0.124239243
29	GBIF	PRESERVED_SPECIMEN	CEPEC	1090443964	SPECIES	Theobroma	cacao		Theobroma cacao L.	Mattos-Silva, L.A.	2681	08/04/92	-14.77143504	-39.22770881	0	44252	8	4	1992	140721	0	6661	25484	176828	855630	0.644052284	0.763287425	0.315930606	215	70	South American Atlantic coast	Unequivocal late introduction	G	0.116749521	0	0.005526315	0.021142863	0.146705782	0.709875519	0.026669178
30	GBIF	PRESERVED_SPECIMEN	US	1321103261	SPECIES	Theobroma	cacao		Theobroma cacao L.	Williams, L.	11718	08/04/39	7.6110695	-64.9118461	1321103261	44239	8	4	1939	98493	0	96553	161975	145459	266166	0.417265168	0.343625084	0.281508317	2	55	Pacific dominion	Unequivocal early introduction	Q	0.128138311	0	0.125614392	0.210727695	0.189240561	0.346279041	0.336342087
32	GBIF	PRESERVED_SPECIMEN	NY	1929824911	SPECIES	Theobroma	cacao		Theobroma cacao L.	Heller, A.A. & Heller, E.G.	726	8/3/1899	18.297894	-65.793074	0	44228	8	3	1899	760574	0	1940	4613	11244	50969	-0.017329415	-0.073891625	0.237197972	4	47	Antilles	Unequivocal late introduction	A	0.917083464	0	0.002339209	0.005562254	0.013557769	0.061457303	0.007901464
35	GBIF	PRESERVED_SPECIMEN	AAU	47855578	SPECIES	Theobroma	cacao		Theobroma cacao L.	Korning, J.	s.n.	08/02/86	-0.55	-76.366	0	44260	8	2	1986	21255	0	1892	6179	27192	1149029	0.816607505	0.854238331	0.146636219	9	60	Napo province	Potential native area	U	0.017631001	0	0.001569412	0.005125474	0.022555736	0.953118377	0.006694886
36	GBIF	PRESERVED_SPECIMEN	LL	2807418872	SPECIES	Theobroma	cacao		Theobroma cacao L.	Lundell, C.L.	s.n.	08/02/64	16.79306	-93.09111	0	44204	8	2	1964	16045	0	5747	49579	350669	336649	0.553070459	0.562871516	0.212331889	22	48	Mesoamerica	Unequivocal early introduction	T	0.021148323	0	0.007574909	0.065348252	0.462203881	0.443724636	0.072923161
37	GBIF	PRESERVED_SPECIMEN	LL	1895444661	SPECIES	Theobroma	cacao		Theobroma cacao L.	Lundell, C.L.	s.n.	08/02/64	16.47855169	-90.55046633	0	44204	8	2	1964	8077	0	1528	7163	295668	796598	0.679489238	0.707317054	0.154849186	20	49	Mesoamerica	Unequivocal early introduction	T	0.007282915	0	0.001377776	0.006458774	0.266599581	0.718280954	0.00783655
39	GBIF	PRESERVED_SPECIMEN	KU	2311064966	SPECIES	Theobroma	cacao		Theobroma cacao L.	Alfredo-Vazquez	s.n.	08/12/10	14.47	-92.11	0	44217	8	12	2010	514820	0	3687	17761	130359	538970	0.322540942	0.492119104	0.481614864	21	50	Mesoamerica	Unequivocal early introduction	T	0.427024951	0	0.003058236	0.01473212	0.108128172	0.447056521	0.017790356
40	GBIF	PRESERVED_SPECIMEN	KU	2309476431	SPECIES	Theobroma	cacao		Theobroma cacao L.	Nayelly-Hernandez	s.n.	08/12/10	14.56	-92.1	0	44217	8	12	2010	507936	0	2991	16663	137346	540652	0.298245816	0.501045316	0.513379714	21	50	Mesoamerica	Unequivocal early introduction	T	0.421318062	0	0.002480947	0.013821471	0.113924492	0.448455028	0.016302418
41	GBIF	PRESERVED_SPECIMEN	ENCB	1896072642	SPECIES	Theobroma	cacao		Theobroma cacao L.	Meave, J.; et al.	s.n.	08/12/81	16.730833	-91.069167	0	44228	8	12	1981	20011	0	9193	24986	91149	1060194	0.773754778	0.846685886	0.178996504	20	48	Mesoamerica	Unequivocal early introduction	T	0.016599297	0	0.007625673	0.020726102	0.07560888	0.879440049	0.028351775
42	GBIF	PRESERVED_SPECIMEN	MEXU	1895556027	SPECIES	Theobroma	cacao		Theobroma cacao L.	Castillo, J.M.	s.n.	08/12/81	16.316944	-93.345556	0	44222	8	12	1981	52934	0	8652	36458	259446	441974	0.581422382	0.637847245	0.246828134	22	49	Mesoamerica	Unequivocal early introduction	T	0.066211862	0	0.010822251	0.045603054	0.324524932	0.552837901	0.056425305
43	GBIF	PRESERVED_SPECIMEN	ENCB	1893825459	SPECIES	Theobroma	cacao		Theobroma cacao L.	Disponible, N.O.	s.n.	08/12/81	16.69854869	-91.06045999	0	44228	8	12	1981	20011	0	9193	24986	91149	1060194	0.773754778	0.846685886	0.178996504	20	48	Mesoamerica	Unequivocal early introduction	T	0.016599297	0	0.007625673	0.020726102	0.07560888	0.879440049	0.028351775
44	GBIF	PRESERVED_SPECIMEN	CR	46082543	SUBSPECIES	Theobroma	cacao	Theobroma cacao. subsp. cacao	Theobroma cacao subsp. cacao	Ocampo, R.A.	s.n.	08/11/79	8.545823878	-82.92493219	0	44216	8	11	1979	547859	0	7444	19201	55823	574428	0.294851329	0.481288642	0.559418581	14	54	Puntarenas-Chiriquí province	Unequivocal early introduction	S	0.454747231	0	0.00617885	0.01593768	0.046335562	0.476800677	0.02211653
45	GBIF	PRESERVED_SPECIMEN	US	1317565251	FORM	Theobroma	cacao	Theobroma cacao f. pentagonum	Theobroma cacao L.	Cuatrecasas, J. & Soria, J.	26540	08/11/61	9.9067054	-83.6800512	1317565251	44215	8	11	1961	336294	0	13956	33738	101317	719380	0.488029121	0.739880562	0.463435559	15	53	Puntarenas-Chiriquí province	Unequivocal early introduction	S	0.279155132	0	0.011584771	0.028005661	0.084102483	0.597151953	0.039590432
46	GBIF	PRESERVED_SPECIMEN	US	1322146353	SPECIES	Theobroma	cacao		Theobroma cacao L.	Sintenis, P.	6370	8/11/1886	18.26542	-65.795499	1318232155	44235	8	11	1886	760574	0	1940	4613	11244	50969	-0.017329415	-0.073891625	0.237197972	4	47	Antilles	Unequivocal late introduction	A	0.917083464	0	0.002339209	0.005562254	0.013557769	0.061457303	0.007901464
47	GBIF	PRESERVED_SPECIMEN	US	1321495939	SPECIES	Theobroma	cacao		Theobroma cacao L.	Williams, D.E.	1038	08/10/89	-14.5	-67.5	1321495939	44239	8	10	1989	48986	0	8755	21726	48194	893354	0.778038581	0.8685624	0.222414152	1	70	Rondônia province	Potential early introduction	K	0.047977748	0	0.008574801	0.021278825	0.047202049	0.874966577	0.029853626
48	GBIF	PRESERVED_SPECIMEN	NY	1931013400	SPECIES	Theobroma	cacao		Theobroma cacao L.	Anderson, A.B.	1129	08/10/84	-1.42	-48.45	1291651581	44246	8	10	1984	331693	0	8572	27035	185859	652409	0.410442507	0.658553213	0.55760358	223	61	Pará province	Potential early introduction	H	0.275134211	0	0.007110341	0.022425114	0.154167164	0.54116317	0.029535455
49	GBIF	PRESERVED_SPECIMEN	L	2516393780	SPECIES	Theobroma	cacao		Theobroma cacao L.	L√∂rzing, J.A.	11912	07/09/27	3.3217968	98.5501283	2516393780	44209	7	9	1927	71874	0	6679	27943	179183	919686	0.668467555	0.765077531	0.239704123	129	58	Asia	Unequivocal late introduction	E	0.059628411	0	0.00554106	0.02318219	0.148654557	0.762993782	0.02872325
50	GBIF	PRESERVED_SPECIMEN	CR	46083253	SUBSPECIES	Theobroma	cacao	Theobroma cacao. subsp. cacao	Theobroma cacao subsp. cacao	Grayum, M.	s.n.	07/08/85	9.75	-84.55	0	44216	7	8	1985	825917	0	2208	5408	39722	236017	0.018597712	-0.193548381	0.436969101	15	53	Puntarenas-Chiriquí province	Unequivocal early introduction	S	0.744557692	0	0.001990495	0.00487527	0.035809071	0.212767473	0.006865764
51	GBIF	PRESERVED_SPECIMEN	U	2517196137	SPECIES	Theobroma	cacao		Theobroma cacao L.	Stoffers, A.L.	4131	07/08/53	12.1783611	-68.2385339	2517196137	44208	7	8	1953	1112300	0	4676	11239	20645	2665	-0.158654325	-0.142857149	0.16643222	5	52	North America	Unequivocal late introduction	B	0.965936476	0	0.004060702	0.009760101	0.017928399	0.002314322	0.013820803
52	GBIF	PRESERVED_SPECIMEN	L	2516368792	SPECIES	Theobroma	cacao		Theobroma cacao L.	Cuadra, A.	2353	07/08/49	5.75	117.866666	2516368792	44209	7	8	1949	220130	0	12381	34864	95543	842658	0.601856163	0.8233684	0.405492052	117	56	Asia	Unequivocal late introduction	E	0.182593217	0	0.01026978	0.028918957	0.079250914	0.698967133	0.039188736
53	GBIF	PRESERVED_SPECIMEN	US	1321951102	SPECIES	Theobroma	cacao		Theobroma cacao L.	Rodin, R.	594	07/07/45	13.444304	144.793731	1321951102	44238	7	7	1945	576757	0	2109	4900	13525	28209	0.025196634	-0.023316063	0.188931386	100	51	Oceania and Pacific islands	Unequivocal late introduction	F	0.922073541	0	0.003371703	0.007833733	0.021622702	0.045098321	0.011205436
54	GBIF	PRESERVED_SPECIMEN	CR	46081347	SUBSPECIES	Theobroma	cacao	Theobroma cacao. subsp. cacao	Theobroma cacao subsp. cacao	Burger, W.	s.n.	07/06/68	8.7	-83.51	0	44216	7	6	1968	573869	0	10540	26216	68443	526290	0.316018157	0.261051312	0.473064075	14	54	Puntarenas-Chiriquí province	Unequivocal early introduction	S	0.476098387	0	0.00874429	0.021749555	0.0567823	0.436625467	0.030493845
55	GBIF	PRESERVED_SPECIMEN	WAG	2626731355	SPECIES	Theobroma	cacao		Theobroma cacao L.	Idris, L.	s.n	07/06/24	-6.59	106.8	2626731355	44204	7	6	1924	356039	0	14930	52166	226985	555452	0.399941821	0.561941415	0.378201949	122	65	Asia	Unequivocal late introduction	E	0.295327861	0	0.012384163	0.043270746	0.18827992	0.46073731	0.055654909
56	GBIF	PRESERVED_SPECIMEN	INB	1253886610	SPECIES	Theobroma	cacao		Theobroma cacao L.	Vargas, L.D.; et al.	s.n.	07/05/09	9.715778	-82.819833	0	44222	7	5	2009	244911	0	1009	3099	10478	291915	0.425598926	0.757852763	0.473106928	14	53	Pacific dominion	Unequivocal early introduction	Q	0.444152467	0	0.001829848	0.005620117	0.019002125	0.529395443	0.007449965
57	GBIF	PRESERVED_SPECIMEN	U	2515513973	SPECIES	Theobroma	cacao		Theobroma cacao L.	Holliday, P.C. & Cope, F.W.	T99	07/04/53	-0.2025	-74.7909	2515513973	44211	7	4	1953	20739	0	4889	18466	82962	476769	0.688133221	0.789859891	0.209133806	8	60	Napo province	Potential native area	U	0.034346044	0	0.008096717	0.030581708	0.137394113	0.789581418	0.038678425
58	GBIF	PRESERVED_SPECIMEN	FMB	1707552954	SPECIES	Theobroma	cacao		Theobroma cacao L.	Rudas, A.; et al.	1503	07/03/91	-3.783333	-70.25	1707552954	44260	7	3	1991	45405	0	6479	20991	72181	650100	0.692628188	0.798938602	0.245448333	4	63	Imerí province	Potential early introduction	L	0.057102003	0	0.008148087	0.026398593	0.090775898	0.817575419	0.03454668
59	GBIF	PRESERVED_SPECIMEN	FMB	1707579592	SPECIES	Theobroma	cacao		Theobroma cacao L.	Prieto, A.; et al.	2061	07/02/04	-3.722222	-70.307222	1707579592	44259	7	2	2004	45405	0	6479	20991	72181	650100	0.692628188	0.798938602	0.245448333	4	63	Imerí province	Potential early introduction	L	0.057102003	0	0.008148087	0.026398593	0.090775898	0.817575419	0.03454668
60	GBIF	PRESERVED_SPECIMEN	SERO	1897574008	SPECIES	Theobroma	cacao		Theobroma cacao L.	R., G.; et al.	s.n.	07/12/97	17.125278	-94.32	0	44251	7	12	1997	76242	0	3350	36115	261554	828326	0.628236303	0.756166995	0.357210292	23	48	Mesoamerica	Unequivocal early introduction	T	0.063240562	0	0.002778729	0.029956362	0.216951576	0.68707277	0.032735091
61	GBIF	PRESERVED_SPECIMEN	SERO	1897573990	SPECIES	Theobroma	cacao		Theobroma cacao L.	R., G.; et al.	s.n.	07/12/97	17.111944	-94.316944	0	44251	7	12	1997	76242	0	3350	36115	261554	828326	0.628236303	0.756166995	0.357210292	23	48	Mesoamerica	Unequivocal early introduction	T	0.063240562	0	0.002778729	0.029956362	0.216951576	0.68707277	0.032735091
62	GBIF	PRESERVED_SPECIMEN	US	1319818970	SPECIES	Theobroma	cacao		Theobroma cacao L.	Garcia-Barriga, H.	8388	07/12/39	5.07386	-74.96405	1319818970	44270	7	12	1939	47669	0	8669	29071	209603	910552	0.67108794	0.735784054	0.200843708	8	57	Magdalena province	Unequivocal early introduction	R	0.039540829	0	0.007190825	0.024114025	0.173863022	0.755291299	0.03130485
63	GBIF	PRESERVED_SPECIMEN	US	2284143188	FORM	Theobroma	cacao	Theobroma cacao. f. pentagonum	Theobroma cacao L.	Cuatrecasas, J. & Soria, J.	26540	07/11/61	9.823767631	-83.54448446	2284143188	44214	7	11	1961	336294	0	13956	33738	101317	719380	0.488029121	0.739880562	0.463435559	15	53	Puntarenas-Chiriquí province	Unequivocal early introduction	S	0.279155132	0	0.011584771	0.028005661	0.084102483	0.597151953	0.039590432
64	GBIF	PRESERVED_SPECIMEN	MA	1936308298	SPECIES	Theobroma	cacao		Theobroma cacao L.	Cuatrecasas, J. & Paredes, A.C.	26539	07/11/61	9.9913106	-83.0415078	1322190458	44235	7	11	1961	728580	0	705	2609	17814	454937	0.274036815	-0.037151702	0.439671197	14	53	Pacific dominion	Unequivocal early introduction	Q	0.604808886	0	0.000585235	0.002165783	0.014787759	0.377652337	0.002751018
65	GBIF	PRESERVED_SPECIMEN	HUA	1123894347	SPECIES	Theobroma	cacao		Theobroma cacao L.	Rios, C.	1	06/09/82	6.926773	-75.571515	0	44225	6	9	1982	6976	0	1840	5527	50316	514488	0.755887866	0.805447459	0.167634432	9	55	Magdalena province	Unequivocal early introduction	R	0.012045301	0	0.003177086	0.009543346	0.086879497	0.88835477	0.012720432
66	GBIF	PRESERVED_SPECIMEN	UCR	2422513659	SPECIES	Theobroma	cacao		Theobroma cacao L.	Salvato, T.B. & Provance, M.	509	06/08/03	15.88917	-96.45139	0	44215	6	8	2003	551846	0	842	5730	97320	549357	0.293702647	0.509083569	0.514075829	24	49	Mesoamerica	Unequivocal early introduction	T	0.457927383	0	0.0006987	0.004754812	0.080757119	0.455861986	0.005453512
67	GBIF	PRESERVED_SPECIMEN	INPA	1042498914	SPECIES	Theobroma	cacao		Theobroma cacao L.	Silva, M.F.F. & Cort√™s, A.	30	06/07/91	-2.625919383	-60.25962801	1042498914	44260	6	7	1991	556	0	212	1539	8785	600031	0.823290182	0.834296703	0.065943966	231	62	Roraima province	Potential early introduction	M	0.0009098	0	0.000346902	0.002518315	0.014375175	0.981849808	0.002865217
68	GBIF	PRESERVED_SPECIMEN	US	1322280987	SPECIES	Theobroma	cacao		Theobroma cacao L.	Cook, O.F. & Gilbert, G.B.	1668	06/07/15	-12.8877915	-72.7333604	1322280987	44235	6	7	1915	99608	0	17856	64817	325338	549958	0.575490303	0.620747328	0.270647044	4	69	South American Atlantic coast	Unequivocal late introduction	G	0.094185104	0	0.016883877	0.061288209	0.307625828	0.520016982	0.078172086
69	GBIF	PRESERVED_SPECIMEN	HST	2452736109	SPECIES	Theobroma	cacao		Theobroma cacao L.	Saba, M.D.	1	06/04/02	-12.05	-38.3	0	44215	6	4	2002	47820	0	8567	39892	373875	735355	0.601169574	0.649466217	0.218256235	215	68	South American Atlantic coast	Unequivocal late introduction	G	0.039667891	0	0.007106542	0.033091416	0.310138705	0.609995446	0.040197958
70	GBIF	PRESERVED_SPECIMEN	MG	1314846066	SPECIES	Theobroma	cacao		Theobroma cacao L.	Saba, M.D.	1	06/04/02	-12.000833	-38.3	1094782947	44238	6	4	2002	47820	0	8567	39892	373875	735355	0.601169574	0.649466217	0.218256235	215	68	South American Atlantic coast	Unequivocal late introduction	G	0.039667891	0	0.007106542	0.033091416	0.310138705	0.609995446	0.040197958
71	GBIF	PRESERVED_SPECIMEN	SPF	1226936124	SPECIES	Theobroma	cacao		Theobroma cacao L.	Saba, M.D.	1	06/04/02	-12.5	-38.3	1094782947	44260	6	4	2002	47820	0	8567	39892	373875	735355	0.601169574	0.649466217	0.218256235	215	69	South American Atlantic coast	Unequivocal late introduction	G	0.039667891	0	0.007106542	0.033091416	0.310138705	0.609995446	0.040197958
73	GBIF	PRESERVED_SPECIMEN	U	2515542328	SPECIES	Theobroma	cacao		Theobroma cacao L.	Lawesson, J.E.; et al.	39362	06/03/83	-0.516667	-76.383333	2515542328	44211	6	3	1983	21255	0	1892	6179	27192	1149029	0.816607505	0.854238331	0.146636219	9	60	Napo province	Potential native area	U	0.017631001	0	0.001569412	0.005125474	0.022555736	0.953118377	0.006694886
74	GBIF	PRESERVED_SPECIMEN	MA	1936138175	SPECIES	Theobroma	cacao		Theobroma cacao L.	J.e.lawesson, T.L. & Jorgense, P.M.	s.n.	06/03/83	-0.5167	-76.3833	0	44245	6	3	1983	21255	0	1892	6179	27192	1149029	0.816607505	0.854238331	0.146636219	9	60	Napo province	Potential native area	U	0.017631001	0	0.001569412	0.005125474	0.022555736	0.953118377	0.006694886
75	GBIF	PRESERVED_SPECIMEN	AAU	47855508	SPECIES	Theobroma	cacao		Theobroma cacao L.	Lawesson, J.E.	s.n.	06/03/83	-0.516	-76.383	0	44260	6	3	1983	21255	0	1892	6179	27192	1149029	0.816607505	0.854238331	0.146636219	9	60	Napo province	Potential native area	U	0.017631001	0	0.001569412	0.005125474	0.022555736	0.953118377	0.006694886
76	GBIF	PRESERVED_SPECIMEN	US	1318043671	SPECIES	Theobroma	cacao		Theobroma cacao L.	Graham, J.	704	06/02/00	-10.06666667	-71.1	1318043671	44271	6	2	2000	2902	0	332	1035	4402	1196931	0.875665598	0.882218838	0.059679468	4	67	Rondônia province	Potential early introduction	K	0.002407096	0	0.000275381	0.000858492	0.003651288	0.992807743	0.001133873
77	GBIF	PRESERVED_SPECIMEN	XAL	2629746926	SPECIES	Theobroma	cacao		Theobroma cacao L.	R., A.P.G.; et al.	s.n.	06/12/00	17.097778	-93.593611	0	44204	6	12	2000	20705	0	1233	12434	202140	560518	0.669814418	0.731169313	0.219668098	22	48	Mesoamerica	Unequivocal early introduction	T	0.025977692	0	0.001546993	0.015600417	0.253616551	0.703258347	0.01714741
79	GBIF	PRESERVED_SPECIMEN	XAL	2629687189	SPECIES	Theobroma	cacao		Theobroma cacao L.	Solheim, S.L. & Benz, B.	s.n.	06/12/83	17.016667	-99.083333	0	44204	6	12	1983	600769	0	1834	8083	145329	449031	0.128811787	0.177996002	0.575535354	26	48	Mesoamerica	Unequivocal early introduction	T	0.498544454	0	0.001521934	0.006707628	0.120600375	0.372625609	0.008229561
80	GBIF	PRESERVED_SPECIMEN	US	1318969434	SPECIES	Theobroma	cacao		Theobroma cacao L.	Standley, P.C.	52877	06/12/28	15.70464534	-87.59825701	1318969434	44211	6	12	1928	550550	0	1059	3852	36130	613851	0.351002895	0.62833333	0.500372194	18	49	Mesoamerica	Unequivocal early introduction	T	0.456720439	0	0.000878516	0.003195508	0.029972408	0.509233128	0.004074024
81	GBIF	PRESERVED_SPECIMEN	US	1322023068	SPECIES	Theobroma	cacao		Theobroma cacao L.	Standley, P.C.	54879	06/12/27	15.7383571	-87.4582997	1322023068	44237	6	12	1927	550550	0	1059	3852	36130	613851	0.351002895	0.62833333	0.500372194	18	49	Mesoamerica	Unequivocal early introduction	T	0.456720439	0	0.000878516	0.003195508	0.029972408	0.509233128	0.004074024
82	GBIF	PRESERVED_SPECIMEN	FTG	123015610	SPECIES	Theobroma	cacao		Theobroma cacao L.	Frances, A.L.	s.n.	06/11/02	8.833611	-83.090833	0	44260	6	11	2002	547859	0	7444	19201	55823	574428	0.294851329	0.481288642	0.559418581	14	54	Puntarenas-Chiriquí province	Unequivocal early introduction	S	0.454747231	0	0.00617885	0.01593768	0.046335562	0.476800677	0.02211653
83	GBIF	PRESERVED_SPECIMEN	CR	46084220	SUBSPECIES	Theobroma	cacao	Theobroma cacao. subsp. cacao	Theobroma cacao subsp. cacao	Frances, A.	s.n.	06/11/02	8.83	-83.09	0	44216	6	11	2002	547859	0	7444	19201	55823	574428	0.294851329	0.481288642	0.559418581	14	54	Puntarenas-Chiriquí province	Unequivocal early introduction	S	0.454747231	0	0.00617885	0.01593768	0.046335562	0.476800677	0.02211653
85	GBIF	PRESERVED_SPECIMEN	US	1320579535	SPECIES	Theobroma	cacao		Theobroma cacao L.	Leonard, E.C.	8550	06/01/26	19.5269646	-72.2437813	1320579535	44266	6	1	1926	164702	0	10662	49357	341882	294401	0.412800126	0.505295932	0.347179951	9	46	Antilles	Unequivocal late introduction	A	0.191290633	0	0.012383218	0.057324937	0.397073649	0.341927564	0.069708155
86	GBIF	PRESERVED_SPECIMEN	US	2284378619	SPECIES	Theobroma	cacao	Forastero amenolado variety	Theobroma cacao L.	Cuatrecasas, J. & Aristeguieta, L.	25805	05/09/61	10.433333	-66.766667	2284378619	44221	5	9	1961	324208	0	10775	29435	85690	755103	0.550625649	0.777835846	0.385064291	4	53	Pacific dominion	Unequivocal early introduction	Q	0.269005178	0	0.008940343	0.024423109	0.071099583	0.626531786	0.033363453
87	GBIF	PRESERVED_SPECIMEN	XAL	2629651717	SPECIES	Theobroma	cacao		Theobroma cacao L.	C. Romero, T.	s.n.	05/07/79	17.998333	-93.298611	0	44204	5	7	1979	757149	0	7452	18907	80955	338708	0.152535399	-0.088372096	0.433677244	22	48	Mesoamerica	Unequivocal early introduction	T	0.629294589	0	0.006193633	0.015714308	0.0672847	0.281512769	0.021907942
88	GBIF	PRESERVED_SPECIMEN	ENCB	1896072651	SPECIES	Theobroma	cacao		Theobroma cacao L.	Romero	s.n.	05/07/79	18.021389	-93.291944	0	44228	5	7	1979	757149	0	7452	18907	80955	338708	0.152535399	-0.088372096	0.433677244	22	48	Mesoamerica	Unequivocal early introduction	T	0.629294589	0	0.006193633	0.015714308	0.0672847	0.281512769	0.021907942
89	GBIF	PRESERVED_SPECIMEN	ASE	2464818288	SPECIES	Theobroma	cacao		Theobroma cacao L.	Carmo, V.S.; et al.	146	05/05/14	-14.4316	-39.224	0	44211	5	5	2014	99366	0	672	6660	152944	945299	0.673434088	0.814982414	0.340831112	215	70	South American Atlantic coast	Unequivocal late introduction	G	0.082465449	0	0.000557704	0.005527242	0.126930696	0.78451891	0.006084945
90	GBIF	PRESERVED_SPECIMEN	UEC	2273363224	SPECIES	Theobroma	cacao		Theobroma cacao L.	Carmo, V.S.; et al.	151	05/05/14	-14.721111	-39.377778	2273363224	44242	5	5	2014	140721	0	6661	25484	176828	855630	0.644052284	0.763287425	0.315930606	216	70	South American Atlantic coast	Unequivocal late introduction	G	0.116749521	0	0.005526315	0.021142863	0.146705782	0.709875519	0.026669178
91	GBIF	PRESERVED_SPECIMEN	VIC	2243139473	SPECIES	Theobroma	cacao		Theobroma cacao L.	Carmo, V.S.	148	05/05/14	-14.76121031	-39.42074221	0	44221	5	5	2014	140721	0	6661	25484	176828	855630	0.644052284	0.763287425	0.315930606	216	70	South American Atlantic coast	Unequivocal late introduction	G	0.116749521	0	0.005526315	0.021142863	0.146705782	0.709875519	0.026669178
92	GBIF	PRESERVED_SPECIMEN	HURB	1944965970	SPECIES	Theobroma	cacao		Theobroma cacao L.	Carmo, V.S.; et al.	157	05/05/14	-14.721111	-39.367778	0	44225	5	5	2014	140721	0	6661	25484	176828	855630	0.644052284	0.763287425	0.315930606	216	70	South American Atlantic coast	Unequivocal late introduction	G	0.116749521	0	0.005526315	0.021142863	0.146705782	0.709875519	0.026669178
93	GBIF	PRESERVED_SPECIMEN	US	2284210495	SPECIES	Theobroma	cacao		Theobroma cacao L.	Liesner, R.L. & Guariglia, M.	11841	05/05/81	7.5833	-72.1333	1321623796	44224	5	5	1981	61393	0	8732	58564	514229	562643	0.553503951	0.576956153	0.212602663	7	55	Paramo province	Potential early introduction	P	0.050924839	0	0.007243101	0.048578214	0.426547475	0.466706372	0.055821315
94	GBIF	PRESERVED_SPECIMEN	US	1318852944	SPECIES	Theobroma	cacao		Theobroma cacao L.	Little, E.L. & Little, R.R.	9574	05/03/45	0.7488307	-75.2325525	1228611713	44252	5	3	1945	29719	0	4559	14764	69006	1087550	0.772680652	0.844256759	0.194574667	8	59	Napo province	Potential native area	U	0.024650837	0	0.003781526	0.012246205	0.057237985	0.902083447	0.016027731
96	GBIF	PRESERVED_SPECIMEN	US	1319541617	SPECIES	Theobroma	cacao		Theobroma cacao L.	Altamirano, S.; et al.	3605	05/10/06	-17.4139766	-66.1653224	1319541617	44270	5	10	2006	72932	0	102071	348477	544750	137190	0.362309245	0.334077388	0.181105823	233	72	South American Atlantic coast	Unequivocal late introduction	G	0.060503393	0	0.08467671	0.289091769	0.451917174	0.113810954	0.373768479
97	GBIF	PRESERVED_SPECIMEN	US	2284179532	SPECIES	Theobroma	cacao		Theobroma cacao L.	Cuatrecasas, J. & Willard, L.	26225	05/10/61	6.4428257	-75.7277669	1319106026	44224	5	10	1961	24867	0	5908	17557	117505	416423	0.646388226	0.713043451	0.202567436	9	56	Magdalena province	Unequivocal early introduction	R	0.042707725	0	0.01014667	0.030153196	0.20180847	0.715183938	0.040299866
98	GBIF	PRESERVED_SPECIMEN	IAP	1802879207	SPECIES	Theobroma	cacao		Theobroma cacao L.	Rau, W.	s.n.	05/01/36	-22.92688214	-43.45582532	0	44222	5	1	1936	785887	0	12109	34788	79781	292128	0.172428217	-0.043478262	0.393763827	217	76	South American Atlantic coast	Unequivocal late introduction	G	0.652354583	0	0.010051524	0.028877067	0.066225171	0.242491656	0.03892859
99	GBIF	PRESERVED_SPECIMEN	CEPEC	1944981719	SPECIES	Theobroma	cacao		Theobroma cacao L.	Rocha, F.O.	121	04/09/14	-14.220278	-39.059722	0	44245	4	9	2014	99366	0	672	6660	152944	945299	0.673434088	0.814982414	0.340831112	215	70	South American Atlantic coast	Unequivocal late introduction	G	0.082465449	0	0.000557704	0.005527242	0.126930696	0.78451891	0.006084945
100	GBIF	PRESERVED_SPECIMEN	IAC	1090554060	SPECIES	Theobroma	cacao		Theobroma cacao L.	Savina	205	04/09/84	-22.9056	-47.0608	0	44260	4	9	1984	7415	0	7108	17003	56424	205357	0.651038536	0.713057697	0.214842047	219	76	South American Atlantic coast	Unequivocal late introduction	G	0.025280679	0	0.024233994	0.057969977	0.192371815	0.700143536	0.082203971
101	GBIF	PRESERVED_SPECIMEN	UCR	2422420232	SPECIES	Theobroma	cacao		Theobroma cacao L.	Helm, A.	3	04/08/98	-12	-72	0	44215	4	8	1998	47809	0	5749	14241	35034	1100079	0.822059501	0.889600515	0.200094458	4	68	Rondônia province	Potential early introduction	K	0.039744387	0	0.004779236	0.011838771	0.029124325	0.914513281	0.016618007
103	GBIF	PRESERVED_SPECIMEN	US	1322158198	SPECIES	Theobroma	cacao		Theobroma cacao L.	Burger, W.C. & Stolze, R.G.	5505	04/06/68	8.7	-83.51666667	1322158198	44235	4	6	1968	573869	0	10540	26216	68443	526290	0.316018157	0.261051312	0.473064075	14	54	Puntarenas-Chiriquí province	Unequivocal early introduction	S	0.476098387	0	0.00874429	0.021749555	0.0567823	0.436625467	0.030493845
104	GBIF	PRESERVED_SPECIMEN	COAH	768735584	SPECIES	Theobroma	cacao		Theobroma cacao L.	Alvarez, E.; et al.	284	04/05/90	-0.6	-72.16	768735584	44223	4	5	1990	50755	0	11476	23542	44120	924092	0.755338907	0.836630523	0.226952747	6	60	Imerí province	Potential early introduction	L	0.048155334	0	0.0108882	0.022336181	0.041860178	0.876760106	0.033224382
105	GBIF	PRESERVED_SPECIMEN	FMB	1707546871	SPECIES	Theobroma	cacao		Theobroma cacao L.	Alvarez, E.; et al.	284	04/05/90	-0.6	-72.166667	768735584	44259	4	5	1990	50755	0	11476	23542	44120	924092	0.755338907	0.836630523	0.226952747	6	60	Imerí province	Potential early introduction	L	0.048155334	0	0.0108882	0.022336181	0.041860178	0.876760106	0.033224382
106	GBIF	PRESERVED_SPECIMEN	MEXU	2629975997	SPECIES	Theobroma	cacao		Theobroma cacao L.	Arg	s.n.	04/04/98	16.89876111	-90.97354144	0	44204	4	4	1998	10313	0	2743	8239	39231	391366	0.735226204	0.808071285	0.175133834	20	48	Mesoamerica	Unequivocal early introduction	T	0.022821825	0	0.006070034	0.018232232	0.086814991	0.866060917	0.024302267
107	GBIF	PRESERVED_SPECIMEN	HERBAM	1801348636	SPECIES	Theobroma	cacao		Theobroma cacao L.	Rodrigues, L.; et al.	1771173	04/02/16	-9.875667	-56.065528	0	44260	4	2	2016	7691	0	1864	6085	45252	663961	0.789473016	0.859275043	0.169999362	227	67	Madeira province	Potential early introduction	J	0.010610427	0	0.002571556	0.008394806	0.06242921	0.915994002	0.010966361
108	GBIF	PRESERVED_SPECIMEN	KU	2306875301	SPECIES	Theobroma	cacao		Theobroma cacao L.	Alfredo-Vazquez	s.n.	04/02/11	15.1	-92.38	0	44217	4	2	2011	507936	0	2991	16663	137346	540652	0.298245816	0.501045316	0.513379714	21	50	Mesoamerica	Unequivocal early introduction	T	0.421318062	0	0.002480947	0.013821471	0.113924492	0.448455028	0.016302418
109	GBIF	PRESERVED_SPECIMEN	KU	2306347874	SPECIES	Theobroma	cacao		Theobroma cacao L.	Alfredo-Vazquez	s.n.	04/02/11	15.11	-92.36	0	44217	4	2	2011	507936	0	2991	16663	137346	540652	0.298245816	0.501045316	0.513379714	21	50	Mesoamerica	Unequivocal early introduction	T	0.421318062	0	0.002480947	0.013821471	0.113924492	0.448455028	0.016302418
110	GBIF	PRESERVED_SPECIMEN	CIB	1418340309	SPECIES	Theobroma	cacao		Theobroma cacao L.	M. Vazquez, T.	s.n.	04/02/95	18.0025	-93.372222	0	44228	4	2	1995	757149	0	7452	18907	80955	338708	0.152535399	-0.088372096	0.433677244	22	48	Mesoamerica	Unequivocal early introduction	T	0.629294589	0	0.006193633	0.015714308	0.0672847	0.281512769	0.021907942
111	GBIF	PRESERVED_SPECIMEN	CR	46081479	SUBSPECIES	Theobroma	cacao	Theobroma cacao. subsp. cacao	Theobroma cacao subsp. cacao	Poveda, L.J.	s.n.	04/02/73	9.7	-84.39	0	44216	4	2	1973	825917	0	2208	5408	39722	236017	0.018597712	-0.193548381	0.436969101	15	53	Puntarenas-Chiriquí province	Unequivocal early introduction	S	0.744557692	0	0.001990495	0.00487527	0.035809071	0.212767473	0.006865764
112	GBIF	PRESERVED_SPECIMEN	US	1321739035	SPECIES	Theobroma	cacao		Theobroma cacao L.	Kellerman, W.A.	5565	04/02/06	14.62303	-91.59889	1321739035	44238	4	2	1906	62508	0	14304	80981	354946	548323	0.567759871	0.612281531	0.235850223	20	50	Mesoamerica	Unequivocal early introduction	T	0.058910789	0	0.013480833	0.076320705	0.334519566	0.516768106	0.089801538
113	GBIF	PRESERVED_SPECIMEN	CEPEC	1944981338	SPECIES	Theobroma	cacao		Theobroma cacao L.	Fernandes, M.H.	248	04/12/14	-16.560278	-39.420278	0	44245	4	12	2014	280378	0	10203	34271	151226	729503	0.439584443	0.681151271	0.529234408	215	71	South American Atlantic coast	Unequivocal late introduction	G	0.232566704	0	0.008463139	0.028426958	0.125438274	0.605104925	0.036890097
114	GBIF	PRESERVED_SPECIMEN	MG	1314848141	SPECIES	Theobroma	cacao		Theobroma cacao L.	Lucas, F.C.A.	s.n.	04/12/10	-1.730313589	-48.8830317	0	44235	4	12	2010	331693	0	8572	27035	185859	652409	0.410442507	0.658553213	0.55760358	224	61	Pará province	Potential early introduction	H	0.275134211	0	0.007110341	0.022425114	0.154167164	0.54116317	0.029535455
115	GBIF	PRESERVED_SPECIMEN	NY	1929769162	SPECIES	Theobroma	cacao		Theobroma cacao L.	Williams, D.E.	1096	04/12/89	-14.75	-67.5	0	44249	4	12	1989	4703	0	421	1371	10844	506457	0.815136947	0.843332291	0.115133044	1	70	Rondônia province	Potential early introduction	K	0.008978686	0	0.000803748	0.002617431	0.020702716	0.966897418	0.003421179
116	GBIF	PRESERVED_SPECIMEN	AAU	47855343	SPECIES	Theobroma	cacao		Theobroma cacao L.	Balslev, H.	s.n.	04/12/83	-0.5	-77.3	0	44260	4	12	1983	51084	0	6312	17255	58332	686492	0.700566743	0.787740827	0.216154135	9	60	Napo province	Potential native area	U	0.062337472	0	0.007702492	0.021056164	0.071182159	0.837721712	0.028758656
117	GBIF	PRESERVED_SPECIMEN	XAL	2629718549	SPECIES	Theobroma	cacao		Theobroma cacao L.	M., A.M.A.	s.n.	04/12/67	17.756667	-94.761667	0	44204	4	12	1967	11927	0	1537	7184	64996	1119938	0.762392411	0.791417181	0.155623673	23	48	Mesoamerica	Unequivocal early introduction	T	0.009893147	0	0.001274903	0.005958948	0.05391255	0.928960452	0.007233851
118	GBIF	PRESERVED_SPECIMEN	INIF	1893418132	SPECIES	Theobroma	cacao		Theobroma cacao L.	M., A.M.A.	s.n.	04/12/67	17.758333	-94.775	0	44221	4	12	1967	11927	0	1537	7184	64996	1119938	0.762392411	0.791417181	0.155623673	23	48	Mesoamerica	Unequivocal early introduction	T	0.009893147	0	0.001274903	0.005958948	0.05391255	0.928960452	0.007233851
119	GBIF	PRESERVED_SPECIMEN	CR	46083079	SUBSPECIES	Theobroma	cacao	Theobroma cacao. subsp. cacao	Theobroma cacao subsp. cacao	Grayum, M.	s.n.	04/11/84	9.61	-82.65	0	44216	4	11	1984	244911	0	1009	3099	10478	291915	0.425598926	0.757852763	0.473106928	14	53	North America	Unequivocal late introduction	B	0.444152467	0	0.001829848	0.005620117	0.019002125	0.529395443	0.007449965
120	GBIF	PRESERVED_SPECIMEN	NY	1930135504	SPECIES	Theobroma	cacao		Theobroma cacao L.	Maguire, B.; et al.	60091	04/11/65	-0.25	-65.92	1930135504	44249	4	11	1965	46194	0	4897	17544	51494	1085283	0.789550966	0.862292707	0.207095217	2	60	Imerí province	Potential early introduction	L	0.038322167	0	0.004062511	0.01455436	0.042719004	0.900341958	0.018616871
121	GBIF	PRESERVED_SPECIMEN	MO	1258680108	SPECIES	Theobroma	cacao		Theobroma cacao L.	Beck, S.G.; et al.	19042	04/10/89	-11.25	-69.08333	1258680108	44169	4	10	1989	1376	0	241	829	7084	826332	0.870223329	0.888494313	0.072959655	2	68	Rondônia province	Potential early introduction	K	0.001646205	0	0.000288325	0.000991791	0.008475083	0.988598596	0.001280116
122	GBIF	PRESERVED_SPECIMEN	XAL	2629614510	SPECIES	Theobroma	cacao		Theobroma cacao L.	M. Ambrosio, M.	s.n.	04/01/93	19.9325	-96.908889	0	44204	4	1	1993	897181	0	1969	7229	52504	243337	0.135185403	-0.017013233	0.328475723	25	46	Mesoamerica	Unequivocal early introduction	T	0.746270233	0	0.001637803	0.006013043	0.043672539	0.202406382	0.007650846
123	GBIF	PRESERVED_SPECIMEN	UIS	1062311590	SPECIES	Theobroma	cacao		Theobroma cacao L.	Leticia, B.	37	04/01/85	6.868160788	-73.52244879	0	44216	4	1	1985	27806	0	3996	21162	172975	979639	0.709621319	0.770133555	0.197063739	8	55	Magdalena province	Unequivocal early introduction	R	0.023064455	0	0.003314593	0.017553406	0.143478896	0.81258865	0.020867999
124	GBIF	PRESERVED_SPECIMEN	US	1322534356	SPECIES	Theobroma	cacao		Theobroma cacao L.	Standley, P.C.	29673	04/01/24	8.9381353	-79.6312617	1322534356	44230	4	1	1924	965387	0	9293	22448	58660	149730	0.019693257	-0.097276263	0.326254857	12	54	North America	Unequivocal late introduction	B	0.80080679	0	0.007708719	0.018621041	0.04865958	0.124203869	0.02632976
125	GBIF	PRESERVED_SPECIMEN	US	1317744065	SPECIES	Theobroma	cacao		Theobroma cacao L.	Asplund, E.	13408	31/08/40	-9.9207648	-76.2410843	1317744065	44214	31	8	1940	29391	0	5722	24491	397920	630917	0.652321348	0.667100966	0.215006992	7	67	South American Atlantic coast	Unequivocal late introduction	G	0.027002842	0	0.00525706	0.02250099	0.36558711	0.579651998	0.02775805
127	GBIF	PRESERVED_SPECIMEN	NY	1927898372	SPECIES	Theobroma	cacao		Theobroma cacao L.	Cid-Ferreira, C.A. & Nelson, B.W.	2629	30/09/80	-9.125414	-68.675644	1318474795	44251	30	9	1980	15220	0	3651	10134	42613	1071969	0.802087929	0.847659826	0.138518048	2	66	Rondônia province	Potential early introduction	K	0.013309001	0	0.003192586	0.008861591	0.037262578	0.937374244	0.012054177
128	GBIF	PRESERVED_SPECIMEN	G	1144793932	SPECIES	Theobroma	cacao		Theobroma cacao L.	Collectif, P.G.	s.n.	30/09/55	-10.77306	-53.08972	0	44259	30	9	1955	9935	0	1361	10571	84874	1098843	0.775412041	0.834469914	0.14726726	225	67	Xingu-Tapajós province	Potential early introduction	I	0.008240819	0	0.001128913	0.008768365	0.070400735	0.911461167	0.009897278
129	GBIF	PRESERVED_SPECIMEN	CEPEC	1944978280	SPECIES	Theobroma	cacao		Theobroma cacao L.	Oliveira, N.E.	269	30/08/14	-13.320278	-39.060278	0	44245	30	8	2014	27040	0	3925	27534	214092	794532	0.675935344	0.736553252	0.227510377	216	69	South American Atlantic coast	Unequivocal late introduction	G	0.02533916	0	0.003678114	0.025802087	0.20062542	0.74455522	0.029480201
130	GBIF	PRESERVED_SPECIMEN	XAL	2629585999	SPECIES	Theobroma	cacao		Theobroma cacao L.	Castillo-Campos, G.	s.n.	30/08/96	19.303611	-96.679444	0	44204	30	8	1996	363265	0	22409	84132	270250	465484	0.385664009	0.45440957	0.35738115	25	47	Mesoamerica	Unequivocal early introduction	T	0.301329695	0	0.01858835	0.069787813	0.224173399	0.386120743	0.088376163
132	GBIF	PRESERVED_SPECIMEN	IEB	1897350237	SPECIES	Theobroma	cacao		Theobroma cacao L.	G. Castillo, C.	s.n.	30/08/96	18.78214814	-96.83915803	0	44221	30	8	1996	134709	0	19896	104408	332484	614001	0.534952506	0.608795375	0.282529702	25	47	Mesoamerica	Unequivocal early introduction	T	0.111745519	0	0.016504382	0.086609849	0.275806347	0.509333902	0.103114232
134	GBIF	PRESERVED_SPECIMEN	US	1317783048	SPECIES	Theobroma	cacao		Theobroma cacao L.	Steyermark, J.A.	99893	30/08/67	10.0605329	-72.5500596	1317783048	44271	30	8	1967	65088	0	14190	70504	372926	681540	0.608697032	0.652727246	0.241643324	7	53	Pacific dominion	Unequivocal early introduction	Q	0.054048668	0	0.011783287	0.05854608	0.309675416	0.565946549	0.070329367
135	GBIF	PRESERVED_SPECIMEN	COAH	768739811	SPECIES	Theobroma	cacao		Theobroma cacao L.	C√°rdenas, D.; et al.	7244	30/06/96	2.51	-73.9	768739811	44216	30	6	1996	4853	0	1125	3230	21530	194813	0.750040834	0.830303013	0.172955201	7	58	Imerí province	Potential early introduction	L	0.021516198	0	0.004987785	0.014320486	0.09545513	0.8637204	0.019308272
136	GBIF	PRESERVED_SPECIMEN	HUA	1123910108	SPECIES	Theobroma	cacao		Theobroma cacao L.	C√°rdenas, D.; et al.	11	30/06/83	6.08298	-74.84719	1123910108	44225	30	6	1983	28236	0	3710	13044	275986	884611	0.685555121	0.736332417	0.187832974	9	56	Magdalena province	Unequivocal early introduction	R	0.023420956	0	0.003077339	0.010819626	0.228922508	0.733759571	0.013896965
137	GBIF	PRESERVED_SPECIMEN	NY	1927914260	SPECIES	Theobroma	cacao		Theobroma cacao L.	Unspecified, C.	10060	30/06/82	-0.52	-76.4	1319801218	44251	30	6	1982	21255	0	1892	6179	27192	1149029	0.816607505	0.854238331	0.146636219	9	60	Napo province	Potential native area	U	0.017631001	0	0.001569412	0.005125474	0.022555736	0.953118377	0.006694886
138	GBIF	PRESERVED_SPECIMEN	US	1319801218	SPECIES	Theobroma	cacao		Theobroma cacao L.	SEF	10060	30/06/82	-0.5167	-76.4	1319801218	44251	30	6	1982	21255	0	1892	6179	27192	1149029	0.816607505	0.854238331	0.146636219	9	60	Napo province	Potential native area	U	0.017631001	0	0.001569412	0.005125474	0.022555736	0.953118377	0.006694886
139	GBIF	PRESERVED_SPECIMEN	HUSC	1143431615	SPECIES	Theobroma	cacao		Theobroma cacao L.	Marques, T.G.Q. & Marson, R.P.S.	12	30/05/07	-23.84964748	-46.27981485	0	44225	30	5	2007	626422	0	24440	49398	68039	436127	0.26391533	0.091576211	0.469974356	219	76	South American Atlantic coast	Unequivocal late introduction	G	0.520100031	0	0.020291824	0.041013728	0.05649081	0.362103608	0.061305551
140	GBIF	PRESERVED_SPECIMEN	HO	2430729733	SPECIES	Theobroma	cacao		Theobroma cacao L.	Buchanan, A.M.	10511	30/05/87	-12.581977	131.300968	0	44238	30	5	1987	584572	0	4320	16331	175702	386096	0.026323517	0.130341887	0.635245685	105	69	Oceania and Pacific islands	Unequivocal late introduction	F	0.500909581	0	0.003701733	0.01399375	0.150555988	0.330838948	0.017695483
142	GBIF	PRESERVED_SPECIMEN	U	2517045280	SPECIES	Theobroma	cacao		Theobroma cacao L.	Baker, C.F.	125	30/05/07	7.2698653	80.593833	2517045280	44208	30	5	1907	75146	0	12490	52959	298237	493076	0.559795743	0.615535259	0.23064615	141	55	Asia	Unequivocal late introduction	E	0.080636715	0	0.013402611	0.056828571	0.320028372	0.529103731	0.070231182
143	GBIF	PRESERVED_SPECIMEN	L	2516699514	SPECIES	Theobroma	cacao		Theobroma cacao L.	Heilbron, T.J. & Madari, P.	47	30/04/12	5.840667	-55.156167	2515128687	44209	30	4	2012	238710	0	2195	7912	38294	414508	0.363309786	0.766695857	0.615402794	229	56	Guianan Lowlands province	Potential early introduction	N	0.340227388	0	0.003128479	0.011276776	0.05457948	0.590787878	0.014405254
144	GBIF	PRESERVED_SPECIMEN	MG	2365707240	SPECIES	Theobroma	cacao		Theobroma cacao L.	Coelho-Ferreira, M.R. & Matos, S.A.	532	30/04/10	-3.684007162	-50.63142917	2365707240	44215	30	4	2010	35286	0	8599	23358	73234	900411	0.756387632	0.831557572	0.201715783	224	63	Xingu-Tapajós province	Potential early introduction	I	0.033899901	0	0.008261215	0.022440455	0.070357233	0.865041196	0.03070167
145	GBIF	PRESERVED_SPECIMEN	UESC	2350499902	SPECIES	Theobroma	cacao		Theobroma cacao L.	Pereira, T.N.S.	s.n.	30/04/96	-14.74616868	-39.19609923	0	44216	30	4	1996	140721	0	6661	25484	176828	855630	0.644052284	0.763287425	0.315930606	215	70	South American Atlantic coast	Unequivocal late introduction	G	0.116749521	0	0.005526315	0.021142863	0.146705782	0.709875519	0.026669178
146	GBIF	PRESERVED_SPECIMEN	F	1228203651	SPECIES	Theobroma	cacao		Theobroma cacao L.	Paredes, R.	754	30/04/92	2.541667	-74.183333	1123909212	44263	30	4	1992	16744	0	4448	20596	179279	984207	0.713247716	0.749163032	0.165046296	8	58	Imerí province	Potential early introduction	L	0.013892277	0	0.003690447	0.017088231	0.14874543	0.816583615	0.020778678
147	GBIF	PRESERVED_SPECIMEN	PSO	1099639728	SPECIES	Theobroma	cacao		Theobroma cacao L.	De-Benavides, O.	1839	30/04/79	2.98627	-76.51374	0	44222	30	4	1979	42281	0	9189	30115	116930	492551	0.633416899	0.712782443	0.22465369	9	58	Cauca province	Unequivocal early introduction	#N/A	0.061182289	0	0.013296849	0.043577603	0.169202363	0.712740896	0.056874452
148	GBIF	PRESERVED_SPECIMEN	US	2397717587	SPECIES	Theobroma	cacao		Theobroma cacao L.	Gentle, P.H.	3292	30/03/40	16.95	-88.4166667	2397717587	44218	30	3	1940	635394	0	4552	12416	43731	94151	-0.103012327	-0.25179857	0.407327815	19	48	Mesoamerica	Unequivocal early introduction	T	0.804047864	0	0.005760246	0.015711603	0.055338604	0.119141683	0.021471849
149	GBIF	PRESERVED_SPECIMEN	ESA	2459897516	SPECIES	Theobroma	cacao		Theobroma cacao L.	Djuragin, B. & Duarte, K.M.R.	s.n.	30/11/89	-22.7342864	-47.6480644	2459897516	44242	30	11	1989	39948	0	22490	60833	207085	875235	0.658914942	0.726366639	0.220872871	220	76	South American Atlantic coast	Unequivocal late introduction	G	0.033135616	0	0.018654751	0.050459069	0.171770526	0.725980038	0.069113821
150	GBIF	PRESERVED_SPECIMEN	UIS	1062309829	SPECIES	Theobroma	cacao		Theobroma cacao L.	Ramiro, A.	49	30/11/79	7.418422446	-73.59687808	0	44216	30	11	1979	49012	0	4633	19358	158867	973693	0.700395185	0.772315681	0.22018756	8	55	Magdalena province	Unequivocal early introduction	R	0.040654864	0	0.003843018	0.016057228	0.131778265	0.807666625	0.019900246
151	GBIF	PRESERVED_SPECIMEN	RB	1424167100	SPECIES	Theobroma	cacao	Theobroma cacao var. catongo	Theobroma cacao L.	Mattos-Silva, L.A. & Brito, H.S.	667	30/10/79	-17.016667	-39.55	1291651667	44260	30	10	1979	280378	0	10203	34271	151226	729503	0.439584443	0.681151271	0.529234408	215	72	South American Atlantic coast	Unequivocal late introduction	G	0.232566704	0	0.008463139	0.028426958	0.125438274	0.605104925	0.036890097
152	GBIF	PRESERVED_SPECIMEN	U	2517047428	SPECIES	Theobroma	cacao		Theobroma cacao L.	Prance, G.T.; et al.	8079	30/10/68	-7.2644795	-64.7953033	1930593789	44208	30	10	1968	23293	0	2341	9152	41646	1129148	0.811733233	0.862559259	0.183258002	233	65	Madeira province	Potential early introduction	J	0.019320991	0	0.001941804	0.007591367	0.034544369	0.93660147	0.009533171
153	GBIF	PRESERVED_SPECIMEN	US	1321177639	SUBSPECIES	Theobroma	cacao	Theobroma cacao subsp. shaerocarpa	Theobroma cacao L.	Smith, S.F.; et al.	1694	30/01/89	-12.8333	-69.3333	1321177639	44239	30	1	1989	27735	0	6088	21078	86842	1061707	0.780918522	0.854355395	0.186272617	2	69	Rondônia province	Potential early introduction	K	0.023046242	0	0.005058789	0.017514645	0.072160871	0.882219452	0.022573435
155	GBIF	PRESERVED_SPECIMEN	SPF	1226934159	SPECIES	Theobroma	cacao		Theobroma cacao L.	Scavone, O	s.n.	03/07/53	-23.64003513	-45.48831769	1226934159	44266	3	7	1953	962008	0	552	2611	10245	219074	0.129732656	-0.01510574	0.354234748	218	76	South American Atlantic coast	Unequivocal late introduction	G	0.80537133	0	0.000462122	0.00218587	0.008576882	0.183403796	0.002647992
156	GBIF	PRESERVED_SPECIMEN	ASE	2464818674	SPECIES	Theobroma	cacao		Theobroma cacao L.	Carmo, V.S.; et al.	303	03/06/14	-14.4316	-39.2158	0	44211	3	6	2014	99366	0	672	6660	152944	945299	0.673434088	0.814982414	0.340831112	215	70	South American Atlantic coast	Unequivocal late introduction	G	0.082465449	0	0.000557704	0.005527242	0.126930696	0.78451891	0.006084945
157	GBIF	PRESERVED_SPECIMEN	HUESB	2236798428	SPECIES	Theobroma	cacao		Theobroma cacao L.	Carmo, V.S.; et al.	311	03/06/14	-14.720556	-39.366111	2236798428	44242	3	6	2014	140721	0	6661	25484	176828	855630	0.644052284	0.763287425	0.315930606	216	70	South American Atlantic coast	Unequivocal late introduction	G	0.116749521	0	0.005526315	0.021142863	0.146705782	0.709875519	0.026669178
158	GBIF	PRESERVED_SPECIMEN	RB	2029277553	SPECIES	Theobroma	cacao		Theobroma cacao L.	Carmo, V.S.; et al.	307	03/06/14	-14.721111	-39.366111	2029277553	44244	3	6	2014	140721	0	6661	25484	176828	855630	0.644052284	0.763287425	0.315930606	216	70	South American Atlantic coast	Unequivocal late introduction	G	0.116749521	0	0.005526315	0.021142863	0.146705782	0.709875519	0.026669178
160	GBIF	PRESERVED_SPECIMEN	L	2517122577	SPECIES	Theobroma	cacao		Theobroma cacao L.	Heilbron, T.J. & Kertopawiro, A.	52	03/05/12	5.791667	-55.118333	2514960624	44208	3	5	2012	238710	0	2195	7912	38294	414508	0.363309786	0.766695857	0.615402794	229	56	Guianan Lowlands province	Potential early introduction	N	0.340227388	0	0.003128479	0.011276776	0.05457948	0.590787878	0.014405254
161	GBIF	PRESERVED_SPECIMEN	ALCB	1077226378	SPECIES	Theobroma	cacao		Theobroma cacao L.	Lima, S.T.C. & Queiroz, E.P.	74	03/05/07	-12.966667	-38.5	0	44238	3	5	2007	905067	0	11086	30513	75222	172690	0.093340697	-0.026521061	0.330414431	215	69	South American Atlantic coast	Unequivocal late introduction	G	0.757645796	0	0.009280265	0.025542911	0.062969517	0.14456151	0.034823176
162	GBIF	PRESERVED_SPECIMEN	MA	1936696974	SPECIES	Theobroma	cacao		Theobroma cacao L.	Guareco I, B.J. & Hinojoza, I.	32	03/05/94	-14.5	-66.6167	0	44245	3	5	1994	37056	0	8003	34332	146472	979728	0.737010294	0.843989134	0.214058514	233	70	Rondônia province	Potential early introduction	K	0.030736792	0	0.006638238	0.028477319	0.121493939	0.812653711	0.035115557
163	GBIF	PRESERVED_SPECIMEN	UIS	1062308802	SPECIES	Theobroma	cacao		Theobroma cacao L.	Gomez Martha, C.	992	03/05/79	7.47157	-73.34478	0	44235	3	5	1979	49012	0	4633	19358	158867	973693	0.700395185	0.772315681	0.22018756	8	55	Magdalena province	Unequivocal early introduction	R	0.040654864	0	0.003843018	0.016057228	0.131778265	0.807666625	0.019900246
164	GBIF	PRESERVED_SPECIMEN	NY	1931375146	SPECIES	Theobroma	cacao		Theobroma cacao L.	Fr√≥es, R.L.	20573	03/05/45	-3.471174	-68.935084	1931375146	44246	3	5	1945	52127	0	629	1963	10807	1140035	0.769521874	0.825992763	0.237709597	3	62	Imerí province	Potential early introduction	L	0.043238791	0	0.000521749	0.001628288	0.008964291	0.945646881	0.002150036
165	GBIF	PRESERVED_SPECIMEN	L	2517038543	SPECIES	Theobroma	cacao		Theobroma cacao L.	Heilbron, T.J.	24	03/04/12	5.8925	-55.050167	2517038543	44208	3	4	2012	445639	0	5382	16396	60224	654207	0.362025371	0.727558285	0.5670536	229	56	Guianan Lowlands province	Potential early introduction	N	0.37706964	0	0.004553885	0.013873188	0.050957484	0.553545803	0.018427074
166	GBIF	PRESERVED_SPECIMEN	B	2446663246	SPECIES	Theobroma	cacao		Theobroma cacao L.	Sandoval, E.	s.n.	03/03/97	13.81667	-89.933327	0	44215	3	3	1997	163193	0	5196	41045	489025	506120	0.474163523	0.548213601	0.363705118	19	50	Mesoamerica	Unequivocal early introduction	T	0.135477208	0	0.00431354	0.034074145	0.405971713	0.420163393	0.038387686
167	GBIF	PRESERVED_SPECIMEN	LAGU	1585322820	SPECIES	Theobroma	cacao		Theobroma cacao L.	Sandoval, E.	s.n.	03/03/97	13.81667	-89.93333	0	44260	3	3	1997	163193	0	5196	41045	489025	506120	0.474163523	0.548213601	0.363705118	19	50	Mesoamerica	Unequivocal early introduction	T	0.135477208	0	0.00431354	0.034074145	0.405971713	0.420163393	0.038387686
168	GBIF	PRESERVED_SPECIMEN	KU	2309461582	SPECIES	Theobroma	cacao		Theobroma cacao L.	Alfredo-Vazquez	s.n.	03/02/11	14.59	-92.26	0	44217	3	2	2011	507936	0	2991	16663	137346	540652	0.298245816	0.501045316	0.513379714	21	50	Mesoamerica	Unequivocal early introduction	T	0.421318062	0	0.002480947	0.013821471	0.113924492	0.448455028	0.016302418
169	GBIF	PRESERVED_SPECIMEN	US	1319547715	SPECIES	Theobroma	cacao		Theobroma cacao L.	Peterson, P.M. & Annable, C.R.	6575	03/02/89	9.4047951	-82.269193	1319547715	44270	3	2	1989	708851	0	5910	13859	28776	176792	0.068682671	-0.127516776	0.389385801	14	53	North America	Unequivocal late introduction	B	0.758788381	0	0.00632635	0.014835344	0.030803222	0.189246704	0.021161693
170	GBIF	PRESERVED_SPECIMEN	US	1319726346	SPECIES	Theobroma	cacao		Theobroma cacao L.	Cazalet, P.C.D. & Pennington, T.D.	7653	03/02/62	-2.340197	-77.45932	1319726346	44270	3	2	1962	11136	0	2194	5730	18014	296121	0.745708917	0.813031137	0.178819882	9	62	Napo province	Potential native area	U	0.03342187	0	0.006584733	0.017197137	0.054064437	0.888731824	0.023781869
171	GBIF	PRESERVED_SPECIMEN	COAH	1932876815	SPECIES	Theobroma	cacao		Theobroma cacao L.	Sanchez, M.; et al.	6338	03/10/97	-1.02	-71.55	1932876815	44223	3	10	1997	17363	0	3731	13392	43236	1123316	0.786618721	0.829936326	0.154646176	5	61	Imerí province	Potential early introduction	L	0.014456662	0	0.00310648	0.011150355	0.035998861	0.935287643	0.014256835
172	GBIF	PRESERVED_SPECIMEN	COL	1891005641	SPECIES	Theobroma	cacao		Theobroma cacao L.	Cogollo, A.	797	03/10/83	5.93572	-74.84932	1891005641	44249	3	10	1983	28236	0	3710	13044	275986	884611	0.685555121	0.736332417	0.187832974	9	56	Magdalena province	Unequivocal early introduction	R	0.023420956	0	0.003077339	0.010819626	0.228922508	0.733759571	0.013896965
173	GBIF	PRESERVED_SPECIMEN	US	1322633587	SPECIES	Theobroma	cacao		Theobroma cacao L.	Graham, J.G. & Vigo, J.S.	4421	29/07/07	-9.3536	-74.4769	1322084567	44230	29	7	2007	102159	0	11466	29519	70290	966988	0.7223173	0.852541745	0.279468936	6	66	Rondônia province	Potential early introduction	K	0.086544473	0	0.009713475	0.025007158	0.059546501	0.819188392	0.034720634
176	GBIF	PRESERVED_SPECIMEN	UEC	1234558896	SPECIES	Theobroma	cacao		Theobroma cacao L.	Pereira, JC; Costa, LC	s.n.	29/05/15	-22.783333	-47.1	1234558896	44266	29	5	2015	7415	0	7108	17003	56424	205357	0.651038536	0.713057697	0.214842047	219	76	South American Atlantic coast	Unequivocal late introduction	G	0.025280679	0	0.024233994	0.057969977	0.192371815	0.700143536	0.082203971
177	GBIF	PRESERVED_SPECIMEN	ASE	2464819573	SPECIES	Theobroma	cacao		Theobroma cacao L.	Carmo, V.S.; et al.	268	29/05/14	-14.431	-39.2213	0	44211	29	5	2014	99366	0	672	6660	152944	945299	0.673434088	0.814982414	0.340831112	215	70	South American Atlantic coast	Unequivocal late introduction	G	0.082465449	0	0.000557704	0.005527242	0.126930696	0.78451891	0.006084945
178	GBIF	PRESERVED_SPECIMEN	ASE	2464819120	SPECIES	Theobroma	cacao		Theobroma cacao L.	Carmo, V.S.; et al.	285	29/05/14	-14.437	-39.2151	0	44218	29	5	2014	99366	0	672	6660	152944	945299	0.673434088	0.814982414	0.340831112	215	70	South American Atlantic coast	Unequivocal late introduction	G	0.082465449	0	0.000557704	0.005527242	0.126930696	0.78451891	0.006084945
179	GBIF	PRESERVED_SPECIMEN	HUESB	2236798516	SPECIES	Theobroma	cacao		Theobroma cacao L.	Carmo, V.S.; et al.	283	29/05/14	-14.719444	-39.370278	0	44242	29	5	2014	140721	0	6661	25484	176828	855630	0.644052284	0.763287425	0.315930606	216	70	South American Atlantic coast	Unequivocal late introduction	G	0.116749521	0	0.005526315	0.021142863	0.146705782	0.709875519	0.026669178
180	GBIF	PRESERVED_SPECIMEN	UEC	1946084921	SPECIES	Theobroma	cacao		Theobroma cacao L.	Carmo, V.S.; et al.	272	29/05/14	-14.716944	-39.370278	0	44245	29	5	2014	140721	0	6661	25484	176828	855630	0.644052284	0.763287425	0.315930606	216	70	South American Atlantic coast	Unequivocal late introduction	G	0.116749521	0	0.005526315	0.021142863	0.146705782	0.709875519	0.026669178
181	GBIF	PRESERVED_SPECIMEN	HURB	1944965930	SPECIES	Theobroma	cacao		Theobroma cacao L.	Carmo, V.S.; et al.	289	29/05/14	-14.718611	-39.364167	0	44225	29	5	2014	140721	0	6661	25484	176828	855630	0.644052284	0.763287425	0.315930606	216	70	South American Atlantic coast	Unequivocal late introduction	G	0.116749521	0	0.005526315	0.021142863	0.146705782	0.709875519	0.026669178
182	GBIF	PRESERVED_SPECIMEN	FLAS	1457829669	SPECIES	Theobroma	cacao		Theobroma cacao L.	Ruhl, D.L.	2000	29/04/04	29.6446	-82.3459	1457829669	44259	29	4	2004	153368	0	11320	35436	214655	276715	0.360577286	0.522959739	0.478768668	17	39	North America	Unequivocal late introduction	B	0.221792235	0	0.016370352	0.051245564	0.310422072	0.400169777	0.067615916
183	GBIF	PRESERVED_SPECIMEN	NY	1929962016	SPECIES	Theobroma	cacao		Theobroma cacao L.	Grance, G.T. & Ramos, J.F.	21004	29/04/74	-3.105281127	-60.02620539	1929962016	44249	29	4	1974	152113	0	9983	27965	95764	796175	0.615719998	0.799432695	0.378651822	231	62	Imerí province	Potential early introduction	L	0.140585028	0	0.009226433	0.025845656	0.08850647	0.735836414	0.035072089
184	GBIF	PRESERVED_SPECIMEN	MFS	2595784134	SPECIES	Theobroma	cacao		Theobroma cacao L.	Sato, K.S.S.	47	29/12/11	-1.450364	-48.446503	0	44266	29	12	2011	331693	0	8572	27035	185859	652409	0.410442507	0.658553213	0.55760358	223	61	Pará province	Potential early introduction	H	0.275134211	0	0.007110341	0.022425114	0.154167164	0.54116317	0.029535455
187	GBIF	PRESERVED_SPECIMEN	DVPR	1801143659	SPECIES	Theobroma	cacao		Theobroma cacao L.	Godinho, J.P.	s.n.	29/01/12	-9.951979579	-62.95733633	0	44228	29	1	2012	11901	0	9259	33732	209674	941034	0.702530361	0.749167889	0.188651544	232	67	Madeira province	Potential early introduction	J	0.009871433	0	0.007679993	0.027979429	0.173916722	0.780552422	0.035659423
188	GBIF	PRESERVED_SPECIMEN	HPUJ	1098688143	SPECIES	Theobroma	cacao		Theobroma cacao L.	Manrique-Hoyos, N.	9	28/09/04	3.430914	-76.559999	0	44260	28	9	2004	42281	0	9189	30115	116930	492551	0.633416899	0.712782443	0.22465369	9	58	Cauca province	Unequivocal early introduction	#N/A	0.061182289	0	0.013296849	0.043577603	0.169202363	0.712740896	0.056874452
189	GBIF	PRESERVED_SPECIMEN	UADY	1893444358	SPECIES	Theobroma	cacao		Theobroma cacao L.	Disponible, N.O.	s.n.	28/09/91	20.541667	-89.108333	0	44221	28	9	1991	37865	0	15712	51227	355926	744873	0.598862952	0.643383622	0.175893466	20	46	Mesoamerica	Unequivocal early introduction	T	0.03140752	0	0.013032483	0.04249077	0.295226538	0.61784269	0.055523253
191	GBIF	PRESERVED_SPECIMEN	ESA	2459842318	SPECIES	Theobroma	cacao		Theobroma cacao L.	Flores, T.B.	1252	28/08/12	-18.44456738	-39.83376967	2459842318	44263	28	8	2012	960006	0	9396	24988	67156	143083	-0.086640536	-0.164948449	0.406078289	215	73	South American Atlantic coast	Unequivocal late introduction	G	0.796930839	0	0.007799912	0.020743316	0.055748284	0.118777649	0.028543228
192	GBIF	PRESERVED_SPECIMEN	FMB	1707552542	SPECIES	Theobroma	cacao		Theobroma cacao L.	Barbosa, C.	5277-A	28/08/88	2.583333	-74.116667	1707552542	44259	28	8	1988	16744	0	4448	20596	179279	984207	0.713247716	0.749163032	0.165046296	7	58	Imerí province	Potential early introduction	L	0.013892277	0	0.003690447	0.017088231	0.14874543	0.816583615	0.020778678
193	GBIF	PRESERVED_SPECIMEN	COAH	768772737	SPECIES	Theobroma	cacao		Theobroma cacao L.	Castro, F. & Navarrete, D.A.	5123	28/07/08	2.32	-74.2	768772737	44216	28	7	2008	16744	0	4448	20596	179279	984207	0.713247716	0.749163032	0.165046296	7	58	Imerí province	Potential early introduction	L	0.013892277	0	0.003690447	0.017088231	0.14874543	0.816583615	0.020778678
194	GBIF	PRESERVED_SPECIMEN	MG	1314851033	SPECIES	Theobroma	cacao		Theobroma cacao L.	Balslev, H. & Asanza, E.	4357	28/07/83	-0.083333	-76.166667	1314851033	44235	28	7	1983	14693	0	2767	12585	51748	1123797	0.801691147	0.845039845	0.14658904	9	60	Napo province	Potential native area	U	0.012187394	0	0.002295142	0.010438872	0.042923382	0.93215521	0.012734014
195	GBIF	PRESERVED_SPECIMEN	AAU	47855341	SPECIES	Theobroma	cacao		Theobroma cacao L.	Balslev, H.	s.n.	28/07/83	-1.083	-76.166	0	44260	28	7	1983	3347	0	1225	3801	10896	345811	0.825517456	0.859146357	0.127593722	8	61	Napo province	Potential native area	U	0.009167854	0	0.003355429	0.010411417	0.029845513	0.947219787	0.013766846
196	GBIF	PRESERVED_SPECIMEN	EAFM	1095267063	SPECIES	Theobroma	cacao		Theobroma cacao L.	Junqueira, A.B. & Souza, J.R.	268	28/06/07	-6.406172	-62.101467	0	44252	28	6	2007	25022	0	4293	14636	52046	1109592	0.801346117	0.859342217	0.185050831	231	64	Madeira province	Potential early introduction	J	0.020755	0	0.003560915	0.012140124	0.0431706	0.920373361	0.015701039
197	GBIF	PRESERVED_SPECIMEN	HURB	1944965915	SPECIES	Theobroma	cacao		Theobroma cacao L.	Carmo, V.S.; et al.	141	28/04/14	-14.716944	-39.367778	0	44225	28	4	2014	140721	0	6661	25484	176828	855630	0.644052284	0.763287425	0.315930606	216	70	South American Atlantic coast	Unequivocal late introduction	G	0.116749521	0	0.005526315	0.021142863	0.146705782	0.709875519	0.026669178
198	GBIF	PRESERVED_SPECIMEN	HUA	1123913779	SPECIES	Theobroma	cacao		Theobroma cacao L.	Mejia, R.	1	28/04/78	5.723972	-75.687972	1123913779	44225	28	4	1978	28877	0	5996	16211	72165	976314	0.736397694	0.790030241	0.170989208	9	56	Cauca province	Unequivocal early introduction	#N/A	0.026262251	0	0.005453075	0.01474313	0.065630619	0.887910925	0.020196205
199	GBIF	PRESERVED_SPECIMEN	US	1322528393	SPECIES	Theobroma	cacao		Theobroma cacao L.	Caity, G.	257	28/03/95	-14.5	-66.62	1322528393	44230	28	3	1995	37056	0	8003	34332	146472	979728	0.737010294	0.843989134	0.214058514	233	70	Rondônia province	Potential early introduction	K	0.030736792	0	0.006638238	0.028477319	0.121493939	0.812653711	0.035115557
201	GBIF	PRESERVED_SPECIMEN	US	1320314770	SPECIES	Theobroma	cacao		Theobroma cacao L.	Jaramillo, J.L. & Grijalva, E.	11499	28/02/90	-0.6	-76.0167	1320314770	44270	28	2	1990	21255	0	1892	6179	27192	1149029	0.816607505	0.854238331	0.146636219	8	60	Napo province	Potential native area	U	0.017631001	0	0.001569412	0.005125474	0.022555736	0.953118377	0.006694886
202	GBIF	PRESERVED_SPECIMEN	HUA	1123900312	SPECIES	Theobroma	cacao		Theobroma cacao L.	Hoyos, S.	156	28/02/83	6.048421	-75.001645	1123900312	44225	28	2	1983	34680	0	5524	15027	83911	1066426	0.737615009	0.791557491	0.180125394	9	56	Magdalena province	Unequivocal early introduction	R	0.028766523	0	0.004582073	0.012464664	0.069602876	0.884583864	0.017046736
203	GBIF	PRESERVED_SPECIMEN	US	1318162277	SPECIES	Theobroma	cacao		Theobroma cacao L.	Kellerman, W.A.	4843	28/02/05	14.52727	-91.52917	1318195183	44270	28	2	1905	62508	0	14304	80981	354946	548323	0.567759871	0.612281531	0.235850223	20	50	Mesoamerica	Unequivocal early introduction	T	0.058910789	0	0.013480833	0.076320705	0.334519566	0.516768106	0.089801538
204	GBIF	PRESERVED_SPECIMEN	MEXU	1894542147	SPECIES	Theobroma	cacao		Theobroma cacao L.	D. Alvarez, M.; et al.	s.n.	28/11/02	16.664167	-91.016389	0	44222	28	11	2002	10313	0	2743	8239	39231	391366	0.735226204	0.808071285	0.175133834	20	49	Mesoamerica	Unequivocal early introduction	T	0.022821825	0	0.006070034	0.018232232	0.086814991	0.866060917	0.024302267
205	GBIF	PRESERVED_SPECIMEN	COAH	1147297318	SPECIES	Theobroma	cacao		Theobroma cacao L.	L√≥pez, R.C.; et al.	2275	28/11/96	2.44	-72.94	1147297318	44223	28	11	1996	6343	0	322	1536	71873	1125524	0.7592053	0.802800477	0.108903987	7	58	Imerí province	Potential early introduction	L	0.005261289	0	0.000267087	0.001274057	0.059616058	0.933581509	0.001541144
206	GBIF	PRESERVED_SPECIMEN	L	2514335930	SPECIES	Theobroma	cacao		Theobroma cacao L.	Ambriansyah, A. & Arifin, Z.	301	28/11/91	0.5386586	116.419389	2514335930	44266	28	11	1991	21809	0	7087	25752	106334	950228	0.739471828	0.809774637	0.17837082	117	60	Asia	Unequivocal late introduction	E	0.019626353	0	0.006377732	0.023174737	0.095692083	0.855129094	0.02955247
207	GBIF	PRESERVED_SPECIMEN	INB	1253698499	SPECIES	Theobroma	cacao		Theobroma cacao L.	Robles, R.	s.n.	28/11/87	10.516667	-83.5	0	44222	28	11	1987	218932	0	10788	29320	87309	859186	0.598333731	0.801474214	0.394370574	15	53	North America	Unequivocal late introduction	B	0.181605677	0	0.008948724	0.024321152	0.072423447	0.712701	0.033269876
208	GBIF	PRESERVED_SPECIMEN	CR	46083303	SUBSPECIES	Theobroma	cacao	Theobroma cacao. subsp. cacao	Theobroma cacao subsp. cacao	Robles, R.	s.n.	28/11/87	10.51	-83.5	0	44216	28	11	1987	218932	0	10788	29320	87309	859186	0.598333731	0.801474214	0.394370574	15	53	North America	Unequivocal late introduction	B	0.181605677	0	0.008948724	0.024321152	0.072423447	0.712701	0.033269876
209	GBIF	PRESERVED_SPECIMEN	FMB	1707549582	SPECIES	Theobroma	cacao		Theobroma cacao L.	Pipoly, J. & Murillo, J.	15453	28/10/91	-3.39959	-70.14192	1707549582	44260	28	10	1991	10802	0	3856	13197	45089	802417	0.774487808	0.824503303	0.15030002	4	62	Imerí province	Potential early introduction	L	0.012340052	0	0.00440504	0.015076066	0.051509035	0.916669808	0.019481106
210	GBIF	PRESERVED_SPECIMEN	ASU	2270581529	SPECIES	Theobroma	cacao		Theobroma cacao L.	Jerome V. Ward	29	28/10/82	5.32515	163.00896	2270581529	44242	28	10	1982	752833	0	1392	2802	4717	7572	-0.024100575	-0.036496349	0.102702508	87	56	Oceania and Pacific islands	Unequivocal late introduction	F	0.978574474	0	0.0018094	0.003642196	0.006131421	0.009842509	0.005451596
212	GBIF	PRESERVED_SPECIMEN	NY	1930841669	SPECIES	Theobroma	cacao		Theobroma cacao L.	Zanoni, T.; et al.	10444	28/01/81	19.05	-70.27	1929204763	44246	29	1	1981	116528	0	5105	21915	53567	286582	0.485244532	0.710761786	0.45031327	7	47	Antilles	Unequivocal late introduction	A	0.240911149	0	0.010554128	0.045307289	0.11074495	0.592482484	0.055861417
213	GBIF	PRESERVED_SPECIMEN	NY	1929874436	SPECIES	Theobroma	cacao		Theobroma cacao L.	Prance, G.T.; et al.	7588	27/09/68	-9.07	-68.62	1929874436	44249	27	9	1968	15220	0	3651	10134	42613	1071969	0.802087929	0.847659826	0.138518048	2	66	Rondônia province	Potential early introduction	K	0.013309001	0	0.003192586	0.008861591	0.037262578	0.937374244	0.012054177
214	GBIF	PRESERVED_SPECIMEN	CEN	1095228896	SPECIES	Theobroma	cacao		Theobroma cacao L.	Ferreira, E.M.; et al.	69	27/08/02	-16.387777	-39.183611	1095228896	44252	27	8	2002	280378	0	10203	34271	151226	729503	0.439584443	0.681151271	0.529234408	215	71	South American Atlantic coast	Unequivocal late introduction	G	0.232566704	0	0.008463139	0.028426958	0.125438274	0.605104925	0.036890097
215	GBIF	PRESERVED_SPECIMEN	INB	1253614707	SPECIES	Theobroma	cacao		Theobroma cacao L.	Quiros, J.F.M.	s.n.	27/08/92	9.699722	-84.384444	0	44222	27	8	1992	825917	0	2208	5408	39722	236017	0.018597712	-0.193548381	0.436969101	15	53	Puntarenas-Chiriquí province	Unequivocal early introduction	S	0.744557692	0	0.001990495	0.00487527	0.035809071	0.212767473	0.006865764
216	GBIF	PRESERVED_SPECIMEN	HCF	1077467987	SPECIES	Theobroma	cacao		Theobroma cacao L.	Nobre, J.K.	s.n.	27/07/05	-25.59104118	-48.58904441	0	44216	27	7	2005	677088	0	8412	23392	52176	444321	0.226524391	-0.037383176	0.512698829	220	78	South American Atlantic coast	Unequivocal late introduction	G	0.561717421	0	0.00697866	0.019406183	0.043285612	0.368612124	0.026384843
217	GBIF	PRESERVED_SPECIMEN	INB	1253636023	SPECIES	Theobroma	cacao		Theobroma cacao L.	Grayum, M.H.	s.n.	27/07/95	9.766667	-84.566667	0	44222	27	7	1995	825917	0	2208	5408	39722	236017	0.018597712	-0.193548381	0.436969101	15	53	Puntarenas-Chiriquí province	Unequivocal early introduction	S	0.744557692	0	0.001990495	0.00487527	0.035809071	0.212767473	0.006865764
218	GBIF	PRESERVED_SPECIMEN	MO	1260452697	SPECIES	Theobroma	cacao		Theobroma cacao L.	Krukoff, B.A.	10661	27/07/39	-14.933333	-64.916667	2515443819	44169	27	7	1939	36153	0	4245	14258	84165	601663	0.698472775	0.777310908	0.242267959	232	70	Rondônia province	Potential early introduction	K	0.048823472	0	0.005732737	0.019254974	0.113662145	0.812526672	0.024987711
220	GBIF	PRESERVED_SPECIMEN	US	2284225496	SPECIES	Theobroma	cacao		Theobroma cacao L.	Hill, S.R.; et al.	12855	27/06/83	-4.0333	-59.1	1319837665	44224	27	6	1983	96367	0	5421	14925	59455	1028979	0.716106663	0.83954519	0.302324877	230	63	Madeira province	Potential early introduction	J	0.079962859	0	0.004498206	0.012384381	0.049334231	0.853820322	0.016882588
221	GBIF	PRESERVED_SPECIMEN	NY	1931133620	SPECIES	Theobroma	cacao		Theobroma cacao L.	Hill, S.R.; et al.	12855	27/06/83	-4.033333	-59.1	1319837665	44224	27	6	1983	96367	0	5421	14925	59455	1028979	0.716106663	0.83954519	0.302324877	230	63	Madeira province	Potential early introduction	J	0.079962859	0	0.004498206	0.012384381	0.049334231	0.853820322	0.016882588
222	GBIF	PRESERVED_SPECIMEN	MO	1258381086	SPECIES	Theobroma	cacao		Theobroma cacao L.	Hill, S.R.; et al.	12855	27/06/83	-4.03333	-59.1	1319837665	44169	27	6	1983	96367	0	5421	14925	59455	1028979	0.716106663	0.83954519	0.302324877	230	63	Madeira province	Potential early introduction	J	0.079962859	0	0.004498206	0.012384381	0.049334231	0.853820322	0.016882588
223	GBIF	PRESERVED_SPECIMEN	BHCB	1087567158	SPECIES	Theobroma	cacao		Theobroma cacao L.	Pinheiro, L.M.	s.n.	27/05/80	-1.240743738	-48.45940304	0	44238	27	5	1980	331693	0	8572	27035	185859	652409	0.410442507	0.658553213	0.55760358	223	61	Pará province	Potential early introduction	H	0.275134211	0	0.007110341	0.022425114	0.154167164	0.54116317	0.029535455
225	GBIF	PRESERVED_SPECIMEN	COL	1934712206	SPECIES	Theobroma	cacao		Theobroma cacao L.	Pardo, C.I.O.	3265	27/03/00	5.940038599	-74.48137133	1934712206	44263	27	3	2000	28236	0	3710	13044	275986	884611	0.685555121	0.736332417	0.187832974	8	56	Magdalena province	Unequivocal early introduction	R	0.023420956	0	0.003077339	0.010819626	0.228922508	0.733759571	0.013896965
226	GBIF	PRESERVED_SPECIMEN	US	1319673984	SPECIES	Theobroma	cacao		Theobroma cacao L.	Hage, J.L.; et al.	232	27/03/79	-14.7855812	-39.2230747	0	44270	27	3	1979	140721	0	6661	25484	176828	855630	0.644052284	0.763287425	0.315930606	215	70	South American Atlantic coast	Unequivocal late introduction	G	0.116749521	0	0.005526315	0.021142863	0.146705782	0.709875519	0.026669178
227	GBIF	PRESERVED_SPECIMEN	US	2397730176	SPECIES	Theobroma	cacao		Theobroma cacao L.	Little, E.L.	25336	27/03/71	14.38	-83.88	2397730176	44221	27	3	1971	214362	0	12122	35639	267644	305278	0.355035092	0.512181282	0.47041471	16	50	Mesoamerica	Unequivocal early introduction	T	0.256707124	0	0.014516583	0.042679137	0.320514463	0.365582693	0.05719572
228	GBIF	PRESERVED_SPECIMEN	EFC	2427813182	SPECIES	Theobroma	cacao		Theobroma cacao L.	Souza, I.	351	27/12/18	-7.942574	-35.015655	0	44215	27	12	2018	149886	0	8492	36351	218667	792196	0.577496698	0.701021641	0.345803999	214	65	South American Atlantic coast	Unequivocal late introduction	G	0.124325643	0	0.007043842	0.030151992	0.181377282	0.657101242	0.037195834
229	GBIF	PRESERVED_SPECIMEN	INB	1253676468	SPECIES	Theobroma	cacao		Theobroma cacao L.	Villalobos, N.A.Z. & Gonzalez, J.	s.n.	27/11/99	9.584722	-82.611111	0	44222	27	11	1999	244911	0	1009	3099	10478	291915	0.425598926	0.757852763	0.473106928	14	53	North America	Unequivocal late introduction	B	0.444152467	0	0.001829848	0.005620117	0.019002125	0.529395443	0.007449965
230	GBIF	PRESERVED_SPECIMEN	US	1456359637	FORM	Theobroma	cacao	Theobroma cacao f. pentagonum	Theobroma cacao L.	Ramos, C.H.A.; et al.	428	27/10/08	-14.1672	-39.7222	1456359637	44223	27	10	2008	99366	0	672	6660	152944	945299	0.673434088	0.814982414	0.340831112	216	70	South American Atlantic coast	Unequivocal late introduction	G	0.082465449	0	0.000557704	0.005527242	0.126930696	0.78451891	0.006084945
231	GBIF	PRESERVED_SPECIMEN	ALCB	1077230309	SPECIES	Theobroma	cacao		Theobroma cacao L.	Ramos, C.H.A.; et al.	428	27/10/08	-14.167222	-39.722222	1456359637	44223	27	10	2008	99366	0	672	6660	152944	945299	0.673434088	0.814982414	0.340831112	216	70	South American Atlantic coast	Unequivocal late introduction	G	0.082465449	0	0.000557704	0.005527242	0.126930696	0.78451891	0.006084945
232	GBIF	PRESERVED_SPECIMEN	US	1318527539	SPECIES	Theobroma	cacao		Theobroma cacao L.	Freire, B. & Naranjo, D.	444	27/01/04	-1.0425	-76.8864	1318527539	44270	27	1	2004	452	0	238	768	3288	116266	0.826047431	0.854204476	0.102903115	9	61	Napo province	Potential native area	U	0.003735167	0	0.001966747	0.006346478	0.027170859	0.960780749	0.008313225
233	GBIF	PRESERVED_SPECIMEN	US	2284274049	SPECIES	Theobroma	cacao		Theobroma cacao L.	Leonard, E.C.	9252	27/01/26	19.597747	-72.470704	1930255009	44209	27	1	1926	111101	0	4808	31075	297174	399719	0.481579343	0.584637284	0.388234422	9	46	Antilles	Unequivocal late introduction	A	0.131655443	0	0.005697513	0.036824087	0.352153217	0.473669741	0.0425216
234	GBIF	PRESERVED_SPECIMEN	US	1321276214	SPECIES	Theobroma	cacao		Theobroma cacao L.	Graham, J.G.	2790	26/08/03	-7.9444	-73.8936	1321276214	44239	26	8	2003	3	0	3	38	412	627967	0.865406182	0.866813004	0.017726574	6	65	Rondônia province	Potential early introduction	K	4.77E-06	0	4.77E-06	6.05E-05	0.000655609	0.999274374	6.52427E-05
235	GBIF	PRESERVED_SPECIMEN	US	1318758344	SPECIES	Theobroma	cacao		Theobroma cacao L.	Mhoro, B.	167	26/07/00	-7.17	37.75	0	44270	26	7	2000	51149	0	10169	37960	381270	702161	0.594176465	0.637044609	0.18423148	167	65	Africa	Unequivocal late introduction	D	0.043247325	0	0.008598058	0.032095807	0.322370084	0.593688726	0.040693865
236	GBIF	PRESERVED_SPECIMEN	UJAT	1894548644	SPECIES	Theobroma	cacao		Theobroma cacao L.	A. Sol, S.	s.n.	26/07/90	17.378333	-91.368333	0	44235	26	7	1990	47458	0	8085	24995	155627	969407	0.68152153	0.740967989	0.208388747	21	48	Mesoamerica	Unequivocal early introduction	T	0.039365546	0	0.00670636	0.020732897	0.12908976	0.804105437	0.027439257
238	GBIF	PRESERVED_SPECIMEN	INB	1253777404	SPECIES	Theobroma	cacao		Theobroma cacao L.	Gonzalez, J.	s.n.	26/04/03	8.842778	-83.476111	0	44222	26	4	2003	573869	0	10540	26216	68443	526290	0.316018157	0.261051312	0.473064075	14	54	Puntarenas-Chiriquí province	Unequivocal early introduction	S	0.476098387	0	0.00874429	0.021749555	0.0567823	0.436625467	0.030493845
239	GBIF	PRESERVED_SPECIMEN	US	2284280115	SPECIES	Theobroma	cacao		Theobroma cacao L.	Cid-Ferreira, C.A.; et al.	7236	26/04/86	-1.6614042	-68.1556594	2284280115	44223	26	4	1986	22448	0	1503	6142	70118	1105385	0.782787249	0.841647863	0.187491298	3	61	Imerí province	Potential early introduction	L	0.018619836	0	0.001246686	0.005094576	0.058160445	0.916878457	0.006341262
240	GBIF	PRESERVED_SPECIMEN	WAG	2626720353	SPECIES	Theobroma	cacao		Theobroma cacao L.	Pilz, G.E.	s.n	26/04/77	6.386557	9.094785	2626720353	44204	26	4	1977	17857	0	14229	307233	597878	268395	0.43157535	0.379292265	0.18204282	187	56	Africa	Unequivocal late introduction	D	0.01481181	0	0.0118025	0.254839946	0.495920676	0.222625067	0.266642446
241	GBIF	PRESERVED_SPECIMEN	WAG	2626698345	SPECIES	Theobroma	cacao		Theobroma cacao L.	Ako√®gninou, A.; et al.	s.n	26/03/98	6.733333	2.133333	2626698345	44204	26	3	1998	75585	0	5192	30332	365570	156235	0.450128601	0.497766092	0.207313332	192	55	Africa	Unequivocal late introduction	D	0.119423808	0	0.008203326	0.047924363	0.57759822	0.246850283	0.056127689
242	GBIF	PRESERVED_SPECIMEN	LSF	1914122720	SPECIES	Theobroma	cacao		Theobroma cacao L.	Akouegninou A, A.P.H.	s.n.	26/03/98	6.73	2.13	0	44251	26	3	1998	75585	0	5192	30332	365570	156235	0.450128601	0.497766092	0.207313332	192	55	Africa	Unequivocal late introduction	D	0.119423808	0	0.008203326	0.047924363	0.57759822	0.246850283	0.056127689
243	GBIF	PRESERVED_SPECIMEN	INPA	1042570850	SPECIES	Theobroma	cacao		Theobroma cacao L.	Miranda, I.S.	1728	26/11/97	-9.910166667	-69.53425	1042570850	44537	26	11	1997	25030	0	11846	39851	125363	949161	0.752388906	0.852923453	0.205567786	3	67	Rondônia province	Potential early introduction	K	0.021741566	0	0.010289676	0.034615388	0.108892848	0.824460522	0.044905064
244	GBIF	PRESERVED_SPECIMEN	FTG	123015656	SPECIES	Theobroma	cacao		Theobroma cacao L.	Frances, A.L.	s.n.	26/10/02	8.849722	-83.104167	0	44260	26	10	2002	547859	0	7444	19201	55823	574428	0.294851329	0.481288642	0.559418581	14	54	Puntarenas-Chiriquí province	Unequivocal early introduction	S	0.454747231	0	0.00617885	0.01593768	0.046335562	0.476800677	0.02211653
245	GBIF	PRESERVED_SPECIMEN	CR	46084219	SUBSPECIES	Theobroma	cacao	Theobroma cacao. subsp. cacao	Theobroma cacao subsp. cacao	Frances, A.	s.n.	26/10/02	8.84	-83.1	0	44216	26	10	2002	547859	0	7444	19201	55823	574428	0.294851329	0.481288642	0.559418581	14	54	Puntarenas-Chiriquí province	Unequivocal early introduction	S	0.454747231	0	0.00617885	0.01593768	0.046335562	0.476800677	0.02211653
246	GBIF	PRESERVED_SPECIMEN	MEXU	1895556066	SPECIES	Theobroma	cacao		Theobroma cacao L.	Salas, E.M.M.	s.n.	26/10/84	16.585833	-90.6725	0	44204	26	10	1984	8077	0	1528	7163	295668	796598	0.679489238	0.707317054	0.154849186	20	49	Mesoamerica	Unequivocal early introduction	T	0.007282915	0	0.001377776	0.006458774	0.266599581	0.718280954	0.00783655
249	GBIF	PRESERVED_SPECIMEN	MO	1259171576	SPECIES	Theobroma	cacao		Theobroma cacao L.	Pipoly, J.J.; et al.	12346	25/09/90	-3.5	-72.83333	1259171576	44169	25	9	1990	22660	0	283	975	5074	664740	0.800708203	0.84028393	0.184667222	6	62	Imerí province	Potential early introduction	L	0.032663911	0	0.000407939	0.001405442	0.007314064	0.958208645	0.00181338
250	GBIF	PRESERVED_SPECIMEN	MG	1314851985	SPECIES	Theobroma	cacao		Theobroma cacao L.	Maciel, U.N. & Rosario, C.S.	1383	25/09/84	-11.16614922	-61.87786126	1314851985	44235	25	9	1984	13489	0	5333	18447	63221	256373	0.647815014	0.716035366	0.216353591	231	68	Madeira province	Potential early introduction	J	0.037798819	0	0.01494411	0.051692106	0.177157621	0.718407344	0.066636216
251	GBIF	PRESERVED_SPECIMEN	US	2397751603	SPECIES	Theobroma	cacao	Theobroma cacao L. f. spontanea	Theobroma cacao L.	Ducke, A.	s.n.	25/09/42	-4.405352	-69.925712	2397751603	44221	25	9	1942	52290	0	8608	29641	105817	608931	0.689182291	0.8391155	0.292874337	4	63	Madeira province	Potential early introduction	J	0.064933372	0	0.010689357	0.036807995	0.131402841	0.756166435	0.047497352
252	GBIF	PRESERVED_SPECIMEN	HST	2452742996	SPECIES	Theobroma	cacao		Theobroma cacao L.	Mulatinho, R.B. & G.l.novelino, L.F.S.	s.n.	25/08/99	-8.004503	-34.947136	0	44215	25	8	1999	149886	0	8492	36351	218667	792196	0.577496698	0.701021641	0.345803999	214	65	South American Atlantic coast	Unequivocal late introduction	G	0.124325643	0	0.007043842	0.030151992	0.181377282	0.657101242	0.037195834
253	GBIF	PRESERVED_SPECIMEN	DAV	2626949915	SPECIES	Theobroma	cacao		Theobroma cacao L.	Brewer, S.W.	82	25/07/96	16.55	-88.716667	0	44204	25	7	1996	207148	0	6614	18325	81434	451659	0.527916175	0.748080432	0.39309757	19	49	Mesoamerica	Unequivocal early introduction	T	0.270718001	0	0.008643718	0.023948613	0.106424632	0.590265036	0.032592331
254	GBIF	PRESERVED_SPECIMEN	UJAT	1894548604	SPECIES	Theobroma	cacao		Theobroma cacao L.	G. Ortiz, G.	s.n.	25/07/84	17.536667	-91.655833	0	44235	25	7	1984	47458	0	8085	24995	155627	969407	0.68152153	0.740967989	0.208388747	21	48	Mesoamerica	Unequivocal early introduction	T	0.039365546	0	0.00670636	0.020732897	0.12908976	0.804105437	0.027439257
255	GBIF	PRESERVED_SPECIMEN	US	1318625365	SPECIES	Theobroma	cacao		Theobroma cacao L.	Croizat, L.C.M.	366	25/07/51	2.7500102	-65.2333403	1228424311	44256	25	7	1951	8567	0	1117	3063	14082	1178773	0.866215213	0.888030887	0.111567872	2	58	Imerí province	Potential early introduction	L	0.007105994	0	0.000926508	0.002540639	0.011680472	0.977746387	0.003467148
256	GBIF	PRESERVED_SPECIMEN	NY	1929333231	SPECIES	Theobroma	cacao		Theobroma cacao L.	Balee, W.L.	3487	25/06/87	-3.12	-46.08	0	44244	25	6	1987	26586	0	9917	32718	120128	1016249	0.757025963	0.85561344	0.19778552	222	62	Pará province	Potential early introduction	H	0.022052127	0	0.008225793	0.027138399	0.099641837	0.842941843	0.035364193
257	GBIF	PRESERVED_SPECIMEN	MEXU	1895556022	SPECIES	Theobroma	cacao		Theobroma cacao L.	Shilom-Ton, A.	s.n.	25/06/84	16.1425	-91.958611	0	44222	25	6	1984	26514	0	5859	36881	329128	804608	0.660061219	0.72313571	0.201397626	21	49	Mesoamerica	Unequivocal early introduction	T	0.022040083	0	0.004870365	0.030657778	0.273591634	0.66884014	0.035528142
258	GBIF	PRESERVED_SPECIMEN	CR	46083205	SUBSPECIES	Theobroma	cacao	Theobroma cacao. subsp. cacao	Theobroma cacao subsp. cacao	Leon, J.	s.n.	25/06/82	16.6464566	-91.23743798	0	44216	25	6	1982	39288	0	7254	23178	83603	1052244	0.749618029	0.825641036	0.189610444	20	49	Mesoamerica	Unequivocal early introduction	T	0.032588815	0	0.006017086	0.019225808	0.069347452	0.872820839	0.025242894
259	GBIF	PRESERVED_SPECIMEN	KU	2307468960	SPECIES	Theobroma	cacao		Theobroma cacao L.	Inifap	s.n.	25/05/11	16.26	-90.44	0	44217	25	5	2011	39932	0	10557	29724	116521	1008859	0.736093256	0.819421887	0.202613617	20	49	Mesoamerica	Unequivocal early introduction	T	0.033122289	0	0.008756687	0.024655087	0.096650362	0.836815575	0.033411773
260	GBIF	PRESERVED_SPECIMEN	KU	2307288735	SPECIES	Theobroma	cacao		Theobroma cacao L.	Inifap	s.n.	25/05/11	16.15	-90.51	0	44217	25	5	2011	39932	0	10557	29724	116521	1008859	0.736093256	0.819421887	0.202613617	20	49	Mesoamerica	Unequivocal early introduction	T	0.033122289	0	0.008756687	0.024655087	0.096650362	0.836815575	0.033411773
261	GBIF	PRESERVED_SPECIMEN	KU	2305905876	SPECIES	Theobroma	cacao		Theobroma cacao L.	Inifap	s.n.	25/05/11	20.33	-88.08	0	44217	25	5	2011	435	0	309	2681	60243	1141935	0.759882133	0.782736361	0.088506794	19	46	Mesoamerica	Unequivocal early introduction	T	0.000360815	0	0.000256303	0.002223783	0.049969186	0.947189912	0.002480087
262	GBIF	PRESERVED_SPECIMEN	KU	2305290233	SPECIES	Theobroma	cacao		Theobroma cacao L.	Inifap	s.n.	25/05/11	20.32	-88.5	0	44217	25	5	2011	435	0	309	2681	60243	1141935	0.759882133	0.782736361	0.088506794	19	46	Mesoamerica	Unequivocal early introduction	T	0.000360815	0	0.000256303	0.002223783	0.049969186	0.947189912	0.002480087
263	GBIF	PRESERVED_SPECIMEN	NY	1928340435	SPECIES	Theobroma	cacao		Theobroma cacao L.	Santos, A.A.; et al.	3331	25/05/11	-9.576666667	-64.90694444	1424452476	44116	25	5	2011	24663	0	1446	8105	67946	1103426	0.765390724	0.822417706	0.173971524	233	67	Madeira province	Potential early introduction	J	0.020457271	0	0.001199417	0.006722872	0.056359314	0.915261126	0.007922288
264	GBIF	PRESERVED_SPECIMEN	USF	2235660015	SPECIES	Theobroma	cacao		Theobroma cacao L.	D. LeDoux	2490	25/05/79	21.2593926	-98.7881496	2235660015	44242	25	5	1979	54590	0	12282	35074	182174	921474	0.675862336	0.746379256	0.208061073	26	45	Mesoamerica	Unequivocal early introduction	T	0.045280584	0	0.010187509	0.029092713	0.151107255	0.764331939	0.039280222
265	GBIF	PRESERVED_SPECIMEN	ENCB	1896072643	SPECIES	Theobroma	cacao		Theobroma cacao L.	Doux, D.L.	s.n.	25/05/79	21.245278	-98.795	0	44228	25	5	1979	54590	0	12282	35074	182174	921474	0.675862336	0.746379256	0.208061073	26	45	Mesoamerica	Unequivocal early introduction	T	0.045280584	0	0.010187509	0.029092713	0.151107255	0.764331939	0.039280222
266	GBIF	PRESERVED_SPECIMEN	P	694272842	SPECIES	Theobroma	cacao		Theobroma cacao L.	MacKee, H.S.	196	25/05/70	-21.52778	165.895	694272842	44263	25	5	1970	556770	0	4317	12673	75115	543271	0.329697447	0.436810136	0.487824456	82	75	Oceania and Pacific islands	Unequivocal late introduction	F	0.467031723	0	0.003621201	0.010630409	0.063008222	0.455708445	0.01425161
267	GBIF	PRESERVED_SPECIMEN	XAL	2629518435	SPECIES	Theobroma	cacao		Theobroma cacao L.	Gonzalez-Espinosa, M. & Quintana-Ascencio, P.F.	s.n.	25/04/88	16.466667	-90.716667	0	44204	25	4	1988	8077	0	1528	7163	295668	796598	0.679489238	0.707317054	0.154849186	20	49	Mesoamerica	Unequivocal early introduction	T	0.007282915	0	0.001377776	0.006458774	0.266599581	0.718280954	0.00783655
268	GBIF	PRESERVED_SPECIMEN	CHIP	1895147583	SPECIES	Theobroma	cacao		Theobroma cacao L.	M. Gonzalez, E.	s.n.	25/04/88	16.580556	-90.713889	0	44228	25	4	1988	8077	0	1528	7163	295668	796598	0.679489238	0.707317054	0.154849186	20	49	Mesoamerica	Unequivocal early introduction	T	0.007282915	0	0.001377776	0.006458774	0.266599581	0.718280954	0.00783655
269	GBIF	PRESERVED_SPECIMEN	UCJ	1849335397	SPECIES	Theobroma	cacao		Theobroma cacao L.	Cnf	s.n.	25/04/73	5.347015	-3.983645	0	44266	25	4	1973	9244	0	4413	13248	87518	1091179	0.681829631	0.708200425	0.105593032	196	56	Africa	Unequivocal late introduction	D	0.007667539	0	0.003660412	0.010988701	0.072592779	0.905090569	0.014649113
271	GBIF	PRESERVED_SPECIMEN	XAL	2629547547	SPECIES	Theobroma	cacao		Theobroma cacao L.	F. Ventura, A.	s.n.	25/03/71	19.588056	-96.946944	0	44204	25	3	1971	363265	0	22409	84132	270250	465484	0.385664009	0.45440957	0.35738115	25	46	Mesoamerica	Unequivocal early introduction	T	0.301329695	0	0.01858835	0.069787813	0.224173399	0.386120743	0.088376163
272	GBIF	PRESERVED_SPECIMEN	ENCB	1896072649	SPECIES	Theobroma	cacao		Theobroma cacao L.	F. Ventura, A.	s.n.	25/03/71	20.054444	-96.864167	0	44228	25	3	1971	897181	0	1969	7229	52504	243337	0.135185403	-0.017013233	0.328475723	25	46	Mesoamerica	Unequivocal early introduction	T	0.746270233	0	0.001637803	0.006013043	0.043672539	0.202406382	0.007650846
273	GBIF	PRESERVED_SPECIMEN	FUEL	2464872170	SPECIES	Theobroma	cacao		Theobroma cacao L.	Souza, L.R.M.; et al.	165	25/02/97	-10.05302263	-68.31503586	0	44214	25	2	1997	887	0	148	664	15225	1188676	0.852567884	0.881390572	0.077746108	2	67	Rondônia province	Potential early introduction	K	0.000735733	0	0.00012276	0.000550763	0.012628567	0.985962177	0.000673524
274	GBIF	PRESERVED_SPECIMEN	INPA	1042715112	SPECIES	Theobroma	cacao		Theobroma cacao L.	Santos, O.A.	265	25/11/09	-2.6346697	-56.7295262	1042715112	44260	25	11	2009	297925	0	5287	17702	112109	772402	0.503001372	0.774647892	0.49209606	228	62	Madeira province	Potential early introduction	J	0.247153494	0	0.004386005	0.014685277	0.093003712	0.640771512	0.019071282
275	GBIF	PRESERVED_SPECIMEN	K	1421197154	SPECIES	Theobroma	cacao		Theobroma cacao L.	Barnett, L.C.; et al.	DORR7864	25/11/90	8.57	-70.67	0	44260	25	11	1990	57923	0	10037	85142	536182	328820	0.496170589	0.481219828	0.210746951	6	54	Pacific dominion	Unequivocal early introduction	Q	0.056893009	0	0.009858521	0.083627999	0.526647572	0.322972899	0.09348652
276	GBIF	PRESERVED_SPECIMEN	COL	2013770035	SPECIES	Theobroma	cacao		Theobroma cacao L.	Bartley, B.G. & Holliday, P.C.	T51	25/11/52	0.734972	-69.458977	1321824879	44244	25	11	1952	7095	0	1762	4853	13547	718077	0.811494177	0.83649534	0.109758824	4	60	Imerí province	Potential early introduction	L	0.009519222	0	0.002364041	0.006511175	0.018175744	0.963429818	0.008875216
277	GBIF	PRESERVED_SPECIMEN	COL	2013765883	SPECIES	Theobroma	cacao	Theobroma leiocarpum, Theobroma cacao subsp. sphaerocarpum	Theobroma cacao L.	Phillipson, W.R.	1569	25/11/49	2.810782	-73.803773	1320391007	44244	25	11	1949	12585	0	3716	12056	53664	392401	0.70985412	0.765853643	0.185338284	7	58	Imerí province	Potential early introduction	L	0.026527016	0	0.007832689	0.025411975	0.113114485	0.827113835	0.033244664
278	GBIF	PRESERVED_SPECIMEN	COL	2013765796	SPECIES	Theobroma	cacao		Theobroma cacao L.	Philipson, W.R.; et al.	1565	25/11/49	2.147515727	-74.06840943	1322815790	44229	25	11	1949	6348	0	1076	4906	98025	1062972	0.763648751	0.808135986	0.117926711	7	59	Imerí province	Potential early introduction	L	0.005410256	0	0.00091705	0.004181273	0.083544485	0.905946936	0.005098323
279	GBIF	PRESERVED_SPECIMEN	U	2517216021	SPECIES	Theobroma	cacao		Theobroma cacao L.	Pennington, T.D.	10604	25/10/82	-0.2377524	-77.5077954	2517216021	44208	25	10	1982	32165	0	5136	13067	40333	725357	0.748574975	0.816042781	0.188949766	9	60	Paramo province	Potential early introduction	P	0.039415091	0	0.00629367	0.016012342	0.049424183	0.888854714	0.022306013
280	GBIF	PRESERVED_SPECIMEN	COAH	1147294470	SPECIES	Theobroma	cacao		Theobroma cacao L.	Betancur, J.; et al.	18683	25/01/14	2.69	-73.83	1147294470	44263	25	1	2014	4853	0	1125	3230	21530	194813	0.750040834	0.830303013	0.172955201	7	58	Imerí province	Potential early introduction	L	0.021516198	0	0.004987785	0.014320486	0.09545513	0.8637204	0.019308272
281	GBIF	PRESERVED_SPECIMEN	NY	1929211871	SPECIES	Theobroma	cacao		Theobroma cacao L.	Sasaki, D.; et al.	1884	25/01/08	-9.61875	-55.22266667	912375822	44249	25	1	2008	22069	0	7859	24661	156771	994240	0.74467739	0.832996607	0.195749733	227	67	Madeira province	Potential early introduction	J	0.018305408	0	0.006518746	0.020455375	0.130035667	0.824684804	0.026974121
282	GBIF	PRESERVED_SPECIMEN	MAC	1077584028	SPECIES	Theobroma	cacao		Theobroma cacao L.	Esteves, G.L.	326	25/01/86	-16.377778	-39.58	0	44216	25	1	1986	280378	0	10203	34271	151226	729503	0.439584443	0.681151271	0.529234408	215	71	South American Atlantic coast	Unequivocal late introduction	G	0.232566704	0	0.008463139	0.028426958	0.125438274	0.605104925	0.036890097
283	GBIF	PRESERVED_SPECIMEN	U	2515591267	SPECIES	Theobroma	cacao		Theobroma cacao L.	Ducke, A.	s.n.	24/09/31	-5.3677074	-71.6396058	1424167177	44204	24	9	1931	23240	0	6291	18608	65925	1091532	0.795467825	0.859717846	0.171762321	5	64	Madeira province	Potential early introduction	J	0.019276773	0	0.005218166	0.01543469	0.054682497	0.905387875	0.020652856
284	GBIF	PRESERVED_SPECIMEN	IPA	1208838558	SPECIES	Theobroma	cacao		Theobroma cacao L.	Barbosa, U.N.	s.n.	24/08/15	-8.0775	-34.961389	0	44260	24	8	2015	149886	0	8492	36351	218667	792196	0.577496698	0.701021641	0.345803999	214	66	South American Atlantic coast	Unequivocal late introduction	G	0.124325643	0	0.007043842	0.030151992	0.181377282	0.657101242	0.037195834
285	GBIF	PRESERVED_SPECIMEN	ESA	2459842989	SPECIES	Theobroma	cacao		Theobroma cacao L.	Flores, T.B.	1116	24/08/12	-19.07177567	-40.14766051	2459842989	44263	24	8	2012	3457	0	3293	15877	275092	907883	0.686827465	0.696568727	0.148658496	215	73	South American Atlantic coast	Unequivocal late introduction	G	0.002867447	0	0.002731416	0.013169354	0.228178122	0.753053661	0.01590077
286	GBIF	PRESERVED_SPECIMEN	KU	2309209256	SPECIES	Theobroma	cacao		Theobroma cacao L.	Dafne-Castillo	s.n.	24/05/11	15.28	-92.48	0	44217	24	5	2011	507936	0	2991	16663	137346	540652	0.298245816	0.501045316	0.513379714	21	49	Mesoamerica	Unequivocal early introduction	T	0.421318062	0	0.002480947	0.013821471	0.113924492	0.448455028	0.016302418
288	GBIF	PRESERVED_SPECIMEN	MA	1936676967	SPECIES	Theobroma	cacao		Theobroma cacao L.	Acosta, L. & Al.	1458	24/05/00	8.5347	-83.4267	0	44245	24	5	2000	573869	0	10540	26216	68443	526290	0.316018157	0.261051312	0.473064075	14	54	Puntarenas-Chiriquí province	Unequivocal early introduction	S	0.476098387	0	0.00874429	0.021749555	0.0567823	0.436625467	0.030493845
289	GBIF	PRESERVED_SPECIMEN	INB	1253731607	SPECIES	Theobroma	cacao		Theobroma cacao L.	Acosta, L.; et al.	s.n.	24/05/00	8.534815	-83.426667	0	44222	24	5	2000	573869	0	10540	26216	68443	526290	0.316018157	0.261051312	0.473064075	14	54	Puntarenas-Chiriquí province	Unequivocal early introduction	S	0.476098387	0	0.00874429	0.021749555	0.0567823	0.436625467	0.030493845
290	GBIF	PRESERVED_SPECIMEN	US	1321830503	SPECIES	Theobroma	cacao		Theobroma cacao L.	Kernan, C. & Phillips, P.	1109A	24/05/89	8.4667	-83.5833	1321830503	44238	24	5	1989	573869	0	10540	26216	68443	526290	0.316018157	0.261051312	0.473064075	14	54	Puntarenas-Chiriquí province	Unequivocal early introduction	S	0.476098387	0	0.00874429	0.021749555	0.0567823	0.436625467	0.030493845
291	GBIF	PRESERVED_SPECIMEN	INB	1253695322	SPECIES	Theobroma	cacao		Theobroma cacao L.	Kernan, C.	s.n.	24/05/89	8.466667	-83.583334	0	44222	24	5	1989	573869	0	10540	26216	68443	526290	0.316018157	0.261051312	0.473064075	14	54	Puntarenas-Chiriquí province	Unequivocal early introduction	S	0.476098387	0	0.00874429	0.021749555	0.0567823	0.436625467	0.030493845
292	GBIF	PRESERVED_SPECIMEN	XAL	2629650754	SPECIES	Theobroma	cacao		Theobroma cacao L.	Calzada, J.I.	s.n.	24/05/85	18.489167	-95.059722	0	44204	24	5	1985	313474	0	2070	13872	146185	533456	0.365349271	0.621694326	0.49228728	23	47	Mesoamerica	Unequivocal early introduction	T	0.310660349	0	0.00205142	0.013747489	0.144872886	0.528667855	0.015798909
293	GBIF	PRESERVED_SPECIMEN	IEB	1893747790	SPECIES	Theobroma	cacao		Theobroma cacao L.	Calzada, J.I.	s.n.	24/05/85	18.40065106	-95.04002619	0	44221	24	5	1985	313474	0	2070	13872	146185	533456	0.365349271	0.621694326	0.49228728	23	47	Mesoamerica	Unequivocal early introduction	T	0.310660349	0	0.00205142	0.013747489	0.144872886	0.528667855	0.015798909
294	GBIF	PRESERVED_SPECIMEN	US	2284269701	SPECIES	Theobroma	cacao		Theobroma cacao L.	Ernst, W.R.	1421	24/05/64	15.4140227	-61.3764457	1317858551	44223	24	5	1964	1024765	0	1055	2836	14090	158990	-0.063568063	-0.111111112	0.41915811	1	49	Antilles	Unequivocal late introduction	A	0.852737207	0	0.000877897	0.002359919	0.011724705	0.132300272	0.003237816
295	GBIF	PRESERVED_SPECIMEN	ASE	2464818296	SPECIES	Theobroma	cacao		Theobroma cacao L.	Carmo, V.S.; et al.	113	24/04/14	-14.4314	-39.2158	0	44211	24	4	2014	99366	0	672	6660	152944	945299	0.673434088	0.814982414	0.340831112	215	70	South American Atlantic coast	Unequivocal late introduction	G	0.082465449	0	0.000557704	0.005527242	0.126930696	0.78451891	0.006084945
296	GBIF	PRESERVED_SPECIMEN	MA	1936658970	SPECIES	Theobroma	cacao		Theobroma cacao L.	Macia, R.G.C.; et al.	3903	24/04/01	-14.2166	-67.9546	0	44245	24	4	2001	20520	0	3262	11919	60810	676220	0.78398279	0.877406955	0.204043869	1	70	Rondônia province	Potential early introduction	K	0.026555166	0	0.004221391	0.015424514	0.078694915	0.875104014	0.019645905
297	GBIF	PRESERVED_SPECIMEN	COL	2013770062	SPECIES	Theobroma	cacao		Theobroma cacao L.	Cope, F.W. & Holliday, P.C.	T107	24/04/53	1.0638279	-74.4523516	1322685997	44230	24	4	1953	14752	0	4882	22126	134119	882966	0.724992527	0.765533388	0.188196447	7	59	Imerí province	Potential early introduction	L	0.013932162	0	0.004610684	0.020896354	0.126665376	0.833895424	0.025507038
298	GBIF	PRESERVED_SPECIMEN	MO	1259183095	SPECIES	Theobroma	cacao		Theobroma cacao L.	Rudas, A.; et al.	3573	24/03/92	-3.7	-70.25	1123881906	44169	24	3	1992	45405	0	6479	20991	72181	650100	0.692628188	0.798938602	0.245448333	4	63	Imerí province	Potential early introduction	L	0.057102003	0	0.008148087	0.026398593	0.090775898	0.817575419	0.03454668
299	GBIF	PRESERVED_SPECIMEN	WAG	2626717351	SPECIES	Theobroma	cacao		Theobroma cacao L.	Buijn, J.	s.n	24/02/67	6.916667	-74.25	2626717351	44204	24	2	1967	64872	0	16304	55410	328746	740243	0.614404386	0.664611578	0.224985237	8	55	Magdalena province	Unequivocal early introduction	R	0.053810008	0	0.013523837	0.045961471	0.272688136	0.614016548	0.059485308
300	GBIF	PRESERVED_SPECIMEN	R	1086999390	SPECIES	Theobroma	cacao		Theobroma cacao L.	Glaziou, A.F.M.	12190	24/11/1880	-22.903692	-43.229852	0	44222	24	11	1880	785887	0	12109	34788	79781	292128	0.172428217	-0.043478262	0.393763827	217	76	South American Atlantic coast	Unequivocal late introduction	G	0.652354583	0	0.010051524	0.028877067	0.066225171	0.242491656	0.03892859
301	GBIF	PRESERVED_SPECIMEN	RB	1563894863	SPECIES	Theobroma	cacao		Theobroma cacao L.	Leoni, L.S.	1727	24/01/92	-14.84934418	-39.32853736	1563894863	44266	24	1	1992	50755	0	11476	23542	44120	924092	0.755338907	0.836630523	0.226952747	216	70	South American Atlantic coast	Unequivocal late introduction	G	0.048155334	0	0.0108882	0.022336181	0.041860178	0.876760106	0.033224382
302	GBIF	PRESERVED_SPECIMEN	US	1317631895	SPECIES	Theobroma	cacao		Theobroma cacao L.	Hoffman, B.	835	24/01/92	6.516666667	-58.25	1317631895	44271	24	1	1992	50755	0	11476	23542	44120	924092	0.755338907	0.836630523	0.226952747	231	55	Guianan Lowlands province	Potential early introduction	N	0.048155334	0	0.0108882	0.022336181	0.041860178	0.876760106	0.033224382
303	GBIF	PRESERVED_SPECIMEN	NY	1928420061	SPECIES	Theobroma	cacao		Theobroma cacao L.	Daly, D.C.; et al.	8321	23/09/94	-8.279	-71.08767	1319517199	44251	23	9	1994	21255	0	1892	6179	27192	1149029	0.816607505	0.854238331	0.146636219	4	66	Rondônia province	Potential early introduction	K	0.017631001	0	0.001569412	0.005125474	0.022555736	0.953118377	0.006694886
304	GBIF	PRESERVED_SPECIMEN	US	1319517199	SPECIES	Theobroma	cacao		Theobroma cacao L.	Daly, D.C.; et al.	8321	23/09/94	-8.2789	-71.0878	1319517199	44251	23	9	1994	11954	0	246	901	26466	1166027	0.799760414	0.824206471	0.120056907	4	66	Rondônia province	Potential early introduction	K	0.009915444	0	0.000204049	0.000747349	0.021952664	0.967180494	0.000951398
305	GBIF	PRESERVED_SPECIMEN	UJAT	1894875477	SPECIES	Theobroma	cacao		Theobroma cacao L.	Chavez, E.	s.n.	23/08/89	18.118611	-92.784444	0	44235	23	8	1989	23562	0	6732	26718	162077	881493	0.732983109	0.823475599	0.198919303	22	47	Mesoamerica	Unequivocal early introduction	T	0.021408673	0	0.006116764	0.024276247	0.147264811	0.800933506	0.03039301
306	GBIF	PRESERVED_SPECIMEN	MG	1314847845	SPECIES	Theobroma	cacao		Theobroma cacao L.	Croat, T.B.	62548	23/08/86	-7.616667	-72.6	1042500945	44238	23	8	1986	4587	0	72	243	683	378187	0.851557101	0.867432952	0.130050374	5	65	Rondônia province	Potential early introduction	K	0.011952409	0	0.000187611	0.000633188	0.001779703	0.985447088	0.0008208
307	GBIF	PRESERVED_SPECIMEN	MO	1259178546	SPECIES	Theobroma	cacao		Theobroma cacao L.	Croat, T.B.	62548	23/08/86	-7.61666	-72.6	1042500945	44169	23	8	1986	21255	0	1892	6179	27192	1149029	0.816607505	0.854238331	0.146636219	5	65	Rondônia province	Potential early introduction	K	0.017631001	0	0.001569412	0.005125474	0.022555736	0.953118377	0.006694886
308	GBIF	PRESERVED_SPECIMEN	U	2517366217	SPECIES	Theobroma	cacao		Theobroma cacao L.	Ellenberg, H.	2517	23/07/57	-8.3928622	-74.5826166	2517366217	44207	23	7	1957	21255	0	1892	6179	27192	1149029	0.816607505	0.854238331	0.146636219	6	66	Ucayali province	Potential native area	V	0.017631001	0	0.001569412	0.005125474	0.022555736	0.953118377	0.006694886
309	GBIF	PRESERVED_SPECIMEN	GH	1998398176	SPECIES	Theobroma	cacao		Theobroma cacao L.	Davidse, G.A.; et al.	18485	23/06/80	9.85	-72.8167	1322785649	44229	23	6	1980	21255	0	1892	6179	27192	1149029	0.816607505	0.854238331	0.146636219	8	53	Pacific dominion	Unequivocal early introduction	Q	0.017631001	0	0.001569412	0.005125474	0.022555736	0.953118377	0.006694886
310	GBIF	PRESERVED_SPECIMEN	MEXU	1895556056	SPECIES	Theobroma	cacao		Theobroma cacao L.	Leija, L.G.	s.n.	23/06/62	16.221389	-94.014722	0	44222	23	6	1962	21255	0	1892	6179	27192	1149029	0.816607505	0.854238331	0.146636219	22	49	Mesoamerica	Unequivocal early introduction	T	0.017631001	0	0.001569412	0.005125474	0.022555736	0.953118377	0.006694886
311	GBIF	PRESERVED_SPECIMEN	INIF	1893418079	SPECIES	Theobroma	cacao		Theobroma cacao L.	L., A.G.; et al.	s.n.	23/06/62	17.908333	-93.391667	0	44221	23	6	1962	21255	0	1892	6179	27192	1149029	0.816607505	0.854238331	0.146636219	22	48	Mesoamerica	Unequivocal early introduction	T	0.017631001	0	0.001569412	0.005125474	0.022555736	0.953118377	0.006694886
312	GBIF	PRESERVED_SPECIMEN	US	1322939167	SPECIES	Theobroma	cacao		Theobroma cacao L.	Gentle, P.H.	7377	23/06/51	16.2702377	-88.9533563	1322939167	44228	23	6	1951	106662	0	498	2257	67081	1029095	0.686139337	0.796363652	0.295408079	19	49	Mesoamerica	Unequivocal early introduction	T	0.088472644	0	0.000413075	0.001872108	0.055641498	0.853600676	0.002285182
313	GBIF	PRESERVED_SPECIMEN	KU	2309974935	SPECIES	Theobroma	cacao		Theobroma cacao L.	Carlos-Amores	s.n.	23/05/11	14.59	-92.1	0	44217	23	5	2011	507936	0	2991	16663	137346	540652	0.298245816	0.501045316	0.513379714	21	50	Mesoamerica	Unequivocal early introduction	T	0.421318062	0	0.002480947	0.013821471	0.113924492	0.448455028	0.016302418
315	GBIF	PRESERVED_SPECIMEN	NY	1931361791	SPECIES	Theobroma	cacao		Theobroma cacao L.	Jack, J.G.	8621	23/03/32	22.130781	-80.339315	1931361791	44246	23	3	1932	439773	0	4949	29504	294668	435954	0.365478384	0.475386769	0.369074237	14	45	Antilles	Unequivocal late introduction	A	0.365002888	0	0.004107572	0.024487736	0.244568609	0.361833194	0.028595308
316	GBIF	PRESERVED_SPECIMEN	MO	1258381195	SPECIES	Theobroma	cacao		Theobroma cacao L.	Callejas, R. & Marulanda, O.	5893	23/02/88	2.286042	-74.648749	1123908522	44169	23	2	1988	16744	0	4448	20596	179279	984207	0.713247716	0.749163032	0.165046296	8	58	Imerí province	Potential early introduction	L	0.013892277	0	0.003690447	0.017088231	0.14874543	0.816583615	0.020778678
317	GBIF	PRESERVED_SPECIMEN	US	1319897929	SUBSPECIES	Theobroma	cacao	Theobroma cacao subsp. sphaerocarpa (Chev.) Cuatrec.	Theobroma cacao L.	Car√≥n, C.	154	23/12/85	-0.0333	-76.7	0	44270	23	12	1985	14693	0	2767	12585	51748	1123797	0.801691147	0.845039845	0.14658904	9	60	Napo province	Potential native area	U	0.012187394	0	0.002295142	0.010438872	0.042923382	0.93215521	0.012734014
318	GBIF	PRESERVED_SPECIMEN	NY	1929949457	SPECIES	Theobroma	cacao		Theobroma cacao L.	Silveira, M.; et al.	1121	23/11/95	-8.4064	-71.3317	1321239175	44239	23	11	1995	519	0	291	2417	16733	215021	0.790154798	0.84406966	0.128092185	4	66	Rondônia province	Potential early introduction	K	0.002208689	0	0.001238398	0.010285938	0.071210013	0.915056962	0.011524336
319	GBIF	PRESERVED_SPECIMEN	INPA	1042711826	SPECIES	Theobroma	cacao		Theobroma cacao L.	Silveira, M.; et al.	1121	23/11/95	-8.406	-71.33	1321239175	44239	23	11	1995	519	0	291	2417	16733	215021	0.790154798	0.84406966	0.128092185	4	66	Rondônia province	Potential early introduction	K	0.002208689	0	0.001238398	0.010285938	0.071210013	0.915056962	0.011524336
320	GBIF	PRESERVED_SPECIMEN	COAH	768736814	SPECIES	Theobroma	cacao		Theobroma cacao L.	Duivenvoorden, J.; et al.	1403	23/11/91	-0.83333	-71.83333	768736814	44223	23	11	1991	9646	0	150	852	5264	1056454	0.820015111	0.835764468	0.126346866	6	60	Imerí province	Potential early introduction	L	0.008995063	0	0.000139878	0.000794505	0.004908772	0.985161782	0.000934382
321	GBIF	PRESERVED_SPECIMEN	UIS	1062306947	SPECIES	Theobroma	cacao		Theobroma cacao L.	Jorge, B.	1728	23/10/87	7.06974	-73.08958	0	44235	23	10	1987	15940	0	5225	25730	112514	179042	0.570921726	0.622122765	0.222558653	7	55	Magdalena province	Unequivocal early introduction	R	0.047096921	0	0.015437981	0.076022822	0.332438078	0.529004199	0.091460802
322	GBIF	PRESERVED_SPECIMEN	L	2516282627	SPECIES	Theobroma	cacao		Theobroma cacao L.	Atma	s.n.	23/10/57	-6.5517758	106.6291304	2516282627	44210	23	10	1957	356039	0	14930	52166	226985	555452	0.399941821	0.561941415	0.378201949	122	65	Asia	Unequivocal late introduction	E	0.295327861	0	0.012384163	0.043270746	0.18827992	0.46073731	0.055654909
323	GBIF	PRESERVED_SPECIMEN	US	2397724007	SPECIES	Theobroma	cacao		Theobroma cacao L.	Killip, E.P. & Smith, A.C.	30222	23/10/29	-1.685563884	-50.48091594	2397724007	44207	23	10	1929	102821	0	3930	13506	48651	1036660	0.72492429	0.863247871	0.362345228	225	61	Roraima province	Potential early introduction	M	0.085288428	0	0.003259874	0.011203018	0.040355252	0.859893428	0.014462892
327	GBIF	PRESERVED_SPECIMEN	IRAI	1090159915	SPECIES	Theobroma	cacao		Theobroma cacao L.	Dunaiski Jr, A.	s.n.	22/08/09	-14.781333	-39.272639	0	44216	22	8	2009	140721	0	6661	25484	176828	855630	0.644052284	0.763287425	0.315930606	215	70	South American Atlantic coast	Unequivocal late introduction	G	0.116749521	0	0.005526315	0.021142863	0.146705782	0.709875519	0.026669178
328	GBIF	PRESERVED_SPECIMEN	JPB	1089173967	SPECIES	Theobroma	cacao		Theobroma cacao L.	Gadelha Neto, P.C.	1753	22/08/07	-8	-34.866667	0	44216	22	8	2007	149886	0	8492	36351	218667	792196	0.577496698	0.701021641	0.345803999	214	65	South American Atlantic coast	Unequivocal late introduction	G	0.124325643	0	0.007043842	0.030151992	0.181377282	0.657101242	0.037195834
329	GBIF	PRESERVED_SPECIMEN	JBGP	1273760105	SPECIES	Theobroma	cacao		Theobroma cacao L.	Gentry, A. & Cuadros, H.	55452	22/08/86	11.083333	-73.466667	0	44260	22	8	1986	159747	0	7507	29802	119140	438687	0.534251464	0.710016608	0.377734324	8	52	Pacific dominion	Unequivocal early introduction	Q	0.211618224	0	0.009944587	0.039478966	0.157825782	0.58113244	0.049423553
330	GBIF	PRESERVED_SPECIMEN	ESA	2459907103	SPECIES	Theobroma	cacao		Theobroma cacao L.	Capellari Junior, L.	226	22/07/87	-22.72594757	-47.78269974	0	44242	22	7	1987	39948	0	22490	60833	207085	875235	0.658914942	0.726366639	0.220872871	220	76	South American Atlantic coast	Unequivocal late introduction	G	0.033135616	0	0.018654751	0.050459069	0.171770526	0.725980038	0.069113821
331	GBIF	PRESERVED_SPECIMEN	COAH	768763453	SPECIES	Theobroma	cacao		Theobroma cacao L.	L√≥pez, R.C.; et al.	7953	22/06/03	2.33	-72.75	768763453	44216	22	6	2003	6343	0	322	1536	71873	1125524	0.7592053	0.802800477	0.108903987	7	58	Imerí province	Potential early introduction	L	0.005261289	0	0.000267087	0.001274057	0.059616058	0.933581509	0.001541144
332	GBIF	PRESERVED_SPECIMEN	F	1228610113	SPECIES	Theobroma	cacao		Theobroma cacao L.	S√°nchez-Vega, I.; et al.	9830	22/06/99	-6	-77.3	1228610113	44266	22	6	1999	89266	0	13066	32686	148623	921896	0.685657298	0.79982233	0.243768518	8	64	Ucayali province	Potential native area	V	0.07404667	0	0.010838324	0.027113228	0.123283649	0.76471813	0.037951552
333	GBIF	PRESERVED_SPECIMEN	US	1322121541	SPECIES	Theobroma	cacao		Theobroma cacao L.	Pittier H.F.	s.n.	22/06/06	10.9319928	-74.0827842	1321718281	44237	22	6	1906	590322	0	7566	27687	99266	480534	0.313315325	0.205066338	0.472733325	9	52	Pacific dominion	Unequivocal early introduction	Q	0.489741367	0	0.006276885	0.022969615	0.082352795	0.398659338	0.0292465
334	GBIF	PRESERVED_SPECIMEN	US	2426896560	SPECIES	Theobroma	cacao		Theobroma cacao L.	Velasco, K.	s.n.	22/05/16	16.8199	-98.6576	0	44242	22	5	2016	178546	0	732	4049	109614	535798	0.494129484	0.697872341	0.436779236	25	48	Mesoamerica	Unequivocal early introduction	T	0.21544298	0	0.00088327	0.004885736	0.132266009	0.646522005	0.005769006
335	GBIF	PRESERVED_SPECIMEN	US	1320386954	SPECIES	Theobroma	cacao		Theobroma cacao L.	Gentry, A.H. & Estensoro, S.	70384	22/05/90	-13.5833	-68.7667	1320386954	44270	22	5	1990	22828	0	8438	30010	171062	973258	0.746556834	0.84634918	0.194411337	2	69	Rondônia province	Potential early introduction	K	0.018935033	0	0.006999028	0.024892252	0.141889986	0.8072837	0.03189128
336	GBIF	PRESERVED_SPECIMEN	SPSF	1086873388	SPECIES	Theobroma	cacao		Theobroma cacao L.	Pickel, D.B.	s.n.	22/05/48	-12.91718882	-38.42919154	0	44216	22	5	1948	905067	0	11086	30513	75222	172690	0.093340697	-0.026521061	0.330414431	215	69	South American Atlantic coast	Unequivocal late introduction	G	0.757645796	0	0.009280265	0.025542911	0.062969517	0.14456151	0.034823176
337	GBIF	PRESERVED_SPECIMEN	ASE	2464818453	SPECIES	Theobroma	cacao		Theobroma cacao L.	Carmo, V.S.; et al.	64	22/04/14	-14.4312	-39.2156	0	44211	22	4	2014	99366	0	672	6660	152944	945299	0.673434088	0.814982414	0.340831112	215	70	South American Atlantic coast	Unequivocal late introduction	G	0.082465449	0	0.000557704	0.005527242	0.126930696	0.78451891	0.006084945
338	GBIF	PRESERVED_SPECIMEN	VIC	2243139464	SPECIES	Theobroma	cacao		Theobroma cacao L.	Carmo, V.S.	69	22/04/14	-14.72	-39.365556	1094177148	44207	22	4	2014	140721	0	6661	25484	176828	855630	0.644052284	0.763287425	0.315930606	216	70	South American Atlantic coast	Unequivocal late introduction	G	0.116749521	0	0.005526315	0.021142863	0.146705782	0.709875519	0.026669178
339	GBIF	PRESERVED_SPECIMEN	UESC	1094177167	SPECIES	Theobroma	cacao		Theobroma cacao L.	Carmo, V.S.	16499	22/04/14	-1.4521837	-48.4771908	2517466046	44207	22	4	2014	331693	0	8572	27035	185859	652409	0.410442507	0.658553213	0.55760358	223	61	Pará province	Potential early introduction	H	0.275134211	0	0.007110341	0.022425114	0.154167164	0.54116317	0.029535455
340	GBIF	PRESERVED_SPECIMEN	L	2515164171	SPECIES	Theobroma	cacao		Theobroma cacao L.	Heilbron, T.J.; et al.	40	22/04/12	5.14	-55.069444	2515164171	44211	22	4	2012	152105	0	8071	25352	83066	936856	0.659534505	0.837892592	0.361537154	228	57	Guianan Lowlands province	Potential early introduction	N	0.126181094	0	0.006695425	0.02103115	0.068908706	0.777183624	0.027726575
343	GBIF	PRESERVED_SPECIMEN	MG	1314854280	SPECIES	Theobroma	cacao		Theobroma cacao L.	Urbinati, C.V.	8	22/02/94	-1.3651018	-48.3029982	1314854280	44235	22	2	1994	24466	0	3042	13166	74906	1090018	0.775757741	0.848055363	0.204488549	223	61	Pará province	Potential early introduction	H	0.020293663	0	0.002523229	0.010920722	0.062131822	0.904130564	0.013443951
345	GBIF	PRESERVED_SPECIMEN	NY	1928998058	SPECIES	Theobroma	cacao		Theobroma cacao L.	Silveira, M.; et al.	1086	22/11/95	-8.4472	-71.3444	1928998058	44251	22	11	1995	519	0	291	2417	16733	215021	0.790154798	0.84406966	0.128092185	4	66	Rondônia province	Potential early introduction	K	0.002208689	0	0.001238398	0.010285938	0.071210013	0.915056962	0.011524336
346	GBIF	PRESERVED_SPECIMEN	L	2516388769	SPECIES	Theobroma	cacao		Theobroma cacao L.	Danser, B.H.	5601	22/11/25	-6.5948329	106.6518035	2516388769	44209	22	11	1925	356039	0	14930	52166	226985	555452	0.399941821	0.561941415	0.378201949	122	65	Asia	Unequivocal late introduction	E	0.295327861	0	0.012384163	0.043270746	0.18827992	0.46073731	0.055654909
347	GBIF	PRESERVED_SPECIMEN	NY	1929669546	SPECIES	Theobroma	cacao		Theobroma cacao L.	Daly, D.C.; et al.	7844	22/10/93	-10.1167	-69.2167	1322480938	44230	22	10	1993	16149	0	6164	18662	55933	809267	0.796217427	0.869060993	0.176741371	3	67	Rondônia province	Potential early introduction	K	0.017821061	0	0.006802218	0.020594256	0.061724281	0.893058184	0.027396474
348	GBIF	PRESERVED_SPECIMEN	MO	1260583014	SPECIES	Theobroma	cacao		Theobroma cacao L.	Daly, D.C.; et al.	7844	22/10/93	-10.11666	-69.21666	1322480938	44169	22	10	1993	16149	0	6164	18662	55933	809267	0.796217427	0.869060993	0.176741371	3	67	Rondônia province	Potential early introduction	K	0.017821061	0	0.006802218	0.020594256	0.061724281	0.893058184	0.027396474
349	GBIF	PRESERVED_SPECIMEN	BANGEV	1417925331	SPECIES	Theobroma	cacao		Theobroma cacao L.	Disponible, N.O.	s.n.	22/01/86	14.899722	-92.402778	0	44218	22	1	1986	507936	0	2991	16663	137346	540652	0.298245816	0.501045316	0.513379714	21	50	Mesoamerica	Unequivocal early introduction	T	0.421318062	0	0.002480947	0.013821471	0.113924492	0.448455028	0.016302418
350	GBIF	PRESERVED_SPECIMEN	MG	1314851882	SPECIES	Theobroma	cacao		Theobroma cacao L.	Pires-O'Brien, M.J.P.; et al.	707b	21/09/86	-2.253102457	-49.51357056	1314851882	44235	21	9	1986	115461	0	2486	9033	116586	755108	0.648501879	0.854014575	0.426249252	224	62	Pará province	Potential early introduction	H	0.115614305	0	0.002489301	0.009044994	0.116740798	0.756110603	0.011534294
351	GBIF	PRESERVED_SPECIMEN	B	2446662956	SPECIES	Theobroma	cacao		Theobroma cacao L.	Renderos, M.	s.n.	21/07/97	13.66667	-89.25	0	44215	21	7	1997	127532	0	7202	36165	377966	525552	0.541261439	0.593006968	0.272521498	19	51	Mesoamerica	Unequivocal early introduction	T	0.118698792	0	0.00670317	0.033660115	0.351787062	0.48915086	0.040363285
352	GBIF	PRESERVED_SPECIMEN	CNMT	1944961483	SPECIES	Theobroma	cacao		Theobroma cacao L.	Pospiecho, R.	s.n.	21/06/10	-11.873056	-55.048333	0	44228	21	6	2010	2131	0	2622	10591	79002	768979	0.769419019	0.823552251	0.135622196	226	68	Xingu-Tapajós province	Potential early introduction	I	0.002468364	0	0.003037095	0.012267686	0.091508991	0.890717864	0.015304781
353	GBIF	PRESERVED_SPECIMEN	HUA	1123908036	SPECIES	Theobroma	cacao		Theobroma cacao L.	Waide, R.	62103	21/06/72	7.304754	-75.0725	1123908036	44225	21	6	1972	34275	0	7914	40889	225674	317425	0.561893669	0.605162919	0.229354603	9	55	Magdalena province	Unequivocal early introduction	R	0.054736919	0	0.012638599	0.065299428	0.360399695	0.506925358	0.077938027
355	GBIF	PRESERVED_SPECIMEN	US	1321445743	SPECIES	Theobroma	cacao		Theobroma cacao L.	Vigo, J.S. & Graham, J.	16646	21/04/05	-8.19619	-76.4879	1321445743	44239	21	4	2005	36424	0	4982	13022	50177	746529	0.75128128	0.829402506	0.201735917	8	66	Ucayali province	Potential native area	V	0.042794672	0	0.005853367	0.015299589	0.058953114	0.877099258	0.021152956
357	GBIF	PRESERVED_SPECIMEN	HUA	1123910824	SPECIES	Theobroma	cacao		Theobroma cacao L.	Fonnegra, R.; et al.	2721	21/04/89	5.88407	-75.66408	1123910824	44225	21	4	1989	28877	0	5996	16211	72165	976314	0.736397694	0.790030241	0.170989208	9	56	Cauca province	Unequivocal early introduction	#N/A	0.026262251	0	0.005453075	0.01474313	0.065630619	0.887910925	0.020196205
358	GBIF	PRESERVED_SPECIMEN	FLAS	1457803237	SPECIES	Theobroma	cacao		Theobroma cacao L.	Abbott, J.R.	24332	21/03/08	28.64416667	-82.34666667	1457803237	44259	21	3	2008	376304	0	5881	31767	404373	387166	0.154793186	0.492642343	0.639704387	17	40	North America	Unequivocal late introduction	B	0.312158282	0	0.00487851	0.026351918	0.335442571	0.321168719	0.031230428
360	GBIF	PRESERVED_SPECIMEN	INPA	1042573018	SPECIES	Theobroma	cacao		Theobroma cacao L.	Monteiro, O.P. & Ramos, J.F.	562	21/02/76	-7.6279977	-72.6761487	1042573018	44266	21	2	1976	13881	0	3090	10218	47685	1130723	0.815230872	0.864098847	0.14493554	5	65	Rondônia province	Potential early introduction	K	0.011513798	0	0.002563046	0.008475469	0.039553018	0.93789467	0.011038515
361	GBIF	PRESERVED_SPECIMEN	COAH	1147295250	SPECIES	Theobroma	cacao		Theobroma cacao L.	Fern√°ndez-P√©rez, A.	7186	21/02/67	2.53	-73.95	1147295250	44223	21	2	1967	4853	0	1125	3230	21530	194813	0.750040834	0.830303013	0.172955201	7	58	Imerí province	Potential early introduction	L	0.021516198	0	0.004987785	0.014320486	0.09545513	0.8637204	0.019308272
363	GBIF	PRESERVED_SPECIMEN	MO	1260439487	SPECIES	Theobroma	cacao		Theobroma cacao L.	Killip, E.P. & Garcia, H.	33603	21/02/39	6.326231739	-77.36058039	1319098450	44169	21	2	1939	760732	0	4844	13218	35179	220335	0.099879589	-0.118749999	0.38265793	10	56	Pacific dominion	Unequivocal early introduction	Q	0.735498517	0	0.004683325	0.012779559	0.034012112	0.213026487	0.017462883
364	GBIF	PRESERVED_SPECIMEN	EAC	1978384667	SPECIES	Theobroma	cacao		Theobroma cacao L.	Sobczak, J.C.M.S.M.	693	21/10/17	-4.235861	-38.910139	0	44245	21	10	2017	261334	0	7869	26688	165198	744454	0.527198037	0.696766973	0.371118767	217	63	South American Atlantic coast	Unequivocal late introduction	G	0.216777004	0	0.006527349	0.022137742	0.137032026	0.617525878	0.028665091
365	GBIF	PRESERVED_SPECIMEN	NY	1930738434	SPECIES	Theobroma	cacao		Theobroma cacao L.	Nelson, B.W.	764	21/10/80	-10	-67.83	1930738434	44246	21	10	1980	6729	0	3665	15739	118026	1061443	0.771113074	0.841849774	0.154075544	2	67	Rondônia province	Potential early introduction	K	0.005581444	0	0.003039975	0.013054889	0.09789798	0.880425713	0.016094864
366	GBIF	PRESERVED_SPECIMEN	US	2284380856	SUBSPECIES	Theobroma	cacao	Theobroma cacao	Theobroma cacao subsp. sphaerocarpa (Chev.) Cuatrec.	S.f.smith, D.A.B.McC.J.O.S. & Timana, M.E.	1466	21/01/89	-12.83	-69.33	0	44221	21	1	1989	27735	0	6088	21078	86842	1061707	0.780918522	0.854355395	0.186272617	2	69	Rondônia province	Potential early introduction	K	0.023046242	0	0.005058789	0.017514645	0.072160871	0.882219452	0.022573435
367	GBIF	PRESERVED_SPECIMEN	U	2515429444	SPECIES	Theobroma	cacao		Theobroma cacao L.	Mexia, Y.E.J.	6399	21/01/32	-3.8101252	-72.8042797	2515429444	44239	21	1	1932	79	0	35	230	2781	938845	0.843761498	0.846679091	0.028120796	6	63	Madeira province	Potential early introduction	J	8.39E-05	0	3.72E-05	0.000244169	0.002952323	0.996682485	0.000281325
368	GBIF	PRESERVED_SPECIMEN	K	1421197177	SPECIES	Theobroma	cacao		Theobroma cacao L.	Pesha, V. & Alexiades, M.	958	20/09/89	-12.83	-69.28	0	44260	20	9	1989	27735	0	6088	21078	86842	1061707	0.780918522	0.854355395	0.186272617	2	69	Rondônia province	Potential early introduction	K	0.023046242	0	0.005058789	0.017514645	0.072160871	0.882219452	0.022573435
370	GBIF	PRESERVED_SPECIMEN	MA	1936309266	SPECIES	Theobroma	cacao		Theobroma cacao L.	Cuatrecasas, J. & Barros, O.	26005	20/09/61	3.22059	-76.415465	1319588070	44245	20	9	1961	42281	0	9189	30115	116930	492551	0.633416899	0.712782443	0.22465369	9	58	Cauca province	Unequivocal early introduction	#N/A	0.061182289	0	0.013296849	0.043577603	0.169202363	0.712740896	0.056874452
371	GBIF	PRESERVED_SPECIMEN	MA	1936309232	SPECIES	Theobroma	cacao		Theobroma cacao L.	Cuatrecasas, J. & Barros, O.	26004	20/09/61	3.3155683	-76.4900613	1322955844	44228	20	9	1961	42281	0	9189	30115	116930	492551	0.633416899	0.712782443	0.22465369	9	58	Cauca province	Unequivocal early introduction	#N/A	0.061182289	0	0.013296849	0.043577603	0.169202363	0.712740896	0.056874452
372	GBIF	PRESERVED_SPECIMEN	COL	2013767502	SPECIES	Theobroma	cacao		Theobroma cacao L.	Baker, R.E.D. & Cope, F.W.	T15	20/09/52	-1.3220043	-69.578386	1228271405	44244	20	9	1952	31394	0	312	1182	5893	1116266	0.800548636	0.841839969	0.223691472	4	61	Imerí province	Potential early introduction	L	0.027179846	0	0.000270119	0.001023335	0.005101957	0.966424743	0.001293454
373	GBIF	PRESERVED_SPECIMEN	F	1228305857	SPECIES	Theobroma	cacao		Theobroma cacao L.	Foster, R.B.	3283	20/08/76	-11.8882179	-71.4075413	1228305857	44224	20	8	1976	8873	0	690	2172	7592	1186261	0.858682096	0.87120074	0.091802938	4	68	Rondônia province	Potential early introduction	K	0.007359894	0	0.000572335	0.001801611	0.006297342	0.983968819	0.002373945
374	GBIF	PRESERVED_SPECIMEN	COL	1890981309	SPECIES	Theobroma	cacao		Theobroma cacao L.	Renteria, R.; et al.	1706	20/07/77	7.247707263	-74.65884695	1890981309	44249	20	7	1977	13712	0	2982	15398	179138	994365	0.73373853	0.811725318	0.166662128	9	55	Magdalena province	Unequivocal early introduction	R	0.011373637	0	0.002473467	0.012772117	0.148588871	0.824791908	0.015245584
375	GBIF	PRESERVED_SPECIMEN	INIF	1893418093	SPECIES	Theobroma	cacao		Theobroma cacao L.	J. Chavelas, P. & L., A.P.J.	s.n.	20/07/65	17.841667	-93.425	0	44221	20	7	1965	45001	0	5848	19150	122975	864524	0.691668806	0.751680374	0.220925482	22	48	Mesoamerica	Unequivocal early introduction	T	0.042554218	0	0.005530034	0.018108781	0.116288636	0.817518331	0.023638815
376	GBIF	PRESERVED_SPECIMEN	MG	2365692086	SPECIES	Theobroma	cacao		Theobroma cacao L.	Santos, L.A.S.	1590	20/06/15	-8.999722	-61.92	1930423130	44215	20	6	2015	2673	0	316	6948	169806	902365	0.77207411	0.862413526	0.160947926	231	66	Madeira province	Potential early introduction	J	0.002470179	0	0.000292023	0.006420801	0.15692149	0.833895508	0.006712823
377	GBIF	PRESERVED_SPECIMEN	U	2515518167	SPECIES	Theobroma	cacao		Theobroma cacao L.	Boer, J.G.W.	1593	20/06/63	2.8545743	-56.561647	1322771920	44211	20	6	1963	158	0	72	331	1618	1097232	0.879442141	0.882352948	0.029143565	229	58	Guianan Lowlands province	Potential early introduction	N	0.000143713	0	6.55E-05	0.00030107	0.001471697	0.99801803	0.00036656
378	GBIF	PRESERVED_SPECIMEN	KU	2308339987	SPECIES	Theobroma	cacao		Theobroma cacao L.	Inifap	s.n.	20/05/14	14.58	-92.09	0	44217	20	5	2014	507936	0	2991	16663	137346	540652	0.298245816	0.501045316	0.513379714	21	50	Mesoamerica	Unequivocal early introduction	T	0.421318062	0	0.002480947	0.013821471	0.113924492	0.448455028	0.016302418
379	GBIF	PRESERVED_SPECIMEN	KHD	2242392855	SPECIES	Theobroma	cacao		Theobroma cacao L.	Richards, V.; et al.	s.n.	20/04/99	39.73193	-104.9619	2242392855	44242	20	4	1999	137189	0	147004	128689	62161	18862	0.21069338	0.168168172	0.151202489	34	32	North America	Unequivocal late introduction	B	0.277763942	0	0.297636185	0.260554155	0.125856187	0.03818953	0.55819034
380	GBIF	PRESERVED_SPECIMEN	WAG	2626685346	SPECIES	Theobroma	cacao		Theobroma cacao L.	Manning, S.D.	1776	20/04/87	4.666667	9.416667	2626685346	44204	20	4	1987	1306	0	436	2793	29116	902004	0.742746018	0.751915693	0.084277775	187	57	Africa	Unequivocal late introduction	D	0.001395814	0	0.000465984	0.002985075	0.031118307	0.964034821	0.003451058
381	GBIF	PRESERVED_SPECIMEN	MO	1259181874	SPECIES	Theobroma	cacao		Theobroma cacao L.	Rudas, A.; et al.	1675	20/03/91	-3.78	-70.28	1259181874	44169	20	3	1991	45405	0	6479	20991	72181	650100	0.692628188	0.798938602	0.245448333	4	63	Imerí province	Potential early introduction	L	0.057102003	0	0.008148087	0.026398593	0.090775898	0.817575419	0.03454668
383	GBIF	PRESERVED_SPECIMEN	AAU	47855709	SPECIES	Theobroma	cacao		Theobroma cacao L.	Holm-Nielsen, L.B.	s.n.	20/02/80	-0.283	-75.883	0	44260	20	2	1980	14693	0	2767	12585	51748	1123797	0.801691147	0.845039845	0.14658904	8	60	Napo province	Potential native area	U	0.012187394	0	0.002295142	0.010438872	0.042923382	0.93215521	0.012734014
384	GBIF	PRESERVED_SPECIMEN	U	2515538045	SUBSPECIES	Theobroma	cacao	Theobroma cacao. subsp. Sphaerocarpum	Theobroma cacao L.	Idrobo, J.M. & Schultes, R.E.	940	20/12/50	2.1831929	-73.7843783	2515538045	44211	20	12	1950	4686	0	397	2299	92074	1070090	0.770035819	0.813222647	0.109432699	7	59	Imerí province	Potential early introduction	L	0.004006683	0	0.000339448	0.00196572	0.078726275	0.914961874	0.002305168
385	GBIF	PRESERVED_SPECIMEN	UJAT	1894548653	SPECIES	Theobroma	cacao		Theobroma cacao L.	Mendez, A.C.V.	s.n.	20/11/02	17.75	-92.379722	0	44235	20	11	2002	60619	0	15278	46344	209377	873937	0.64961972	0.717868328	0.221567313	21	48	Mesoamerica	Unequivocal early introduction	T	0.050283065	0	0.012673001	0.038442045	0.173676854	0.724925035	0.051115047
386	GBIF	PRESERVED_SPECIMEN	MPUC	1090596572	SPECIES	Theobroma	cacao		Theobroma cacao L.	s.c.	s.n.	20/11/85	-4.368306	-70.037778	0	44222	20	11	1985	52290	0	8608	29641	105817	608931	0.689182291	0.8391155	0.292874337	4	63	Madeira province	Potential early introduction	J	0.064933372	0	0.010689357	0.036807995	0.131402841	0.756166435	0.047497352
387	GBIF	PRESERVED_SPECIMEN	MFS	2005003039	SPECIES	Theobroma	cacao		Theobroma cacao L.	Nunes, H.	18	20/10/18	-1.446436	-48.427906	0	44222	20	10	2018	331693	0	8572	27035	185859	652409	0.410442507	0.658553213	0.55760358	223	61	Pará province	Potential early introduction	H	0.275134211	0	0.007110341	0.022425114	0.154167164	0.54116317	0.029535455
388	GBIF	PRESERVED_SPECIMEN	RB	1844893341	SPECIES	Theobroma	cacao		Theobroma cacao L.	Medeiros, H.; et al.	2724	20/10/17	-9.270278	-68.995833	1844893341	44266	20	10	2017	48468	0	11792	31055	108409	1005865	0.72156287	0.822488785	0.204461702	3	66	Rondônia province	Potential early introduction	K	0.040202756	0	0.009781111	0.025759193	0.089922022	0.834334918	0.035540304
389	GBIF	PRESERVED_SPECIMEN	KU	2305171276	SPECIES	Theobroma	cacao		Theobroma cacao L.	Rito-Coronel	s.n.	20/10/10	16.06	-90.56	0	44217	20	10	2010	39932	0	10557	29724	116521	1008859	0.736093256	0.819421887	0.202613617	20	49	Mesoamerica	Unequivocal early introduction	T	0.033122289	0	0.008756687	0.024655087	0.096650362	0.836815575	0.033411773
390	GBIF	PRESERVED_SPECIMEN	INB	1253647763	SPECIES	Theobroma	cacao		Theobroma cacao L.	Jimenez, Q.; et al.	s.n.	20/10/92	9.697222	-84.391667	0	44222	20	10	1992	825917	0	2208	5408	39722	236017	0.018597712	-0.193548381	0.436969101	15	53	Puntarenas-Chiriquí province	Unequivocal early introduction	S	0.744557692	0	0.001990495	0.00487527	0.035809071	0.212767473	0.006865764
391	GBIF	PRESERVED_SPECIMEN	MA	1936699565	SPECIES	Theobroma	cacao		Theobroma cacao L.	L. Cayola, A.A.M.C. & D.	803	02/09/04	-14.5422	-68.495	0	44245	2	9	2004	97119	0	16761	51226	244030	796390	0.650829789	0.783300221	0.263085905	2	70	Rondônia province	Potential early introduction	K	0.080561514	0	0.013903474	0.042492655	0.202426161	0.660616196	0.056396129
392	GBIF	PRESERVED_SPECIMEN	US	1319786151	SPECIES	Theobroma	cacao		Theobroma cacao L.	P. Nunez, H.B.L.C.N. & Tenteyo, J.	23943	02/09/98	-11.8825	-72.6517	0	44270	2	9	1998	79357	0	8466	30989	166694	917180	0.61473222	0.692934811	0.199893571	5	68	Rondônia province	Potential early introduction	K	0.065983141	0	0.007039244	0.025766493	0.13860143	0.762609692	0.032805736
394	GBIF	PRESERVED_SPECIMEN	INB	1253895721	SPECIES	Theobroma	cacao		Theobroma cacao L.	Acosta, L.; et al.	s.n.	02/05/07	8.654	-83.178583	0	44222	2	5	2007	547859	0	7444	19201	55823	574428	0.294851329	0.481288642	0.559418581	14	54	Puntarenas-Chiriquí province	Unequivocal early introduction	S	0.454747231	0	0.00617885	0.01593768	0.046335562	0.476800677	0.02211653
395	GBIF	PRESERVED_SPECIMEN	HUA	1123901352	SPECIES	Theobroma	cacao		Theobroma cacao L.	Giraldo, J.	5	02/05/83	6.267645	-75.568952	1123901352	44225	2	5	1983	19053	0	4351	10946	34099	263413	0.688565752	0.776061773	0.2239946	9	56	Magdalena province	Unequivocal early introduction	R	0.057412418	0	0.013110871	0.03298359	0.102750541	0.79374258	0.046094461
396	GBIF	PRESERVED_SPECIMEN	UIS	1062313285	SPECIES	Theobroma	cacao		Theobroma cacao L.	Henry, L.	989	02/05/79	7.068632318	-73.31728022	0	44216	2	5	1979	27806	0	3996	21162	172975	979639	0.709621319	0.770133555	0.197063739	8	55	Magdalena province	Unequivocal early introduction	R	0.023064455	0	0.003314593	0.017553406	0.143478896	0.81258865	0.020867999
397	GBIF	PRESERVED_SPECIMEN	HUESB	2236798386	SPECIES	Theobroma	cacao		Theobroma cacao L.	Carmo, V.S.; et al.	4	02/04/14	-14.720278	-39.365833	0	44242	2	4	2014	140721	0	6661	25484	176828	855630	0.644052284	0.763287425	0.315930606	216	70	South American Atlantic coast	Unequivocal late introduction	G	0.116749521	0	0.005526315	0.021142863	0.146705782	0.709875519	0.026669178
398	GBIF	PRESERVED_SPECIMEN	UESC	1094177136	SPECIES	Theobroma	cacao		Theobroma cacao L.	Carmo, V.S.	9	02/04/14	-14.719722	-39.365278	0	43845	2	4	2014	140721	0	6661	25484	176828	855630	0.644052284	0.763287425	0.315930606	216	70	South American Atlantic coast	Unequivocal late introduction	G	0.116749521	0	0.005526315	0.021142863	0.146705782	0.709875519	0.026669178
399	GBIF	PRESERVED_SPECIMEN	INPA	1042614828	SPECIES	Theobroma	cacao		Theobroma cacao L.	Ramos, J. & Mota, G.	241	02/03/76	-8.065150237	-72.86715993	1042614828	44260	2	3	1976	13881	0	3090	10218	47685	1130723	0.815230872	0.864098847	0.14493554	5	66	Rondônia province	Potential early introduction	K	0.011513798	0	0.002563046	0.008475469	0.039553018	0.93789467	0.011038515
400	GBIF	PRESERVED_SPECIMEN	US	1318676589	SPECIES	Theobroma	cacao		Theobroma cacao L.	Standley, P.C.	21640	02/03/22	13.6390979	-88.7830612	1318676589	44211	2	3	1922	25072	0	4042	15399	169089	229937	0.569044675	0.60956651	0.225761956	18	51	Mesoamerica	Unequivocal early introduction	T	0.05652716	0	0.009113066	0.03471848	0.381226905	0.51841439	0.043831546
401	GBIF	PRESERVED_SPECIMEN	US	1318728144	SPECIES	Theobroma	cacao		Theobroma cacao L.	Moya, G. & Reyes, D.	222	02/02/04	-0.3461	-76.5539	1318728144	44270	2	2	2004	21255	0	1892	6179	27192	1149029	0.816607505	0.854238331	0.146636219	9	60	Napo province	Potential native area	U	0.017631001	0	0.001569412	0.005125474	0.022555736	0.953118377	0.006694886
402	GBIF	PRESERVED_SPECIMEN	HUA	1123891099	SPECIES	Theobroma	cacao		Theobroma cacao L.	Velez, J. & Blandon, J.	6907	02/12/05	6.222833	-75.579222	1123891099	44225	2	12	2005	28877	0	5996	16211	72165	976314	0.736397694	0.790030241	0.170989208	9	56	Magdalena province	Unequivocal early introduction	R	0.026262251	0	0.005453075	0.01474313	0.065630619	0.887910925	0.020196205
403	GBIF	PRESERVED_SPECIMEN	NY	1928031091	SPECIES	Theobroma	cacao		Theobroma cacao L.	Plowman, T.C.; et al.	12086	02/12/82	-2.883333	-64.866667	1927890095	44251	2	12	1982	63107	0	892	3569	18289	543836	0.721028656	0.874201775	0.376837686	1	62	Imerí province	Potential early introduction	L	0.100218678	0	0.001416563	0.005667841	0.029044312	0.863652605	0.007084405
404	GBIF	PRESERVED_SPECIMEN	US	1320333553	SPECIES	Theobroma	cacao		Theobroma cacao L.	Plowman, T.C.; et al.	12086	02/12/82	-2.8833	-64.8667	1927890095	44251	2	12	1982	63107	0	892	3569	18289	543836	0.721028656	0.874201775	0.376837686	1	62	Imerí province	Potential early introduction	L	0.100218678	0	0.001416563	0.005667841	0.029044312	0.863652605	0.007084405
405	GBIF	PRESERVED_SPECIMEN	INPA	1042592145	SPECIES	Theobroma	cacao		Theobroma cacao L.	Plowman, T.C.; et al.	12086	02/12/82	-2.883333	-64.87	1927890095	44251	2	12	1982	63107	0	892	3569	18289	543836	0.721028656	0.874201775	0.376837686	1	62	Imerí province	Potential early introduction	L	0.100218678	0	0.001416563	0.005667841	0.029044312	0.863652605	0.007084405
406	GBIF	PRESERVED_SPECIMEN	NY	1930656459	SPECIES	Theobroma	cacao		Theobroma cacao L.	Prance, G.T.; et al.	3568	02/12/66	-7.509589456	-63.02199391	1930656459	44246	2	12	1966	35726	0	4920	17328	90765	860067	0.736639093	0.822811872	0.218325676	232	65	Madeira province	Potential early introduction	J	0.035414143	0	0.004877053	0.017176742	0.0899727	0.852559362	0.022053794
407	GBIF	PRESERVED_SPECIMEN	L	2516253639	SPECIES	Theobroma	cacao		Theobroma cacao L.	MacKee, H.S.	1556	02/12/54	-4.3500441	152.042882	2516253639	44210	2	12	1954	911475	0	3231	4691	6838	275228	0.025622176	-0.175257728	0.490977638	93	63	Oceania and Pacific islands	Unequivocal late introduction	F	0.758637594	0	0.002689221	0.003904407	0.005691395	0.229077383	0.006593628
408	GBIF	PRESERVED_SPECIMEN	US	1320894095	SPECIES	Theobroma	cacao		Theobroma cacao L.	Fosberg, F.G.	29266	02/12/47	-3.7333	-62.4167	1320894095	44239	2	12	1947	111178	0	7691	19543	58093	903347	0.670874961	0.824134707	0.351108522	232	63	Madeira province	Potential early introduction	J	0.10108451	0	0.006992759	0.017768754	0.052818925	0.821335052	0.024761513
410	GBIF	PRESERVED_SPECIMEN	NY	1931209069	SPECIES	Theobroma	cacao		Theobroma cacao L.	Cid-Ferreira, C.A. & Moreira, M.	3102	02/11/80	-10.94185	-68.852445	1931209069	44246	2	11	1980	3305	0	1419	5132	33565	1162181	0.838464254	0.879881859	0.107765964	2	68	Rondônia province	Potential early introduction	K	0.002741369	0	0.001177005	0.004256795	0.027840863	0.963983968	0.0054338
411	GBIF	PRESERVED_SPECIMEN	L	2516256609	SPECIES	Theobroma	cacao		Theobroma cacao L.	Sykes, W.R.	168979	02/11/65	-19.0994425	-169.9178709	2516256609	44210	2	11	1965	768549	0	1805	3287	4688	13187	-0.007119933	-0.025547445	0.12813267	66	73	Oceania and Pacific islands	Unequivocal late introduction	F	0.97098353	0	0.002280434	0.00415279	0.005922811	0.016660434	0.006433224
412	GBIF	PRESERVED_SPECIMEN	XAL	2629644797	SPECIES	Theobroma	cacao		Theobroma cacao L.	R., V.O.O.	s.n.	02/10/78	18.165833	-93.018055	0	44204	2	10	1978	757149	0	7452	18907	80955	338708	0.152535399	-0.088372096	0.433677244	22	47	Mesoamerica	Unequivocal early introduction	T	0.629294589	0	0.006193633	0.015714308	0.0672847	0.281512769	0.021907942
413	GBIF	PRESERVED_SPECIMEN	ENCB	1896072659	SPECIES	Theobroma	cacao		Theobroma cacao L.	R. Ortega, O.; et al.	s.n.	02/10/78	18.177778	-92.991944	0	44228	2	10	1978	512695	0	5755	18452	129122	539365	0.174856248	0.529219925	0.633549561	22	47	Mesoamerica	Unequivocal early introduction	T	0.425335721	0	0.004774392	0.015307921	0.107120606	0.447461359	0.020082314
414	GBIF	PRESERVED_SPECIMEN	MEXU	1895556061	SPECIES	Theobroma	cacao		Theobroma cacao L.	R. Ortega, O.	s.n.	02/10/78	18.165833	-93.018056	0	44222	2	10	1978	757149	0	7452	18907	80955	338708	0.152535399	-0.088372096	0.433677244	22	47	Mesoamerica	Unequivocal early introduction	T	0.629294589	0	0.006193633	0.015714308	0.0672847	0.281512769	0.021907942
415	GBIF	PRESERVED_SPECIMEN	XAL	2629724092	SPECIES	Theobroma	cacao		Theobroma cacao L.	M. Chazaro, B.	s.n.	02/01/87	19.293593	-96.680537	0	44204	2	1	1987	363265	0	22409	84132	270250	465484	0.385664009	0.45440957	0.35738115	25	47	Mesoamerica	Unequivocal early introduction	T	0.301329695	0	0.01858835	0.069787813	0.224173399	0.386120743	0.088376163
416	GBIF	PRESERVED_SPECIMEN	US	1322815080	SPECIES	Theobroma	cacao		Theobroma cacao L.	Shafer, J.A.	3428	02/01/10	22.670445	-79.8716837	1322815080	44209	2	1	1910	903891	0	7006	16993	51189	71622	0.009968721	-0.038081806	0.265322844	14	44	Antilles	Unequivocal late introduction	A	0.860274236	0	0.006667929	0.016173012	0.048718903	0.06816592	0.022840941
417	GBIF	PRESERVED_SPECIMEN	CEN	1095228206	SPECIES	Theobroma	cacao		Theobroma cacao L.	Cavalcanti, T.B.	3218	19/09/03	-15.7312666	-47.9029451	1095228206	44252	19	9	2003	55673	0	23099	66878	251441	563845	0.600281668	0.648484826	0.254142445	221	71	South American Atlantic coast	Unequivocal late introduction	G	0.057936221	0	0.024038021	0.069596727	0.261662587	0.586766444	0.093634748
418	GBIF	PRESERVED_SPECIMEN	INB	1253827363	SPECIES	Theobroma	cacao		Theobroma cacao L.	Santamaria, D. & Moraga, M.	s.n.	19/08/05	9.052491	-83.605778	0	44222	19	8	2005	336294	0	13956	33738	101317	719380	0.488029121	0.739880562	0.463435559	14	54	Puntarenas-Chiriquí province	Unequivocal early introduction	S	0.279155132	0	0.011584771	0.028005661	0.084102483	0.597151953	0.039590432
419	GBIF	PRESERVED_SPECIMEN	AAU	47855296	SPECIES	Theobroma	cacao		Theobroma cacao L.	Asanza, E.	s.n.	19/08/80	-0.25	-76.35	0	44260	19	8	1980	21255	0	1892	6179	27192	1149029	0.816607505	0.854238331	0.146636219	9	60	Napo province	Potential native area	U	0.017631001	0	0.001569412	0.005125474	0.022555736	0.953118377	0.006694886
420	GBIF	PRESERVED_SPECIMEN	HUA	1123902965	SPECIES	Theobroma	cacao		Theobroma cacao L.	Santa, J. & Sanchez, D.	1053	19/06/84	3.58613	-76.79658	1123902965	44225	19	6	1984	42281	0	9189	30115	116930	492551	0.633416899	0.712782443	0.22465369	9	58	Cauca province	Unequivocal early introduction	#N/A	0.061182289	0	0.013296849	0.043577603	0.169202363	0.712740896	0.056874452
422	GBIF	PRESERVED_SPECIMEN	K	1421197221	SPECIES	Theobroma	cacao		Theobroma cacao L.	Tello & Flores	341	19/12/89	-9.67	-75.03	0	44260	19	12	1989	36807	0	4856	13471	51197	1099250	0.794375545	0.864531994	0.193128183	6	67	Ucayali province	Potential native area	V	0.030530508	0	0.004027933	0.011173866	0.042466661	0.911801032	0.015201799
423	GBIF	PRESERVED_SPECIMEN	US	1320778709	SPECIES	Theobroma	cacao		Theobroma cacao L.	Prance, G.T.; et al.	8642	19/11/68	-10.6063623	-66.9855431	1320778709	44266	19	11	1968	2110	0	1020	4001	21024	626064	0.849000162	0.88846153	0.114367692	1	67	Rondônia province	Potential early introduction	K	0.00322522	0	0.001559111	0.006115689	0.032136028	0.956963952	0.0076748
424	GBIF	PRESERVED_SPECIMEN	FMB	1427548389	SPECIES	Theobroma	cacao		Theobroma cacao L.	Gonzalez, M.; et al.	2220	19/10/14	9.544472	-75.346361	1427546895	44263	19	10	2014	230113	0	7952	41983	417872	507316	0.443032984	0.547268271	0.372302785	9	53	Magdalena province	Unequivocal early introduction	R	0.190927752	0	0.006597878	0.034833842	0.346713839	0.42092669	0.04143172
425	GBIF	PRESERVED_SPECIMEN	DAV	2626923306	SPECIES	Theobroma	cacao		Theobroma cacao L.	Bayon, E.	3006	19/10/12	38.541667	-121.772222	0	44204	19	10	2012	156271	0	18029	98558	538423	394165	0.418898382	0.499245852	0.379875368	44	33	North America	Unequivocal late introduction	B	0.129637495	0	0.01495629	0.08176061	0.446658747	0.326986858	0.0967169
426	GBIF	PRESERVED_SPECIMEN	HURB	1303583835	SPECIES	Theobroma	cacao		Theobroma cacao L.	Victor Junior, V.	2216	19/01/13	-13.914655	-39.466046	0	44225	19	1	2013	99366	0	672	6660	152944	945299	0.673434088	0.814982414	0.340831112	216	70	South American Atlantic coast	Unequivocal late introduction	G	0.082465449	0	0.000557704	0.005527242	0.126930696	0.78451891	0.006084945
427	GBIF	PRESERVED_SPECIMEN	VIES	1090872901	SPECIES	Theobroma	cacao		Theobroma cacao L.	Alves, E.S.S.	20	19/01/01	-20.302988	-40.308919	0	44221	19	1	2001	554157	0	6378	19775	122905	502273	0.362676233	0.410660863	0.397652974	215	74	South American Atlantic coast	Unequivocal late introduction	G	0.459695161	0	0.005290803	0.016404145	0.101954561	0.41665533	0.021694948
428	GBIF	PRESERVED_SPECIMEN	US	1319980373	SPECIES	Theobroma	cacao		Theobroma cacao L.	Revilla, J.	2152	19/01/77	-10.7317689	-73.7585828	1319980373	44235	19	1	1977	23083	0	710	2571	10284	1168936	0.855203249	0.885384619	0.16387168	5	67	Rondônia province	Potential early introduction	K	0.019146737	0	0.000588926	0.002132576	0.008530306	0.969601455	0.002721503
429	GBIF	PRESERVED_SPECIMEN	US	1322337000	SPECIES	Theobroma	cacao		Theobroma cacao L.	Araujo-Murakami, A.C.; et al.	2977	18/09/06	-14.5672	-68.4875	1322337000	44235	18	9	2006	35129	0	10521	47035	225278	887568	0.714482611	0.839449525	0.228761561	2	70	Rondônia province	Potential early introduction	K	0.029139856	0	0.008727275	0.039016002	0.18687035	0.736246517	0.047743277
430	GBIF	PRESERVED_SPECIMEN	BRIT	216058495	SPECIES	Theobroma	cacao		Theobroma cacao L.	Transect	s.n.	18/09/06	-12.5441	-70.1051	0	44252	18	9	2006	13213	0	870	2866	9780	1178865	0.872079717	0.891252935	0.11648427	3	69	Rondônia province	Potential early introduction	K	0.010959743	0	0.000721636	0.002377251	0.008112184	0.977829186	0.003098887
431	GBIF	PRESERVED_SPECIMEN	U	2515775536	SPECIES	Theobroma	cacao		Theobroma cacao L.	Ellenberg, H.	2964	18/09/57	-11.3357	-75.3412	2515564991	44210	18	9	1957	45986	0	20840	132517	554618	451376	0.534641935	0.503438115	0.23827035	6	68	South American Atlantic coast	Unequivocal late introduction	G	0.038151986	0	0.01728977	0.109941867	0.460135215	0.374481162	0.127231637
432	GBIF	PRESERVED_SPECIMEN	US	1319021582	SPECIES	Theobroma	cacao		Theobroma cacao L.	Killip, E.P. & Smith, A.C.	29434	18/09/29	-3.7341173	-73.2517286	1228521815	44256	18	9	1929	64029	0	8404	27264	104842	1001049	0.705524528	0.806079984	0.23019889	6	63	Napo province	Potential native area	U	0.053110184	0	0.006970872	0.022614691	0.086963374	0.830340879	0.029585563
433	GBIF	PRESERVED_SPECIMEN	U	2517484094	SPECIES	Theobroma	cacao		Theobroma cacao L.	Snijders, J.C.	4872	18/09/20	2.0331027	-56.1337552	2517216080	44207	18	9	1920	12095	0	4185	13132	62351	482558	0.739709939	0.81506145	0.177291935	229	59	Roraima province	Potential early introduction	M	0.021059651	0	0.007286866	0.022865262	0.108564723	0.840223499	0.030152127
434	GBIF	PRESERVED_SPECIMEN	CEPEC	1944981326	SPECIES	Theobroma	cacao		Theobroma cacao L.	Nogueira, M.G.C.	268	18/08/14	-13.680278	-39.780556	0	44245	18	8	2014	10424	0	1969	5230	18603	196220	0.733989981	0.810083777	0.212403574	216	69	South American Atlantic coast	Unequivocal late introduction	G	0.044844824	0	0.008470785	0.022499849	0.080031491	0.844153051	0.030970634
435	GBIF	PRESERVED_SPECIMEN	COAH	1147300872	SPECIES	Theobroma	cacao		Theobroma cacao L.	C√°rdenas, D.; et al.	18927	18/07/06	1.39	-70.9	1147300872	44223	18	7	2006	7821	0	918	2991	34524	1157051	0.80628856	0.831309497	0.111617966	5	59	Imerí province	Potential early introduction	L	0.006499599	0	0.000762899	0.002485654	0.02869098	0.961560868	0.003248553
436	GBIF	PRESERVED_SPECIMEN	NY	1928354474	SPECIES	Theobroma	cacao		Theobroma cacao L.	Jong, W.	70	18/07/87	-4.92	-73.75	1928354474	44251	18	7	1987	53201	0	8794	28661	103005	1011908	0.71553712	0.807957888	0.218287162	6	63	Madeira province	Potential early introduction	J	0.04412937	0	0.007294481	0.023773836	0.085440983	0.839361331	0.031068317
438	GBIF	PRESERVED_SPECIMEN	MG	1314854526	SPECIES	Theobroma	cacao		Theobroma cacao L.	Pereira-Junior, R.A.	9	18/05/95	-1.339632647	-48.27541312	1314854526	44235	18	5	1995	24466	0	3042	13166	74906	1090018	0.775757741	0.848055363	0.204488549	223	61	Pará province	Potential early introduction	H	0.020293663	0	0.002523229	0.010920722	0.062131822	0.904130564	0.013443951
439	GBIF	PRESERVED_SPECIMEN	NY	1929834973	SPECIES	Theobroma	cacao		Theobroma cacao L.	Rios, M.	363	18/05/91	-0.97	-77.45	1929834973	44249	18	5	1991	79920	0	10980	27340	80213	1006289	0.715861168	0.815963745	0.227841836	9	61	Napo province	Potential native area	U	0.066337855	0	0.009113985	0.022693656	0.066581061	0.835273444	0.03180764
442	GBIF	PRESERVED_SPECIMEN	NY	1929026134	SPECIES	Theobroma	cacao		Theobroma cacao L.	Bennett, B.C.	3698	18/04/89	-3.5	-78.17	0	44251	18	4	1989	56295	0	7824	22563	66652	656095	0.735296758	0.858050048	0.254102339	9	62	Cauca province	Unequivocal early introduction	#N/A	0.069549028	0	0.009666073	0.027875206	0.082344468	0.810565226	0.037541279
444	GBIF	PRESERVED_SPECIMEN	MG	1314854332	SPECIES	Theobroma	cacao		Theobroma cacao L.	Urbinati, C.V.	4	18/02/94	-1.4365485	-48.4466246	1314854332	44235	18	2	1994	331693	0	8572	27035	185859	652409	0.410442507	0.658553213	0.55760358	223	61	Pará province	Potential early introduction	H	0.275134211	0	0.007110341	0.022425114	0.154167164	0.54116317	0.029535455
445	GBIF	PRESERVED_SPECIMEN	MG	1314854293	SPECIES	Theobroma	cacao		Theobroma cacao L.	Urbinati, C.V.	3	18/02/94	-1.3593093	-48.3172098	1314854293	44235	18	2	1994	331693	0	8572	27035	185859	652409	0.410442507	0.658553213	0.55760358	223	61	Pará province	Potential early introduction	H	0.275134211	0	0.007110341	0.022425114	0.154167164	0.54116317	0.029535455
446	GBIF	PRESERVED_SPECIMEN	US	1320548204	SPECIES	Theobroma	cacao		Theobroma cacao L.	Standley, P.C. & Valerio, J.	48644	18/02/26	10.123244	-83.534653	1320548204	44270	18	2	1926	218932	0	10788	29320	87309	859186	0.598333731	0.801474214	0.394370574	15	53	Pacific dominion	Unequivocal early introduction	Q	0.181605677	0	0.008948724	0.024321152	0.072423447	0.712701	0.033269876
448	GBIF	PRESERVED_SPECIMEN	LAGU	1585322743	SPECIES	Theobroma	cacao		Theobroma cacao L.	Galan, P.	s.n.	18/11/08	13.8	-89.38333	0	44260	18	11	2008	127532	0	7202	36165	377966	525552	0.541261439	0.593006968	0.272521498	19	50	Mesoamerica	Unequivocal early introduction	T	0.118698792	0	0.00670317	0.033660115	0.351787062	0.48915086	0.040363285
449	GBIF	PRESERVED_SPECIMEN	BANGEV	1417921385	SPECIES	Theobroma	cacao		Theobroma cacao L.	Disponible, N.O.	s.n.	18/11/84	14.836111	-92.353333	0	44218	18	11	1984	507936	0	2991	16663	137346	540652	0.298245816	0.501045316	0.513379714	21	50	Mesoamerica	Unequivocal early introduction	T	0.421318062	0	0.002480947	0.013821471	0.113924492	0.448455028	0.016302418
450	GBIF	PRESERVED_SPECIMEN	US	1322883871	SPECIES	Theobroma	cacao		Theobroma cacao L.	Asplund, E.	14583	18/11/40	-3.762236	-73.261837	0	44228	18	11	1940	64029	0	8404	27264	104842	1001049	0.705524528	0.806079984	0.23019889	6	63	Napo province	Potential native area	U	0.053110184	0	0.006970872	0.022614691	0.086963374	0.830340879	0.029585563
452	GBIF	PRESERVED_SPECIMEN	NY	1931380553	SPECIES	Theobroma	cacao		Theobroma cacao L.	Harriman, N.A.	17472	18/01/82	10.6319414	-61.2845409	1931380553	44245	18	1	1982	811040	0	11191	29923	86483	266780	0.116356153	-0.097701147	0.39572338	233	53	Pacific dominion	Unequivocal early introduction	Q	0.672829403	0	0.009283924	0.024823775	0.071745296	0.221317602	0.034107699
453	GBIF	PRESERVED_SPECIMEN	NY	1930417562	SPECIES	Theobroma	cacao		Theobroma cacao L.	Prance, G.T.; et al.	2378	17/09/66	-8.7516568	-67.3985275	1317999748	44249	17	9	1966	10132	0	431	1387	15258	1178388	0.845348066	0.867755711	0.111152511	2	66	Madeira province	Potential early introduction	J	0.008404142	0	0.0003575	0.001150468	0.012655981	0.977431909	0.001507968
454	GBIF	PRESERVED_SPECIMEN	F	1228532456	SPECIES	Theobroma	cacao		Theobroma cacao L.	Meneces, E.; et al.	188	17/08/76	-17.083333	-62.65	1228532456	44256	17	8	1976	9945	0	11977	98776	277623	807281	0.646671562	0.717396855	0.207785814	230	72	Rondônia province	Potential early introduction	K	0.008248991	0	0.009934456	0.081930853	0.230277488	0.669608212	0.091865309
455	GBIF	PRESERVED_SPECIMEN	CR	46082936	SUBSPECIES	Theobroma	cacao	Theobroma cacao. subsp. cacao	Theobroma cacao subsp. cacao	Burger, W.	s.n.	17/06/68	10.43	-84	0	44216	17	6	1968	182168	0	6323	18907	77364	920812	0.644865652	0.806669891	0.349812485	15	53	Pacific dominion	Unequivocal early introduction	Q	0.151104785	0	0.005244805	0.015682986	0.064171921	0.763795503	0.02092779
456	GBIF	PRESERVED_SPECIMEN	RB	1902144316	SPECIES	Theobroma	cacao		Theobroma cacao L.	Medeiros, T.K.A.	8	17/05/17	-10.805556	-65.008056	1902144316	44251	17	5	2017	19261	0	520	1686	41089	1143043	0.803792925	0.864366889	0.159686221	233	67	Madeira province	Potential early introduction	J	0.015976291	0	0.000431321	0.001398475	0.034081813	0.9481121	0.001829796
457	GBIF	PRESERVED_SPECIMEN	US	1319653083	SPECIES	Theobroma	cacao		Theobroma cacao L.	Schunke, J.V. & Graham, J.G.	16680	17/05/05	-8.23086	-76.4441	1228600718	44252	17	5	2005	40103	0	7269	18659	45054	743293	0.768173034	0.857848525	0.220633536	7	66	Ucayali province	Potential native area	V	0.04693824	0	0.008507944	0.02183928	0.052733099	0.869981437	0.030347223
458	GBIF	PRESERVED_SPECIMEN	ICN	2013949086	SPECIES	Theobroma	cacao		Theobroma cacao L.	Sanchez, M.; et al.	477	17/05/88	0.228420175	-73.27597212	768727857	44244	17	5	1988	3998	0	182	630	3102	1197688	0.84461434	0.850600839	0.074291343	7	60	Imerí province	Potential early introduction	L	0.003316191	0	0.000150962	0.000522561	0.002572993	0.993437293	0.000673524
459	GBIF	PRESERVED_SPECIMEN	COAH	768727857	SPECIES	Theobroma	cacao		Theobroma cacao L.	Sanchez, M.; et al.	477	17/05/88	-0.75	-71.89	768727857	44223	17	5	1988	9646	0	150	852	5264	1056454	0.820015111	0.835764468	0.126346866	6	60	Imerí province	Potential early introduction	L	0.008995063	0	0.000139878	0.000794505	0.004908772	0.985161782	0.000934382
460	GBIF	PRESERVED_SPECIMEN	INIF	1893418040	SPECIES	Theobroma	cacao		Theobroma cacao L.	L., A.G. & V. Garza, G.	s.n.	17/05/62	17.791667	-93.575	0	44221	17	5	1962	45001	0	5848	19150	122975	864524	0.691668806	0.751680374	0.220925482	22	48	Mesoamerica	Unequivocal early introduction	T	0.042554218	0	0.005530034	0.018108781	0.116288636	0.817518331	0.023638815
461	GBIF	PRESERVED_SPECIMEN	MEXU	1895556048	SPECIES	Theobroma	cacao		Theobroma cacao L.	Leija, L.G.	s.n.	17/04/62	17.789167	-93.544444	0	44222	17	4	1962	45001	0	5848	19150	122975	864524	0.691668806	0.751680374	0.220925482	22	48	Mesoamerica	Unequivocal early introduction	T	0.042554218	0	0.005530034	0.018108781	0.116288636	0.817518331	0.023638815
462	GBIF	PRESERVED_SPECIMEN	MG	1314854296	SPECIES	Theobroma	cacao		Theobroma cacao L.	Urbinati, C.V.	1	17/02/94	-1.4365807	-48.4378698	1314854296	44235	17	2	1994	331693	0	8572	27035	185859	652409	0.410442507	0.658553213	0.55760358	223	61	Pará province	Potential early introduction	H	0.275134211	0	0.007110341	0.022425114	0.154167164	0.54116317	0.029535455
464	GBIF	PRESERVED_SPECIMEN	HUA	1123904602	SPECIES	Theobroma	cacao		Theobroma cacao L.	Soejarto, D.	2232	17/11/69	4.799828	-75.84938	1123904526	44225	17	11	1969	2600	0	3204	11136	81683	148182	0.617210728	0.649656951	0.179902177	9	57	Cauca province	Unequivocal early introduction	#N/A	0.010534633	0	0.012981909	0.045120642	0.33096169	0.600401126	0.058102551
465	GBIF	PRESERVED_SPECIMEN	RB	1844893351	SPECIES	Theobroma	cacao		Theobroma cacao L.	Medeiros, H.; et al.	2639	17/10/17	-9.168889	-68.951111	0	44266	17	10	2017	48468	0	11792	31055	108409	1005865	0.72156287	0.822488785	0.204461702	2	66	Rondônia province	Potential early introduction	K	0.040202756	0	0.009781111	0.025759193	0.089922022	0.834334918	0.035540304
466	GBIF	PRESERVED_SPECIMEN	CR	46084218	SUBSPECIES	Theobroma	cacao	Theobroma cacao. subsp. cacao	Theobroma cacao subsp. cacao	Frances, A.	s.n.	17/10/02	8.85	-83.1	0	44216	17	10	2002	547859	0	7444	19201	55823	574428	0.294851329	0.481288642	0.559418581	14	54	Puntarenas-Chiriquí province	Unequivocal early introduction	S	0.454747231	0	0.00617885	0.01593768	0.046335562	0.476800677	0.02211653
467	GBIF	PRESERVED_SPECIMEN	NY	1929935982	SPECIES	Theobroma	cacao		Theobroma cacao L.	Forero, E.	7117	16/08/68	-10.438858	-62.472556	1320985922	44239	16	8	1968	16947	0	6569	21826	134614	1025644	0.706851937	0.728319496	0.156553139	231	67	Madeira province	Potential early introduction	J	0.014056901	0	0.005448739	0.018103849	0.111657266	0.850733245	0.023552588
468	GBIF	PRESERVED_SPECIMEN	MEXU	1895556036	SPECIES	Theobroma	cacao		Theobroma cacao L.	Leija, L.G.	s.n.	16/06/62	17.98055268	-93.04526161	0	44222	16	6	1962	45001	0	5848	19150	122975	864524	0.691668806	0.751680374	0.220925482	22	48	Mesoamerica	Unequivocal early introduction	T	0.042554218	0	0.005530034	0.018108781	0.116288636	0.817518331	0.023638815
469	GBIF	PRESERVED_SPECIMEN	AAU	47855887	SPECIES	Theobroma	cacao		Theobroma cacao L.	Holm-Nielsen, L.B.	s.n.	16/05/68	-1.333	-79.9	0	44260	16	5	1968	8528	0	7855	51911	228772	114424	0.481402914	0.474932939	0.180137392	11	61	Pacific dominion	Unequivocal early introduction	Q	0.020724683	0	0.019089164	0.126153734	0.555960048	0.278072371	0.145242898
470	GBIF	PRESERVED_SPECIMEN	WAG	2626730361	SPECIES	Theobroma	cacao		Theobroma cacao L.	Leeuwenberg, A.J.M.	s.n	16/05/61	52.0330977	4.5322907	2626730361	44204	16	5	1961	59409	0	23351	79908	425624	617207	0.566092119	0.607077062	0.254149291	198	24	Europe	Unequivocal late introduction	C	0.049281667	0	0.019370402	0.066286243	0.353068729	0.511992959	0.085656645
471	GBIF	PRESERVED_SPECIMEN	ASE	2464818923	SPECIES	Theobroma	cacao		Theobroma cacao L.	Carmo, V.S.; et al.	42	16/04/14	-14.4311	-39.2155	0	44211	16	4	2014	99366	0	672	6660	152944	945299	0.673434088	0.814982414	0.340831112	215	70	South American Atlantic coast	Unequivocal late introduction	G	0.082465449	0	0.000557704	0.005527242	0.126930696	0.78451891	0.006084945
472	GBIF	PRESERVED_SPECIMEN	HUESB	2236798508	SPECIES	Theobroma	cacao		Theobroma cacao L.	Carmo, V.S.; et al.	34	16/04/14	-14.720278	-39.366111	0	44242	16	4	2014	140721	0	6661	25484	176828	855630	0.644052284	0.763287425	0.315930606	216	70	South American Atlantic coast	Unequivocal late introduction	G	0.116749521	0	0.005526315	0.021142863	0.146705782	0.709875519	0.026669178
473	GBIF	PRESERVED_SPECIMEN	MG	1314850918	SPECIES	Theobroma	cacao		Theobroma cacao L.	Pires, J.M.; et al.	875	16/04/86	-0.95	-52.75	1042589432	44235	16	4	1986	110608	0	6867	25209	111703	951172	0.669523588	0.825607061	0.333637434	226	61	Roraima province	Potential early introduction	M	0.091748309	0	0.005696113	0.020910631	0.092656602	0.788988345	0.026606744
474	GBIF	PRESERVED_SPECIMEN	L	2514382887	SPECIES	Theobroma	cacao		Theobroma cacao L.	Britton, B.B.	19449	16/04/53	13.5018907	120.95412	2514382887	44214	16	4	1953	799781	0	14258	41194	119811	230135	0.079648052	-0.142857149	0.401854258	116	51	Asia	Unequivocal late introduction	E	0.663620093	0	0.011830608	0.034180815	0.099413448	0.190955037	0.046011422
475	GBIF	PRESERVED_SPECIMEN	COL	1934704201	SPECIES	Theobroma	cacao		Theobroma cacao L.	Idrobo, J.M.	2430	16/03/57	3.318787143	-72.96614806	1934704201	44245	16	3	1957	8694	0	2255	20765	507251	666637	0.625322372	0.624751806	0.151809483	7	58	Pacific dominion	Unequivocal early introduction	Q	0.007211335	0	0.001870435	0.01722376	0.420744989	0.552949481	0.019094195
476	GBIF	PRESERVED_SPECIMEN	HBRA	1090586906	SPECIES	Theobroma	cacao		Theobroma cacao L.	Silva, A.R.	70	16/02/13	-0.964028	-46.878472	0	44260	16	2	2013	4004	0	1325	6991	54647	539080	0.764412992	0.804806292	0.155160309	222	61	Pará province	Potential early introduction	H	0.006606748	0	0.002186299	0.011535409	0.090169574	0.889501969	0.013721708
477	GBIF	PRESERVED_SPECIMEN	XAL	2629526092	SPECIES	Theobroma	cacao		Theobroma cacao L.	Castillo-Campos, G.	s.n.	16/02/85	16.099444	-90.951667	0	44204	16	2	1985	13479	0	2578	7616	24639	158924	0.67289971	0.78015855	0.234221761	20	49	Mesoamerica	Unequivocal early introduction	T	0.065041788	0	0.012439924	0.036750372	0.118893436	0.766874481	0.049190295
479	GBIF	PRESERVED_SPECIMEN	MA	1936697418	SPECIES	Theobroma	cacao		Theobroma cacao L.	L. Cayola, A.A.P.M.	673	16/12/03	-14.4592	-67.9472	0	44245	16	12	2003	20520	0	3262	11919	60810	676220	0.78398279	0.877406955	0.204043869	1	70	Rondônia province	Potential early introduction	K	0.026555166	0	0.004221391	0.015424514	0.078694915	0.875104014	0.019645905
480	GBIF	PRESERVED_SPECIMEN	US	1321950578	SPECIES	Theobroma	cacao		Theobroma cacao L.	Lau, J.	1749	16/12/85	21.3168139	-157.8590314	1321950578	44238	16	12	1985	461079	0	30315	56015	102742	42881	0.086464586	0.035714287	0.282862401	64	45	Oceania and Pacific islands	Unequivocal late introduction	F	0.665306941	0	0.043742569	0.080825994	0.148250009	0.061874488	0.124568562
481	GBIF	PRESERVED_SPECIMEN	US	1321193778	SPECIES	Theobroma	cacao		Theobroma cacao L.	Allen, C.	880	16/12/24	10.4113014	-74.4056612	1321193778	44239	16	12	1924	47537	0	1738	36063	404272	506855	0.565063741	0.605617642	0.291839147	9	53	Pacific dominion	Unequivocal early introduction	Q	0.047705639	0	0.001744166	0.036190935	0.405706171	0.508653089	0.037935101
482	GBIF	PRESERVED_SPECIMEN	COAH	1932878481	SPECIES	Theobroma	cacao		Theobroma cacao L.	Restrepo, M.J.	219	16/11/01	-3.83	-70.23	1932878481	44223	16	11	2001	45405	0	6479	20991	72181	650100	0.692628188	0.798938602	0.245448333	4	63	Imerí province	Potential early introduction	L	0.057102003	0	0.008148087	0.026398593	0.090775898	0.817575419	0.03454668
483	GBIF	PRESERVED_SPECIMEN	U	2515609139	SPECIES	Theobroma	cacao		Theobroma cacao L.	Proctor GR	18348	16/11/58	18.0669654	-77.5160788	2515609139	44210	16	11	1958	944525	0	2028	6605	39060	213124	-0.090692176	-0.291139245	0.449203257	12	47	Antilles	Unequivocal late introduction	A	0.78361577	0	0.00168251	0.005479773	0.03240574	0.176816207	0.007162283
484	GBIF	PRESERVED_SPECIMEN	US	2284341444	SPECIES	Theobroma	cacao		Theobroma cacao L.	Cuatrecasas, J. & Willard, L.	26492	16/10/61	3.4151974	-76.5625501	2284341444	44223	16	10	1961	42281	0	9189	30115	116930	492551	0.633416899	0.712782443	0.22465369	9	58	Cauca province	Unequivocal early introduction	#N/A	0.061182289	0	0.013296849	0.043577603	0.169202363	0.712740896	0.056874452
485	GBIF	PRESERVED_SPECIMEN	MEXU	1894542152	SPECIES	Theobroma	cacao		Theobroma cacao L.	G. Aguilar, M. & J. Aguilar, M.	s.n.	16/01/03	16.998611	-91.295833	0	44222	16	1	2003	39288	0	7254	23178	83603	1052244	0.749618029	0.825641036	0.189610444	21	48	Mesoamerica	Unequivocal early introduction	T	0.032588815	0	0.006017086	0.019225808	0.069347452	0.872820839	0.025242894
486	GBIF	PRESERVED_SPECIMEN	CEPEC	1090475235	SPECIES	Theobroma	cacao		Theobroma cacao L.	Jardim, J.G.	1949	16/01/99	-15.166667	-39.583333	0	44252	16	1	1999	140721	0	6661	25484	176828	855630	0.644052284	0.763287425	0.315930606	216	70	South American Atlantic coast	Unequivocal late introduction	G	0.116749521	0	0.005526315	0.021142863	0.146705782	0.709875519	0.026669178
487	GBIF	PRESERVED_SPECIMEN	INB	1253905981	SPECIES	Theobroma	cacao		Theobroma cacao L.	Quiros, J.F.M. & Villalobos, N.A.Z.	s.n.	15/09/11	9.997522	-83.099589	0	44222	15	9	2011	728580	0	705	2609	17814	454937	0.274036815	-0.037151702	0.439671197	14	53	Pacific dominion	Unequivocal early introduction	Q	0.604808886	0	0.000585235	0.002165783	0.014787759	0.377652337	0.002751018
488	GBIF	PRESERVED_SPECIMEN	ECO-SC-H	1893760882	SPECIES	Theobroma	cacao		Theobroma cacao L.	Gomez, M.J.M.	s.n.	15/09/97	17.12168292	-92.05965471	0	44251	15	9	1997	20041	0	1704	5775	69219	1108831	0.759925317	0.797442436	0.170527201	21	48	Mesoamerica	Unequivocal early introduction	T	0.016623672	0	0.001413439	0.004790265	0.057415994	0.91975663	0.006203704
489	GBIF	PRESERVED_SPECIMEN	FAUC	1576175278	SPECIES	Theobroma	cacao		Theobroma cacao L.	Montoya, J.C.	32	15/09/81	5.612653	-75.533077	0	44249	15	9	1981	12208	0	3250	10309	124422	948954	0.730005157	0.774602294	0.14826789	9	56	Cauca province	Unequivocal early introduction	#N/A	0.011106835	0	0.002956849	0.009379125	0.113199101	0.863358089	0.012335974
490	GBIF	PRESERVED_SPECIMEN	WAG	2515965583	SPECIES	Theobroma	cacao		Theobroma cacao L.	Towns, A.M. & Vliet, E.	872	15/08/12	2.171111	12.062222	2515965583	44210	15	8	2012	36214	0	10766	32440	107257	1018921	0.733692075	0.816204846	0.191708204	185	58	Africa	Unequivocal late introduction	D	0.030038205	0	0.008930008	0.026907808	0.088965808	0.84515817	0.035837817
491	GBIF	PRESERVED_SPECIMEN	CSRS	2234865708	SPECIES	Theobroma	cacao		Theobroma cacao L.	Csrs	s.n.	15/08/97	6.5	-3.5	0	44228	15	8	1997	38553	0	15880	53714	481494	615959	0.556520031	0.603068709	0.155730148	195	56	Africa	Unequivocal late introduction	D	0.031978268	0	0.013171865	0.044553749	0.399381221	0.510914897	0.057725614
492	GBIF	PRESERVED_SPECIMEN	XAL	2629688577	SPECIES	Theobroma	cacao		Theobroma cacao L.	E., M.M.S.; et al.	s.n.	15/07/92	16.101667	-90.96	0	44204	15	7	1992	13479	0	2578	7616	24639	158924	0.67289971	0.78015855	0.234221761	20	49	Mesoamerica	Unequivocal early introduction	T	0.065041788	0	0.012439924	0.036750372	0.118893436	0.766874481	0.049190295
495	GBIF	PRESERVED_SPECIMEN	XAL	2629725383	SPECIES	Theobroma	cacao		Theobroma cacao L.	Solheim, S.L.	s.n.	15/06/84	18.4	-95.15	0	44204	15	6	1984	308038	0	1419	8421	86750	592166	0.367870908	0.678561151	0.550545895	23	47	Mesoamerica	Unequivocal early introduction	T	0.309028746	0	0.001423564	0.008448085	0.087029015	0.59407059	0.009871649
496	GBIF	PRESERVED_SPECIMEN	UNA	56676966	SPECIES	Theobroma	cacao		Theobroma cacao L.	Meigs, D.L.L.W.R.	s.n.	15/06/81	14.75694	-87.60973	0	44266	15	6	1981	6863	0	1798	17848	326681	852379	0.670618192	0.702143669	0.162774711	18	50	Mesoamerica	Unequivocal early introduction	T	0.005692748	0	0.001491412	0.014804628	0.270976609	0.707034604	0.016296039
497	GBIF	PRESERVED_SPECIMEN	INPA	1042612429	SPECIES	Theobroma	cacao		Theobroma cacao L.	Proc√≥pio, L.C.; et al.	315	15/05/00	-3.529011	-65.48	1042612429	44266	15	5	2000	23610	0	1525	5606	22785	1152070	0.809804092	0.848119259	0.162774702	1	62	Madeira province	Potential early introduction	J	0.019583675	0	0.001264935	0.004649982	0.018899366	0.955602042	0.005914917
498	GBIF	PRESERVED_SPECIMEN	ASE	2464819229	SPECIES	Theobroma	cacao		Theobroma cacao L.	Carmo, V.S.; et al.	12	15/04/14	-14.4313	-39.2157	0	44211	15	4	2014	99366	0	672	6660	152944	945299	0.673434088	0.814982414	0.340831112	215	70	South American Atlantic coast	Unequivocal late introduction	G	0.082465449	0	0.000557704	0.005527242	0.126930696	0.78451891	0.006084945
499	GBIF	PRESERVED_SPECIMEN	COL	2013770109	SPECIES	Theobroma	cacao		Theobroma cacao L.	Holliday, P.C. & Cope, F.W.	T104	15/04/53	2.1136446	-74.7732056	1321008197	44239	15	4	1953	16744	0	4448	20596	179279	984207	0.713247716	0.749163032	0.165046296	8	58	Imerí province	Potential early introduction	L	0.013892277	0	0.003690447	0.017088231	0.14874543	0.816583615	0.020778678
500	GBIF	PRESERVED_SPECIMEN	COAH	768757279	SPECIES	Theobroma	cacao		Theobroma cacao L.	C√°rdenas, D.; et al.	11262	15/03/99	-2.62	-70.21	768757279	44216	15	3	1999	46935	0	9214	27403	84863	944676	0.71836514	0.811965823	0.226984099	4	62	Imerí province	Potential early introduction	L	0.042166364	0	0.00827785	0.024618832	0.076240846	0.848696108	0.032896681
501	GBIF	PRESERVED_SPECIMEN	COAH	768723025	SPECIES	Theobroma	cacao		Theobroma cacao L.	Pab√≥n, M.E.	874	15/11/79	-1.18	-69.87	768723025	44223	15	11	1979	95584	0	14045	36788	114974	944176	0.672596348	0.799766243	0.269713641	4	61	Imerí province	Potential early introduction	L	0.079285515	0	0.01165012	0.030515102	0.095369233	0.783180031	0.042165222
502	GBIF	PRESERVED_SPECIMEN	XAL	2629688910	SPECIES	Theobroma	cacao		Theobroma cacao L.	F. Vazquez, B. & S. Avendano, R.	s.n.	15/01/84	16.75	-91.133333	0	44204	15	1	1984	39288	0	7254	23178	83603	1052244	0.749618029	0.825641036	0.189610444	20	48	Mesoamerica	Unequivocal early introduction	T	0.032588815	0	0.006017086	0.019225808	0.069347452	0.872820839	0.025242894
503	GBIF	PRESERVED_SPECIMEN	US	1321574293	SPECIES	Theobroma	cacao		Theobroma cacao L.	Standley, P.C.	31104	15/01/24	9.364024	-79.959267	1321574293	44239	15	1	1924	241630	0	2318	5530	11473	37421	0.070046861	-0.066420667	0.298634729	12	54	Pacific dominion	Unequivocal early introduction	Q	0.809828	0	0.007768825	0.018533911	0.038452	0.125417264	0.026302736
504	GBIF	PRESERVED_SPECIMEN	INB	1253816380	SPECIES	Theobroma	cacao		Theobroma cacao L.	Quiros, J.F.M. & Gonzalez, J.	s.n.	14/09/03	9.705556	-84.365278	0	44222	14	9	2003	825917	0	2208	5408	39722	236017	0.018597712	-0.193548381	0.436969101	15	53	Puntarenas-Chiriquí province	Unequivocal early introduction	S	0.744557692	0	0.001990495	0.00487527	0.035809071	0.212767473	0.006865764
505	GBIF	PRESERVED_SPECIMEN	WAG	2517734763	SPECIES	Theobroma	cacao		Theobroma cacao L.	Towns, A.M.	Towns,-AM-1205	14/08/12	2.180278	12.069444	2516208141	44207	14	8	2012	36214	0	10766	32440	107257	1018921	0.733692075	0.816204846	0.191708204	185	58	Africa	Unequivocal late introduction	D	0.030038205	0	0.008930008	0.026907808	0.088965808	0.84515817	0.035837817
506	GBIF	PRESERVED_SPECIMEN	US	1321980143	FORM	Theobroma	cacao	Theobroma cacao f. lacandonense Cuatrec.	Theobroma cacao L.	Mart√≠nez, E.S.; et al.	22709	14/07/88	15.3393023	-89.7309534	1321980143	44238	14	7	1988	64860	0	21231	113362	378988	626960	0.567710147	0.618487418	0.238181883	19	49	Mesoamerica	Unequivocal early introduction	T	0.05380782	0	0.017613226	0.094045052	0.314408234	0.520125668	0.111658278
507	GBIF	PRESERVED_SPECIMEN	UCR	2422534655	SPECIES	Theobroma	cacao		Theobroma cacao L.	Flores, J.S. & Gomez-Pompa, A.	11311	14/07/87	20.51642311	-88.74999118	0	44215	14	7	1987	435	0	309	2681	60243	1141935	0.759882133	0.782736361	0.088506794	20	46	Mesoamerica	Unequivocal early introduction	T	0.000360815	0	0.000256303	0.002223783	0.049969186	0.947189912	0.002480087
508	GBIF	PRESERVED_SPECIMEN	US	1319065872	SPECIES	Theobroma	cacao		Theobroma cacao L.	Lengenhein, J.H.	3289	14/07/53	6.997513	-73.3756204	1319065872	44214	14	7	1953	27806	0	3996	21162	172975	979639	0.709621319	0.770133555	0.197063739	8	55	Magdalena province	Unequivocal early introduction	R	0.023064455	0	0.003314593	0.017553406	0.143478896	0.81258865	0.020867999
509	GBIF	PRESERVED_SPECIMEN	HUAZ	1135158984	SPECIES	Theobroma	cacao		Theobroma cacao L.	Frausin, G.	222	14/06/04	1.593806	-75.648597	0	44225	14	6	2004	53112	0	7134	38315	208695	898313	0.645858117	0.691591322	0.200438716	8	59	Napo province	Potential native area	U	0.044055546	0	0.005917538	0.031781673	0.173109129	0.745136114	0.037699211
512	GBIF	PRESERVED_SPECIMEN	US	1319042715	SPECIES	Theobroma	cacao		Theobroma cacao L.	Scolnik, R.; et al.	19An526	14/05/49	6.4895388	-74.4047587	1319042715	44225	14	5	1949	64872	0	16304	55410	328746	740243	0.614404386	0.664611578	0.224985237	8	56	Magdalena province	Unequivocal early introduction	R	0.053810008	0	0.013523837	0.045961471	0.272688136	0.614016548	0.059485308
513	GBIF	PRESERVED_SPECIMEN	US	1322812454	SPECIES	Theobroma	cacao		Theobroma cacao L.	Schunke, J.V. & Graham, J.G.	16633	14/04/05	-8.15056	-76.4919	1322812454	44229	14	4	2005	36424	0	4982	13022	50177	746529	0.75128128	0.829402506	0.201735917	8	66	Ucayali province	Potential native area	V	0.042794672	0	0.005853367	0.015299589	0.058953114	0.877099258	0.021152956
514	GBIF	PRESERVED_SPECIMEN	XAL	2629684190	SPECIES	Theobroma	cacao		Theobroma cacao L.	Castillo-Campos, G.	s.n.	14/02/85	16.180556	-90.941667	0	44204	14	2	1985	1418	0	71	233	11261	438898	0.849171594	0.89235127	0.107266122	20	49	Mesoamerica	Unequivocal early introduction	T	0.003137994	0	0.000157121	0.000515622	0.024920278	0.971268985	0.000672743
515	GBIF	PRESERVED_SPECIMEN	XAL	2629649680	SUBSPECIES	Theobroma	cacao		Theobroma cacao subsp. cacao	Solheim, S.L.; et al.	s.n.	14/12/83	16.15	-97.133333	0	44204	14	12	1983	595966	0	3241	10520	95460	497071	0.227572094	0.203683771	0.530362423	24	49	Mesoamerica	Unequivocal early introduction	T	0.495705581	0	0.002695761	0.008750202	0.079400595	0.413447862	0.011445963
516	GBIF	PRESERVED_SPECIMEN	EAFM	1095266808	SPECIES	Theobroma	cacao		Theobroma cacao L.	Gurgel-Silva, E. & Dantas, F.M.	284	14/11/10	-3.081406	-59.929411	0	44252	14	11	2010	135190	0	4631	14251	68494	857415	0.646253137	0.841756701	0.410128487	231	62	Roraima province	Potential early introduction	M	0.125178128	0	0.004288038	0.013195603	0.063421486	0.793916745	0.017483641
517	GBIF	PRESERVED_SPECIMEN	COL	1890958562	SPECIES	Theobroma	cacao		Theobroma cacao L.	Cuatrecasas, J.	7756	14/11/39	2.5677606	-72.6396535	1228351884	44249	14	11	1939	6343	0	322	1536	71873	1125524	0.7592053	0.802800477	0.108903987	7	58	Imerí province	Potential early introduction	L	0.005261289	0	0.000267087	0.001274057	0.059616058	0.933581509	0.001541144
518	GBIF	PRESERVED_SPECIMEN	MG	1314839719	SPECIES	Theobroma	cacao		Theobroma cacao L.	G√©ly, A.; et al.	1363	14/01/85	-1.498574063	-48.6339466	1314839719	44238	14	1	1985	331693	0	8572	27035	185859	652409	0.410442507	0.658553213	0.55760358	224	61	Pará province	Potential early introduction	H	0.275134211	0	0.007110341	0.022425114	0.154167164	0.54116317	0.029535455
519	GBIF	PRESERVED_SPECIMEN	L	2516383783	SPECIES	Theobroma	cacao		Theobroma cacao L.	Dihm, H.	272	14/1/1899	-6.604009	106.796883	2516383783	44209	14	1	1899	356039	0	14930	52166	226985	555452	0.399941821	0.561941415	0.378201949	122	65	Asia	Unequivocal late introduction	E	0.295327861	0	0.012384163	0.043270746	0.18827992	0.46073731	0.055654909
520	GBIF	PRESERVED_SPECIMEN	US	2397774709	SPECIES	Theobroma	cacao	Theobroma cacao. subsp. Sphaerocarpum	Theobroma cacao L.	Beck, S.G.	4789	13/09/81	-16.4029357	-67.641635	2397774709	44221	13	9	1981	147781	0	82381	258160	348501	368473	0.431249486	0.36863789	0.266430981	1	71	Rondônia province	Potential early introduction	K	0.122609716	0	0.068349186	0.21418805	0.289141423	0.305711626	0.282537236
521	GBIF	PRESERVED_SPECIMEN	COAH	768765823	SPECIES	Theobroma	cacao		Theobroma cacao L.	Ramirez, J.G.; et al.	8421	13/07/04	2.434963889	-74.59753333	768765823	44216	13	7	2004	16744	0	4448	20596	179279	984207	0.713247716	0.749163032	0.165046296	8	58	Imerí province	Potential early introduction	L	0.013892277	0	0.003690447	0.017088231	0.14874543	0.816583615	0.020778678
522	GBIF	PRESERVED_SPECIMEN	HUA	1123883607	SPECIES	Theobroma	cacao		Theobroma cacao L.	Vargas, W.	6317	13/07/99	5.565939	-74.909806	1123883607	44225	13	7	1999	28236	0	3710	13044	275986	884611	0.685555121	0.736332417	0.187832974	8	56	Magdalena province	Unequivocal early introduction	R	0.023420956	0	0.003077339	0.010819626	0.228922508	0.733759571	0.013896965
524	GBIF	PRESERVED_SPECIMEN	UADY	1893444438	SPECIES	Theobroma	cacao		Theobroma cacao L.	Disponible, N.O.	s.n.	13/06/91	20.591667	-88.791667	0	44221	13	6	1991	435	0	309	2681	60243	1141935	0.759882133	0.782736361	0.088506794	20	46	Mesoamerica	Unequivocal early introduction	T	0.000360815	0	0.000256303	0.002223783	0.049969186	0.947189912	0.002480087
525	GBIF	PRESERVED_SPECIMEN	AK	1897735843	SPECIES	Theobroma	cacao		Theobroma cacao L.	Brumbach, W.C.	s.n.	13/06/74	40.333333	-75.95	0	44218	13	6	1974	80253	0	35296	160907	541367	49986	0.358695966	0.385925084	0.204689992	14	32	North America	Unequivocal late introduction	B	0.092477723	0	0.040672544	0.185417529	0.623831972	0.057600232	0.226090073
526	GBIF	PRESERVED_SPECIMEN	L	2516731838	SPECIES	Theobroma	cacao		Theobroma cacao L.	Heilbron, T.J.; et al.	28	13/04/12	5.788833	-54.967833	2516731838	44209	13	4	2012	445639	0	5382	16396	60224	654207	0.362025371	0.727558285	0.5670536	229	56	Guianan Lowlands province	Potential early introduction	N	0.37706964	0	0.004553885	0.013873188	0.050957484	0.553545803	0.018427074
527	GBIF	PRESERVED_SPECIMEN	US	1319640954	SPECIES	Theobroma	cacao		Theobroma cacao L.	Vigo, J.S. & Graham, J.G.	16628	13/04/05	-8.15264	-76.49	1319640954	44270	13	4	2005	36424	0	4982	13022	50177	746529	0.75128128	0.829402506	0.201735917	8	66	Ucayali province	Potential native area	V	0.042794672	0	0.005853367	0.015299589	0.058953114	0.877099258	0.021152956
528	GBIF	PRESERVED_SPECIMEN	US	1320615421	SPECIES	Theobroma	cacao		Theobroma cacao L.	Graham, J.G.	5027	13/11/07	-9.3572	-74.4389	1320615421	44266	13	11	2007	102159	0	11466	29519	70290	966988	0.7223173	0.852541745	0.279468936	6	66	Rondônia province	Potential early introduction	K	0.086544473	0	0.009713475	0.025007158	0.059546501	0.819188392	0.034720634
530	GBIF	PRESERVED_SPECIMEN	US	1320078312	SPECIES	Theobroma	cacao		Theobroma cacao L.	Carrington, C.M.S.	2398	13/10/14	13.1856	-59.583	1320078312	44270	13	10	2014	966248	0	4737	10001	21874	21230	0.024504432	-0.004926108	0.137559457	233	51	North America	Unequivocal late introduction	B	0.943518636	0	0.00462557	0.009765743	0.021359451	0.0207306	0.014391313
531	GBIF	PRESERVED_SPECIMEN	COAH	1324645952	SPECIES	Theobroma	cacao		Theobroma cacao L.	V√©lez, G. & Castro, B.	160	13/10/92	-0.6	-72.36	1324645952	44223	13	10	1992	11954	0	246	901	26466	1166027	0.799760414	0.824206471	0.120056907	6	60	Imerí province	Potential early introduction	L	0.009915444	0	0.000204049	0.000747349	0.021952664	0.967180494	0.000951398
532	GBIF	PRESERVED_SPECIMEN	NY	1929292587	SPECIES	Theobroma	cacao		Theobroma cacao L.	Lowrie, S.R.; et al.	521	13/10/80	-9.68	-67.65	1421197235	44249	13	10	1980	2874	0	582	3225	32352	1166570	0.822676127	0.87308532	0.107555689	2	67	Madeira province	Potential early introduction	J	0.002383869	0	0.000482746	0.00267501	0.026834704	0.96762367	0.003157756
533	GBIF	PRESERVED_SPECIMEN	US	2284222623	SPECIES	Theobroma	cacao		Theobroma cacao L.	Acevedo-Rodriguez, P. & Smith, S.F.	8718	13/01/97	-11.7856	-72.6992	1318861389	44224	13	1	1997	65278	0	11921	29526	67537	1028907	0.77605534	0.878363431	0.235993935	5	68	Rondônia province	Potential early introduction	K	0.054255055	0	0.009908001	0.024540193	0.056132597	0.855164154	0.034448195
534	GBIF	PRESERVED_SPECIMEN	US	2284178646	SPECIES	Theobroma	cacao		Theobroma cacao L.	J. Cuatrecasas, T.R.S. & Soria, J.	27103	13/01/69	1.485694	-75.723179	1322305800	44224	13	1	1969	53112	0	7134	38315	208695	898313	0.645858117	0.691591322	0.200438716	8	59	Napo province	Potential native area	U	0.044055546	0	0.005917538	0.031781673	0.173109129	0.745136114	0.037699211
536	GBIF	PRESERVED_SPECIMEN	INB	1253596440	SPECIES	Theobroma	cacao		Theobroma cacao L.	Quiros, J.F.M.	s.n.	12/08/92	9.6975	-84.395556	0	44222	12	8	1992	825917	0	2208	5408	39722	236017	0.018597712	-0.193548381	0.436969101	15	53	Puntarenas-Chiriquí province	Unequivocal early introduction	S	0.744557692	0	0.001990495	0.00487527	0.035809071	0.212767473	0.006865764
537	GBIF	PRESERVED_SPECIMEN	ENCB	1896072645	SPECIES	Theobroma	cacao		Theobroma cacao L.	Guadarrama, M.A.	s.n.	12/07/86	18.018333	-93.366389	0	44228	12	7	1986	757149	0	7452	18907	80955	338708	0.152535399	-0.088372096	0.433677244	22	48	Mesoamerica	Unequivocal early introduction	T	0.629294589	0	0.006193633	0.015714308	0.0672847	0.281512769	0.021907942
538	GBIF	PRESERVED_SPECIMEN	MEXU	1895556051	SPECIES	Theobroma	cacao		Theobroma cacao L.	Maria, O.	s.n.	12/07/86	18.14947141	-93.65804599	0	44222	12	7	1986	759144	0	1650	6435	60734	376575	0.03975665	-0.161825731	0.568289735	22	47	Mesoamerica	Unequivocal early introduction	T	0.630236655	0	0.00136982	0.005342297	0.050420991	0.312630237	0.006712117
540	GBIF	PRESERVED_SPECIMEN	US	1317816667	SPECIES	Theobroma	cacao		Theobroma cacao L.	Mwanagoka, M. & Maingo, A.	1358	12/06/00	-4.9378	38.7275	1317816667	44271	12	6	2000	79683	0	13552	38832	270720	802797	0.618831551	0.682027191	0.237665638	166	63	Africa	Unequivocal late introduction	D	0.066094938	0	0.011241025	0.032210116	0.22455507	0.665898851	0.043451141
541	GBIF	PRESERVED_SPECIMEN	XAL	2629720253	SPECIES	Theobroma	cacao		Theobroma cacao L.	Solheim, S.L. & M. Chazaro, B.	s.n.	12/06/84	19.311944	-96.7	0	44204	12	6	1984	363265	0	22409	84132	270250	465484	0.385664009	0.45440957	0.35738115	25	47	Mesoamerica	Unequivocal early introduction	T	0.301329695	0	0.01858835	0.069787813	0.224173399	0.386120743	0.088376163
542	GBIF	PRESERVED_SPECIMEN	BR	2243188334	SPECIES	Theobroma	cacao		Theobroma cacao L.	Ouattara, K.	26	12/05/04	5.3408557	-4.133465	2243188334	44242	12	5	2004	9244	0	4413	13248	87518	1091179	0.681829631	0.708200425	0.105593032	196	56	Africa	Unequivocal late introduction	D	0.007667539	0	0.003660412	0.010988701	0.072592779	0.905090569	0.014649113
543	GBIF	PRESERVED_SPECIMEN	US	1322466933	SPECIES	Theobroma	cacao		Theobroma cacao L.	Vigo, J.S. & Graham, J.G.	16621	12/04/05	-8.152633333	-76.49001667	1322466933	44235	12	4	2005	36424	0	4982	13022	50177	746529	0.75128128	0.829402506	0.201735917	8	66	Ucayali province	Potential native area	V	0.042794672	0	0.005853367	0.015299589	0.058953114	0.877099258	0.021152956
544	GBIF	PRESERVED_SPECIMEN	U	2517464034	SPECIES	Theobroma	cacao		Theobroma cacao L.	Sastre, C.H.L. & Sastre, F.	110	12/03/68	-1.463889	-48.4632381	2517464034	44207	12	3	1968	331693	0	8572	27035	185859	652409	0.410442507	0.658553213	0.55760358	223	61	Pará province	Potential early introduction	H	0.275134211	0	0.007110341	0.022425114	0.154167164	0.54116317	0.029535455
545	GBIF	PRESERVED_SPECIMEN	HUAZ	1135158800	SPECIES	Theobroma	cacao		Theobroma cacao L.	Diaz, J.; et al.	18	12/02/02	1.65	-75.606667	0	44225	12	2	2002	53112	0	7134	38315	208695	898313	0.645858117	0.691591322	0.200438716	8	59	Napo province	Potential native area	U	0.044055546	0	0.005917538	0.031781673	0.173109129	0.745136114	0.037699211
546	GBIF	PRESERVED_SPECIMEN	COAH	768760317	SPECIES	Theobroma	cacao		Theobroma cacao L.	Diaz, J.	51	12/02/02	1.65	-75.65	768760317	44216	12	2	2002	53112	0	7134	38315	208695	898313	0.645858117	0.691591322	0.200438716	8	59	Napo province	Potential native area	U	0.044055546	0	0.005917538	0.031781673	0.173109129	0.745136114	0.037699211
547	GBIF	PRESERVED_SPECIMEN	MEXU	1895556032	SPECIES	Theobroma	cacao		Theobroma cacao L.	Samuel Levy, T.	s.n.	12/02/94	16.741667	-91.091667	0	44222	12	2	1994	20011	0	9193	24986	91149	1060194	0.773754778	0.846685886	0.178996504	20	48	Mesoamerica	Unequivocal early introduction	T	0.016599297	0	0.007625673	0.020726102	0.07560888	0.879440049	0.028351775
548	GBIF	PRESERVED_SPECIMEN	MEXU	1893574250	SPECIES	Theobroma	cacao		Theobroma cacao L.	Samuel Levy, T. & Alejandro Duran, F.	s.n.	12/02/94	16.71465875	-91.1221275	0	44222	12	2	1994	20011	0	9193	24986	91149	1060194	0.773754778	0.846685886	0.178996504	20	48	Mesoamerica	Unequivocal early introduction	T	0.016599297	0	0.007625673	0.020726102	0.07560888	0.879440049	0.028351775
549	GBIF	PRESERVED_SPECIMEN	CHAP	1419224523	SPECIES	Theobroma	cacao		Theobroma cacao L.	S. Levy, T. & A. Duran, F.	s.n.	12/02/94	16.733333	-91.083333	0	44228	12	2	1994	20011	0	9193	24986	91149	1060194	0.773754778	0.846685886	0.178996504	20	48	Mesoamerica	Unequivocal early introduction	T	0.016599297	0	0.007625673	0.020726102	0.07560888	0.879440049	0.028351775
550	GBIF	PRESERVED_SPECIMEN	MBML	1123786221	SPECIES	Theobroma	cacao		Theobroma cacao L.	Fernandes, H.Q.B.	1736	12/12/85	-19.936111	-40.6	0	44252	12	12	1985	554157	0	6378	19775	122905	502273	0.362676233	0.410660863	0.397652974	216	74	South American Atlantic coast	Unequivocal late introduction	G	0.459695161	0	0.005290803	0.016404145	0.101954561	0.41665533	0.021694948
551	GBIF	PRESERVED_SPECIMEN	US	2284162226	SPECIES	Theobroma	cacao		Theobroma cacao L.	H.h.schmidt, M.M.A.C. & Kipo, A.	2148	12/11/96	7.1106	0.5994	1321416274	44224	12	11	1996	18656	0	19527	202603	782590	182208	0.431271203	0.418239832	0.152294022	193	55	Africa	Unequivocal late introduction	D	0.015474658	0	0.016197129	0.168053823	0.649137679	0.151136711	0.184250952
552	GBIF	PRESERVED_SPECIMEN	HUA	1123898159	SPECIES	Theobroma	cacao		Theobroma cacao L.	Albert, L.; et al.	2602	12/10/82	3.58529	-76.79085	1123898159	44263	12	10	1982	42281	0	9189	30115	116930	492551	0.633416899	0.712782443	0.22465369	9	58	Cauca province	Unequivocal early introduction	#N/A	0.061182289	0	0.013296849	0.043577603	0.169202363	0.712740896	0.056874452
553	GBIF	PRESERVED_SPECIMEN	MFS	1585209102	SPECIES	Theobroma	cacao		Theobroma cacao L.	Silva, G.C.	50	12/01/17	-3.198617	-52.212339	0	44222	12	1	2017	63721	0	1626	5757	176970	773917	0.688004111	0.791157126	0.288686112	226	62	Xingu-Tapajós province	Potential early introduction	I	0.062349864	0	0.001591012	0.005633122	0.173161995	0.757264007	0.007224134
554	GBIF	PRESERVED_SPECIMEN	HPL	1099308411	SPECIES	Theobroma	cacao		Theobroma cacao L.	Lorenzi, H.	3512	12/01/05	-22.78397332	-47.28479465	0	44238	12	1	2005	39948	0	22490	60833	207085	875235	0.658914942	0.726366639	0.220872871	219	76	South American Atlantic coast	Unequivocal late introduction	G	0.033135616	0	0.018654751	0.050459069	0.171770526	0.725980038	0.069113821
555	GBIF	PRESERVED_SPECIMEN	US	2397803437	SPECIES	Theobroma	cacao		Theobroma cacao L.	Kellerman, W.A.	6045	12/01/07	14.5245485	-91.685788	2397803437	44221	12	1	1907	62508	0	14304	80981	354946	548323	0.567759871	0.612281531	0.235850223	20	50	Mesoamerica	Unequivocal early introduction	T	0.058910789	0	0.013480833	0.076320705	0.334519566	0.516768106	0.089801538
556	GBIF	PRESERVED_SPECIMEN	MEL	2436273341	SPECIES	Theobroma	cacao		Theobroma cacao L.	Cochrane, A.C.	701	11/08/99	-37.8167	144.9667	0	44215	11	8	1999	69561	0	12436	238514	374165	385530	0.474213571	0.470159322	0.266131617	93	86	Oceania and Pacific islands	Unequivocal late introduction	F	0.06439605	0	0.011512619	0.22080418	0.346383005	0.356904146	0.232316799
557	GBIF	PRESERVED_SPECIMEN	US	1320517019	SPECIES	Theobroma	cacao		Theobroma cacao L.	Emmons, B.	111	11/06/68	7.4942086	134.5690225	1320517019	44270	11	6	1968	1136044	0	2224	4599	8787	20602	-0.06084773	-0.06849315	0.16072089	106	55	Oceania and Pacific islands	Unequivocal late introduction	F	0.969109137	0	0.001897197	0.003923204	0.007495803	0.017574659	0.005820401
558	GBIF	PRESERVED_SPECIMEN	L	2517118149	SPECIES	Theobroma	cacao		Theobroma cacao L.	Heilbron, T.J. & Der, G.P.	26	11/04/12	5.774833	-5.9744	2514941703	44208	11	4	2012	86170	0	17683	53257	372170	676291	0.553660261	0.622737348	0.195934893	197	56	Africa	Unequivocal late introduction	D	0.071476504	0	0.014667738	0.044175747	0.308708488	0.560971523	0.058843486
559	GBIF	PRESERVED_SPECIMEN	SLUI	1087721906	SPECIES	Theobroma	cacao		Theobroma cacao L.	Ribeira, M.	81	11/04/89	-4.55	-45.116667	0	44216	11	4	1989	17288	0	3806	12236	59430	387434	0.671319314	0.728885949	0.191111739	221	63	Pará province	Potential early introduction	H	0.036002116	0	0.007925963	0.025481368	0.123762479	0.806828074	0.033407331
560	GBIF	PRESERVED_SPECIMEN	L	2516283613	SPECIES	Theobroma	cacao		Theobroma cacao L.	Moore, J.W.	725	11/04/27	-16.8164132	-151.4552213	2515574562	44210	11	4	1927	1059324	0	1370	3112	5878	15991	-0.023259643	-0.036353145	0.119788752	55	72	Oceania and Pacific islands	Unequivocal late introduction	F	0.975728464	0	0.001261888	0.00286642	0.005414143	0.014729086	0.004128307
562	GBIF	PRESERVED_SPECIMEN	US	2284369341	SPECIES	Theobroma	cacao		Theobroma cacao L.	Mendoza, P.; et al.	111	11/03/92	-1.2172	-77.3856	2284369341	44223	11	3	1992	79920	0	10980	27340	80213	1006289	0.715861168	0.815963745	0.227841836	9	61	Napo province	Potential native area	U	0.066337855	0	0.009113985	0.022693656	0.066581061	0.835273444	0.03180764
563	GBIF	PRESERVED_SPECIMEN	HUAZ	1135158972	SPECIES	Theobroma	cacao		Theobroma cacao L.	C√°rdenas, D.; et al.	9781	11/12/98	-2.56	-70.21	768757215	44225	11	12	1998	46935	0	9214	27403	84863	944676	0.71836514	0.811965823	0.226984099	4	62	Imerí province	Potential early introduction	L	0.042166364	0	0.00827785	0.024618832	0.076240846	0.848696108	0.032896681
564	GBIF	PRESERVED_SPECIMEN	NY	1930458420	SPECIES	Theobroma	cacao		Theobroma cacao L.	Cervi, A.C.	4262	11/12/93	-19.01314165	-57.65422076	1930458420	44246	11	12	1993	70261	0	6803	32203	382112	714151	0.595231631	0.651402444	0.229203898	227	73	Rondônia province	Potential early introduction	K	0.058282249	0	0.005643161	0.026712732	0.316965982	0.592395876	0.032355893
565	GBIF	PRESERVED_SPECIMEN	UPCB	1086628539	SPECIES	Theobroma	cacao		Theobroma cacao L.	Cervi, A.C.	4262	11/12/93	-18.78861818	-57.53893904	0	44216	11	12	1993	41299	0	1272	7444	152660	1002890	0.730277026	0.806566119	0.245706568	227	73	Rondônia province	Potential early introduction	K	0.034256967	0	0.001055107	0.006174698	0.126629423	0.831883806	0.007229805
567	GBIF	PRESERVED_SPECIMEN	CESJ	1077268041	SPECIES	Theobroma	cacao		Theobroma cacao L.	Krieger, L.	s.n.	11/12/85	-21.54911321	-42.64444592	0	44216	11	12	1985	42679	0	11968	62925	276875	811146	0.6342573	0.694238842	0.217211299	217	75	South American Atlantic coast	Unequivocal late introduction	G	0.035400836	0	0.009927065	0.052194231	0.229658765	0.672819102	0.062121296
568	GBIF	PRESERVED_SPECIMEN	XAL	2629679562	SPECIES	Theobroma	cacao		Theobroma cacao L.	Solheim, S.L. & Benz, B.	s.n.	11/12/83	17.755556	-96.315555	0	44204	11	12	1983	23292	0	15531	151859	296260	718636	0.611784666	0.71372202	0.244877113	24	48	Mesoamerica	Unequivocal early introduction	T	0.019320193	0	0.012882617	0.125963646	0.245741047	0.596092497	0.138846263
569	GBIF	PRESERVED_SPECIMEN	XAL	2629528618	SPECIES	Theobroma	cacao		Theobroma cacao L.	S., E.E.R. & J. Arellano, M.	s.n.	11/11/89	20.675	-88.575	0	44204	11	11	1989	435	0	309	2681	60243	1141935	0.759882133	0.782736361	0.088506794	20	46	Mesoamerica	Unequivocal early introduction	T	0.000360815	0	0.000256303	0.002223783	0.049969186	0.947189912	0.002480087
570	GBIF	PRESERVED_SPECIMEN	COAH	768733645	SPECIES	Theobroma	cacao		Theobroma cacao L.	Andel, T.R.; et al.	460	11/11/89	-0.56	-72.22	768733645	44223	11	11	1989	4587	0	72	243	683	378187	0.851557101	0.867432952	0.130050374	6	60	Imerí province	Potential early introduction	L	0.011952409	0	0.000187611	0.000633188	0.001779703	0.985447088	0.0008208
571	GBIF	PRESERVED_SPECIMEN	ECO-CH-H	1894682427	SPECIES	Theobroma	cacao		Theobroma cacao L.	Orellana, R. & Escalante, S.	s.n.	11/11/89	20.658333	-88.534722	0	44251	11	11	1989	435	0	309	2681	60243	1141935	0.759882133	0.782736361	0.088506794	20	46	Mesoamerica	Unequivocal early introduction	T	0.000360815	0	0.000256303	0.002223783	0.049969186	0.947189912	0.002480087
572	GBIF	PRESERVED_SPECIMEN	CICY	1421370570	SPECIES	Theobroma	cacao		Theobroma cacao L.	Escalante, S. & Arellano, J.	s.n.	11/11/89	20.655556	-88.538889	0	44228	11	11	1989	435	0	309	2681	60243	1141935	0.759882133	0.782736361	0.088506794	20	46	Mesoamerica	Unequivocal early introduction	T	0.000360815	0	0.000256303	0.002223783	0.049969186	0.947189912	0.002480087
573	GBIF	PRESERVED_SPECIMEN	UADY	1419061552	SPECIES	Theobroma	cacao		Theobroma cacao L.	Escalante, S. & Arellano, J.	s.n.	11/11/89	20.658333	-88.558333	0	44266	11	11	1989	435	0	309	2681	60243	1141935	0.759882133	0.782736361	0.088506794	20	46	Mesoamerica	Unequivocal early introduction	T	0.000360815	0	0.000256303	0.002223783	0.049969186	0.947189912	0.002480087
574	GBIF	PRESERVED_SPECIMEN	KU	2310918046	SPECIES	Theobroma	cacao		Theobroma cacao L.	Alfredo-Vazquez	s.n.	11/10/10	14.52	-92.21	0	44217	11	10	2010	507936	0	2991	16663	137346	540652	0.298245816	0.501045316	0.513379714	21	50	Mesoamerica	Unequivocal early introduction	T	0.421318062	0	0.002480947	0.013821471	0.113924492	0.448455028	0.016302418
575	GBIF	PRESERVED_SPECIMEN	BANGEV	1417923576	SPECIES	Theobroma	cacao		Theobroma cacao L.	Disponible, N.O.	s.n.	11/10/84	15.699722	-92.199722	0	44218	11	10	1984	117529	0	9279	91416	437939	549395	0.526802832	0.562883437	0.278487247	21	49	Mesoamerica	Unequivocal early introduction	T	0.097489295	0	0.007696851	0.075828786	0.363266637	0.455718431	0.083525637
576	GBIF	PRESERVED_SPECIMEN	BANGEV	1417914871	SPECIES	Theobroma	cacao		Theobroma cacao L.	Disponible, N.O.	s.n.	11/10/83	15.699722	-92.195833	0	44218	11	10	1983	117529	0	9279	91416	437939	549395	0.526802832	0.562883437	0.278487247	21	49	Mesoamerica	Unequivocal early introduction	T	0.097489295	0	0.007696851	0.075828786	0.363266637	0.455718431	0.083525637
577	GBIF	PRESERVED_SPECIMEN	US	2284239788	SPECIES	Theobroma	cacao		Theobroma cacao L.	Roldan, F.J. & R. Fonnegra, G.	2261	11/01/95	6.25	-74.57	1322239000	44223	11	1	1995	27137	0	4147	12750	192603	968932	0.707004123	0.750889659	0.178776067	8	56	Magdalena province	Unequivocal early introduction	R	0.022509703	0	0.003439869	0.010575919	0.159761075	0.803713433	0.014015788
578	GBIF	PRESERVED_SPECIMEN	XAL	2629475183	SPECIES	Theobroma	cacao		Theobroma cacao L.	Castillo-Campos, G.; et al.	s.n.	11/01/92	19.331667	-96.761667	0	44204	11	1	1992	363265	0	22409	84132	270250	465484	0.385664009	0.45440957	0.35738115	25	47	Mesoamerica	Unequivocal early introduction	T	0.301329695	0	0.01858835	0.069787813	0.224173399	0.386120743	0.088376163
580	GBIF	PRESERVED_SPECIMEN	US	2397758233	SPECIES	Theobroma	cacao		Theobroma cacao L.	Standley, P.C.	30479	11/01/24	8.4590906	-80.2850929	2397758233	44221	11	1	1924	132095	0	3194	11342	50887	115698	0.309452357	0.373892695	0.408213873	12	54	Pacific dominion	Unequivocal early introduction	Q	0.421737715	0	0.010197436	0.036211432	0.162466158	0.36938726	0.046408868
581	GBIF	PRESERVED_SPECIMEN	CR	46082937	SUBSPECIES	Theobroma	cacao	Theobroma cacao. subsp. cacao	Theobroma cacao subsp. cacao	Burger, W.	s.n.	10/09/78	9.63	-82.83	0	44216	10	9	1978	157849	0	12782	39766	160054	835093	0.642435522	0.812109888	0.304970513	14	53	Pacific dominion	Unequivocal early introduction	Q	0.130935909	0	0.010602682	0.032985938	0.132764959	0.692710511	0.043588621
584	GBIF	PRESERVED_SPECIMEN	WAG	2626723345	SPECIES	Theobroma	cacao		Theobroma cacao L.	Koning, J.	s.n	10/07/73	5.3932312	-4.0524856	2626723345	44204	10	7	1973	9244	0	4413	13248	87518	1091179	0.681829631	0.708200425	0.105593032	196	56	Africa	Unequivocal late introduction	D	0.007667539	0	0.003660412	0.010988701	0.072592779	0.905090569	0.014649113
585	GBIF	PRESERVED_SPECIMEN	HUESB	2236798417	SPECIES	Theobroma	cacao		Theobroma cacao L.	Carmo, V.S.; et al.	338	10/06/14	-14.736111	-39.364167	0	44242	10	6	2014	140721	0	6661	25484	176828	855630	0.644052284	0.763287425	0.315930606	216	70	South American Atlantic coast	Unequivocal late introduction	G	0.116749521	0	0.005526315	0.021142863	0.146705782	0.709875519	0.026669178
586	GBIF	PRESERVED_SPECIMEN	RB	2029276586	SPECIES	Theobroma	cacao		Theobroma cacao L.	Carmo, V.S.; et al.	341	10/06/14	-14.716667	-39.3825	2029276586	44244	10	6	2014	140721	0	6661	25484	176828	855630	0.644052284	0.763287425	0.315930606	216	70	South American Atlantic coast	Unequivocal late introduction	G	0.116749521	0	0.005526315	0.021142863	0.146705782	0.709875519	0.026669178
587	GBIF	PRESERVED_SPECIMEN	UESC	1094177462	SPECIES	Theobroma	cacao		Theobroma cacao L.	Carmo, V.S.	339	10/06/14	-14.715833	-39.368333	0	43845	10	6	2014	140721	0	6661	25484	176828	855630	0.644052284	0.763287425	0.315930606	216	70	South American Atlantic coast	Unequivocal late introduction	G	0.116749521	0	0.005526315	0.021142863	0.146705782	0.709875519	0.026669178
588	GBIF	PRESERVED_SPECIMEN	WAG	2626693352	SPECIES	Theobroma	cacao		Theobroma cacao L.	Versteegh, C. & Outer, R.W.	256	10/06/69	5.25	-6.066667	2626693352	44204	10	6	1969	670890	0	6371	19499	68851	365671	0.239003559	-0.047365265	0.384054923	197	56	Africa	Unequivocal late introduction	D	0.593035158	0	0.005631664	0.017236198	0.060861041	0.323235939	0.022867861
589	GBIF	PRESERVED_SPECIMEN	U	2517201221	SPECIES	Theobroma	cacao		Theobroma cacao L.	Krukoff, B.A.	4736	10/06/33	-7.5	-70.25	1930306948	44208	10	6	1933	18600	0	6256	22280	80916	1077543	0.793040798	0.861529529	0.174377284	4	65	Rondônia province	Potential early introduction	K	0.015428067	0	0.005189139	0.018480501	0.067117067	0.893785226	0.02366964
590	GBIF	PRESERVED_SPECIMEN	K	1421197195	SPECIES	Theobroma	cacao		Theobroma cacao L.	Krukoff, B.A.	4736	10/06/33	-7.4894529	-70.0602439	1930306948	44208	10	6	1933	18600	0	6256	22280	80916	1077543	0.793040798	0.861529529	0.174377284	4	65	Rondônia province	Potential early introduction	K	0.015428067	0	0.005189139	0.018480501	0.067117067	0.893785226	0.02366964
591	GBIF	PRESERVED_SPECIMEN	CEPEC	1944966894	SPECIES	Theobroma	cacao		Theobroma cacao L.	Santos, T.S.	673	10/04/70	-14.51618997	-39.22655381	0	44245	10	4	1970	142765	0	17289	46549	142869	855438	0.613129469	0.755774111	0.331585295	215	70	South American Atlantic coast	Unequivocal late introduction	G	0.118486028	0	0.01434879	0.038632761	0.118572342	0.70996008	0.05298155
592	GBIF	PRESERVED_SPECIMEN	CONN	1212007477	SPECIES	Theobroma	cacao		Theobroma cacao L.	Abbott, J.R.	8220	10/03/96	29.64416	-82.34666	0	44228	10	3	1996	153368	0	11320	35436	214655	276715	0.360577286	0.522959739	0.478768668	17	39	North America	Unequivocal late introduction	B	0.221792235	0	0.016370352	0.051245564	0.310422072	0.400169777	0.067615916
593	GBIF	PRESERVED_SPECIMEN	US	1320837174	SPECIES	Theobroma	cacao		Theobroma cacao L.	Gentry, A.H.; et al.	9831	10/02/74	-0.283333	-75.866667	1320837174	44239	10	2	1974	14693	0	2767	12585	51748	1123797	0.801691147	0.845039845	0.14658904	8	60	Napo province	Potential native area	U	0.012187394	0	0.002295142	0.010438872	0.042923382	0.93215521	0.012734014
596	GBIF	PRESERVED_SPECIMEN	US	2284229336	SPECIES	Theobroma	cacao	Theobroma cacao Criollo rojizo	Theobroma cacao L.	Cuatrecasas, J. & Cuevas, C.	26564	10/11/61	12.6234721	-87.1273253	1321311406	44223	10	11	1961	987794	0	4129	14601	30423	73423	-0.025269669	-0.065868266	0.259986403	17	51	Mesoamerica	Unequivocal early introduction	T	0.889607969	0	0.00371858	0.013149671	0.027398975	0.066124805	0.016868251
598	GBIF	PRESERVED_SPECIMEN	CIB	1418339943	SPECIES	Theobroma	cacao		Theobroma cacao L.	M. Vazquez, T.	s.n.	10/01/87	15.391667	-92.591667	0	44228	10	1	1987	117529	0	9279	91416	437939	549395	0.526802832	0.562883437	0.278487247	21	49	Mesoamerica	Unequivocal early introduction	T	0.097489295	0	0.007696851	0.075828786	0.363266637	0.455718431	0.083525637
599	GBIF	PRESERVED_SPECIMEN	US	2397812364	SPECIES	Theobroma	cacao		Theobroma cacao L.	Standley, P.C. & Valerio, J.	44954	10/01/26	10.4563619	-84.9713512	2397812364	44215	10	1	1926	102063	0	6032	31465	160801	297773	0.511746314	0.597226948	0.331877126	16	53	Puntarenas-Chiriquí province	Unequivocal early introduction	S	0.170635677	0	0.010084697	0.052605269	0.268837752	0.497836605	0.062689966
600	GBIF	PRESERVED_SPECIMEN	HUA	1123890685	SPECIES	Theobroma	cacao		Theobroma cacao L.	David, H.; et al.	1184	01/09/05	5.565944	-74.927444	1123890685	44225	1	9	2005	34680	0	5524	15027	83911	1066426	0.737615009	0.791557491	0.180125394	9	56	Magdalena province	Unequivocal early introduction	R	0.028766523	0	0.004582073	0.012464664	0.069602876	0.884583864	0.017046736
601	GBIF	PRESERVED_SPECIMEN	US	1321361970	SPECIES	Theobroma	cacao		Theobroma cacao L.	Aymard, G.A.; et al.	11469	01/08/96	-14.75	-66.03	1321361970	44239	1	8	1996	36917	0	10642	28160	104815	1023162	0.726795244	0.790184915	0.201984529	233	70	Rondônia province	Potential early introduction	K	0.030669704	0	0.008841103	0.023394611	0.087077634	0.850016948	0.032235714
602	GBIF	PRESERVED_SPECIMEN	U	2517174043	SPECIES	Theobroma	cacao		Theobroma cacao L.	Pennington, R.T.; et al.	70	01/08/88	-11.166667	-69.116667	2517174043	44208	1	8	1988	1376	0	241	829	7084	826332	0.870223329	0.888494313	0.072959655	2	68	Rondônia province	Potential early introduction	K	0.001646205	0	0.000288325	0.000991791	0.008475083	0.988598596	0.001280116
603	GBIF	PRESERVED_SPECIMEN	MO	1258381199	SPECIES	Theobroma	cacao		Theobroma cacao L.	Pennington, R.T.; et al.	70	01/08/88	-11.16666	-67.11666	2517174043	44169	1	8	1988	7296	0	166	952	12928	397961	0.833348979	0.878002286	0.155097375	1	68	Rondônia province	Potential early introduction	K	0.017400305	0	0.000395895	0.002270435	0.030832119	0.949101247	0.00266633
605	GBIF	PRESERVED_SPECIMEN	NY	1929108101	SPECIES	Theobroma	cacao		Theobroma cacao L.	Fredholm, A.J.	3117	1/7/1897	18.171276	-76.447632	1929108101	44251	1	7	1897	1054340	0	3709	9284	19916	117630	-0.096455025	-0.176470593	0.342841237	11	47	Antilles	Unequivocal late introduction	A	0.875058823	0	0.003078317	0.007705338	0.016529461	0.097628061	0.010783655
606	GBIF	PRESERVED_SPECIMEN	COAH	768733642	SPECIES	Theobroma	cacao		Theobroma cacao L.	Urrego, L.E.	1823	01/06/90	-0.86	-71.81	768733642	44223	1	6	1990	9646	0	150	852	5264	1056454	0.820015111	0.835764468	0.126346866	5	61	Imerí province	Potential early introduction	L	0.008995063	0	0.000139878	0.000794505	0.004908772	0.985161782	0.000934382
607	GBIF	PRESERVED_SPECIMEN	HUA	1123916378	SPECIES	Theobroma	cacao		Theobroma cacao L.	Giraldo, D.	1720	01/05/93	6.033333	-75.133333	0	44225	1	5	1993	12208	0	3250	10309	124422	948954	0.730005157	0.774602294	0.14826789	9	56	Magdalena province	Unequivocal early introduction	R	0.011106835	0	0.002956849	0.009379125	0.113199101	0.863358089	0.012335974
608	GBIF	PRESERVED_SPECIMEN	COAH	768733330	SPECIES	Theobroma	cacao		Theobroma cacao L.	Urrego, L.E.; et al.	448	01/05/89	-0.81	-71.82	768733330	44223	1	5	1989	9646	0	150	852	5264	1056454	0.820015111	0.835764468	0.126346866	6	60	Imerí province	Potential early introduction	L	0.008995063	0	0.000139878	0.000794505	0.004908772	0.985161782	0.000934382
609	GBIF	PRESERVED_SPECIMEN	INM	381848431	SPECIES	Theobroma	cacao		Theobroma cacao L.	s.c.	s.n.	01/05/62	34.64897	138.86868	0	44271	1	5	1962	985948	0	3475	12412	50106	153380	-0.015856699	-0.118811883	0.343488474	107	36	Asia	Unequivocal late introduction	E	0.817996202	0	0.002883049	0.010297672	0.041570669	0.127252408	0.013180721
610	GBIF	PRESERVED_SPECIMEN	US	1322896352	SPECIES	Theobroma	cacao		Theobroma cacao L.	Wen, J.	12890	01/04/16	38.91213	-76.9657782	1322896352	44266	1	4	2016	206412	0	19547	129943	789707	57634	0.292874693	0.398840219	0.308849653	15	33	North America	Unequivocal late introduction	B	0.171546396	0	0.016245264	0.10799398	0.656315474	0.047898887	0.124239243
611	GBIF	PRESERVED_SPECIMEN	US	1317910975	SPECIES	Theobroma	cacao		Theobroma cacao L.	Reyes, D. & Carrillo, L.	445	01/04/04	-0.3739	-76.5522	1317910975	44271	1	4	2004	21255	0	1892	6179	27192	1149029	0.816607505	0.854238331	0.146636219	9	60	Napo province	Potential native area	U	0.017631001	0	0.001569412	0.005125474	0.022555736	0.953118377	0.006694886
612	GBIF	PRESERVED_SPECIMEN	L	2517260818	SPECIES	Theobroma	cacao		Theobroma cacao L.	Brandbyge, J. & Asanza, E.C.	30390	01/04/80	0.116667	-76.916667	2517260818	44208	1	4	1980	4856	0	694	2367	18107	360819	0.788714767	0.839711189	0.13908306	9	60	Napo province	Potential native area	U	0.012552896	0	0.001794009	0.006118761	0.046807103	0.93272723	0.007912771
613	GBIF	PRESERVED_SPECIMEN	MO	1259971243	SPECIES	Theobroma	cacao		Theobroma cacao L.	Brandbyge, J. & Asanza, E.C.	30390	01/04/80	0.11666	-76.91666	2517260818	44169	1	4	1980	4856	0	694	2367	18107	360819	0.788714767	0.839711189	0.13908306	9	60	Napo province	Potential native area	U	0.012552896	0	0.001794009	0.006118761	0.046807103	0.93272723	0.007912771
614	GBIF	PRESERVED_SPECIMEN	AAU	47855476	SPECIES	Theobroma	cacao		Theobroma cacao L.	Brandbyge, J.	s.n.	01/04/80	0.116	-76.916	0	44260	1	4	1980	4856	0	694	2367	18107	360819	0.788714767	0.839711189	0.13908306	9	60	Napo province	Potential native area	U	0.012552896	0	0.001794009	0.006118761	0.046807103	0.93272723	0.007912771
616	GBIF	PRESERVED_SPECIMEN	XAL	2629661701	SPECIES	Theobroma	cacao		Theobroma cacao L.	A. Valle, D.	s.n.	01/03/97	16.900833	-90.973611	0	44204	1	3	1997	10313	0	2743	8239	39231	391366	0.735226204	0.808071285	0.175133834	20	48	Mesoamerica	Unequivocal early introduction	T	0.022821825	0	0.006070034	0.018232232	0.086814991	0.866060917	0.024302267
617	GBIF	PRESERVED_SPECIMEN	COAH	1324643937	SPECIES	Theobroma	cacao		Theobroma cacao L.	Urrego, L.E.	376	01/03/89	-0.82	-71.8	1324643937	44223	1	3	1989	9646	0	150	852	5264	1056454	0.820015111	0.835764468	0.126346866	5	61	Imerí province	Potential early introduction	L	0.008995063	0	0.000139878	0.000794505	0.004908772	0.985161782	0.000934382
618	GBIF	PRESERVED_SPECIMEN	EFC	2427795464	SPECIES	Theobroma	cacao		Theobroma cacao L.	Kuniyoshi, Y.S.	4777	01/03/84	-25.5105	-48.8082	0	44215	1	3	1984	677088	0	8412	23392	52176	444321	0.226524391	-0.037383176	0.512698829	220	78	South American Atlantic coast	Unequivocal late introduction	G	0.561717421	0	0.00697866	0.019406183	0.043285612	0.368612124	0.026384843
620	GBIF	PRESERVED_SPECIMEN	BANGEV	1417927721	SPECIES	Theobroma	cacao		Theobroma cacao L.	Disponible, N.O.	s.n.	01/11/96	15.699722	-92.188889	0	44218	1	11	1996	117529	0	9279	91416	437939	549395	0.526802832	0.562883437	0.278487247	21	49	Mesoamerica	Unequivocal early introduction	T	0.097489295	0	0.007696851	0.075828786	0.363266637	0.455718431	0.083525637
621	GBIF	PRESERVED_SPECIMEN	WAG	2626731356	SPECIES	Theobroma	cacao		Theobroma cacao L.	Buchtien, O.	s.n	01/11/07	-15.652967	-67.917817	2516281611	44204	1	11	1907	28620	0	3452	12066	18550	198640	0.679082264	0.833965123	0.285866742	1	71	Rondônia province	Potential early introduction	K	0.109517541	0	0.013209453	0.046171861	0.070983592	0.760117553	0.059381314
622	GBIF	PRESERVED_SPECIMEN	ESA	2459929333	SPECIES	Theobroma	cacao		Theobroma cacao L.	Equipe de Fitossociologia do CNEC	A-68.6	01/01/97	-11.73262181	-56.74618211	2459929333	44263	1	1	1997	4037	0	5076	13871	91662	1061067	0.773720823	0.826615989	0.13589643	227	68	Xingu-Tapajós province	Potential early introduction	I	0.003433661	0	0.00431738	0.011797947	0.077962904	0.902488107	0.016115327
623	GBIF	PRESERVED_SPECIMEN	NY	1929830542	SPECIES	Theobroma	cacao		Theobroma cacao L.	Alexiades, M.N.	1060	01/01/91	-12.43	-69.25	0	44249	1	1	1991	25314	0	4804	14252	42788	996419	0.82311225	0.885642469	0.188628061	2	69	Rondônia province	Potential early introduction	K	0.023361515	0	0.004433464	0.013152734	0.039487734	0.919564553	0.017586198
624	GBIF	PRESERVED_SPECIMEN	XAL	1894895651	SPECIES	Theobroma	cacao		Theobroma cacao L.	Jorge Cadena, I.	s.n.	01/01/88	14.974976	-92.155904	0	44221	1	1	1988	507936	0	2991	16663	137346	540652	0.298245816	0.501045316	0.513379714	21	50	Mesoamerica	Unequivocal early introduction	T	0.421318062	0	0.002480947	0.013821471	0.113924492	0.448455028	0.016302418
625	GBIF	PRESERVED_SPECIMEN	U	2517500068	SPECIES	Theobroma	cacao		Theobroma cacao L.	Elburg, R.	8818	01/01/61	2.8499618	-55.8913646	2517500068	44207	1	1	1961	1898	0	1529	7339	38585	1156249	0.825261389	0.852345109	0.097698658	229	58	Guianan Lowlands province	Potential early introduction	N	0.00157432	0	0.001268248	0.006087425	0.032004811	0.959065196	0.007355674
626	GBIF	PRESERVED_SPECIMEN	FAUC	1576175287	SPECIES	Theobroma	cacao		Theobroma cacao L.	Duque-Jaramillo, J.M.	4366	01/01/47	3.52026	-76.308652	0	44249	1	1	1947	42281	0	9189	30115	116930	492551	0.633416899	0.712782443	0.22465369	9	58	Cauca province	Unequivocal early introduction	#N/A	0.061182289	0	0.013296849	0.043577603	0.169202363	0.712740896	0.056874452
627	GBIF	PRESERVED_SPECIMEN	FAUC	1576175275	SPECIES	Theobroma	cacao		Theobroma cacao L.	Duque-Jaramillo, J.M.	4366	01/01/45	4.650837	-74.466128	0	44249	1	1	1945	68803	0	13197	67864	372422	683258	0.580985662	0.638953388	0.218157803	8	57	Magdalena province	Unequivocal early introduction	R	0.05707216	0	0.010946925	0.056293258	0.308924436	0.566763221	0.067240184
628	GBIF	PRESERVED_SPECIMEN	L	2513173573	SPECIES	Theobroma	cacao	Theobroma cacao. Var. forastero	Theobroma cacao L.	Delft, T.H.	178	01/01/35	-6.5897	106.7913	0	44214	1	1	1935	356039	0	14930	52166	226985	555452	0.399941821	0.561941415	0.378201949	122	65	Asia	Unequivocal late introduction	E	0.295327861	0	0.012384163	0.043270746	0.18827992	0.46073731	0.055654909
629	GBIF	PRESERVED_SPECIMEN	L	2516368793	SPECIES	Theobroma	cacao		Theobroma cacao L.	Vriese, W.H.	s.n.	1/1/1857	-3.4	126.666667	2516368793	44209	1	1	1857	603982	0	7065	19564	64076	510800	0.295764329	0.133303612	0.477308674	110	62	Asia	Unequivocal late introduction	E	0.501027386	0	0.005860702	0.016229126	0.053153622	0.423729165	0.022089828
630	GBIF	PRESERVED_SPECIMEN	FMB	1707519620	SPECIES	Theobroma	cacao		Theobroma cacao L.	Zuluaga, S. & Continental, E.C.	1677	/9/1988	-1.554395112	-71.49182385	1707519620	44260	1	9	1988	17363	0	3731	13392	43236	1123316	0.786618721	0.829936326	0.154646176	5	61	Imerí province	Potential early introduction	L	0.014456662	0	0.00310648	0.011150355	0.035998861	0.935287643	0.014256835
631	GBIF	PRESERVED_SPECIMEN	F	1228590181	SPECIES	Theobroma	cacao		Theobroma cacao L.	Luna, L.E.	210	/8/1984	-3.75	-73.18333333	1228590181	44252	1	8	1984	9600	0	175	566	2902	493384	0.82509968	0.84833771	0.130013398	6	63	Napo province	Potential native area	U	0.018948852	0	0.000345422	0.001117193	0.00572808	0.973860454	0.001462615
632	GBIF	PRESERVED_SPECIMEN	U	2517435006	SPECIES	Theobroma	cacao		Theobroma cacao L.	Luna, L.E.	868	/8/1982	-3.75	-79.183333	1095590694	44207	1	8	1982	73186	0	23114	201371	530659	377194	0.467535324	0.454460308	0.221399797	10	63	Cauca province	Unequivocal early introduction	#N/A	0.06070887	0	0.019173405	0.167040225	0.440189494	0.312888006	0.18621363
633	GBIF	PRESERVED_SPECIMEN	CAS	1993795242	SPECIES	Theobroma	cacao		Theobroma cacao L.	Webster, G.L.; et al.	17854	/8/1972	15.516667	-92.4	0	44222	1	8	1972	117529	0	9279	91416	437939	549395	0.526802832	0.562883437	0.278487247	21	49	Mesoamerica	Unequivocal early introduction	T	0.097489295	0	0.007696851	0.075828786	0.363266637	0.455718431	0.083525637
634	GBIF	PRESERVED_SPECIMEN	CONN	1212007504	SPECIES	Theobroma	cacao		Theobroma cacao L.	Pfeifer, H.W.	2100	/8/1960	15.7	-87.46666	0	44228	1	8	1960	550550	0	1059	3852	36130	613851	0.351002895	0.62833333	0.500372194	18	49	Mesoamerica	Unequivocal early introduction	T	0.456720439	0	0.000878516	0.003195508	0.029972408	0.509233128	0.004074024
635	GBIF	PRESERVED_SPECIMEN	NY	1928797332	SPECIES	Theobroma	cacao		Theobroma cacao L.	Clement, B.	7931	/8/1927	20.016407	-76.064722	1928797332	44251	1	8	1927	213326	0	9082	57737	364611	559558	0.502544031	0.570226938	0.329697295	11	46	Antilles	Unequivocal late introduction	A	0.177134867	0	0.007541223	0.047941816	0.302754099	0.464627996	0.055483038
636	GBIF	PRESERVED_SPECIMEN	US	1322133890	SPECIES	Theobroma	cacao		Theobroma cacao L.	White, O.E.	953	/8/1921	-14.22965	-63.534271	1322133890	44235	1	8	1921	45577	0	9538	31914	168262	950243	0.718363508	0.816578031	0.230036591	231	70	Rondônia province	Potential early introduction	K	0.037806482	0	0.007911847	0.026472916	0.139574662	0.788234094	0.034384762
637	GBIF	PRESERVED_SPECIMEN	VT	2573001769	SPECIES	Theobroma	cacao		Theobroma cacao L.	Graham, E.H.	500	/8/1917	10.7333333	-61.5333333	1930358759	44263	1	8	1917	811040	0	11191	29923	86483	266780	0.116356153	-0.097701147	0.39572338	233	53	North America	Unequivocal late introduction	B	0.672829403	0	0.009283924	0.024823775	0.071745296	0.221317602	0.034107699
638	GBIF	PRESERVED_SPECIMEN	INPA	1042691526	SPECIES	Theobroma	cacao		Theobroma cacao L.	Cassino, M.F.	96	/7/2010	-3.291577018	-60.95829918	1042691526	44260	1	7	2010	214709	0	2748	8869	49726	929090	0.626502786	0.840341628	0.404881545	231	62	Imerí province	Potential early introduction	L	0.178160748	0	0.002280229	0.007359299	0.041261528	0.770938196	0.009639528
639	GBIF	PRESERVED_SPECIMEN	NY	1929107102	SPECIES	Theobroma	cacao		Theobroma cacao L.	Liogier, A.H.	30631	/6/1980	18.3895764	-66.0561116	1929107102	44251	1	6	1980	928877	0	6242	17089	41812	174675	0.053365813	-0.071038254	0.354360984	4	47	Antilles	Unequivocal late introduction	A	0.794798472	0	0.005341	0.014622292	0.035776657	0.149461579	0.019963292
640	GBIF	PRESERVED_SPECIMEN	US	1318898026	SPECIES	Theobroma	cacao		Theobroma cacao L.	Williams, L.	148	/5/1929	-7.278527873	-77.16978522	1228354794	44258	1	5	1929	22763	0	4419	11273	79970	1087168	0.805681018	0.865106702	0.165026641	8	65	South American Atlantic coast	Unequivocal late introduction	G	0.018881165	0	0.003665416	0.009350585	0.066332502	0.901770332	0.013016001
641	GBIF	PRESERVED_SPECIMEN	FMB	1707586050	SPECIES	Theobroma	cacao		Theobroma cacao L.	Lopez-Rivero, A.	263	/3/2006	8.350422773	-75.79954894	1707586050	44259	1	3	2006	41033	0	4574	26168	625172	383621	0.525195817	0.545483768	0.198250767	9	54	Magdalena province	Unequivocal early introduction	R	0.037973547	0	0.004232959	0.024216893	0.578558684	0.355017917	0.028449852
642	GBIF	PRESERVED_SPECIMEN	F	1228275139	SPECIES	Theobroma	cacao		Theobroma cacao L.	Williams, L.	8457	/3/1937	19.173773	-96.1342241	694272908	44258	1	3	1937	749221	0	10746	18768	34101	33204	-0.137744228	-0.186046511	0.273737906	24	47	Mesoamerica	Unequivocal early introduction	T	0.885562148	0	0.012701527	0.022183348	0.040306605	0.039246371	0.034884875
643	GBIF	PRESERVED_SPECIMEN	US	1319245263	SPECIES	Theobroma	cacao		Theobroma cacao L.	Carrillo, L. & Reyes, D.	353	/2/2004	-0.3672	-76.5522	1319245263	44270	1	2	2004	21255	0	1892	6179	27192	1149029	0.816607505	0.854238331	0.146636219	9	60	Napo province	Potential native area	U	0.017631001	0	0.001569412	0.005125474	0.022555736	0.953118377	0.006694886
645	GBIF	PRESERVED_SPECIMEN	US	1322830922	SPECIES	Theobroma	cacao		Theobroma cacao L.	Klug, G.	2938	/2/1933	-5.8283383	-76.5632726	1322830922	44228	1	2	1933	68537	0	8522	22421	69483	1036617	0.748682239	0.847305417	0.231618633	8	64	Ucayali province	Potential native area	V	0.056849815	0	0.007068797	0.018597687	0.0576345	0.859849201	0.025666484
646	GBIF	PRESERVED_SPECIMEN	US	1319127534	SPECIES	Theobroma	cacao		Theobroma cacao L.	Calder√≥n, S.	107	/2/1922	13.7086	-89.2031	1319127534	44270	1	2	1922	57634	0	7240	40928	422042	550839	0.576133479	0.60650301	0.23548452	19	50	Mesoamerica	Unequivocal early introduction	T	0.05342997	0	0.006711888	0.037942565	0.391256745	0.510658831	0.044654454
647	GBIF	PRESERVED_SPECIMEN	US	1322031939	SPECIES	Theobroma	cacao		Theobroma cacao L.	Klug, G.	926	/2-3/1930	-3.85	-73.22	1322031939	44237	1	2	1930	64029	0	8404	27264	104842	1001049	0.705524528	0.806079984	0.23019889	6	63	Napo province	Potential native area	U	0.053110184	0	0.006970872	0.022614691	0.086963374	0.830340879	0.029585563
648	GBIF	PRESERVED_SPECIMEN	MPU	1837361898	SPECIES	Theobroma	cacao		Theobroma cacao L.	Raposo, H.M.	11	/12/2003	-3.3433518	-60.6436354	0	44263	1	12	2003	214709	0	2748	8869	49726	929090	0.626502786	0.840341628	0.404881545	231	62	Imerí province	Potential early introduction	L	0.178160748	0	0.002280229	0.007359299	0.041261528	0.770938196	0.009639528
649	GBIF	PRESERVED_SPECIMEN	INPA	1042540591	SPECIES	Theobroma	cacao		Theobroma cacao L.	Duque-Jaramillo, J.M.	2480	/12/1945	-4.203165	-69.935907	1042540591	44266	1	12	1945	52290	0	8608	29641	105817	608931	0.689182291	0.8391155	0.292874337	4	63	Imerí province	Potential early introduction	L	0.064933372	0	0.010689357	0.036807995	0.131402841	0.756166435	0.047497352
650	GBIF	PRESERVED_SPECIMEN	NY	1929784863	SPECIES	Theobroma	cacao		Theobroma cacao L.	Cid-Ferreira, C.A.; et al.	9928	/1/1989	-4.499869	-71.787141	1929312204	44244	1	1	1989	25857	0	6399	32197	146859	994271	0.754099925	0.856989622	0.215523359	5	63	Madeira province	Potential early introduction	J	0.021447715	0	0.005307805	0.026706581	0.121815752	0.824722147	0.032014386
651	GBIF	PRESERVED_SPECIMEN	XAL	2629569908	SPECIES	Theobroma	cacao		Theobroma cacao L.	Converse, O.	s.n.	/1/1946	19.535	-96.825	0	44204	1	1	1946	363265	0	22409	84132	270250	465484	0.385664009	0.45440957	0.35738115	25	46	Mesoamerica	Unequivocal early introduction	T	0.301329695	0	0.01858835	0.069787813	0.224173399	0.386120743	0.088376163
652	GBIF	PRESERVED_SPECIMEN	US	2397800246	SPECIES	Theobroma	cacao		Theobroma cacao L.	Mell, C.D.	29	/1/1927	16.9089318	-94.6838743	2397800246	44221	1	1	1927	76242	0	3350	36115	261554	828326	0.628236303	0.756166995	0.357210292	23	48	Mesoamerica	Unequivocal early introduction	T	0.063240562	0	0.002778729	0.029956362	0.216951576	0.68707277	0.032735091
653	GBIF	PRESERVED_SPECIMEN	INPA	1042620503	SPECIES	Theobroma	cacao		Theobroma cacao L.		242	//2003	-2.8	-65.13	0	44260	1	1	2003	77384	0	3639	15983	134173	817270	0.699316115	0.844185174	0.290611962	1	62	Imerí province	Potential early introduction	L	0.073808073	0	0.003470841	0.015244423	0.127972844	0.779503819	0.018715264
654	GBIF	PRESERVED_SPECIMEN	ESA	2459922664	SPECIES	Theobroma	cacao		Theobroma cacao L.	Watanabe, F.	s.n.	//1991	-21.7963912	-51.1829113	2459922664	44242	1	1	1991	22581	0	10285	24870	316342	830880	0.645410536	0.673308909	0.18720429	222	75	South American Atlantic coast	Unequivocal late introduction	G	0.018740072	0	0.008535567	0.020639724	0.262533632	0.689551005	0.029175291
655	GBIF	PRESERVED_SPECIMEN	ESA	2459927377	SPECIES	Theobroma	cacao		Theobroma cacao L.	Romero, F.P.	s.n.	//1990	-17.8145819	-63.1560853	2459927377	44239	1	1	1990	7008	0	2608	15002	99442	344823	0.666387264	0.697735667	0.176566043	230	72	Rondônia province	Potential early introduction	K	0.014946159	0	0.005562155	0.031995189	0.212082758	0.735413739	0.037557344
656	GBIF	PRESERVED_SPECIMEN	F	1228374396	SPECIES	Theobroma	cacao		Theobroma cacao L.	Williams, L.	15869	//1942	3.1476392	-65.8605236	1228374396	44258	1	1	1942	13357	0	790	1811	9633	1168849	0.854177586	0.87747407	0.129226686	2	58	Imerí province	Potential early introduction	L	0.011182646	0	0.000661398	0.001516192	0.008064867	0.978574897	0.002177589
657	GBIF	PRESERVED_SPECIMEN	US	1322091067	SPECIES	Theobroma	cacao		Theobroma cacao L.	Reko, B.P.	4720	//1923	19.16487149	-103.9004805	1322091067	44237	1	1	1923	11501	0	7796	44779	400459	741056	0.621483746	0.659308612	0.17500547	29	47	Mesoamerica	Unequivocal early introduction	T	0.00953972	0	0.006466538	0.037142779	0.332168206	0.614682757	0.043609317
659	GBIF	PRESERVED_SPECIMEN	P	694272911	SPECIES	Theobroma	cacao		Theobroma cacao L.	Raunkier, C.	2526	//1906	17.7245968	-64.8347992	694272911	44263	1	1	1906	990395	0	2122	4572	11167	11301	-0.301033644	-0.32432431	0.223170108	4	48	North America	Unequivocal late introduction	B	0.971397381	0	0.002081296	0.004484301	0.010952796	0.011084226	0.006565597
660	GBIF	PRESERVED_SPECIMEN	XAL	2629556450	SPECIES	Theobroma	cacao		Theobroma cacao L.	Oca, R.M.	s.n.	//1884	17.963056	-94.881389	0	44204	1	1	1884	3050	0	661	3520	88355	1094706	0.757389281	0.780255616	0.115781944	23	48	Mesoamerica	Unequivocal early introduction	T	0.002562396	0	0.000555326	0.002957258	0.074229685	0.919695335	0.003512583
661	GBIF	PRESERVED_SPECIMEN	P	694272884	SPECIES	Theobroma	cacao		Theobroma cacao L.	Jobert, C.	542	//1877	-4.225059	-69.885677	694272884	44263	1	1	1877	63814	0	11215	38445	124314	967782	0.705068176	0.822925329	0.246650966	4	63	Imerí province	Potential early introduction	L	0.052932638	0	0.009302654	0.03188948	0.103116368	0.802758861	0.041192133
662	GBIF	PRESERVED_SPECIMEN	COI	2598868471	SPECIES	Theobroma	cacao		Theobroma cacao L.	Gossweiler, J.	s.n.	//	-4.565474	12.304688	0	44204	1	1	2022	55874	0	30350	124237	222760	178291	0.426730444	0.383499101	0.226347875	184	63	Africa	Unequivocal late introduction	D	0.091370243	0	0.049631078	0.203163634	0.364277398	0.291557647	0.252794712
663	GBIF	PRESERVED_SPECIMEN	L	2516420809	SPECIES	Theobroma	cacao		Theobroma cacao L.	Hulstijn, P.	353	//	-1.8268344	124.7740793	2516420809	44209	1	1	2022	1005465	0	4926	11224	20171	60448	-0.173067626	-0.215686277	0.302184927	111	61	Asia	Unequivocal late introduction	E	0.912206482	0	0.004469105	0.010182956	0.018300107	0.054841349	0.014652061
664	GBIF	PRESERVED_SPECIMEN	L	2516404790	SPECIES	Theobroma	cacao		Theobroma cacao L.	Korthals, P.W.	s.n.	//	-0.589724	101.3431058	2516404790	44209	1	1	2022	23562	0	6732	26718	162077	881493	0.732983109	0.823475599	0.198919303	126	60	Asia	Unequivocal late introduction	E	0.021408673	0	0.006116764	0.024276247	0.147264811	0.800933506	0.03039301
665	GBIF	PRESERVED_SPECIMEN	L	2513274713	SPECIES	Theobroma	cacao	Theobroma cacao. var. amenolato	Theobroma cacao L.	Leiden, B.L.	66130	//	52.156525	4.483532	0	44214	1	1	2022	59409	0	23351	79908	425624	617207	0.566092119	0.607077062	0.254149291	198	24	Europe	Unequivocal late introduction	C	0.049281667	0	0.019370402	0.066286243	0.353068729	0.511992959	0.085656645
666	GBIF	PRESERVED_SPECIMEN	MEL	2438097955	SPECIES	Theobroma	cacao		Theobroma cacao L.	s.c.	56	//	-6.6	106.8	0	44215	1	1	2022	356039	0	14930	52166	226985	555452	0.399941821	0.561941415	0.378201949	122	65	Asia	Unequivocal late introduction	E	0.295327861	0	0.012384163	0.043270746	0.18827992	0.46073731	0.055654909
667	GBIF	PRESERVED_SPECIMEN	MEL	2437708566	SPECIES	Theobroma	cacao		Theobroma cacao L.	Forster	s.n.	//	13.916667	-60.983333	0	44215	1	1	2022	1136238	0	2287	4482	12160	45575	-0.037961233	-0.079365082	0.189178948	1	50	Antilles	Unequivocal late introduction	A	0.946279884	0	0.001904656	0.003732692	0.010127071	0.037955697	0.005637348
668	GBIF	PRESERVED_SPECIMEN	US	2397779751	SPECIES	Theobroma	cacao	Theobroma cacao subsp. cacao (cultivar criollo)	Theobroma cacao L.	Miranda, F.	6644	//	17.511472	-93.1102345	2397779751	44221	1	1	2022	45001	0	5848	19150	122975	864524	0.691668806	0.751680374	0.220925482	22	48	Mesoamerica	Unequivocal early introduction	T	0.042554218	0	0.005530034	0.018108781	0.116288636	0.817518331	0.023638815
669	GBIF	PRESERVED_SPECIMEN	ICN	2013949165	SPECIES	Theobroma	cacao		Theobroma cacao L.	Garcia, A.	57	//	8.846076024	-74.97816585	0	44244	1	1	2022	62166	0	6611	20142	125698	163863	0.455077844	0.564958423	0.342295046	9	54	Magdalena province	Unequivocal early introduction	R	0.164251744	0	0.017467237	0.053218136	0.332112661	0.432950222	0.070685373
670	GBIF	PRESERVED_SPECIMEN	ICN	2013948430	SPECIES	Theobroma	cacao		Theobroma cacao L.	Hoyos, S. & Morcote-Rios, G.	s.n.	//	8.425565877	-77.29266854	0	44244	1	1	2022	678765	0	7155	19840	63026	413807	0.261064666	-0.036093418	0.412508189	10	54	Pacific dominion	Unequivocal early introduction	Q	0.573963316	0	0.006050264	0.016776693	0.053294751	0.349914975	0.022826957
671	GBIF	PRESERVED_SPECIMEN	MA	1936316291	SPECIES	Theobroma	cacao		Theobroma cacao L.	s.c.	6279	//	10.430278	-66.286111	0	44245	1	1	2022	324208	0	10775	29435	85690	755103	0.550625649	0.777835846	0.385064291	4	53	Pacific dominion	Unequivocal early introduction	Q	0.269005178	0	0.008940343	0.024423109	0.071099583	0.626531786	0.033363453
672	GBIF	PRESERVED_SPECIMEN	XAL	1894895741	SPECIES	Theobroma	cacao		Theobroma cacao L.	Jorge Cadena, I.	s.n.	//	17.675	-93.391667	0	44221	1	1	2022	45001	0	5848	19150	122975	864524	0.691668806	0.751680374	0.220925482	22	48	Mesoamerica	Unequivocal early introduction	T	0.042554218	0	0.005530034	0.018108781	0.116288636	0.817518331	0.023638815
673	GBIF	PRESERVED_SPECIMEN	INIF	1893418205	SPECIES	Theobroma	cacao		Theobroma cacao L.	L., A.G.; et al.	s.n.	//	17.391667	-93.008333	0	44221	1	1	2022	9230	0	3264	11591	74449	419675	0.694198138	0.739583313	0.176574975	22	48	Mesoamerica	Unequivocal early introduction	T	0.017811346	0	0.006298617	0.022367423	0.143665973	0.809856641	0.02866604
674	GBIF	PRESERVED_SPECIMEN	MPU	1837361839	SPECIES	Theobroma	cacao		Theobroma cacao L.	s.c	s.n.	//	10.4805937	-66.9036063	1837361839	44263	1	1	2022	324208	0	10775	29435	85690	755103	0.550625649	0.777835846	0.385064291	4	53	Pacific dominion	Unequivocal early introduction	Q	0.269005178	0	0.008940343	0.024423109	0.071099583	0.626531786	0.033363453
675	GBIF	PRESERVED_SPECIMEN	K	1421197213	SPECIES	Theobroma	cacao		Theobroma cacao L.	Milliken, W.	1816	//	1.5	-63	1421197213	44260	1	1	2022	3211	0	561	2713	43592	1155526	0.83780115	0.860273957	0.095983073	233	59	Pantepui province	Potential early introduction	O	0.002663397	0	0.000465327	0.002250326	0.03615784	0.958463109	0.002715653
678	GBIF	PRESERVED_SPECIMEN	HUCO	1249228603	SPECIES	Theobroma	cacao		Theobroma cacao L.	Grisales, L.F.; et al.	25	//	6.057847	-75.185367	0	44225	1	1	2022	12208	0	3250	10309	124422	948954	0.730005157	0.774602294	0.14826789	9	56	Magdalena province	Unequivocal early introduction	R	0.011106835	0	0.002956849	0.009379125	0.113199101	0.863358089	0.012335974
680	GBIF	PRESERVED_SPECIMEN	F	1228623817	SPECIES	Theobroma	cacao		Theobroma cacao L.	Williams, L.	s.n.	//	7.0758	-65.9119	0	44252	1	1	2022	55086	0	18296	115345	281696	651410	0.603817409	0.695067286	0.254694096	3	55	Pantepui province	Potential early introduction	O	0.049103565	0	0.016309023	0.102818334	0.251103328	0.58066575	0.119127357
681	GBIF	PRESERVED_SPECIMEN	G	1144793959	SPECIES	Theobroma	cacao		Theobroma cacao L.	Ventenat, E.P.G.	s.n.	//	-13.39444	-60.4225	0	44259	1	1	2022	1896	0	1785	7998	121207	1072717	0.76323263	0.802591264	0.132312537	229	69	Rondônia province	Potential early introduction	K	0.001572657	0	0.001480587	0.006634025	0.100536412	0.889776319	0.008114612
682	GBIF	PRESERVED_SPECIMEN	MFS	1090154370	SPECIES	Theobroma	cacao		Theobroma cacao L.	Leao, V.M.	9	//	-1.142147	-48.46115	0	44216	1	1	2022	331693	0	8572	27035	185859	652409	0.410442507	0.658553213	0.55760358	223	61	Pará province	Potential early introduction	H	0.275134211	0	0.007110341	0.022425114	0.154167164	0.54116317	0.029535455
683	GBIF	PRESERVED_SPECIMEN	MFS	1090154179	SPECIES	Theobroma	cacao		Theobroma cacao L.	Lucas, F.C.A.	s.n.	//	-1.357125	-48.521256	0	44216	1	1	2022	331693	0	8572	27035	185859	652409	0.410442507	0.658553213	0.55760358	223	61	Pará province	Potential early introduction	H	0.275134211	0	0.007110341	0.022425114	0.154167164	0.54116317	0.029535455
684	GBIF	PRESERVED_SPECIMEN	BHCB	1087608334	SPECIES	Theobroma	cacao		Theobroma cacao L.	Lombardi, J.A.	305	//	-19.865706	-43.96481	0	44238	1	1	2022	12680	0	8304	30976	219104	934529	0.689765363	0.735764802	0.171051546	218	74	South American Atlantic coast	Unequivocal late introduction	G	0.010517646	0	0.006887897	0.02569358	0.181739609	0.775161269	0.032581477
685	GBIF	PRESERVED_SPECIMEN	BM	1056895606	SPECIES	Theobroma	cacao		Theobroma cacao L.	Sloane, H.	s.n	//	18.151419	-77.319014	1056895606	44295	1	1	2022	642063	0	1865	6214	39607	514898	0.21747549	-0.119999997	0.553734601	12	47	Antilles	Unequivocal late introduction	A	0.532988502	0	0.001548171	0.005158358	0.032878511	0.427426458	0.006706529
686	GBIF	PRESERVED_SPECIMEN	BM	1056633632	SPECIES	Theobroma	cacao		Theobroma cacao L.	Whitefoord, C.; et al.	1083	//	17.217668	-88.684767	0	44216	1	1	2022	323042	0	14345	49049	217665	424029	0.388868378	0.494174123	0.41021799	19	48	Mesoamerica	Unequivocal early introduction	T	0.314203457	0	0.013952516	0.047707002	0.211709609	0.412427417	0.061659518
687	GBIF	PRESERVED_SPECIMEN	ABC	893314632	SPECIES	Theobroma	cacao		Theobroma cacao L.	A. Akoegninou, P.A.Y.	s.n.	//	6.733	2.133	0	44218	1	1	2022	75585	0	5192	30332	365570	156235	0.450128601	0.497766092	0.207313332	192	55	Africa	Unequivocal late introduction	D	0.119423808	0	0.008203326	0.047924363	0.57759822	0.246850283	0.056127689
688	GBIF	PRESERVED_SPECIMEN	ABC	893314527	SPECIES	Theobroma	cacao		Theobroma cacao L.	J.-, A.C.A.	s.n.	//	6.716	2.133	0	44218	1	1	2022	75585	0	5192	30332	365570	156235	0.450128601	0.497766092	0.207313332	192	55	Africa	Unequivocal late introduction	D	0.119423808	0	0.008203326	0.047924363	0.57759822	0.246850283	0.056127689
689	GBIF	PRESERVED_SPECIMEN	VASC	872341835	SPECIES	Theobroma	cacao		Theobroma cacao L.	R. Tupayachi, P.M.M. & Pena, L.	s.n.	//	-12.529992	-70.081818	0	44216	1	1	2022	13213	0	870	2866	9780	1178865	0.872079717	0.891252935	0.11648427	3	69	Rondônia province	Potential early introduction	K	0.010959743	0	0.000721636	0.002377251	0.008112184	0.977829186	0.003098887
690	GBIF	PRESERVED_SPECIMEN	CR	46083911	SUBSPECIES	Theobroma	cacao	Theobroma cacao. subsp. cacao	Theobroma cacao subsp. cacao	Thomsen, K.	s.n.	//	8.71	-83.51	0	44216	1	1	2022	573869	0	10540	26216	68443	526290	0.316018157	0.261051312	0.473064075	14	54	Puntarenas-Chiriquí province	Unequivocal early introduction	S	0.476098387	0	0.00874429	0.021749555	0.0567823	0.436625467	0.030493845
691	GBIF	PRESERVED_SPECIMEN	CR	46082643	SUBSPECIES	Theobroma	cacao	Theobroma cacao. subsp. cacao	Theobroma cacao subsp. cacao	L√≥pez, H.R.	s.n.	//	10.1204819	-85.46048521	0	44216	1	1	2022	452665	0	9418	46977	363966	332548	0.316451604	0.393114179	0.344930634	16	53	Puntarenas-Chiriquí province	Unequivocal early introduction	S	0.375476744	0	0.007812046	0.038966501	0.301902662	0.275842047	0.046778547
692	GBIF	PRESERVED_SPECIMEN	NY	2239550949	SPECIES	Theobroma	cacao		Theobroma cacao L.	Gonto, R.; et al.	6279	04/10/15	10.43027778	-66.28611111	2239550949	44242	4	10	2015	324208	0	10775	29435	85690	755103	0.550625649	0.777835846	0.385064291	4	53	Pacific dominion	Unequivocal early introduction	Q	0.269005178	0	0.008940343	0.024423109	0.071099583	0.626531786	0.033363453
693	GBIF	PRESERVED_SPECIMEN	F	1228602320	SPECIES	Theobroma	cacao		Theobroma cacao L.	Schunke, J.V. & Graham, J.G.	16661	04/05/05	-8.23215	-76.41101667	1228602320	44252	4	5	2005	21244	0	3520	9116	53274	517505	0.763019732	0.847871602	0.202486692	7	66	Ucayali province	Potential native area	V	0.035133852	0	0.005821463	0.015076266	0.088105858	0.855862561	0.020897729
695	GBIF	PRESERVED_SPECIMEN	MBM	1095497138	SPECIES	Theobroma	cacao		Theobroma cacao L.	Hastchbach, G. & Barbosa, E.	56993	33705	-14.5967264	-39.2854465	1095497138	44263	11	4	1992	140721	0	6661	25484	176828	855630	0.644052284	0.763287425	0.315930606	216	70	South American Atlantic coast	Unequivocal late introduction	G	0.116749521	0	0.005526315	0.021142863	0.146705782	0.709875519	0.026669178
696	GBIF	PRESERVED_SPECIMEN	F	1228217572	SPECIES	Theobroma	cacao		Theobroma cacao L.	V√°squez, R. & Jaramillo, N.	10085	32098	-4.833333333	-73.75	1228217572	44259	17	11	1987	53201	0	8794	28661	103005	1011908	0.71553712	0.807957888	0.218287162	6	63	Madeira province	Potential early introduction	J	0.04412937	0	0.007294481	0.023773836	0.085440983	0.839361331	0.031068317
697	GBIF	PRESERVED_SPECIMEN	NY	1949841559	SPECIES	Theobroma	cacao		Theobroma cacao L.	Peters, C.	85	31293	-4.9683542	-73.7584665	1949841559	44245	3	9	1985	53201	0	8794	28661	103005	1011908	0.71553712	0.807957888	0.218287162	6	63	Madeira province	Potential early introduction	J	0.04412937	0	0.007294481	0.023773836	0.085440983	0.839361331	0.031068317
699	GBIF	PRESERVED_SPECIMEN	F	1228338893	SPECIES	Theobroma	cacao		Theobroma cacao L.	Marles, R.	45	31178	-1.116666667	-77.6	1228338893	44258	11	5	1985	79920	0	10980	27340	80213	1006289	0.715861168	0.815963745	0.227841836	9	61	Napo province	Potential native area	U	0.066337855	0	0.009113985	0.022693656	0.066581061	0.835273444	0.03180764
700	GBIF	PRESERVED_SPECIMEN	MBM	1095545964	SPECIES	Theobroma	cacao		Theobroma cacao L.	Mart√≠nez, E.M.	8748	30979	16.9087202	-92.0943704	1095545964	44260	24	10	1984	29051	0	7686	72963	362476	733413	0.617362464	0.686446905	0.219271385	21	48	Mesoamerica	Unequivocal early introduction	T	0.024096935	0	0.006375307	0.060520625	0.300662995	0.608344137	0.066895932
701	GBIF	PRESERVED_SPECIMEN	F	1228343766	SPECIES	Theobroma	cacao		Theobroma cacao L.	Irvine, D.	418	30627	-0.5	-77.33333333	1228343766	44258	7	11	1983	32165	0	5136	13067	40333	725357	0.748574975	0.816042781	0.188949766	9	60	Napo province	Potential native area	U	0.039415091	0	0.00629367	0.016012342	0.049424183	0.888854714	0.022306013
702	GBIF	PRESERVED_SPECIMEN	F	1228533596	SPECIES	Theobroma	cacao		Theobroma cacao L.	Gentry, A.H.; et al.	43282	30529	-11.86666667	-71.36666667	1228533596	44256	1	8	1983	8873	0	690	2172	7592	1186261	0.858682096	0.87120074	0.091802938	4	68	Rondônia province	Potential early introduction	K	0.007359894	0	0.000572335	0.001801611	0.006297342	0.983968819	0.002373945
703	GBIF	PRESERVED_SPECIMEN	F	1228357658	SPECIES	Theobroma	cacao		Theobroma cacao L.	Gentry, A.H.; et al.	42814	30506	-3.466666667	-72.83333333	1228357658	44258	9	7	1983	22660	0	283	975	5074	664740	0.800708203	0.84028393	0.184667222	6	62	Imerí province	Potential early introduction	L	0.032663911	0	0.000407939	0.001405442	0.007314064	0.958208645	0.00181338
704	GBIF	PRESERVED_SPECIMEN	MBM	1095440465	SPECIES	Theobroma	cacao		Theobroma cacao L.	Spichiger, R.; et al.	1113	29909	-4.907916	-73.6668655	1095440465	44263	19	11	1981	53201	0	8794	28661	103005	1011908	0.71553712	0.807957888	0.218287162	6	63	Madeira province	Potential early introduction	J	0.04412937	0	0.007294481	0.023773836	0.085440983	0.839361331	0.031068317
705	GBIF	PRESERVED_SPECIMEN	F	1228175196	SPECIES	Theobroma	cacao		Theobroma cacao L.	Moore, G.; et al.	149	29816	-3.822219	-73.3255442	1228175196	44259	18	8	1981	64029	0	8404	27264	104842	1001049	0.705524528	0.806079984	0.23019889	6	63	Napo province	Potential native area	U	0.053110184	0	0.006970872	0.022614691	0.086963374	0.830340879	0.029585563
706	GBIF	PRESERVED_SPECIMEN	F	1228522368	SPECIES	Theobroma	cacao		Theobroma cacao L.	Gentry, A.H.; et al.	31156	29627	-8.666666667	-75	1228522368	44256	10	2	1981	27602	0	8241	27285	87697	1054770	0.771405445	0.852017939	0.190325478	7	66	Ucayali province	Potential native area	V	0.022894919	0	0.006835629	0.022631978	0.072741675	0.874895798	0.029467607
707	GBIF	PRESERVED_SPECIMEN	NY	1929365284	SPECIES	Theobroma	cacao		Theobroma cacao L.	Mej√≠a, M. & Ramirez, C.	9937	29573	18.96666667	-68.96666667	1929365284	44249	18	12	1980	294837	0	35494	84412	145305	28663	0.170820831	0.137931034	0.231426732	7	47	Antilles	Unequivocal late introduction	A	0.500817889	0	0.060291043	0.143384445	0.246818898	0.048687726	0.203675488
708	GBIF	PRESERVED_SPECIMEN	F	1228265237	SPECIES	Theobroma	cacao	Theobroma cacao subsp. leiocarpum	Theobroma cacao L.	Revilla, J.	840	27960	-3.3195704	-71.8600978	1228265237	44258	19	7	1976	26463	0	1352	4718	22795	1150271	0.794087188	0.831438124	0.169150874	5	62	Imerí province	Potential early introduction	L	0.021950085	0	0.001121434	0.003913407	0.018907614	0.95410746	0.005034842
709	GBIF	PRESERVED_SPECIMEN	F	1228587120	SPECIES	Theobroma	cacao		Theobroma cacao L.	Gentry, A.H.; et al.	15649	27766	-3.7436735	-73.2516326	1228587120	44256	7	1	1976	64029	0	8404	27264	104842	1001049	0.705524528	0.806079984	0.23019889	173	112	Napo province	Potential native area	U	0.053110184	0	0.006970872	0.022614691	0.086963374	0.830340879	0.029585563
710	GBIF	PRESERVED_SPECIMEN	F	1228353896	SPECIES	Theobroma	cacao		Theobroma cacao L.	Vickers, W.T.	132	27442	-0.1882903	-76.6421554	1228353896	44258	17	2	1975	21255	0	1892	6179	27192	1149029	0.816607505	0.854238331	0.146636219	9	60	Napo province	Potential native area	U	0.017631001	0	0.001569412	0.005125474	0.022555736	0.953118377	0.006694886
711	GBIF	PRESERVED_SPECIMEN	NY	2235405964	SPECIES	Theobroma	cacao		Theobroma cacao L.	Brumbach, W.C.	8575	27193	40.3451566	-75.9927652	2235405964	44244	13	6	1974	80253	0	35296	160907	541367	49986	0.358695966	0.385925084	0.204689992	14	32	North America	Unequivocal late introduction	B	0.092477723	0	0.040672544	0.185417529	0.623831972	0.057600232	0.226090073
712	GBIF	PRESERVED_SPECIMEN	P	694272809	SPECIES	Theobroma	cacao		Theobroma cacao L.	McKee, H.S.	24262	26188	-15.2209613	166.8404996	694272809	44266	12	9	1971	699607	0	3854	9268	19151	146586	0.007199599	-0.127272725	0.408203494	82	71	Oceania and Pacific islands	Unequivocal late introduction	F	0.796396218	0	0.004387193	0.010550209	0.021800502	0.166865878	0.014937402
713	GBIF	PRESERVED_SPECIMEN	F	1228600619	SPECIES	Theobroma	cacao	Theobroma cacao subsp. sphaerocarpa	Theobroma cacao L.	Schunke, J.V.	1402	24464	-8.3750108	-74.834856	1228600619	44252	23	12	1966	51885	0	3916	13682	66056	1069959	0.763487578	0.854629934	0.225437447	7	66	Ucayali province	Potential native area	V	0.043040304	0	0.00324845	0.011349666	0.054795611	0.887565969	0.014598116
714	GBIF	PRESERVED_SPECIMEN	MBM	1095498897	SPECIES	Theobroma	cacao		Theobroma cacao L.	Contreras, E.	5913	24326	15.4036847	-89.1384441	1095498897	44260	7	8	1966	109566	0	1450	7034	221082	866303	0.631629512	0.713862538	0.246677162	19	49	Mesoamerica	Unequivocal early introduction	T	0.090893329	0	0.001202885	0.005835238	0.183404331	0.718664217	0.007038123
715	GBIF	PRESERVED_SPECIMEN	F	1228600665	SPECIES	Theobroma	cacao	Theobroma cacao subsp. leiocarpum	Theobroma cacao L.	Dodson, C.H. & Torres, J.	2966	23698	-3.5493075	-73.4180211	1228600665	44252	17	11	1964	75884	0	18956	59654	166811	884275	0.688677822	0.838352233	0.270001605	6	62	Napo province	Potential native area	U	0.062943977	0	0.015723552	0.049481577	0.138365766	0.733485127	0.065205129
716	GBIF	PRESERVED_SPECIMEN	NY	1928705834	SPECIES	Theobroma	cacao		Theobroma cacao L.	Proctor, G.R.	18348	21505	18.1730042	-77.4902726	1928705834	44251	16	11	1958	642063	0	1865	6214	39607	514898	0.21747549	-0.119999997	0.553734601	12	47	Antilles	Unequivocal late introduction	A	0.532988502	0	0.001548171	0.005158358	0.032878511	0.427426458	0.006706529
717	GBIF	PRESERVED_SPECIMEN	P	694272846	SPECIES	Theobroma	cacao		Theobroma cacao L.	Cuadra, A.	2353	18117	5.7214279	117.8118307	694272846	44263	7	8	1949	220130	0	12381	34864	95543	842658	0.601856163	0.8233684	0.405492052	117	56	Asia	Unequivocal late introduction	E	0.182593217	0	0.01026978	0.028918957	0.079250914	0.698967133	0.039188736
718	GBIF	PRESERVED_SPECIMEN	F	1228525841	SPECIES	Theobroma	cacao		Theobroma cacao L.	Hodge, W.H.	6715	16848	6.2476376	-75.5658153	1228525841	44256	15	2	1946	19053	0	4351	10946	34099	263413	0.688565752	0.776061773	0.2239946	9	56	Magdalena province	Unequivocal early introduction	R	0.057412418	0	0.013110871	0.03298359	0.102750541	0.79374258	0.046094461
719	GBIF	PRESERVED_SPECIMEN	F	1228334772	SPECIES	Theobroma	cacao		Theobroma cacao L.	Garganta, M.	717	16034	7.0803339	-73.171039	1228334772	44258	24	11	1943	16391	0	4670	21100	109286	190609	0.590285056	0.647540987	0.227435749	7	55	Magdalena province	Unequivocal early introduction	R	0.047919054	0	0.013652735	0.061685806	0.319497392	0.557245013	0.075338541
721	GBIF	PRESERVED_SPECIMEN	COL	1890898586	SPECIES	Theobroma	cacao		Theobroma cacao L.	Ranghel-Galindo, A.	195	15497	1.742024021	-75.62069252	1890898586	44249	5	6	1942	53112	0	7134	38315	208695	898313	0.645858117	0.691591322	0.200438716	8	59	Napo province	Potential native area	U	0.044055546	0	0.005917538	0.031781673	0.173109129	0.745136114	0.037699211
722	GBIF	PRESERVED_SPECIMEN	US	1320353422	SPECIES	Theobroma	cacao	Theobroma leiocarpum	Theobroma cacao L.	Cuatrecasas, J.	13329	15300	6.9953528	-72.2525461	1228338633	44295	20	11	1941	88738	0	10508	41613	364350	700314	0.582922446	0.639297009	0.224224875	7	55	Paramo province	Potential early introduction	P	0.073609545	0	0.008716549	0.034518628	0.302233968	0.58092131	0.043235177
