# Supplementary material for: Human influence on the distribution of cacao: insights from remote sensing and biogeography
Source: Springer Nature journal article supplement (doi:10.1007/s10531-023-02777-7), 2024-02-10
Supplement: MOESM1 [file 26722336 › Supplementary/AppendixS1 - Datasets/Theobroma_wild_relatives_occs.txt]

insertion.by.Matheus.in	INTERNAL.ID	source	basisOfRecord	institutionCode	gbifID	taxonRank	genus	specificEpithet	name.in.label..if.variant	scientific.name..current.determ.	collector	collectornumber	dateofcollection	decimallatitude	decimallongitude	Elected.gbifID.for.image.examined	Last.checked.in.insert.date	AREA_GROUP	Freq_NDVI_Water	Freq_NDVI_Built.up	Freq_NDVI_Barren_Lands	Freq_NDVI_Shrubs_Grasslands	Freq_NDVI_Sparse_Vegetation	Freq_NDVI_Forests	mean_NDVI	median_NDVI	stdev_NDVI	Freq_NDVI_Water.1	Freq_NDVI_Built.up.1	Freq_NDVI_Barren_Lands.1	Freq_NDVI_Shrubs_Grasslands.1	Freq_NDVI_Sparse_Vegetation.1	Freq_NDVI_Forests.1
03/08/20	5	GBIF	PRESERVED_SPECIMEN	ICESI	2817501038	SPECIES	Theobroma	cirmolinae	0	Theobroma cirmolinae Cuatrec.	Diaz, O.; et al.	1607	29/09/18	3.576056	-76.882833	0	22/09/20	Cauca province	0	0	0	0	0	0	0	0	0	NA	NA	NA	NA	NA	NA
03/08/20	6	GBIF	PRESERVED_SPECIMEN	ICESI	2817500561	SPECIES	Theobroma	cirmolinae	0	Theobroma cirmolinae Cuatrec.	DÃ­as, O.; et al.	1455	14/07/18	3.552167	-76.891028	0	22/09/20	Cauca province	0	0	0	0	0	0	0	0	0	NA	NA	NA	NA	NA	NA
03/08/20	7	GBIF	PRESERVED_SPECIMEN	MO	2817387328	SPECIES	Theobroma	guianense	0	Theobroma guianense (Aubl.) J.F.Gmel.	Ceron, C.E. & Davila, T.	36739	29/08/98	0	0	0	26/11/20	0	0	0	0	0	0	0	0	0	0	NA	NA	NA	NA	NA	NA
03/08/20	8	GBIF	PRESERVED_SPECIMEN	SP	2814664382	SPECIES	Theobroma	guianense	0	Theobroma guianense (Aubl.) J.F.Gmel.	Brito, J.M.; et al.	2	24/03/95	-2.883333	-59.966667	1930137453	26/11/20	Roraima province	162096	0	0	27965	95764	796175	0.615719998	0.799432695	0.378651822	0.14981146	0	0	0.025845656	0.08850647	0.735836414
03/08/20	9	GBIF	PRESERVED_SPECIMEN	SP	2814661366	SPECIES	Theobroma	sylvestre	0	Theobroma sylvestre Mart.	Vicentini, A.; et al.	935	24/04/95	-2.883333	-59.966667	1042667365	25/08/20	Roraima province	162096	0	0	27965	95764	796175	0.615719998	0.799432695	0.378651822	0.14981146	0	0	0.025845656	0.08850647	0.735836414
03/08/20	594	GBIF	PRESERVED_SPECIMEN	U	2517559452	SPECIES	Theobroma	speciosum	0	Theobroma speciosum Willd. ex Spreng.	Ellenberg, H.	2565	24/07/57	-8.433333	-74.6	2515518113	10/08/20	Ucayali province	55801	0	0	13682	66056	1069959	0.763487578	0.854629934	0.225437447	0.046288754	0	0	0.011349666	0.054795611	0.887565969
03/08/20	2960	GBIF	PRESERVED_SPECIMEN	NY	1930034146	SPECIES	Theobroma	guianense	0	Theobroma guianense (Aubl.) J.F.Gmel.	Troya, P.M. & Vega, M.	91	22/01/92	-2.6206	-77.7847	1322452713	25/03/21	Napo province	71377	0	0	31797	104105	847181	0.723139903	0.838561118	0.23733575	0.067690571	0	0	0.030154771	0.098728259	0.803426398
03/08/20	281	GBIF	PRESERVED_SPECIMEN	DAV	2626928002	SPECIES	Herrania	nitida	0	Herrania nitida (Poepp.) R.E.Schult.	Webster, G.L.	23401	01/09/78	-3.4148029	-72.7994306	0	25/04/21	Imerí province	22943	0	0	975	5074	664740	0.800708203	0.84028393	0.184667222	0.033071849	0	0	0.001405442	0.007314064	0.958208645
03/08/20	286	GBIF	PRESERVED_SPECIMEN	WAG	2626730363	SPECIES	Theobroma	mammosum	0	Theobroma mammosum Cuatrec. & J.LeÃ³n	Poole, H.A.C.	39	01/01/66	9.9	-83.683333	2626730363	30/10/20	Puntarenas-Chiriquí province	350250	0	0	33738	101317	719380	0.488029121	0.739880562	0.463435559	0.290739903	0	0	0.028005661	0.084102483	0.597151953
03/08/20	2115	GBIF	PRESERVED_SPECIMEN	ICN	2013949096	SPECIES	Theobroma	glaucum	0	Theobroma glaucum H.Karst.	Ramirez, J.G.; et al.	7214	09/03/00	2.53	-72.64	768752689	04/09/20	Imerí province	6665	0	0	1536	71873	1125524	0.7592053	0.802800477	0.108903987	0.005528377	0	0	0.001274057	0.059616058	0.933581509
03/08/20	290	GBIF	PRESERVED_SPECIMEN	WAG	2626728351	SPECIES	Theobroma	simiarum	0	Theobroma simiarum Donn.Sm.	Poole, H.A.C.	41	01/01/66	9.9	-83.683333	2626728351	22/10/20	Puntarenas-Chiriquí province	350250	0	0	33738	101317	719380	0.488029121	0.739880562	0.463435559	0.290739903	0	0	0.028005661	0.084102483	0.597151953
03/08/20	292	GBIF	PRESERVED_SPECIMEN	WAG	2626726353	SPECIES	Theobroma	guianense	0	Theobroma guianense (Aubl.) J.F.Gmel.	Feuillet, C.P.G.A.; et al.	10096	16/06/88	4.3	-52.366667	2626726353	26/11/20	Guianan Lowlands province	0	0	0	0	0	0	0	0	0	NA	NA	NA	NA	NA	NA
03/08/20	297	GBIF	PRESERVED_SPECIMEN	WAG	2626720355	SPECIES	Theobroma	microcarpum	0	Theobroma microcarpum Mart.	Poole, H.A.C.	40	01/01/66	9.9	-83.683333	2626720355	14/09/20	Puntarenas-Chiriquí province	350250	0	0	33738	101317	719380	0.488029121	0.739880562	0.463435559	0.290739903	0	0	0.028005661	0.084102483	0.597151953
03/08/20	303	GBIF	PRESERVED_SPECIMEN	WAG	2626714353	SPECIES	Herrania	albiflora	0	Herrania albiflora Goudot	Poole, H.A.C.	43	01/01/66	9.90606	-83.71672	2626698344	06/11/20	Puntarenas-Chiriquí province	350250	0	0	33738	101317	719380	0.488029121	0.739880562	0.463435559	0.290739903	0	0	0.028005661	0.084102483	0.597151953
03/08/20	333	GBIF	PRESERVED_SPECIMEN	SP	2620327352	SPECIES	Theobroma	sylvestre	0	Theobroma sylvestre Mart.	Kukle, P.	181	12/12/89	-2.4166667	-59.9	1321873029	25/08/20	Roraima province	6545	0	0	20154	114886	468460	0.71438405	0.820109963	0.181457055	0.010728717	0	0	0.033036907	0.188323812	0.767910564
03/08/20	366	GBIF	PRESERVED_SPECIMEN	F	2612131398	SPECIES	Theobroma	guianense	0	Theobroma guianense (Aubl.) J.F.Gmel.	CastaÃ±o, N.; et al.	10769	03/05/18	1.276639	-72.634972	2612131398	26/11/20	Imerí province	3506	0	0	984	16976	1184136	0.819544362	0.834019184	0.075025812	0.002908091	0	0	0.00081619	0.014080932	0.982194787
03/08/20	829	GBIF	PRESERVED_SPECIMEN	U	2515625211	SPECIES	Theobroma	speciosum	0	Theobroma speciosum Willd. ex Spreng.	Maas, P.J.M.	4544	09/09/80	-8.374044	-74.465292	2515599415	11/08/20	Ucayali province	55801	0	0	13682	66056	1069959	0.763487578	0.854629934	0.225437447	0.046288754	0	0	0.011349666	0.054795611	0.887565969
03/08/20	489	GBIF	PRESERVED_SPECIMEN	Z	2575486749	SPECIES	Theobroma	glaucum	0	Theobroma glaucum H.Karst.	Liesner, R.L.	1329	30/03/73	9.25138	-78.9575	2235660148	08/09/20	Pacific dominion	0	0	0	0	0	0	0	0	0	NA	NA	NA	NA	NA	NA
03/08/20	6028	GBIF	PRESERVED_SPECIMEN	US	1319500036	SPECIES	Herrania	albiflora	0	Herrania albiflora Goudot	Haught, O.L.	1598	25/03/35	6.47779	-74.42626	1228172632	09/11/20	Magdalena province	81176	0	0	55410	328746	740243	0.614404386	0.664611578	0.224985237	0.067333845	0	0	0.045961471	0.272688136	0.614016548
03/08/20	576	GBIF	PRESERVED_SPECIMEN	WAG	2517879208	SPECIES	Herrania	nycterodendron	0	Herrania nycterodendron R.E.Schult.	Poole, H.A.C.	46	01/01/66	0	0	2516173372	04/06/21	0	0	0	0	0	0	0	0	0	0	NA	NA	NA	NA	NA	NA
03/08/20	578	GBIF	PRESERVED_SPECIMEN	WAG	2517872115	SPECIES	Herrania	umbratica	0	Herrania umbratica R.E.Schult.	Poole, H.A.C.	48	01/01/66	9.90606	-83.7167	2517872115	09/11/20	Puntarenas-Chiriquí province	350250	0	0	33738	101317	719380	0.488029121	0.739880562	0.463435559	0.290739903	0	0	0.028005661	0.084102483	0.597151953
03/08/20	11432	GBIF	PRESERVED_SPECIMEN	MO	1259056008	SPECIES	Herrania	albiflora	0	Herrania albiflora Goudot	Alvaro Cogollo, P.	4575	23/05/90	6.1	-74.8	1259056008	09/11/20	Magdalena province	31946	0	0	13044	275986	884611	0.685555121	0.736332417	0.187832974	0.026498295	0	0	0.010819626	0.228922508	0.733759571
03/08/20	5192	GBIF	PRESERVED_SPECIMEN	US	1322530751	SPECIES	Herrania	albiflora	0	Herrania albiflora Goudot	Garcia-Barriga, H. & Lozano, G.	18230	10/05/65	0	0	1317284199	20/04/22	0	0	0	0	0	0	0	0	0	0	NA	NA	NA	NA	NA	NA
03/08/20	933	GBIF	PRESERVED_SPECIMEN	U	2515404875	SPECIES	Theobroma	velutinum	0	Theobroma velutinum Benoist	s.c.	7444	05/04/56	0	0	2515404875	10/08/20	0	0	0	0	0	0	0	0	0	0	NA	NA	NA	NA	NA	NA
03/08/20	584	GBIF	PRESERVED_SPECIMEN	U	2517641185	SPECIES	Theobroma	velutinum	0	Theobroma velutinum Benoist	Granville, J.J.; et al.	6526	05/02/84	4.5833333	-53.3	2517045281	05/08/20	Guianan Lowlands province	6304	0	0	6416	22257	602170	0.833814834	0.869489789	0.128601255	0.009894106	0	0	0.01006989	0.034932284	0.94510372
03/08/20	586	GBIF	PRESERVED_SPECIMEN	U	2517635018	SPECIES	Theobroma	microcarpum	0	Theobroma microcarpum Mart.	Krukoff, B.A.	6203	14/09/34	-6.987642	-62.683954	1928119002	14/09/20	Madeira province	40381	0	0	4172	28957	1132007	0.795161471	0.851083875	0.194480831	0.033496832	0	0	0.003460756	0.0240204	0.939022013
03/08/20	587	GBIF	PRESERVED_SPECIMEN	U	2517635016	SPECIES	Theobroma	obovatum	0	Theobroma obovatum Klotzsch ex Bernoulli	Krukoff, B.A.	1668	23/12/31	0	0	1930227305	22/09/20	0	0	0	0	0	0	0	0	0	0	NA	NA	NA	NA	NA	NA
03/08/20	588	GBIF	PRESERVED_SPECIMEN	U	2517634110	SPECIES	Theobroma	guianense	Theobroma guianense	Theobroma guianense (Aubl.) J.F.Gmel.	Jansen-Jacobs, M.J.; et al.	2334	03/02/91	2.166667	-59.25	2517422994	30/11/20	Guianan Lowlands province	89310	0	0	176182	209116	608029	0.58049119	0.706547618	0.267010169	0.082493024	0	0	0.162734139	0.193154307	0.56161853
03/08/20	591	GBIF	PRESERVED_SPECIMEN	U	2517612103	SPECIES	Theobroma	obovatum	0	Theobroma obovatum Klotzsch ex Bernoulli	Krukoff, B.A.	5759	03/09/33	-9.3333333	-69	1929687819	22/09/20	Rondônia province	60260	0	0	31055	108409	1005865	0.72156287	0.822488785	0.204461702	0.049983867	0	0	0.025759193	0.089922022	0.834334918
03/08/20	592	GBIF	PRESERVED_SPECIMEN	U	2517577078	SPECIES	Theobroma	cirmolinae	0	Theobroma cirmolinae Cuatrec.	Cuatrecasas, J.	15336	09/11/43	3.869426533	-76.52905107	1228430458	20/10/20	Cauca province	0	0	0	0	0	0	0	0	0	NA	NA	NA	NA	NA	NA
03/08/20	593	GBIF	PRESERVED_SPECIMEN	U	2517576651	SPECIES	Theobroma	guianense	0	Theobroma guianense (Aubl.) J.F.Gmel.	Prevost, M.-F. & Sabatier, D.	PrÃ©vost,-M-F;-Sabatier,-D-3792	15/03/00	5.2833	-53.05	2517418989	30/11/20	Guianan Lowlands province	0	0	0	0	0	0	0	0	0	NA	NA	NA	NA	NA	NA
03/08/20	595	GBIF	PRESERVED_SPECIMEN	WAG	2517548532	SPECIES	Herrania	purpurea	0	Herrania purpurea (Pittier) R.E.Schult.	Poole, H.A.C.	47	01/01/66	9.90598	-83.7168	2516157968	07/12/20	Puntarenas-Chiriquí province	350250	0	0	33738	101317	719380	0.488029121	0.739880562	0.463435559	0.290739903	0	0	0.028005661	0.084102483	0.597151953
03/08/20	599	GBIF	PRESERVED_SPECIMEN	U	2517500009	SPECIES	Theobroma	sylvestre	0	Theobroma sylvestre Mart.	Prance, G.T.; et al.	17957	15/09/73	0	0	1931247267	25/08/20	0	0	0	0	0	0	0	0	0	0	NA	NA	NA	NA	NA	NA
03/08/20	600	GBIF	PRESERVED_SPECIMEN	U	2517500008	SPECIES	Theobroma	guianense	0	Theobroma guianense (Aubl.) J.F.Gmel.	Clarke, H.D.; et al.	7819	12/09/98	1.421389	-58.951944	2517500008	30/11/20	Roraima province	11601	0	0	9460	24408	555908	0.793598664	0.837019086	0.147858337	0.019290728	0	0	0.015730565	0.040586853	0.924391854
03/08/20	601	GBIF	PRESERVED_SPECIMEN	U	2517499986	SPECIES	Herrania	lemniscata	0	Herrania lemniscata (Schomb.) R.E.Schult.	Andel, T.R.; et al.	622	13/12/95	7.366667	-59.7	2517499986	10/11/20	Guianan Lowlands province	0	0	0	0	0	0	0	0	0	NA	NA	NA	NA	NA	NA
03/08/20	604	GBIF	PRESERVED_SPECIMEN	U	2517484031	SPECIES	Theobroma	guianense	0	Theobroma guianense (Aubl.) J.F.Gmel.	Prance, G.T.; et al.	2437	20/09/66	-8.833843	-67.312245	1930860419	30/11/20	Madeira province	10563	0	0	1387	15258	1178388	0.845348066	0.867755711	0.111152511	0.008761642	0	0	0.001150468	0.012655981	0.977431909
03/08/20	609	GBIF	PRESERVED_SPECIMEN	U	2517475979	SPECIES	Herrania	kanukuensis	0	Herrania kanukuensis R.E.Schult.	Gonggrijp, J.W.	4101	26/11/18	0	0	2517441969	16/04/21	0	0	0	0	0	0	0	0	0	0	NA	NA	NA	NA	NA	NA
03/08/20	610	GBIF	PRESERVED_SPECIMEN	U	2517475978	SPECIES	Herrania	cuatrecasana	0	Herrania cuatrecasana GarcÃ­a-Barr.	Schultes, R.E. & Cabrera, I.	18715	17/03/53	1	-76.5	2517475978	16/12/20	Napo province	0	0	0	0	0	0	0	0	0	NA	NA	NA	NA	NA	NA
03/08/20	613	GBIF	PRESERVED_SPECIMEN	U	2517470034	SPECIES	Theobroma	guianense	0	Theobroma guianense (Aubl.) J.F.Gmel.	Prance, G.T.; et al.	13939	01/07/71	-7.4667	-65.2833	1930261107	30/11/20	Madeira province	25634	0	0	9152	41646	1129148	0.811733233	0.862559259	0.183258002	0.021262795	0	0	0.007591367	0.034544369	0.93660147
03/08/20	614	GBIF	PRESERVED_SPECIMEN	U	2517466105	SPECIES	Theobroma	microcarpum	0	Theobroma microcarpum Mart.	Prance, G.T.; et al.	11014	15/03/71	2.443722	-60.919436	1928201263	14/09/20	Pantepui province	26562	0	0	46862	217529	914643	0.701832506	0.811019361	0.216214222	0.022032256	0	0	0.038870401	0.180432749	0.758664594
03/08/20	616	GBIF	PRESERVED_SPECIMEN	U	2517466047	SPECIES	Theobroma	guianense	0	Theobroma guianense (Aubl.) J.F.Gmel.	Santos, M.R.	473	05/12/78	-0.763642	-52.575914	1929252806	01/12/20	Roraima province	53201	0	0	43085	139777	896304	0.718129529	0.831293225	0.219116842	0.046982118	0	0	0.038048619	0.123437896	0.791531367
03/08/20	14127	GBIF	PRESERVED_SPECIMEN	INPA	1042629286	SPECIES	Herrania	mariae	0	Herrania mariae (Mart.) Decne. ex Goudot	Rodrigues, W. & CoÃªlho, D.F.	8345	13/11/67	0.375435	-68.0015387	1042629286	05/05/21	Imerí province	33100	0	0	8614	30999	1132521	0.791163754	0.832732499	0.15429849	0.027463546	0	0	0.00714716	0.025720317	0.939668977
03/08/20	620	GBIF	PRESERVED_SPECIMEN	U	2517463969	SPECIES	Theobroma	guianense	0	Theobroma guianense (Aubl.) J.F.Gmel.	Lescure, G.	815	21/12/78	3.895241	-51.81031	2517463969	18/12/20	Guianan Lowlands province	0	0	0	0	0	0	0	0	0	NA	NA	NA	NA	NA	NA
03/08/20	4210	GBIF	PRESERVED_SPECIMEN	FMB	1707505722	SPECIES	Theobroma	guianense	0	Theobroma guianense (Aubl.) J.F.Gmel.	Rudas, A. & Aguila, F.	1274	14/02/91	-3.783333	-70.25	1707505722	05/03/21	Imerí province	51884	0	0	20991	72181	650100	0.692628188	0.798938602	0.245448333	0.065250089	0	0	0.026398593	0.090775898	0.817575419
03/08/20	625	GBIF	PRESERVED_SPECIMEN	U	2517463005	SPECIES	Theobroma	guianense	Theobroma guianense	Theobroma guianense (Aubl.) J.F.Gmel.	Krukoff, B.A.	7016	12/10-6/11/1934	-7.5169609	-63.0298508	2517463005	18/12/20	Madeira province	40646	0	0	17328	90765	860067	0.736639093	0.822811872	0.218325676	0.040291196	0	0	0.017176742	0.0899727	0.852559362
03/08/20	626	GBIF	PRESERVED_SPECIMEN	U	2517462981	SPECIES	Herrania	lemniscata	0	Herrania lemniscata (Schomb.) R.E.Schult.	Fanshawe, D.B.	1764	20/03/44	5.56118	-58.40597	2517462981	10/11/20	Guianan Lowlands province	0	0	0	0	0	0	0	0	0	NA	NA	NA	NA	NA	NA
03/08/20	629	GBIF	PRESERVED_SPECIMEN	U	2517461003	SPECIES	Theobroma	guianense	0	Theobroma guianense (Aubl.) J.F.Gmel.	Oldeman, R.A.A.	2224	27/02/69	4.1442303	-52.4678454	2517461003	18/12/20	Guianan Lowlands province	0	0	0	0	0	0	0	0	0	NA	NA	NA	NA	NA	NA
03/08/20	630	GBIF	PRESERVED_SPECIMEN	U	2517461002	SPECIES	Theobroma	microcarpum	0	Theobroma microcarpum Mart.	Berg, C.C.; et al.	P18394	10/10/73	-10.2	-59.35	2517461002	12/04/21	Madeira province	2112	0	0	1806	20267	781935	0.834944039	0.873714089	0.099332484	0.002619957	0	0	0.002240361	0.025141418	0.969998263
03/08/20	631	GBIF	PRESERVED_SPECIMEN	U	2517461001	SPECIES	Theobroma	obovatum	0	Theobroma obovatum Klotzsch ex Bernoulli	Ellenberg, H.	2551	24/07/57	-8.433333	-74.6	2517461001	12/04/21	Ucayali province	55801	0	0	13682	66056	1069959	0.763487578	0.854629934	0.225437447	0.046288754	0	0	0.011349666	0.054795611	0.887565969
03/08/20	632	GBIF	PRESERVED_SPECIMEN	U	2517460974	SPECIES	Herrania	nitida	0	Herrania nitida (Poepp.) R.E.Schult.	Maas, P.J.M.; et al.	6203	05/11/84	0	0	2517460974	16/02/22	0	0	0	0	0	0	0	0	0	0	NA	NA	NA	NA	NA	NA
03/08/20	4884	GBIF	PRESERVED_SPECIMEN	RB	1424167278	SPECIES	Theobroma	speciosum	Theobroma speciosum var. coriaceum	Theobroma speciosum Willd. ex Spreng.	Huber, J.E.	1567	21/12/08	0	0	1424167278	18/08/20	0	0	0	0	0	0	0	0	0	0	NA	NA	NA	NA	NA	NA
03/08/20	636	GBIF	PRESERVED_SPECIMEN	U	2517456922	SPECIES	Herrania	camargoana	0	Herrania camargoana R.E.Schult.	Schultes, R.E. & Baker, R.E.D.	18050	26/10/52	1.8333333	-67	2517456922	12/11/20	Imerí province	10287	0	0	2115	22566	993810	0.810458125	0.838587642	0.108494379	0.009999242	0	0	0.002055837	0.021934761	0.96601016
03/08/20	5196	GBIF	PRESERVED_SPECIMEN	US	1322509639	SPECIES	Theobroma	speciosum	0	Theobroma speciosum Willd. ex Spreng.	Valenzuela, L.; et al.	4198	19/10/04	-12.5280556	-69.0830556	1322509639	19/08/20	Rondônia province	30118	0	0	14252	42788	996419	0.82311225	0.885642469	0.188628061	0.027794979	0	0	0.013152734	0.039487734	0.919564553
03/08/20	5229	GBIF	PRESERVED_SPECIMEN	US	1322392165	SPECIES	Theobroma	speciosum	0	Theobroma speciosum Willd. ex Spreng.	Baca, V.P.	7	10/09/90	-12.8333333	-69.2833333	1322392165	17/08/20	Rondônia province	33823	0	0	21078	86842	1061707	0.780918522	0.854355395	0.186272617	0.028105031	0	0	0.017514645	0.072160871	0.882219452
03/08/20	640	GBIF	PRESERVED_SPECIMEN	U	2517441997	SPECIES	Theobroma	guianense	0	Theobroma guianense (Aubl.) J.F.Gmel.	Vigo, J.S.	5677	06/12/72	-8.1892608	-76.5188791	2517441997	19/12/20	Ucayali province	41406	0	0	13022	50177	746529	0.75128128	0.829402506	0.201735917	0.048648039	0	0	0.015299589	0.058953114	0.877099258
03/08/20	642	GBIF	PRESERVED_SPECIMEN	U	2517441968	SPECIES	Herrania	lemniscata	0	Herrania lemniscata (Schomb.) R.E.Schult.	Marcano-Berti, L.	273	28/06/64	7.55452	-63.26947	2517441968	10/11/20	Pacific dominion	361057	0	0	361398	359751	123298	0.286776481	0.257731944	0.210700205	0.299507094	0	0	0.299789963	0.29842373	0.102279213
03/08/20	649	GBIF	PRESERVED_SPECIMEN	U	2517422993	SPECIES	Theobroma	guianense	0	Theobroma guianense (Aubl.) J.F.Gmel.	Villiers, J.F. & Feuillet, C.P.G.A.	2085	08/10/83	3.9780394	-52.5542589	2517422993	19/12/20	Guianan Lowlands province	0	0	0	0	0	0	0	0	0	NA	NA	NA	NA	NA	NA
03/08/20	650	GBIF	PRESERVED_SPECIMEN	U	2517422992	SPECIES	Theobroma	guianense	0	Theobroma guianense (Aubl.) J.F.Gmel.	Schultes, R.E. & Cabrera, I.	15116	31/01/52	0.083333	-70.666667	2517422992	19/12/20	Imerí province	27550	0	0	35642	129313	1013098	0.750529835	0.838250816	0.184576799	0.022851635	0	0	0.029563629	0.107260018	0.840324717
03/08/20	653	GBIF	PRESERVED_SPECIMEN	U	2517418988	SPECIES	Theobroma	guianense	0	Theobroma guianense (Aubl.) J.F.Gmel.	Solomon, J.C.	6286	17/09/81	-11.083333	-65.833333	1095476479	19/12/20	Rondônia province	32834	0	0	15565	85439	1071744	0.780567051	0.85628742	0.196007087	0.027234979	0	0	0.012910777	0.070869505	0.888984739
03/08/20	655	GBIF	PRESERVED_SPECIMEN	U	2517418960	SPECIES	Herrania	nycterodendron	0	Herrania nycterodendron R.E.Schult.	Christenhusz, M.J.M.; et al.	2053	09/08/02	-6.433333	-76.25	2517418960	08/02/22	Ucayali province	107900	0	0	44167	218960	729805	0.609507138	0.70165053	0.242541001	0.098016773	0	0	0.040121472	0.198904102	0.662957654
03/08/20	659	GBIF	PRESERVED_SPECIMEN	U	2517397020	SPECIES	Theobroma	guianense	0	Theobroma guianense (Aubl.) J.F.Gmel.	Prance, G.T.; et al.	16515	29/11/71	-6.716667	-66.783333	1929413014	19/12/20	Madeira province	32642	0	0	31784	106149	1035020	0.772560626	0.859040618	0.189492791	0.027075427	0	0	0.026363746	0.088046981	0.858513846
03/08/20	661	GBIF	PRESERVED_SPECIMEN	U	2517367153	SPECIES	Herrania	lemniscata	0	Herrania lemniscata (Schomb.) R.E.Schult.	Stoffers, A.L.; et al.	303	12/11/82	2.25	-59.166667	2517047342	22/04/21	Guianan Lowlands province	89310	0	0	176182	209116	608029	0.58049119	0.706547618	0.267010169	0.082493024	0	0	0.162734139	0.193154307	0.56161853
03/08/20	664	GBIF	PRESERVED_SPECIMEN	U	2517354204	SPECIES	Theobroma	guianense	0	Theobroma guianense (Aubl.) J.F.Gmel.	Jansen-Jacobs, M.J.; et al.	1499	06/09/89	1.65	-58.633333	1265518253	19/12/20	Roraima province	40489	0	0	28932	82769	1053406	0.770473814	0.846353352	0.187399236	0.033584219	0	0	0.023998089	0.06865401	0.873763682
03/08/20	666	GBIF	PRESERVED_SPECIMEN	U	2517335139	SPECIES	Theobroma	cirmolinae	0	Theobroma cirmolinae Cuatrec.	Cuatrecasas, J.	14897	19/08/43	4.71084	-75.8615	0	21/10/20	Cauca province	5804	0	0	11136	81683	148182	0.617210728	0.649656951	0.179902177	0.023516541	0	0	0.045120642	0.33096169	0.600401126
03/08/20	667	GBIF	PRESERVED_SPECIMEN	U	2517332173	SPECIES	Herrania	mariae	0	Herrania mariae (Mart.) Decne. ex Goudot	Maas, P.J.M. & Westra, L.Y.T.	3902	29/10/79	3.333333	-59.583333	2515476411	27/04/21	Guianan Lowlands province	288938	0	0	403645	254701	258278	0.360785055	0.264723927	0.250376921	0.239670793	0	0	0.334818948	0.21127159	0.21423867
03/08/20	5490	GBIF	PRESERVED_SPECIMEN	US	1321392392	SPECIES	Theobroma	speciosum	0	Theobroma speciosum Willd. ex Spreng.	Maceda, A.	824	03/08/03	-12.5690044	-70.100111	1321392392	12/04/21	Rondônia province	14083	0	0	2866	9780	1178865	0.872079717	0.891252935	0.11648427	0.011681379	0	0	0.002377251	0.008112184	0.977829186
03/08/20	672	GBIF	PRESERVED_SPECIMEN	L	2517231719	SPECIES	Theobroma	simiarum	0	Theobroma simiarum Donn.Sm.	Cuatrecasas, J. & PatiÃ±o, V.M.	27467	22/02/69	3.869426533	-76.52905107	2517231719	22/10/20	Cauca province	0	0	0	0	0	0	0	0	0	NA	NA	NA	NA	NA	NA
03/08/20	674	GBIF	PRESERVED_SPECIMEN	U	2517219953	SPECIES	Theobroma	guianense	0	Theobroma guianense (Aubl.) J.F.Gmel.	Cremers, G.A. & Gautier, S.	12068	08/04/91	4.5	-52.166667	1321118745	19/12/20	Guianan Lowlands province	655830	0	0	23376	67690	458675	0.240363013	-0.038932148	0.486210968	0.543999482	0	0	0.019389982	0.056147668	0.380462868
03/08/20	5986	GBIF	PRESERVED_SPECIMEN	US	1319619848	SPECIES	Theobroma	speciosum	0	Theobroma speciosum Willd. ex Spreng.	Schunke, J.V.	1631	16/02/67	-10.0504849	-75.8889608	1319619848	19/08/20	South American Atlantic coast	73961	0	0	24591	173766	932886	0.711991247	0.818181813	0.226775535	0.061368034	0	0	0.020404015	0.144179741	0.774048211
03/08/20	678	GBIF	PRESERVED_SPECIMEN	U	2517216022	SPECIES	Theobroma	guianense	0	Theobroma guianense (Aubl.) J.F.Gmel.	Santos, M.R.	473	05/12/78	-1.5239527	-52.5785713	2517216022	19/12/20	Roraima province	98997	0	0	3779	96626	700899	0.657572467	0.829561532	0.386301081	0.109959891	0	0	0.004197485	0.107326328	0.778516296
03/08/20	680	GBIF	PRESERVED_SPECIMEN	U	2517215997	SPECIES	Herrania	mariae	0	Herrania mariae (Mart.) Decne. ex Goudot	Krukoff, B.A.	6085	14/9-11/10/1934	-6.987642	-62.683954	2517215997	03/05/21	Madeira province	40381	0	0	4172	28957	1132007	0.795161471	0.851083875	0.194480831	0.033496832	0	0	0.003460756	0.0240204	0.939022013
03/08/20	681	GBIF	PRESERVED_SPECIMEN	U	2517215996	SPECIES	Herrania	kanukuensis	0	Herrania kanukuensis R.E.Schult.	Oldeman, R.A.A.	T526	18/04/70	2.6565592	-52.649566	2517215996	27/04/21	Guianan Lowlands province	54222	0	0	34324	85245	1031802	0.762061561	0.853843927	0.207064696	0.044975377	0	0	0.028470636	0.070707942	0.855846044
03/08/20	684	GBIF	PRESERVED_SPECIMEN	U	2517205175	SPECIES	Theobroma	obovatum	0	Theobroma obovatum Klotzsch ex Bernoulli	Krukoff, B.A.	6263	14/09/34	-6.987642	-62.683954	1265517967	22/09/20	Madeira province	40381	0	0	4172	28957	1132007	0.795161471	0.851083875	0.194480831	0.033496832	0	0	0.003460756	0.0240204	0.939022013
03/08/20	687	GBIF	PRESERVED_SPECIMEN	U	2517205093	SPECIES	Herrania	kanukuensis	0	Herrania kanukuensis R.E.Schult.	Lindeman, J.C.	5136	02/12/53	5.8	-54.666667	2517205093	27/04/21	Guianan Lowlands province	451021	0	0	16396	60224	654207	0.362025371	0.727558285	0.5670536	0.381623525	0	0	0.013873188	0.050957484	0.553545803
03/08/20	689	GBIF	PRESERVED_SPECIMEN	U	2517204005	SPECIES	Theobroma	guianense	0	Theobroma guianense (Aubl.) J.F.Gmel.	Clarke, H.D.; et al.	7899	25/08/99	1.64917	-59.2497	1456148434	19/12/20	Roraima province	52577	0	0	24554	74032	686399	0.725821858	0.829541206	0.224276104	0.06277386	0	0	0.029316039	0.088389874	0.819520227
03/08/20	692	GBIF	PRESERVED_SPECIMEN	U	2517203973	SPECIES	Herrania	camargoana	0	Herrania camargoana R.E.Schult.	Maas, P.J.M.	4755	06/10/80	-1.450542813	-78.37750901	2517203973	08/02/22	Paramo province	83790	0	0	46069	352930	722730	0.604536055	0.654397309	0.224720759	0.069505333	0	0	0.038215076	0.292761873	0.599517718
03/08/20	697	GBIF	PRESERVED_SPECIMEN	L	2517189846	SPECIES	Theobroma	guianense	Theobroma subincana	Theobroma guianense (Aubl.) J.F.Gmel.	Brandbyge, J. & Asanza, C.E.	30344	26/03/80	-0.466667	-76.816667	2517189846	21/12/20	Napo province	11234	0	0	4427	25371	592418	0.793892315	0.848279476	0.153993407	0.017734628	0	0	0.006988713	0.040052096	0.935224564
03/08/20	6016	GBIF	PRESERVED_SPECIMEN	US	1319539413	SPECIES	Theobroma	speciosum	0	Theobroma speciosum Willd. ex Spreng.	Young, K. & Salazar, A.	1028	22/06/81	-8.78333	-75.13333	1319539413	19/08/20	Ucayali province	34738	0	0	9009	58250	1103587	0.774793242	0.829476237	0.171262973	0.028814251	0	0	0.007472727	0.048316832	0.91539619
03/08/20	701	GBIF	PRESERVED_SPECIMEN	U	2517185969	SPECIES	Theobroma	guianense	0	Theobroma guianense (Aubl.) J.F.Gmel.	Clarke, H.D.	3612	17/02/97	2.9833333	-58.5833333	1456090258	21/12/20	Guianan Lowlands province	12560	0	0	10263	27066	1125194	0.821456305	0.845209479	0.116625207	0.010688607	0	0	0.008733851	0.023033267	0.957544276
03/08/20	702	GBIF	PRESERVED_SPECIMEN	U	2517185968	SPECIES	Theobroma	guianense	0	Theobroma guianense (Aubl.) J.F.Gmel.	Ek, R.C.; et al.	1354	13/02/99	4.589278	-52.279972	0	21/12/20	Guianan Lowlands province	655830	0	0	23376	67690	458675	0.240363013	-0.038932148	0.486210968	0.543999482	0	0	0.019389982	0.056147668	0.380462868
03/08/20	705	GBIF	PRESERVED_SPECIMEN	U	2517178985	SPECIES	Theobroma	guianense	0	Theobroma guianense (Aubl.) J.F.Gmel.	Irwin, H.S.; et al.	55196	22/08/63	3.333333	-56.816667	1424167179	21/12/20	Guianan Lowlands province	230	0	0	331	1618	1097232	0.879442141	0.882352948	0.029143565	0.000209203	0	0	0.00030107	0.001471697	0.99801803
03/08/20	6256	GBIF	PRESERVED_SPECIMEN	US	1318704770	SPECIES	Theobroma	velutinum	0	Theobroma velutinum Benoist	Rabelo, B.V.; et al.	2435	04/10/83	-0.833333	-51.75	1928104024	10/08/20	Roraima province	0	0	0	0	0	0	0	0	0	NA	NA	NA	NA	NA	NA
03/08/20	708	GBIF	PRESERVED_SPECIMEN	L	2517177793	SPECIES	Herrania	nitida	0	Herrania nitida (Poepp.) R.E.Schult.	Holm-Nielsen, L.B.; et al.	22059	19/03/80	-1.35	-76.933333	2517177793	26/04/21	Napo province	5340	0	0	5693	20503	839685	0.827936445	0.851782382	0.101999246	0.006129329	0	0	0.006534507	0.023533638	0.963802525
03/08/20	714	GBIF	PRESERVED_SPECIMEN	U	2517173300	SPECIES	Theobroma	obovatum	0	Theobroma obovatum Klotzsch ex Bernoulli	Krukoff, B.A.	8275	11/09/36	-4.696879	-69.504833	1929191258	22/09/20	Madeira province	20667	0	0	38505	151810	994622	0.761798706	0.861736357	0.193514951	0.017142445	0	0	0.031938348	0.125920286	0.824998922
03/08/20	14692	GBIF	PRESERVED_SPECIMEN	COAH	768750290	SPECIES	Theobroma	glaucum	0	Theobroma glaucum H.Karst.	CÃ¡rdenas, D.; et al.	11880	09/12/99	0.86	-76.75	768750290	07/09/20	Napo province	53445	0	0	20014	69430	1062692	0.748130095	0.827962875	0.199050166	0.044331322	0	0	0.016601124	0.05759049	0.881477064
03/08/20	720	GBIF	PRESERVED_SPECIMEN	U	2517167985	SPECIES	Theobroma	guianense	0	Theobroma guianense (Aubl.) J.F.Gmel.	Clarke, H.D.; et al.	6293	15/09/97	3.166667	-58.816667	1456480357	21/12/20	Guianan Lowlands province	16683	0	0	29566	296930	861825	0.70152754	0.819957256	0.20440978	0.013844767	0	0	0.024536018	0.24641412	0.715205095
03/08/20	722	GBIF	PRESERVED_SPECIMEN	U	2517167983	SPECIES	Theobroma	guianense	Theobroma guianense	Theobroma guianense (Aubl.) J.F.Gmel.	Idrobo, J.M. & Schultes, R.E.	776	20-28/12/1950	2.1831929	-73.7843783	2517167983	21/12/20	Imerí province	5083	0	0	2299	92074	1070090	0.770035819	0.813222647	0.109432699	0.004346131	0	0	0.00196572	0.078726275	0.914961874
03/08/20	729	GBIF	PRESERVED_SPECIMEN	U	2517047367	SPECIES	Theobroma	guianense	0	Theobroma guianense (Aubl.) J.F.Gmel.	Prance, G.T.; et al.	11127	19/03/71	2.4342411	-60.918932	2517047367	21/12/20	Pantepui province	26562	0	0	46862	217529	914643	0.701832506	0.811019361	0.216214222	0.022032256	0	0	0.038870401	0.180432749	0.758664594
03/08/20	731	GBIF	PRESERVED_SPECIMEN	U	2517045282	SPECIES	Theobroma	guianense	0	Theobroma guianense (Aubl.) J.F.Gmel.	Clarke, H.D.; et al.	7944	26/08/99	1.611667	-59.240556	2517045282	21/12/20	Roraima province	52577	0	0	24554	74032	686399	0.725821858	0.829541206	0.224276104	0.06277386	0	0	0.029316039	0.088389874	0.819520227
03/08/20	736	GBIF	PRESERVED_SPECIMEN	U	2517031442	SPECIES	Theobroma	microcarpum	0	Theobroma microcarpum Mart.	Krukoff, B.A.	1644	21/12/31	0	0	1930242290	14/09/20	0	0	0	0	0	0	0	0	0	0	NA	NA	NA	NA	NA	NA
03/08/20	6092	GBIF	PRESERVED_SPECIMEN	US	1319263763	SPECIES	Theobroma	speciosum	Theobroma quinquenervia Benoist	Theobroma speciosum Willd. ex Spreng.	Williams, L.	3346	/9/1929	-7.2785279	-77.1697852	1322514141	12/04/21	South American Atlantic coast	27182	0	0	11273	79970	1087168	0.805681018	0.865106702	0.165026641	0.022546581	0	0	0.009350585	0.066332502	0.901770332
03/08/20	739	GBIF	PRESERVED_SPECIMEN	U	2517031362	VARIETY	Herrania	nitida	0	Herrania nitida (Poepp.) R.E.Schult. var. aspera (Karst. Ex Triana) R.E.Schult.	Krukoff, B.A.	4523	21/05/33	-3.3575519	-64.7128836	1931077223	26/04/21	Imerí province	95010	0	0	15629	47113	1047731	0.733660523	0.836932003	0.274162397	0.078814882	0	0	0.012964928	0.03908226	0.869137931
03/08/20	746	GBIF	PRESERVED_SPECIMEN	US	2517012346	SPECIES	Theobroma	guianense	0	Theobroma guianense (Aubl.) J.F.Gmel.	Bordenave, B.G. & Raes, N.	5295	27/01/00	-4.5688889	-54.2838889	2517012346	21/12/20	Xingu-Tapajós province	2212	0	0	538	16651	1186198	0.834910143	0.855934858	0.07622746	0.001834773	0	0	0.000446251	0.013811392	0.983907585
03/08/20	754	GBIF	PRESERVED_SPECIMEN	L	2516971788	SPECIES	Theobroma	guianense	0	Theobroma guianense (Aubl.) J.F.Gmel.	Andel, T.R.; et al.	204	31/08/89	1.0558059	-76.5524355	2516971788	21/12/20	Napo province	0	0	0	0	0	0	0	0	0	NA	NA	NA	NA	NA	NA
03/08/20	755	GBIF	PRESERVED_SPECIMEN	L	2516970857	SPECIES	Herrania	kanukuensis	0	Herrania kanukuensis R.E.Schult.	Hoffman, B.	6383	03/09/05	2.355556	-56.772222	2516952810	27/04/21	Guianan Lowlands province	581	0	0	803	3720	851939	0.87410856	0.878663957	0.04423653	0.000677912	0	0	0.000936942	0.004340506	0.99404464
03/08/20	6321	GBIF	PRESERVED_SPECIMEN	US	1318469536	SPECIES	Theobroma	speciosum	0	Theobroma speciosum Willd. ex Spreng.	Graham, J.G.	2574	02/08/03	-7.9444	-73.8936	1318469536	20/08/20	Rondônia province	6	0	0	38	412	627967	0.865406182	0.866813004	0.017726574	9.55E-06	0	0	6.05E-05	0.000655609	0.999274374
03/08/20	13121	GBIF	PRESERVED_SPECIMEN	HUA	1123882190	SPECIES	Theobroma	glaucum	0	Theobroma glaucum H.Karst.	Roldan, F.; et al.	2820	09/12/97	6.67366	-74.43385	1123882190	07/09/20	Magdalena province	81176	0	0	55410	328746	740243	0.614404386	0.664611578	0.224985237	0.067333845	0	0	0.045961471	0.272688136	0.614016548
03/08/20	854	GBIF	PRESERVED_SPECIMEN	U	2515575630	SPECIES	Theobroma	glaucum	0	Theobroma glaucum H.Karst.	Maas, P.J.M.; et al.	1763	18/09/74	9.27277	-78.92916	2515575630	08/09/20	Pacific dominion	0	0	0	0	0	0	0	0	0	NA	NA	NA	NA	NA	NA
03/08/20	4219	GBIF	PRESERVED_SPECIMEN	FMB	1707489914	SPECIES	Herrania	albiflora	0	Herrania albiflora Goudot	Mijares, F.; et al.	716	14/03/13	6.820344	-71.052972	1707489914	09/11/20	Pacific dominion	81006	0	0	43530	342365	738687	0.608742756	0.653395772	0.211940571	0.067192109	0	0	0.036106862	0.283981758	0.612719271
03/08/20	796	GBIF	PRESERVED_SPECIMEN	WAG	2516196283	SPECIES	Herrania	cuatrecasana	0	Herrania cuatrecasana GarcÃ­a-Barr.	Poole, H.A.C.	44	01/01/66	9.9067054	-83.6800512	2516188151	16/12/20	Puntarenas-Chiriquí province	350250	0	0	33738	101317	719380	0.488029121	0.739880562	0.463435559	0.290739903	0	0	0.028005661	0.084102483	0.597151953
03/08/20	802	GBIF	PRESERVED_SPECIMEN	L	2516175522	SPECIES	Herrania	balaensis	0	Herrania balaensis Preuss	Eggers, H.F.A.	14362	1/4/1892	0	0	2516175522	05/05/21	0	0	0	0	0	0	0	0	0	0	NA	NA	NA	NA	NA	NA
03/08/20	4216	GBIF	PRESERVED_SPECIMEN	FMB	1707495370	SPECIES	Herrania	albiflora	0	Herrania albiflora Goudot	Mijares, F.	333	08/11/12	6.276389	-71.716667	1707495370	09/11/20	Pacific dominion	99246	0	0	41613	364350	700314	0.582922446	0.639297009	0.224224875	0.082326094	0	0	0.034518628	0.302233968	0.58092131
03/08/20	813	GBIF	PRESERVED_SPECIMEN	U	2515795521	SPECIES	Theobroma	cirmolinae	0	Theobroma cirmolinae Cuatrec.	Sanchez, D.	1507	19/07/87	6.7729999	-76.1313454	2515339826	09/04/21	Cauca province	0	0	0	0	0	0	0	0	0	NA	NA	NA	NA	NA	NA
03/08/20	814	GBIF	PRESERVED_SPECIMEN	U	2515794388	SPECIES	Herrania	pulcherrima	Herrania pacifica	Herrania pacifica Cuatrec.	Cuatrecasas, J.	16010	05/02/44	0	0	2515794388	14/12/20	0	0	0	0	0	0	0	0	0	0	NA	NA	NA	NA	NA	NA
03/08/20	815	GBIF	PRESERVED_SPECIMEN	U	2515787601	SPECIES	Theobroma	guianense	0	Theobroma guianense (Aubl.) J.F.Gmel.	Jansen-Jacobs, M.J.; et al.	5940	16/09/99	3.133333	-58.533333	2515418813	21/12/20	Guianan Lowlands province	12560	0	0	10263	27066	1125194	0.821456305	0.845209479	0.116625207	0.010688607	0	0	0.008733851	0.023033267	0.957544276
03/08/20	817	GBIF	PRESERVED_SPECIMEN	U	2515775534	SPECIES	Theobroma	cirmolinae	0	Theobroma cirmolinae Cuatrec.	Cuatrecasas, J.	15700	20/12/43	3.8811	-72.8667	1228550159	21/10/20	Pacific dominion	22458	0	0	39644	598942	544545	0.577898964	0.577643156	0.170524054	0.018628239	0	0	0.032883512	0.496804467	0.451683783
03/08/20	820	GBIF	PRESERVED_SPECIMEN	U	2515748335	SPECIES	Theobroma	microcarpum	Theobroma obovatum	Theobroma microcarpum Mart.	Krukoff, B.A.	6592	12/10/34	-7.52	-63.03	1928134394	14/09/20	Madeira province	40646	0	0	17328	90765	860067	0.736639093	0.822811872	0.218325676	0.040291196	0	0	0.017176742	0.0899727	0.852559362
03/08/20	822	GBIF	PRESERVED_SPECIMEN	U	2515738384	SPECIES	Theobroma	glaucum	Theobroma capilliferum	Theobroma glaucum H.Karst.	Cuatrecasas, J.	16160	10/02/44	3.45126	-77.2046	2515738384	11/11/20	Pacific dominion	0	0	0	0	0	0	0	0	0	NA	NA	NA	NA	NA	NA
03/08/20	11080	GBIF	PRESERVED_SPECIMEN	MO	1259184163	SPECIES	Theobroma	speciosum	0	Theobroma speciosum Willd. ex Spreng.	Gentry, A.H.	43435	08/08/83	-11.86666	-71.36666	1228398180	21/08/20	Rondônia province	9563	0	0	2172	7592	1186261	0.858682096	0.87120074	0.091802938	0.007932229	0	0	0.001801611	0.006297342	0.983968819
03/08/20	11138	GBIF	PRESERVED_SPECIMEN	MO	1259179514	SPECIES	Theobroma	speciosum	0	Theobroma speciosum Willd. ex Spreng.	Vasquez, R. & Al., E.	18355	15/10/93	-4.1666667	-73.5	1228488562	31/08/20	Napo province	72433	0	0	27264	104842	1001049	0.705524528	0.806079984	0.23019889	0.060081056	0	0	0.022614691	0.086963374	0.830340879
03/08/20	833	GBIF	PRESERVED_SPECIMEN	U	2515610178	SPECIES	Theobroma	simiarum	0	Theobroma simiarum Donn.Sm.	Teunissen, P.A.	16785	23/11/81	5.8483074	-55.2038278	2515610178	22/10/20	Guianan Lowlands province	248705	0	0	8144	43370	419688	0.395105703	0.75106889	0.560878417	0.345468234	0	0	0.011312572	0.060243893	0.582975301
03/08/20	835	GBIF	PRESERVED_SPECIMEN	U	2515610155	SPECIES	Herrania	nitida	0	Herrania nitida (Poepp.) R.E.Schult.	Acevedo-RodrÃ­guez, P.; et al.	8842	16/01/97	-11.7856	-72.6992	1321653425	26/04/21	Rondônia province	77199	0	0	29526	67537	1028907	0.77605534	0.878363431	0.235993935	0.064163056	0	0	0.024540193	0.056132597	0.855164154
03/08/20	843	GBIF	PRESERVED_SPECIMEN	U	2515595817	SPECIES	Theobroma	obovatum	0	Theobroma obovatum Klotzsch ex Bernoulli	Bisby, F.A.; et al.	18104	26/09/73	-1.732384	-60.154138	1320118637	23/09/20	Roraima province	124061	0	0	40085	137125	552814	0.606223658	0.791881442	0.305774607	0.145256034	0	0	0.046933268	0.160551936	0.647258762
03/08/20	844	GBIF	PRESERVED_SPECIMEN	U	2515595750	SPECIES	Theobroma	guianense	0	Theobroma guianense (Aubl.) J.F.Gmel.	Prance, G.T.; et al.	12199	21/04/71	-7.4989289	-73.7305394	2515595750	21/12/20	Rondônia province	17172	0	0	8391	38487	780481	0.77832112	0.822305083	0.141565419	0.020333179	0	0	0.009935692	0.045572039	0.924159089
03/08/20	847	GBIF	PRESERVED_SPECIMEN	U	2515595724	SPECIES	Herrania	breviligulata	0	Herrania breviligulata R.E.Schult.	Schultes, R.E. & Cabrera, I.	18720	16/03/53	1.15234	-76.66856	2515595724	11/11/20	Paramo province	17583	0	0	4968	11402	172048	0.72529716	0.831390142	0.241516007	0.085353955	0	0	0.024116388	0.055349246	0.835180412
03/08/20	11242	GBIF	PRESERVED_SPECIMEN	MO	1259174086	SPECIES	Theobroma	speciosum	0	Theobroma speciosum Willd. ex Spreng.	Gentry, A.H.; et al.	42881	12/07/83	-3.46666	-72.83333	1228225405	21/08/20	Imerí province	22943	0	0	975	5074	664740	0.800708203	0.84028393	0.184667222	0.033071849	0	0	0.001405442	0.007314064	0.958208645
03/08/20	849	GBIF	PRESERVED_SPECIMEN	U	2515591805	SPECIES	Theobroma	guianense	0	Theobroma guianense (Aubl.) J.F.Gmel.	Ãllgaard, B.; et al.	39000	01/01/82	-0.516667	-76.383333	2515591805	21/12/20	Napo province	23147	0	0	6179	27192	1149029	0.816607505	0.854238331	0.146636219	0.019200413	0	0	0.005125474	0.022555736	0.953118377
03/08/20	851	GBIF	PRESERVED_SPECIMEN	U	2515591201	SPECIES	Herrania	lemniscata	0	Herrania lemniscata (Schomb.) R.E.Schult.	Mori, S.A.; et al.	24562	24/03/97	4.3333333	-58.8	2515555331	10/11/20	Guianan Lowlands province	49626	0	0	36003	275300	844648	0.688283014	0.813852787	0.222613065	0.041163692	0	0	0.029863708	0.228355385	0.700617215
03/08/20	852	GBIF	PRESERVED_SPECIMEN	U	2515587815	SPECIES	Theobroma	microcarpum	0	Theobroma microcarpum Mart.	Ducke, A.	s.n.	04/02/26	-1.2407437	-48.459403	1322632960	14/09/20	Pará province	340265	0	0	27035	185859	652409	0.410442507	0.658553213	0.55760358	0.282244552	0	0	0.022425114	0.154167164	0.54116317
03/08/20	5469	GBIF	PRESERVED_SPECIMEN	US	1321473410	SPECIES	Theobroma	glaucum	0	Theobroma glaucum H.Karst.	Baker, R.E.D. & Cope, F.W.	T11	08/09/52	0	0	1319016576	09/04/21	0	0	0	0	0	0	0	0	0	0	NA	NA	NA	NA	NA	NA
03/08/20	855	GBIF	PRESERVED_SPECIMEN	U	2515574627	SPECIES	Theobroma	obovatum	0	Theobroma obovatum Klotzsch ex Bernoulli	Prance, G.T.; et al.	2449	20/09/66	-8.833843	-67.312245	1928191223	12/04/21	Madeira province	10563	0	0	1387	15258	1178388	0.845348066	0.867755711	0.111152511	0.008761642	0	0	0.001150468	0.012655981	0.977431909
03/08/20	857	GBIF	PRESERVED_SPECIMEN	U	2515574561	SPECIES	Theobroma	guianense	0	Theobroma guianense (Aubl.) J.F.Gmel.	Foster, R.B.	3758	17/09/77	-1.0066459	-77.811375	2515574561	21/12/20	Napo province	0	0	0	0	0	0	0	0	0	NA	NA	NA	NA	NA	NA
03/08/20	6078	GBIF	PRESERVED_SPECIMEN	US	1319313703	SPECIES	Theobroma	velutinum	0	Theobroma velutinum Benoist	Mori, S.A.; et al.	18204	31/05/86	3.6167	-53.2	1319313703	10/08/20	Guianan Lowlands province	34723	0	0	27180	66151	922526	0.795097778	0.874870181	0.194142331	0.033051267	0	0	0.025871423	0.062966171	0.878111139
03/08/20	862	GBIF	PRESERVED_SPECIMEN	U	2515572185	SPECIES	Theobroma	sylvestre	0	Theobroma sylvestre Mart.	Steward, W.C. & Ramos, J.F.	20107	26/12/73	-3.075656	-59.955906	1930860197	25/08/20	Roraima province	139821	0	0	14251	68494	857415	0.646253137	0.841756701	0.410128487	0.129466167	0	0	0.013195603	0.063421486	0.793916745
03/08/20	11678	GBIF	PRESERVED_SPECIMEN	MO	1258382189	SPECIES	Theobroma	speciosum	0	Theobroma speciosum Willd. ex Spreng.	Gentry, A.H. & Al., E.	26917	19/10/79	-12	-71.72	1228462362	21/08/20	Rondônia province	9563	0	0	2172	7592	1186261	0.858682096	0.87120074	0.091802938	0.007932229	0	0	0.001801611	0.006297342	0.983968819
03/08/20	872	GBIF	PRESERVED_SPECIMEN	U	2515543645	SPECIES	Theobroma	guianense	0	Theobroma guianense (Aubl.) J.F.Gmel.	Irwin, H.S.; et al.	54893	19/08/63	3.641667	-56.533333	1424167275	23/12/20	Guianan Lowlands province	297	0	0	207	1147	1197434	0.883993912	0.886754274	0.027556293	0.000247689	0	0	0.000172632	0.000956563	0.998623117
03/08/20	873	GBIF	PRESERVED_SPECIMEN	U	2515543644	SPECIES	Theobroma	guianense	0	Theobroma guianense (Aubl.) J.F.Gmel.	Larpin, D.	908	01/04/90	4.5	-52.7	1319092621	23/12/20	Guianan Lowlands province	655830	0	0	23376	67690	458675	0.240363013	-0.038932148	0.486210968	0.543999482	0	0	0.019389982	0.056147668	0.380462868
03/08/20	11679	GBIF	PRESERVED_SPECIMEN	MO	1258382111	SPECIES	Theobroma	speciosum	0	Theobroma speciosum Willd. ex Spreng.	Gentry, A.H. & Al., E.	36339	13/03/82	-8.75	-75.03333	1228350742	21/08/20	Ucayali province	34738	0	0	9009	58250	1103587	0.774793242	0.829476237	0.171262973	0.028814251	0	0	0.007472727	0.048316832	0.91539619
03/08/20	877	GBIF	PRESERVED_SPECIMEN	U	2515542329	SPECIES	Theobroma	guianense	0	Theobroma guianense (Aubl.) J.F.Gmel.	Bisby, F.A.; et al.	P18061	24/09/73	-1.732384	-60.154138	2515542329	23/12/20	Roraima province	124061	0	0	40085	137125	552814	0.606223658	0.791881442	0.305774607	0.145256034	0	0	0.046933268	0.160551936	0.647258762
03/08/20	879	GBIF	PRESERVED_SPECIMEN	U	2515542303	SPECIES	Herrania	mariae	0	Herrania mariae (Mart.) Decne. ex Goudot	Berg, C.C.; et al.	738	29/10/77	-3.271835	-52.397876	1929340223	04/05/21	Xingu-Tapajós province	65347	0	0	5757	176970	773917	0.688004111	0.791157126	0.288686112	0.063940876	0	0	0.005633122	0.173161995	0.757264007
03/08/20	880	GBIF	PRESERVED_SPECIMEN	U	2515542302	SPECIES	Herrania	kanukuensis	0	Herrania kanukuensis R.E.Schult.	Oldeman, R.A.A.	723	15/03/70	2.75	-55	2515542302	27/04/21	Guianan Lowlands province	46640	0	0	25969	66971	1066010	0.781637983	0.85538882	0.192849939	0.038686452	0	0	0.021540491	0.055550394	0.884222663
03/08/20	3234	GBIF	PRESERVED_SPECIMEN	NY	1928357239	SPECIES	Theobroma	guianense	0	Theobroma guianense (Aubl.) J.F.Gmel.	Mendoza, P.; et al.	123	14/03/92	-1.2189	-77.3839	1322860699	24/03/21	Napo province	90900	0	0	27340	80213	1006289	0.715861168	0.815963745	0.227841836	0.075451839	0	0	0.022693656	0.066581061	0.835273444
03/08/20	884	GBIF	PRESERVED_SPECIMEN	U	2515540097	SPECIES	Theobroma	guianense	0	Theobroma guianense (Aubl.) J.F.Gmel.	Clarke, H.D.; et al.	7653	09/09/98	1.386389	-58.946389	2515540097	05/01/21	Roraima province	11601	0	0	9460	24408	555908	0.793598664	0.837019086	0.147858337	0.019290728	0	0	0.015730565	0.040586853	0.924391854
03/08/20	885	GBIF	PRESERVED_SPECIMEN	U	2515538106	SPECIES	Theobroma	microcarpum	0	Theobroma microcarpum Mart.	Krukoff, B.A.	8280	11/09/36	-4.696879	-69.504833	1929684978	14/09/20	Madeira province	20667	0	0	38505	151810	994622	0.761798706	0.861736357	0.193514951	0.017142445	0	0	0.031938348	0.125920286	0.824998922
03/08/20	889	GBIF	PRESERVED_SPECIMEN	U	2515538044	SPECIES	Theobroma	simiarum	0	Theobroma simiarum Donn.Sm.	Lindeman, J.C.	5725	08/04/54	0	0	2515538044	22/10/20	0	0	0	0	0	0	0	0	0	0	NA	NA	NA	NA	NA	NA
03/08/20	12444	GBIF	PRESERVED_SPECIMEN	F	1228530364	SPECIES	Theobroma	speciosum	0	Theobroma speciosum Willd. ex Spreng.	Grandez, C.; et al.	2602	10/05/91	-4.133333	-72.916667	1228530364	12/04/21	Madeira province	114	0	0	230	2781	938845	0.843761498	0.846679091	0.028120796	0.000121023	0	0	0.000244169	0.002952323	0.996682485
03/08/20	891	GBIF	PRESERVED_SPECIMEN	U	2515533569	SPECIES	Theobroma	sylvestre	0	Theobroma sylvestre Mart.	AssunÃ§Ã£o, P.A.C.L.; et al.	720	14/11/97	-2.8833333	-59.9666667	1929580275	26/08/20	Roraima province	162096	0	0	27965	95764	796175	0.615719998	0.799432695	0.378651822	0.14981146	0	0	0.025845656	0.08850647	0.735836414
03/08/20	892	GBIF	PRESERVED_SPECIMEN	U	2515522624	SPECIES	Herrania	mariae	0	Herrania mariae (Mart.) Decne. ex Goudot	Williams, L.	11339	//	0	0	0	13/05/21	0	0	0	0	0	0	0	0	0	0	NA	NA	NA	NA	NA	NA
03/08/20	894	GBIF	PRESERVED_SPECIMEN	U	2515518115	SPECIES	Theobroma	guianense	0	Theobroma guianense (Aubl.) J.F.Gmel.	Clarke, H.D. & McPherson, T.	2013	06/06/96	3.333333	-59.25	1320654972	05/01/21	Guianan Lowlands province	16683	0	0	29566	296930	861825	0.70152754	0.819957256	0.20440978	0.013844767	0	0	0.024536018	0.24641412	0.715205095
03/08/20	895	GBIF	PRESERVED_SPECIMEN	U	2515518114	SPECIES	Theobroma	guianense	0	Theobroma guianense (Aubl.) J.F.Gmel.	Santos, M.R.	56	18/02/77	-1.43	-61.58	2515518114	05/01/21	Imerí province	104625	0	0	18791	67598	1014250	0.724652705	0.841400623	0.273864144	0.086806708	0	0	0.015590775	0.056085638	0.841516879
03/08/20	906	GBIF	PRESERVED_SPECIMEN	U	2515464098	SPECIES	Theobroma	sylvestre	0	Theobroma sylvestre Mart.	Prance, G.T.; et al.	24252	24/11/76	-1.169877	-60.439138	1928107524	03/09/20	Roraima province	21138	0	0	22757	110648	1051022	0.755575255	0.820643008	0.163259084	0.017533688	0	0	0.018876626	0.091781032	0.871808654
03/08/20	907	GBIF	PRESERVED_SPECIMEN	U	2515464097	SPECIES	Theobroma	obovatum	0	Theobroma obovatum Klotzsch ex Bernoulli	Clarke, H.D.; et al.	8215	04/09/99	1.565	-59.2383333	1456272560	23/09/20	Roraima province	52577	0	0	24554	74032	686399	0.725821858	0.829541206	0.224276104	0.06277386	0	0	0.029316039	0.088389874	0.819520227
03/08/20	909	GBIF	PRESERVED_SPECIMEN	U	2515464032	SPECIES	Theobroma	guianense	0	Theobroma guianense (Aubl.) J.F.Gmel.	Prance, G.T.; et al.	6793	05/08/68	-9.694976	-65.3566402	2515464032	16/03/21	Madeira province	81736	0	0	51284	155337	917231	0.697351158	0.822760671	0.246709973	0.067797622	0	0	0.042538579	0.1288475	0.760816299
03/08/20	2947	GBIF	PRESERVED_SPECIMEN	NY	1930113855	SPECIES	Herrania	lemniscata	0	Herrania lemniscata (Schomb.) R.E.Schult.	Prance, G.T.; et al.	10661	22/02/71	3.375	-63.225	1042602012	09/12/21	Pantepui province	0	0	0	0	0	0	0	0	0	NA	NA	NA	NA	NA	NA
03/08/20	4741	GBIF	PRESERVED_SPECIMEN	F	1424762779	SPECIES	Theobroma	velutinum	0	Theobroma velutinum Benoist	Pires, J.M.; et al.	51263	28/09/61	1.1833333	-52.1333333	1322865358	31/08/20	Roraima province	54616	0	0	38762	100867	1011350	0.764858366	0.868604302	0.216908861	0.045302112	0	0	0.032151759	0.083665742	0.838880387
03/08/20	2720	GBIF	PRESERVED_SPECIMEN	COAH	1932878078	SPECIES	Theobroma	glaucum	0	Theobroma glaucum H.Karst.	Mendoza, H.; et al.	5529	07/09/98	0.501944	-77.230278	1932878078	04/09/20	Paramo province	0	0	0	0	0	0	0	0	0	NA	NA	NA	NA	NA	NA
03/08/20	921	GBIF	PRESERVED_SPECIMEN	U	2515429419	SPECIES	Herrania	purpurea	0	Herrania purpurea (Pittier) R.E.Schult.	Maas, P.J.M.; et al.	7920	14/02/91	9.633333	-82.833333	2515429419	07/12/20	Pacific dominion	170631	0	0	39766	160054	835093	0.642435522	0.812109888	0.304970513	0.141538592	0	0	0.032985938	0.132764959	0.692710511
03/08/20	930	GBIF	PRESERVED_SPECIMEN	U	2515416557	SPECIES	Herrania	cuatrecasana	0	Herrania cuatrecasana GarcÃ­a-Barr.	Schultes, R.E. & Cabrera, I.	19100	16/03/53	1.1477941	-76.6481284	2515416557	16/12/20	Napo province	0	0	0	0	0	0	0	0	0	NA	NA	NA	NA	NA	NA
03/08/20	934	GBIF	PRESERVED_SPECIMEN	U	2515404874	SPECIES	Theobroma	guianense	0	Theobroma guianense (Aubl.) J.F.Gmel.	Prance, G.T.; et al.	24581	25/02/77	-3.382738	-68.359883	2515404874	05/01/21	Imerí province	51401	0	0	4176	23053	1126964	0.767605949	0.828045011	0.234279852	0.042635415	0	0	0.003463853	0.019121694	0.934779038
03/08/20	935	GBIF	PRESERVED_SPECIMEN	U	2515403497	SPECIES	Theobroma	gileri	0	Theobroma gileri Cuatrec.	Schultes, R.E. & Cabrera, I.	18695	16/02/53	7.33	-76.43	1319042828	09/04/21	Cauca province	0	0	0	0	0	0	0	0	0	NA	NA	NA	NA	NA	NA
03/08/20	939	GBIF	PRESERVED_SPECIMEN	U	2515390423	SPECIES	Herrania	nitida	0	Herrania nitida (Poepp.) R.E.Schult.	Prance, G.T.; et al.	8115	31/10/68	-7.265097	-64.798211	1265518008	05/05/21	Madeira province	25634	0	0	9152	41646	1129148	0.811733233	0.862559259	0.183258002	0.021262795	0	0	0.007591367	0.034544369	0.93660147
03/08/20	12532	GBIF	PRESERVED_SPECIMEN	F	1228454687	SPECIES	Theobroma	speciosum	0	Theobroma speciosum Willd. ex Spreng.	Shepard, G.	2131	/7/1988	-11.3666667	-71.9666667	1228454687	13/04/21	Rondônia province	1943	0	0	546	2343	1035724	0.857015177	0.860945821	0.050507896	0.001867271	0	0	0.000524719	0.002251681	0.995356329
03/08/20	958	GBIF	PRESERVED_SPECIMEN	L	2515279328	SPECIES	Herrania	kanukuensis	0	Herrania kanukuensis R.E.Schult.	Hoffman, B.	6350	10/07/05	2.3366111	-56.7913889	2515279328	27/04/21	Guianan Lowlands province	581	0	0	803	3720	851939	0.87410856	0.878663957	0.04423653	0.000677912	0	0	0.000936942	0.004340506	0.99404464
03/08/20	959	GBIF	PRESERVED_SPECIMEN	L	2515270898	SPECIES	Theobroma	obovatum	0	Theobroma obovatum Klotzsch ex Bernoulli	Chatrou, L.W.; et al.	232	02/01/99	-3.083333	-73.416667	2515270898	12/04/21	Imerí province	94840	0	0	59654	166811	884275	0.688677822	0.838352233	0.270001605	0.078667529	0	0	0.049481577	0.138365766	0.733485127
03/08/20	962	GBIF	PRESERVED_SPECIMEN	L	2515237662	SPECIES	Theobroma	guianense	Theobroma subincana	Theobroma guianense (Aubl.) J.F.Gmel.	Brandbyge, J. & Asanza, C.E.	30364	27/03/80	-0.533333	-77.033333	2515237662	05/01/21	Napo province	9774	0	0	5060	26943	588743	0.807172745	0.862928331	0.151467803	0.015501491	0	0	0.008025122	0.042731396	0.933741991
03/08/20	965	GBIF	PRESERVED_SPECIMEN	L	2515164191	SPECIES	Theobroma	guianense	0	Theobroma guianense (Aubl.) J.F.Gmel.	Toro, A.P.	425	01/11/87	-0.633333	-72.25	2515164191	05/01/21	Imerí province	4659	0	0	243	683	378187	0.851557101	0.867432952	0.130050374	0.012140021	0	0	0.000633188	0.001779703	0.985447088
03/08/20	968	GBIF	PRESERVED_SPECIMEN	L	2515155463	SPECIES	Herrania	nitida	0	Herrania nitida (Poepp.) R.E.Schult.	Holm-Nielsen, L.B.; et al.	22663	24/03/80	-1.416667	-77.033333	2515155463	26/04/21	Napo province	5340	0	0	5693	20503	839685	0.827936445	0.851782382	0.101999246	0.006129329	0	0	0.006534507	0.023533638	0.963802525
03/08/20	971	GBIF	PRESERVED_SPECIMEN	L	2515089620	SPECIES	Herrania	lemniscata	0	Herrania lemniscata (Schomb.) R.E.Schult.	Davidse, G. & GonzÃ¡les, A.C.	16521	04/04/79	8.383333	-62.383333	2515089620	10/11/20	Guianan Lowlands province	126043	0	0	103756	252254	310610	0.471667384	0.486887127	0.300181115	0.15901209	0	0	0.130895475	0.318236123	0.391856312
03/08/20	2113	GBIF	PRESERVED_SPECIMEN	INC	2013949140	SPECIES	Theobroma	guianense	0	Theobroma guianense (Aubl.) J.F.Gmel.	Davila, D.; et al.	301	18/11/00	0.070278	-72.457778	1416799312	24/03/21	Imerí province	2240	0	0	517	34935	1167911	0.821380843	0.843448281	0.084969133	0.001857991	0	0	0.000428831	0.028977201	0.968735977
03/08/20	1057	GBIF	PRESERVED_SPECIMEN	L	2513384435	SPECIES	Herrania	purpurea	Theobroma purpureum Pittier	Herrania purpurea (Pittier) R.E.Schult.	s.c.	s.n.	//	0	0	0	08/12/20	0	0	0	0	0	0	0	0	0	0	NA	NA	NA	NA	NA	NA
03/08/20	12617	GBIF	PRESERVED_SPECIMEN	F	1228383430	SPECIES	Theobroma	speciosum	0	Theobroma speciosum Willd. ex Spreng.	Daly, D.C.; et al.	1165	01/11/81	-3.909262	-49.673567	1931085500	14/08/20	Pará province	137407	0	0	3319	23811	695604	0.609923629	0.814395905	0.485758946	0.15974939	0	0	0.00385867	0.027682671	0.80870927
03/08/20	1111	GBIF	PRESERVED_SPECIMEN	L	2513273875	SPECIES	Theobroma	glaucum	0	Theobroma glaucum H.Karst.	Nee, M.H.	7919	01/01/73	9.250556	-78.934167	0	08/09/20	Pacific dominion	0	0	0	0	0	0	0	0	0	NA	NA	NA	NA	NA	NA
03/08/20	1113	GBIF	PRESERVED_SPECIMEN	US	2513273449	SPECIES	Theobroma	glaucum	Theobroma capilliferum	Theobroma glaucum H.Karst.	Cuatrecasas, J.	17034	23/04/44	3.47	-76.93	1228252022	11/11/20	Cauca province	0	0	0	0	0	0	0	0	0	NA	NA	NA	NA	NA	NA
03/08/20	1133	GBIF	PRESERVED_SPECIMEN	L	2513122149	SPECIES	Theobroma	stipulatum	0	Theobroma stipulatum Cuatrec.	Cuatrecasas, J.	21339	28/05/46	0	0	2513122149	19/10/20	0	0	0	0	0	0	0	0	0	0	NA	NA	NA	NA	NA	NA
03/08/20	1165	GBIF	PRESERVED_SPECIMEN	FUEL	2464851012	SPECIES	Theobroma	guianense	0	Theobroma guianense (Aubl.) J.F.Gmel.	Cid-Ferreira, C.A.; et al.	10876	21/03/92	-8.3	-72.7333	1928105496	24/03/21	Rondônia province	4348	0	0	2996	15879	1182379	0.860628719	0.875384629	0.083371919	0.003606497	0	0	0.002485066	0.013171013	0.980737424
03/08/20	1189	GBIF	PRESERVED_SPECIMEN	ESA	2459934475	SPECIES	Theobroma	guianense	0	Theobroma guianense (Aubl.) J.F.Gmel.	Romaniuc Neto, S.	489	02/10/86	-10.5925046	-62.5847888	0	24/03/21	Madeira province	1008	0	0	1345	27040	522678	0.742235186	0.742996335	0.095930046	0.001825852	0	0	0.002436281	0.048979207	0.94675866
03/08/20	1194	GBIF	PRESERVED_SPECIMEN	ESA	2459915564	SPECIES	Theobroma	sylvestre	0	Theobroma sylvestre Mart.	Oliveira, A.A.	1333	/3/1993	-2.6259194	-60.259628	0	26/08/20	Roraima province	768	0	0	1539	8785	600031	0.823290182	0.834296703	0.065943966	0.001256703	0	0	0.002518315	0.014375175	0.981849808
03/08/20	1200	GBIF	PRESERVED_SPECIMEN	ESA	2459914461	SPECIES	Theobroma	guianense	0	Theobroma guianense (Aubl.) J.F.Gmel.	Oliveira, A.A.	591	/1/1993	-2.6259194	-60.259628	0	24/03/21	Roraima province	768	0	0	1539	8785	600031	0.823290182	0.834296703	0.065943966	0.001256703	0	0	0.002518315	0.014375175	0.981849808
03/08/20	1206	GBIF	PRESERVED_SPECIMEN	ESA	2459903523	SPECIES	Theobroma	guianense	0	Theobroma guianense (Aubl.) J.F.Gmel.	Souza, V.C.; et al.	18691	10/07/97	-10.366667	-58.833333	0	24/03/21	Madeira province	3063	0	0	2587	39714	651244	0.795616447	0.848648667	0.115403433	0.004397021	0	0	0.00371371	0.057010543	0.934878727
03/08/20	12813	GBIF	PRESERVED_SPECIMEN	F	1228209568	SPECIES	Theobroma	speciosum	0	Theobroma speciosum Willd. ex Spreng.	Treacy, J. & Alcorn, J.B.	406	11/06/81	-3	-72.0833	1318491303	13/04/21	Imerí province	27815	0	0	4718	22795	1150271	0.794087188	0.831438124	0.169150874	0.023071519	0	0	0.003913407	0.018907614	0.95410746
03/08/20	1209	GBIF	PRESERVED_SPECIMEN	ESA	2459903157	SPECIES	Theobroma	guianense	0	Theobroma guianense (Aubl.) J.F.Gmel.	Ivanauskas, N.M.; et al.	2018	02/06/97	-9.778611	0	0	24/03/21	0	0	0	0	0	0	0	0	0	0	NA	NA	NA	NA	NA	NA
03/08/20	1215	GBIF	PRESERVED_SPECIMEN	ESA	2459865320	SPECIES	Theobroma	speciosum	0	Theobroma speciosum Willd. ex Spreng.	Monteiro, R.S.	289	19/10/91	-5.6315313	-50.0194269	0	12/04/21	Xingu-Tapajós province	12891	0	0	9671	73717	1109317	0.763597567	0.7893821	0.139051439	0.010692637	0	0	0.008021759	0.061145691	0.920139914
03/08/20	1216	GBIF	PRESERVED_SPECIMEN	ESA	2459860424	SPECIES	Theobroma	speciosum	0	Theobroma speciosum Willd. ex Spreng.	Braga, D.P.P.	87	03/03/14	-7.23315	-52.2526507	0	12/08/20	Xingu-Tapajós province	31112	0	0	6756	42794	1124924	0.799894495	0.873896599	0.209796984	0.025806537	0	0	0.005603914	0.035496431	0.933093118
03/08/20	1219	GBIF	PRESERVED_SPECIMEN	ESA	2459837210	SPECIES	Herrania	mariae	0	Herrania mariae (Mart.) Decne. ex Goudot	Kinupp, V.F.; et al.	4361	14/12/10	-2.6259194	-60.259628	0	04/05/21	Roraima province	768	0	0	1539	8785	600031	0.823290182	0.834296703	0.065943966	0.001256703	0	0	0.002518315	0.014375175	0.981849808
03/08/20	1220	GBIF	PRESERVED_SPECIMEN	ESA	2459832475	SPECIES	Theobroma	sylvestre	Theobroma sylvestris G.Don	Theobroma sylvestre Mart.	Coelho, R.	348	12/07/10	-2.6367335	-60.9439105	1424363945	05/03/21	Imerí province	106694	0	0	26484	78665	992656	0.707459034	0.81961298	0.238049976	0.088579567	0	0	0.021987565	0.065309311	0.824123557
03/08/20	1227	GBIF	PRESERVED_SPECIMEN	SP	2452840148	SPECIES	Theobroma	guianense	0	Theobroma guianense (Aubl.) J.F.Gmel.	Cordeiro, I.	186	08/07/85	0.8	-63.35	1930011740	24/03/21	Pantepui province	8592	0	0	46212	226253	924544	0.705275553	0.787929296	0.177411642	0.007126736	0	0	0.03833109	0.187668225	0.766873949
03/08/20	1238	GBIF	PRESERVED_SPECIMEN	RB	2451448910	SPECIES	Theobroma	guianense	0	Theobroma guianense (Aubl.) J.F.Gmel.	R.C. Forzza; R. Goldenberg; P. Labiak; P.C. CantuÃ¡ria; H.J.P. Leal; T.D.S. Medeiros & C. Jaster	9958	14/09/18	1.288056	-52.492778	0	24/03/21	Roraima province	54616	0	0	38762	100867	1011350	0.764858366	0.868604302	0.216908861	0.045302112	0	0	0.032151759	0.083665742	0.838880387
03/08/20	12582	GBIF	PRESERVED_SPECIMEN	F	1228411986	SPECIES	Theobroma	glaucum	0	Theobroma glaucum H.Karst.	Pittier, H.F.	4105	04/08/11	8.5714	-79.9106	1228411986	09/09/20	Pacific dominion	974680	0	0	22448	58660	149730	0.019693257	-0.097276263	0.326254857	0.80851551	0	0	0.018621041	0.04865958	0.124203869
03/08/20	1259	GBIF	PRESERVED_SPECIMEN	BM	2448124312	SPECIES	Herrania	tomentella	0	Herrania tomentella R.E.Schult.	s.c.	s.n.	//	0	0	0	01/12/20	0	0	0	0	0	0	0	0	0	0	NA	NA	NA	NA	NA	NA
03/08/20	1275	GBIF	PRESERVED_SPECIMEN	BM	2448119311	VARIETY	Herrania	nitida	Herrania nitida var. sphenophylla R.E.Schult.	Herrania nitida var. sphenophylla R.E.Schult.	Klug, G.	1853	/12/1930	0.9	-76.16667	1318398375	26/04/21	Napo province	13809	0	0	9030	48851	1133899	0.790527093	0.835181057	0.138432157	0.011454152	0	0	0.007490115	0.040520443	0.94053529
03/08/20	1289	GBIF	PRESERVED_SPECIMEN	BM	2448114337	SPECIES	Theobroma	sinuosum	0	Theobroma sinuosum Pav. ex Huber	s.c.	s.n.	//	0	0	0	19/10/20	0	0	0	0	0	0	0	0	0	0	NA	NA	NA	NA	NA	NA
03/08/20	1291	GBIF	PRESERVED_SPECIMEN	BM	2448114313	SPECIES	Theobroma	gileri	0	Theobroma gileri Cuatrec.	s.c.	s.n.	//	0	0	0	18/09/20	0	0	0	0	0	0	0	0	0	0	NA	NA	NA	NA	NA	NA
03/08/20	1312	GBIF	PRESERVED_SPECIMEN	BM	2448107312	SPECIES	Herrania	cuatrecasana	0	Herrania cuatrecasana GarcÃ­a-Barr.	s.c.	s.n.	//	0	0	0	16/12/20	0	0	0	0	0	0	0	0	0	0	NA	NA	NA	NA	NA	NA
03/08/20	1334	GBIF	PRESERVED_SPECIMEN	BM	2448098312	SPECIES	Theobroma	nemorale	0	Theobroma nemorale Cuatrec.	s.c.	s.n.	23/09/61	0	0	0	29/10/20	0	0	0	0	0	0	0	0	0	0	NA	NA	NA	NA	NA	NA
03/08/20	1343	GBIF	PRESERVED_SPECIMEN	BM	2448095309	SPECIES	Theobroma	chocoense	0	Theobroma chocoense Cuatrec.	s.c.	s.n.	//	0	0	0	22/10/20	0	0	0	0	0	0	0	0	0	0	NA	NA	NA	NA	NA	NA
03/08/20	1344	GBIF	PRESERVED_SPECIMEN	BM	2448094313	SPECIES	Herrania	pulcherrima	0	Herrania pulcherrima Goudot	s.c.	s.n.	//	0	0	0	14/12/20	0	0	0	0	0	0	0	0	0	0	NA	NA	NA	NA	NA	NA
03/08/20	1355	GBIF	PRESERVED_SPECIMEN	BM	2448089312	VARIETY	Herrania	nitida	Herrania aspera	Herrania nitida (Poepp.) R.E.Schult.	Killip, E.P.	34247	17/03/39	4.1491688	-73.6285475	2448089312	26/04/21	Pacific dominion	19292	0	0	17808	277862	398377	0.612739273	0.628385723	0.174726478	0.027044645	0	0	0.024964288	0.389523074	0.558467993
03/08/20	1358	GBIF	PRESERVED_SPECIMEN	BM	2448089309	SPECIES	Theobroma	mammosum	0	Theobroma mammosum Cuatrec. & J.LeÃ³n	s.c.	s.n.	//	0	0	0	30/10/20	0	0	0	0	0	0	0	0	0	0	NA	NA	NA	NA	NA	NA
03/08/20	10285	GBIF	PRESERVED_SPECIMEN	MO	1260451896	SPECIES	Theobroma	speciosum	Theobroma guianensis	Theobroma speciosum Willd. ex Spreng.	Jansen-Jacobs, M.J.; et al.	2996	18/10/92	2	-59.25	1424762801	04/12/20	Guianan Lowlands province	89310	0	0	176182	209116	608029	0.58049119	0.706547618	0.267010169	0.082493024	0	0	0.162734139	0.193154307	0.56161853
03/08/20	12371	GBIF	PRESERVED_SPECIMEN	F	1228593146	SPECIES	Theobroma	speciosum	0	Theobroma speciosum Willd. ex Spreng.	Jipa, H. & Irvine, D.	s.n.	29/04/84	-0.5	-77.3333333	1228593146	12/04/21	Napo province	37301	0	0	13067	40333	725357	0.748574975	0.816042781	0.188949766	0.045708761	0	0	0.016012342	0.049424183	0.888854714
03/08/20	1530	GBIF	PRESERVED_SPECIMEN	K	2429010971	SPECIES	Theobroma	simiarum	0	Theobroma simiarum Donn.Sm.	Tonduz, A.	8373	/11/1893	9.9059803	-83.6800512	2429010971	22/10/20	Puntarenas-Chiriquí province	350250	0	0	33738	101317	719380	0.488029121	0.739880562	0.463435559	0.290739903	0	0	0.028005661	0.084102483	0.597151953
03/08/20	1575	GBIF	PRESERVED_SPECIMEN	HORI	2427925619	SPECIES	Herrania	albiflora	0	Herrania albiflora Goudot	Santana, F.J.M.	s.n.	03/12/17	6.423325	-71.746442	0	06/11/20	Pacific dominion	67009	0	0	94534	556813	487127	0.534113553	0.535862803	0.210646977	0.055586848	0	0	0.078420019	0.461900334	0.404092799
03/08/20	1578	GBIF	PRESERVED_SPECIMEN	US	2426937865	SPECIES	Theobroma	guianense	0	Theobroma guianense (Aubl.) J.F.Gmel.	RÃ¡squez, R.; et al.	36751	14/09/10	-10.2297	-75.2242	2426937865	05/01/21	Ucayali province	137869	0	0	37259	209614	820425	0.649938518	0.777584195	0.27308621	0.114398254	0	0	0.030916047	0.173929422	0.680756277
03/08/20	1585	GBIF	PRESERVED_SPECIMEN	EAFM	2425046212	SPECIES	Theobroma	guianense	0	Theobroma guianense (Aubl.) J.F.Gmel.	Chaves, M.S. & Chaves, R.S.	75	01/05/15	-2.603619	-54.664759	0	17/03/21	Xingu-Tapajós province	308326	0	0	24391	92646	477834	0.346147125	0.642649174	0.561244672	0.341371816	0	0	0.027005183	0.102575629	0.529047373
03/08/20	1587	GBIF	PRESERVED_SPECIMEN	RB	2423618705	SPECIES	Theobroma	microcarpum	0	Theobroma microcarpum Mart.	PaixÃ£o, K.R.C.; et al.	156	12/03/18	-8.685833	-63.861111	0	12/04/21	Madeira province	60088	0	0	39614	156457	751059	0.669723437	0.780144274	0.223469626	0.059657393	0	0	0.039330115	0.155335786	0.745676706
03/08/20	313	GBIF	PRESERVED_SPECIMEN	WAG	2626701351	SPECIES	Theobroma	speciosum	0	Theobroma speciosum Willd. ex Spreng.	Poole, H.A.C.	42	//1966	9.9	-83.683333	2626701351	10/08/20	Puntarenas-Chiriquí province	350250	0	0	33738	101317	719380	0.488029121	0.739880562	0.463435559	0.290739903	0	0	0.028005661	0.084102483	0.597151953
03/08/20	1599	GBIF	PRESERVED_SPECIMEN	UCR	2422401215	SPECIES	Herrania	purpurea	0	Herrania purpurea (Pittier) R.E.Schult.	Sanders, A.C. & Baker, M.	19303	06/07/96	9.78333	-84.93333	0	08/12/20	North America	272130	0	0	357	7481	79056	0.0559726	-0.092024542	0.434705106	0.757971612	0	0	0.000994362	0.020837047	0.220196978
03/08/20	1605	GBIF	PRESERVED_SPECIMEN	CHSC	2418007631	SPECIES	Theobroma	guianense	0	Theobroma guianense (Aubl.) J.F.Gmel.	Gudino, E. & Carlos Quelal, N.C.	831	01/09/90	-1.566667	-77.416667	0	24/03/21	Napo province	90900	0	0	27340	80213	1006289	0.715861168	0.815963745	0.227841836	0.075451839	0	0	0.022693656	0.066581061	0.835273444
03/08/20	1607	GBIF	PRESERVED_SPECIMEN	RB	2412489994	SPECIES	Theobroma	guianense	0	Theobroma guianense (Aubl.) J.F.Gmel.	Paixao, K.R.C.; et al.	39	21/01/17	-9.562222	-64.079167	0	20/11/20	Madeira province	35559	0	0	18381	68490	975849	0.763115406	0.85642916	0.223352096	0.032377019	0	0	0.016736185	0.062361203	0.888525593
03/08/20	1608	GBIF	PRESERVED_SPECIMEN	RB	2412489938	SPECIES	Theobroma	guianense	0	Theobroma guianense (Aubl.) J.F.Gmel.	Mendes, I.M.; et al.	363	20/10/17	-11.740833	-64.887778	2412489938	20/11/20	Madeira province	18569	0	0	1689	34566	1150753	0.821960545	0.865185738	0.161892629	0.015402583	0	0	0.001400989	0.028671748	0.95452468
03/08/20	1610	GBIF	PRESERVED_SPECIMEN	US	2397813784	SPECIES	Herrania	purpurea	0	Herrania purpurea (Pittier) R.E.Schult.	Croat, T.B.	13798	26/02/71	9.125989	-79.92189	2397813784	08/12/20	Pacific dominion	243948	0	0	5530	11473	37421	0.070046861	-0.066420667	0.298634729	0.817596825	0	0	0.018533911	0.038452	0.125417264
03/08/20	1632	GBIF	PRESERVED_SPECIMEN	US	2397727129	SPECIES	Herrania	purpurea	0	Herrania purpurea (Pittier) R.E.Schult.	Tyson, E.L.; et al.	4713	16/07/66	8.64451	-78.15946	2397727129	08/12/20	Pacific dominion	0	0	0	0	0	0	0	0	0	NA	NA	NA	NA	NA	NA
03/08/20	1687	GBIF	PRESERVED_SPECIMEN	MG	2365705292	SPECIES	Theobroma	speciosum	0	Theobroma speciosum Willd. ex Spreng.	Antonio, L.C.	PSACF/581	18/07/12	-3.1509697	-51.9555921	0	13/08/20	Xingu-Tapajós province	65347	0	0	5757	176970	773917	0.688004111	0.791157126	0.288686112	0.063940876	0	0	0.005633122	0.173161995	0.757264007
03/08/20	11	GBIF	PRESERVED_SPECIMEN	SP	2814658372	SPECIES	Theobroma	speciosum	0	Theobroma speciosum Willd. ex Spreng.	Vicentini, A. & Silva, C.F.	422	11/03/94	-2.883333	-59.966667	1265517970	25/03/21	Roraima province	162096	0	0	27965	95764	796175	0.615719998	0.799432695	0.378651822	0.14981146	0	0	0.025845656	0.08850647	0.735836414
03/08/20	414	GBIF	PRESERVED_SPECIMEN	SP	2598700284	SPECIES	Theobroma	speciosum	0	Theobroma speciosum Willd. ex Spreng.	Balick, M.J.	1485	31/08/83	-3.5	-45.5	1095192187	10/08/20	Pará province	45992	0	0	7224	110841	1017595	0.715253987	0.765435934	0.210175038	0.038921781	0	0	0.006113475	0.093801728	0.861163016
03/08/20	1692	GBIF	PRESERVED_SPECIMEN	MG	2365698418	SPECIES	Herrania	nitida	0	Herrania nitida (Poepp.) R.E.Schult.	Oliveira, A.A. & Giacomin, L.	4642	20/07/18	-2.576111	-54.361111	2365698418	07/06/21	Xingu-Tapajós province	308326	0	0	24391	92646	477834	0.346147125	0.642649174	0.561244672	0.341371816	0	0	0.027005183	0.102575629	0.529047373
03/08/20	1694	GBIF	PRESERVED_SPECIMEN	MG	2365696830	SPECIES	Theobroma	guianense	0	Theobroma guianense (Aubl.) J.F.Gmel.	Rocha, S.F.R.	s.n.	09/01/11	-1.3973898	-48.3198725	2365696830	17/03/21	Pará province	340265	0	0	27035	185859	652409	0.410442507	0.658553213	0.55760358	0.282244552	0	0	0.022425114	0.154167164	0.54116317
03/08/20	1696	GBIF	PRESERVED_SPECIMEN	MG	2365696077	SPECIES	Herrania	nitida	0	Herrania nitida (Poepp.) R.E.Schult.	Rocha, S.F.R.	s.n.	09/01/11	-1.3973898	-48.3198725	2365696077	13/05/21	Pará province	340265	0	0	27035	185859	652409	0.410442507	0.658553213	0.55760358	0.282244552	0	0	0.022425114	0.154167164	0.54116317
03/08/20	606	GBIF	PRESERVED_SPECIMEN	U	2517476057	SPECIES	Theobroma	speciosum	0	Theobroma speciosum Willd. ex Spreng.	Prance, G.T.; et al.	25159	10/11/77	-8.764062	-54.969159	1321839116	10/08/20	Xingu-Tapajós province	63261	0	0	26639	98174	1017491	0.744952686	0.843663931	0.215705811	0.052474151	0	0	0.022096693	0.081434016	0.843995139
03/08/20	1698	GBIF	PRESERVED_SPECIMEN	MG	2365695357	SPECIES	Theobroma	guianense	0	Theobroma guianense (Aubl.) J.F.Gmel.	Bruno, J. & Zanzini, L.P.	87	07/07/16	-7.4447953	-57.3030347	2365695357	17/03/21	Xingu-Tapajós province	13043	0	0	5256	32076	1155210	0.845615929	0.882473528	0.146840802	0.010818814	0	0	0.004359709	0.02660617	0.958215306
03/08/20	615	GBIF	PRESERVED_SPECIMEN	U	2517466104	SPECIES	Theobroma	speciosum	0	Theobroma speciosum Willd. ex Spreng.	Berg, C.C.; et al.	541	15/10/77	-6	-50.25	2517466104	10/08/20	Xingu-Tapajós province	6037	0	0	1579	18682	869982	0.855749315	0.893969536	0.114010293	0.006735618	0	0	0.001761726	0.020843933	0.970658723
03/08/20	1702	GBIF	PRESERVED_SPECIMEN	RB	2350521251	SPECIES	Theobroma	guianense	0	Theobroma guianense (Aubl.) J.F.Gmel.	Bigio, N.C.; et al.	2297	26/10/17	-9.036389	-63.270278	0	24/03/21	Madeira province	65332	0	0	12157	73394	1041097	0.744790557	0.849641085	0.269602511	0.054809644	0	0	0.010198997	0.061573181	0.873418178
03/08/20	3554	GBIF	PRESERVED_SPECIMEN	COAH	1891236953	SPECIES	Theobroma	guianense	0	Theobroma guianense (Aubl.) J.F.Gmel.	Trujillo, W.; et al.	1016	06/10/07	1.6025	-75.86389	1891236953	28/12/20	Paramo province	60246	0	0	38315	208695	898313	0.645858117	0.691591322	0.200438716	0.049973083	0	0	0.031781673	0.173109129	0.745136114
03/08/20	3558	GBIF	PRESERVED_SPECIMEN	COAH	1891236890	SPECIES	Theobroma	guianense	0	Theobroma guianense (Aubl.) J.F.Gmel.	CÃ¡rdenas, D.; et al.	42411	13/03/12	1.581	-75.94833	1891236890	28/12/20	Paramo province	0	0	0	0	0	0	0	0	0	NA	NA	NA	NA	NA	NA
03/08/20	3556	GBIF	PRESERVED_SPECIMEN	COAH	1891236946	SPECIES	Theobroma	guianense	0	Theobroma guianense (Aubl.) J.F.Gmel.	CÃ¡rdenas, D.; et al.	42216	27/07/11	1.60522	-75.88903	1891236946	28/12/20	Paramo province	60246	0	0	38315	208695	898313	0.645858117	0.691591322	0.200438716	0.049973083	0	0	0.031781673	0.173109129	0.745136114
03/08/20	3557	GBIF	PRESERVED_SPECIMEN	COAH	1891236921	SPECIES	Theobroma	guianense	0	Theobroma guianense (Aubl.) J.F.Gmel.	Trujillo, W.; et al.	3072	28/06/13	1.60861	-75.92111	1891236921	28/12/20	Paramo province	0	0	0	0	0	0	0	0	0	NA	NA	NA	NA	NA	NA
03/08/20	1795	GBIF	PRESERVED_SPECIMEN	RB	2302267714	SPECIES	Theobroma	microcarpum	0	Theobroma microcarpum Mart.	Giacomin, L.L.; et al.	3064	20/06/18	-2.813611	-54.283056	0	12/04/21	Xingu-Tapajós province	5786	0	0	11800	77942	1110076	0.806277602	0.855893672	0.128866953	0.004799254	0	0	0.009787625	0.064649752	0.920763368
03/08/20	1804	GBIF	PRESERVED_SPECIMEN	CEPEC	2285966797	SPECIES	Theobroma	obovatum	0	Theobroma obovatum Klotzsch ex Bernoulli	Matos, J.R.	8	06/02/15	-22.9674	-43.2235	1424502448	23/09/20	0	797996	0	0	34788	79781	292128	0.172428217	-0.043478262	0.393763827	0.662406107	0	0	0.028877067	0.066225171	0.242491656
03/08/20	1808	GBIF	PRESERVED_SPECIMEN	US	2284377556	SPECIES	Theobroma	gileri	0	Theobroma gileri Cuatrec.	BonitÃ¡z, C. & Cornejo, X.F.	3842	10/09/98	0.35	-79.02	1322950384	18/09/20	Cauca province	0	0	0	0	0	0	0	0	0	NA	NA	NA	NA	NA	NA
03/08/20	1810	GBIF	PRESERVED_SPECIMEN	US	2284364575	SPECIES	Theobroma	glaucum	0	Theobroma glaucum H.Karst.	CorrÃªa, M.D.; et al.	11531	06/05/99	9.3333333	-79.7666667	2284364575	08/09/20	Pacific dominion	0	0	0	0	0	0	0	0	0	NA	NA	NA	NA	NA	NA
03/08/20	1812	GBIF	PRESERVED_SPECIMEN	US	2284336264	SUBSPECIES	Theobroma	glaucum	0	Theobroma glaucum H.Karst.	Cuatrecasas, J.	17350	04/05/44	3.516667	-77.316667	1228585747	08/09/20	Pacific dominion	0	0	0	0	0	0	0	0	0	NA	NA	NA	NA	NA	NA
03/08/20	1815	GBIF	PRESERVED_SPECIMEN	US	2284310974	SPECIES	Theobroma	simiarum	0	Theobroma simiarum Donn.Sm.	G. Tipaz, P.M.V. & Chapiro, M.	2371	27/11/92	0.75	-78.7833	0	22/10/20	Cauca province	0	0	0	0	0	0	0	0	0	NA	NA	NA	NA	NA	NA
03/08/20	1816	GBIF	PRESERVED_SPECIMEN	US	2284308564	SUBSPECIES	Theobroma	glaucum	0	Theobroma glaucum H.Karst.	Cuatrecasas, J. & PatiÃ±o, V.M.	27458	21/02/69	6.666667	-75.85	1318381370	09/09/20	Cauca province	30775	0	0	17557	117505	416423	0.646388226	0.713043451	0.202567436	0.052854395	0	0	0.030153196	0.20180847	0.715183938
03/08/20	1817	GBIF	PRESERVED_SPECIMEN	US	2284306719	SPECIES	Theobroma	simiarum	0	Theobroma simiarum Donn.Sm.	Willard, L.	s.n.	/9/1962	7.33	-76.43	0	23/10/20	Cauca province	0	0	0	0	0	0	0	0	0	NA	NA	NA	NA	NA	NA
03/08/20	1818	GBIF	PRESERVED_SPECIMEN	US	2284305589	SPECIES	Theobroma	mammosum	0	Theobroma mammosum Cuatrec. & J.LeÃ³n	Cuatrecasas, J. & Leon, J.	26516	04/11/61	9.8237676	-83.5444845	0	30/10/20	Puntarenas-Chiriquí province	350250	0	0	33738	101317	719380	0.488029121	0.739880562	0.463435559	0.290739903	0	0	0.028005661	0.084102483	0.597151953
03/08/20	1823	GBIF	PRESERVED_SPECIMEN	US	2284272789	SUBSPECIES	Theobroma	glaucum	0	Theobroma glaucum H.Karst.	Callejas, R.; et al.	9286	02/03/90	6.65	-74.55	0	09/09/20	Magdalena province	81176	0	0	55410	328746	740243	0.614404386	0.664611578	0.224985237	0.067333845	0	0	0.045961471	0.272688136	0.614016548
03/08/20	1825	GBIF	PRESERVED_SPECIMEN	US	2284269037	SPECIES	Theobroma	glaucum	0	Theobroma glaucum H.Karst.	Dressler, R.L.	3482	20/04/68	9.32333	-79.65	1318730828	09/09/20	Pacific dominion	0	0	0	0	0	0	0	0	0	NA	NA	NA	NA	NA	NA
03/08/20	1829	GBIF	PRESERVED_SPECIMEN	US	2284236653	SPECIES	Theobroma	gileri	0	Theobroma gileri Cuatrec.	Tirado, M.; et al.	615	28/10/93	-0.8166667	-78.75	1319953463	18/09/20	Cauca province	0	0	0	0	0	0	0	0	0	NA	NA	NA	NA	NA	NA
03/08/20	1838	GBIF	PRESERVED_SPECIMEN	US	2284199678	SPECIES	Theobroma	simiarum	0	Theobroma simiarum Donn.Sm.	C. Aulestia, E.A. & Guanga, M.	734	22/11/92	0.9167	-78.5333	0	23/10/20	Cauca province	0	0	0	0	0	0	0	0	0	NA	NA	NA	NA	NA	NA
03/08/20	1844	GBIF	PRESERVED_SPECIMEN	US	2284184117	SPECIES	Theobroma	microcarpum	0	Theobroma microcarpum Mart.	Cid-Ferreira, C.A.; et al.	7336	06/05/86	-4.713082	-68.4043063	1320310715	14/09/20	Madeira province	6822	0	0	1942	8666	1177430	0.819974018	0.831480801	0.09044945	0.005709456	0	0	0.001625295	0.007252733	0.985412517
03/08/20	1845	GBIF	PRESERVED_SPECIMEN	US	2284181008	SPECIES	Theobroma	gileri	0	Theobroma gileri Cuatrec.	Dorr, L.J. & Valdespino, I.A.	6688	18/07/89	-0.0833333	-79.0833333	1318559158	18/09/20	Cauca province	0	0	0	0	0	0	0	0	0	NA	NA	NA	NA	NA	NA
03/08/20	1849	GBIF	PRESERVED_SPECIMEN	US	2284168742	SPECIES	Theobroma	microcarpum	0	Theobroma microcarpum Mart.	Archer, W.A.	7551	11/08/42	-1.453489	-48.476548	1318536750	14/09/20	Pará province	340265	0	0	27035	185859	652409	0.410442507	0.658553213	0.55760358	0.282244552	0	0	0.022425114	0.154167164	0.54116317
03/08/20	1856	GBIF	PRESERVED_SPECIMEN	US	2284150029	SPECIES	Theobroma	simiarum	0	Theobroma simiarum Donn.Sm.	Hunter, J.	s.n.	//1981	8.55	-83.5	0	23/10/20	Puntarenas-Chiriquí province	584409	0	0	26216	68443	526290	0.316018157	0.261051312	0.473064075	0.484842677	0	0	0.021749555	0.0567823	0.436625467
03/08/20	1859	GBIF	PRESERVED_SPECIMEN	US	2284142255	SPECIES	Theobroma	mammosum	0	Theobroma mammosum Cuatrec. & J.LeÃ³n	Cuatrecasas, J. & Paredes, A.	26535	6-7/11/1961	9.9917	-83.1128	1701728747	30/10/20	Pacific dominion	729285	0	0	2609	17814	454937	0.274036815	-0.037151702	0.439671197	0.60539412	0	0	0.002165783	0.014787759	0.377652337
03/08/20	4179	GBIF	PRESERVED_SPECIMEN	FMB	1707522389	SPECIES	Theobroma	glaucum	0	Theobroma glaucum H.Karst.	Rudas, A.; et al.	4972	08/07/92	-3.033333	-70	1707522389	04/09/20	Imerí province	4364	0	0	402	1246	546949	0.830305596	0.842488408	0.112975706	0.007892057	0	0	0.000726995	0.002253323	0.989127624
03/08/20	1900	GBIF	PRESERVED_SPECIMEN	ASU	2270557620	SPECIES	Theobroma	mammosum	0	Theobroma mammosum Cuatrec. & J.LeÃ³n	Landrum, L.R.; et al.	10212	14/05/02	10.1666667	-84	2270557620	30/10/20	Pacific dominion	188491	0	0	18907	77364	920812	0.644865652	0.806669891	0.349812485	0.156349589	0	0	0.015682986	0.064171921	0.763795503
03/08/20	1929	GBIF	PRESERVED_SPECIMEN	MO	2268908262	SPECIES	Theobroma	obovatum	0	Theobroma obovatum Klotzsch ex Bernoulli	Medeiros, H.	472	20/04/10	-9.4316667	-68.6238889	1319811146	23/09/20	Rondônia province	52725	0	0	33310	104879	1014678	0.753295128	0.854032964	0.213709128	0.043733701	0	0	0.027629579	0.086993776	0.841642944
03/08/20	2058	GBIF	PRESERVED_SPECIMEN	HPAN	2236677611	SPECIES	Theobroma	speciosum	0	Theobroma speciosum Willd. ex Spreng.	Lemes, S.A.L.; et al.	76	23/11/17	-16.5173887	-57.8380121	0	13/08/20	Rondônia province	20586	0	0	2813	123112	1058981	0.738346448	0.778923273	0.175984407	0.017076845	0	0	0.002333487	0.102125937	0.878463731
03/08/20	627	GBIF	PRESERVED_SPECIMEN	U	2517461060	SPECIES	Theobroma	speciosum	0	Theobroma speciosum Willd. ex Spreng.	Silva, A.S.; et al.	131	21/10/77	-4.4342	-49.1414	1931319456	11/08/20	Pará province	1978	0	0	3280	19958	1074513	0.840626357	0.88341105	0.095665942	0.001798625	0	0	0.002982553	0.018148107	0.977070715
03/08/20	2097	GBIF	PRESERVED_SPECIMEN	HERBAM	2027496260	SPECIES	Theobroma	speciosum	0	Theobroma speciosum Willd. ex Spreng.	Soares, C.R.A.; et al.	196707	18/06/12	-9.350278	-56.773333	0	13/08/20	Madeira province	13821	0	0	6056	106258	627801	0.753231789	0.845350951	0.196070495	0.018331795	0	0	0.008032512	0.140937692	0.832698001
03/08/20	2098	GBIF	PRESERVED_SPECIMEN	HERBAM	2027496223	SPECIES	Theobroma	speciosum	0	Theobroma speciosum Willd. ex Spreng.	Soares, C.R.A.; et al.	1686696	15/06/12	-9.321389	-56.788333	0	13/08/20	Madeira province	13821	0	0	6056	106258	627801	0.753231789	0.845350951	0.196070495	0.018331795	0	0	0.008032512	0.140937692	0.832698001
03/08/20	2099	GBIF	PRESERVED_SPECIMEN	HERBAM	2027496145	SPECIES	Theobroma	speciosum	0	Theobroma speciosum Willd. ex Spreng.	Soares, C.R.A.; et al.	516555	07/06/12	-9.353611	-56.775833	0	13/08/20	Madeira province	13821	0	0	6056	106258	627801	0.753231789	0.845350951	0.196070495	0.018331795	0	0	0.008032512	0.140937692	0.832698001
03/08/20	2100	GBIF	PRESERVED_SPECIMEN	HERBAM	2027495965	SPECIES	Theobroma	speciosum	0	Theobroma speciosum Willd. ex Spreng.	Soares, C.R.A.; et al.	Triag-2316345	12/05/12	-9.403611	-56.851389	0	13/08/20	Madeira province	13821	0	0	6056	106258	627801	0.753231789	0.845350951	0.196070495	0.018331795	0	0	0.008032512	0.140937692	0.832698001
03/08/20	2102	GBIF	PRESERVED_SPECIMEN	HERBAM	2027494936	SPECIES	Theobroma	guianense	0	Theobroma guianense (Aubl.) J.F.Gmel.	Soares, C.R.A.; et al.	1234932	27/12/11	-9.338056	-56.778611	0	17/03/21	Madeira province	13821	0	0	6056	106258	627801	0.753231789	0.845350951	0.196070495	0.018331795	0	0	0.008032512	0.140937692	0.832698001
03/08/20	2103	GBIF	PRESERVED_SPECIMEN	HERBAM	2027494901	SPECIES	Theobroma	guianense	0	Theobroma guianense (Aubl.) J.F.Gmel.	Soares, C.R.A.; et al.	Triag-124663	29/11/11	-9.336389	-56.814444	0	17/03/21	Madeira province	13821	0	0	6056	106258	627801	0.753231789	0.845350951	0.196070495	0.018331795	0	0	0.008032512	0.140937692	0.832698001
03/08/20	2104	GBIF	PRESERVED_SPECIMEN	HERBAM	2027494676	SPECIES	Herrania	mariae	0	Herrania mariae (Mart.) Decne. ex Goudot	Soares, C.R.A.; et al.	214486	29/10/11	-9.3425	-56.781667	0	07/05/21	Madeira province	13821	0	0	6056	106258	627801	0.753231789	0.845350951	0.196070495	0.018331795	0	0	0.008032512	0.140937692	0.832698001
03/08/20	2105	GBIF	PRESERVED_SPECIMEN	HERBAM	2027494650	SPECIES	Theobroma	guianense	0	Theobroma guianense (Aubl.) J.F.Gmel.	Soares, C.R.A.; et al.	234488	29/10/11	-9.343056	-56.782222	0	17/03/21	Madeira province	13821	0	0	6056	106258	627801	0.753231789	0.845350951	0.196070495	0.018331795	0	0	0.008032512	0.140937692	0.832698001
03/08/20	2106	GBIF	PRESERVED_SPECIMEN	HERBAM	2027494410	SPECIES	Theobroma	speciosum	0	Theobroma speciosum Willd. ex Spreng.	Soares, C.R.A.; et al.	864035	28/09/11	-9.347778	-56.776111	0	13/08/20	Madeira province	13821	0	0	6056	106258	627801	0.753231789	0.845350951	0.196070495	0.018331795	0	0	0.008032512	0.140937692	0.832698001
03/08/20	2107	GBIF	PRESERVED_SPECIMEN	HERBAM	2027494388	SPECIES	Theobroma	guianense	0	Theobroma guianense (Aubl.) J.F.Gmel.	Soares, C.R.A.; et al.	663967	14/09/11	-9.308889	-56.795833	0	17/03/21	Madeira province	13821	0	0	6056	106258	627801	0.753231789	0.845350951	0.196070495	0.018331795	0	0	0.008032512	0.140937692	0.832698001
03/08/20	2108	GBIF	PRESERVED_SPECIMEN	HERBAM	2027494322	SPECIES	Theobroma	speciosum	0	Theobroma speciosum Willd. ex Spreng.	Soares, C.R.A.; et al.	7003	11/08/12	-9.314778	-56.781083	0	13/08/20	Madeira province	13821	0	0	6056	106258	627801	0.753231789	0.845350951	0.196070495	0.018331795	0	0	0.008032512	0.140937692	0.832698001
03/08/20	2111	GBIF	PRESERVED_SPECIMEN	ICN	2013949169	SPECIES	Herrania	nitida	0	Herrania nycterodendron R.E.Schult.	LÃ³pez, H.R.	1945	19/11/96	2.21	-73.41	768741747	26/04/21	Imerí province	5083	0	0	2299	92074	1070090	0.770035819	0.813222647	0.109432699	0.004346131	0	0	0.00196572	0.078726275	0.914961874
03/08/20	2118	GBIF	PRESERVED_SPECIMEN	ICN	2013949077	SPECIES	Theobroma	obovatum	0	Theobroma obovatum Klotzsch ex Bernoulli	Duque, A.; et al.	31	01/04/92	-0.5647985	-71.8553653	768752033	23/09/20	Imerí province	9796	0	0	852	5264	1056454	0.820015111	0.835764468	0.126346866	0.009134941	0	0	0.000794505	0.004908772	0.985161782
03/08/20	2120	GBIF	PRESERVED_SPECIMEN	ICN	2013949025	SPECIES	Herrania	nitida	0	Herrania nitida (Poepp.) R.E.Schult.	Velez, G. & Castro, B.	161	13/10/92	-0.6	-72.36	768731290	26/04/21	Imerí province	12200	0	0	901	26466	1166027	0.799760414	0.824206471	0.120056907	0.010119493	0	0	0.000747349	0.021952664	0.967180494
03/08/20	2128	GBIF	PRESERVED_SPECIMEN	RB	2013909586	SPECIES	Theobroma	guianense	0	Theobroma guianense (Aubl.) J.F.Gmel.	Medeiros, H.; et al.	3775	22/09/18	-7.76	-63.816111	0	24/03/21	Madeira province	19	0	0	723	26764	437270	0.814290522	0.845384598	0.087198051	4.09E-05	0	0	0.001555588	0.057584729	0.940818803
03/08/20	2129	GBIF	PRESERVED_SPECIMEN	RB	2013909347	SPECIES	Theobroma	guianense	0	Theobroma guianense (Aubl.) J.F.Gmel.	Medeiros, H.; et al.	3533	19/09/18	-7.783056	-63.838889	0	24/03/21	Madeira province	970	0	0	947	11683	1192001	0.859527511	0.871382654	0.05923009	0.000804578	0	0	0.0007855	0.009690602	0.988719319
03/08/20	2132	GBIF	PRESERVED_SPECIMEN	COL	2013771736	SPECIES	Herrania	purpurea	0	Herrania pulcherrima Goudot	Hermes Cuadros, V.; et al.	3873	16/10/87	8.0583333	-77.2833333	2013771736	08/12/20	Pacific dominion	685920	0	0	19840	63026	413807	0.261064666	-0.036093418	0.412508189	0.58001358	0	0	0.016776693	0.053294751	0.349914975
03/08/20	2136	GBIF	PRESERVED_SPECIMEN	COL	2013770237	SPECIES	Herrania	nycterodendron	0	Herrania nycterodendron R.E.Schult.	Holliday, P.C. & Cope, F.W.	T108	20/04/53	0.8524552	-74.6058862	2013770237	07/04/21	Imerí province	6927	0	0	1641	71320	1001371	0.748039995	0.77191782	0.120145745	0.006406421	0	0	0.001517675	0.065960145	0.926115759
03/08/20	2139	GBIF	PRESERVED_SPECIMEN	COL	2013770120	SPECIES	Herrania	cuatrecasana	0	Herrania cuatrecasana GarcÃ­a-Barr.	Holliday, P.C. & Cope, F.W.	T80	17/03/53	1.09346	-76.62297	2013770021	16/12/20	Napo province	0	0	0	0	0	0	0	0	0	NA	NA	NA	NA	NA	NA
03/08/20	2164	GBIF	PRESERVED_SPECIMEN	COL	2013770052	SPECIES	Herrania	breviligulata	0	Herrania breviligulata R.E.Schult.	Holliday, P.C. & Cope, F.W.	78	17/03/53	1.09346	-76.62297	2013769987	11/11/20	Napo province	0	0	0	0	0	0	0	0	0	NA	NA	NA	NA	NA	NA
03/08/20	4550	GBIF	PRESERVED_SPECIMEN	US	1563256436	SPECIES	Theobroma	glaucum	0	Theobroma glaucum H.Karst.	Orjuela, P.A.	97	07/05/66	3.6509165	-77.0434932	1563256436	09/04/21	Pacific dominion	0	0	0	0	0	0	0	0	0	NA	NA	NA	NA	NA	NA
03/08/20	3580	GBIF	PRESERVED_SPECIMEN	COL	1890988839	SPECIES	Theobroma	glaucum	0	Theobroma glaucum H.Karst.	Hernandez, J.J.; et al.	183	07/12/81	6.010853	-74.937644	1890988839	04/09/20	Magdalena province	40204	0	0	15027	83911	1066426	0.737615009	0.791557491	0.180125394	0.033348596	0	0	0.012464664	0.069602876	0.884583864
03/08/20	2180	GBIF	PRESERVED_SPECIMEN	COL	2013770026	SPECIES	Herrania	camargoana	0	Herrania camargoana R.E.Schult.	Bartley, B.G. & Holiday, P.C.	45	18/11/52	0.521695	-70.046506	2013769990	12/11/20	Imerí province	27550	0	0	35642	129313	1013098	0.750529835	0.838250816	0.184576799	0.022851635	0	0	0.029563629	0.107260018	0.840324717
03/08/20	2190	GBIF	PRESERVED_SPECIMEN	COL	2013770008	SPECIES	Herrania	nitida	0	Herrania nitida (Poepp.) R.E.Schult.	Holliday, P.C. & Cope, F.W.	T106	20/04/53	0.8524552	-74.6058862	1563193104	07/04/21	Imerí province	6927	0	0	1641	71320	1001371	0.748039995	0.77191782	0.120145745	0.006406421	0	0	0.001517675	0.065960145	0.926115759
03/08/20	2201	GBIF	PRESERVED_SPECIMEN	COL	2013769985	SPECIES	Theobroma	obovatum	0	Theobroma obovatum Klotzsch ex Bernoulli	Cope, F.W. & Holliday, P.C.	T95	05/04/53	0.0705753	-75.0985227	1322755859	23/09/20	Napo province	34278	0	0	14764	69006	1087550	0.772680652	0.844256759	0.194574667	0.028432363	0	0	0.012246205	0.057237985	0.902083447
03/08/20	5341	GBIF	PRESERVED_SPECIMEN	US	1321986362	SPECIES	Theobroma	guianense	0	Theobroma guianense (Aubl.) J.F.Gmel.	Jaramillo, N.; et al.	366	09/08/94	-4.9167	-78.3167	1321986362	30/03/21	Ucayali province	0	0	0	0	0	0	0	0	0	NA	NA	NA	NA	NA	NA
03/08/20	2211	GBIF	PRESERVED_SPECIMEN	COL	2013769367	SPECIES	Herrania	nitida	0	Herrania nitida (Poepp.) R.E.Schult.	Garcia-Barriga, H.	14630	01/10/52	-1.427143	-70.038304	0	07/04/21	Imerí province	45312	0	0	20491	74257	1065533	0.764164604	0.846505523	0.223069173	0.037584823	0	0	0.016996615	0.061593755	0.883824807
03/08/20	2213	GBIF	PRESERVED_SPECIMEN	COL	2013769326	SPECIES	Herrania	nitida	0	Herrania nitida (Poepp.) R.E.Schult.	Garcia-Barriga, H.	14486	27/09/52	-1.210098	-69.883349	2013769326	07/04/21	Imerí province	109629	0	0	36788	114974	944176	0.672596348	0.799766243	0.269713641	0.090935634	0	0	0.030515102	0.095369233	0.783180031
03/08/20	2219	GBIF	PRESERVED_SPECIMEN	COL	2013769288	SPECIES	Herrania	nitida	0	Herrania nitida (Poepp.) R.E.Schult.	Idrobo, J.M. & Schultes, R.E.	1325	20/12/50	3.28936	-73.90543	1321268348	07/04/21	Imerí province	10662	0	0	7839	44400	402353	0.74325448	0.805468172	0.171124296	0.022916514	0	0	0.016848861	0.095431743	0.864802882
03/08/20	2220	GBIF	PRESERVED_SPECIMEN	COL	2013769269	SPECIES	Herrania	nitida	0	Herrania nitida (Poepp.) R.E.Schult.	Garcia-Barriga, H.	14821	10/10/52	-1.306642	-69.605207	2013769269	07/04/21	Imerí province	31706	0	0	1182	5893	1116266	0.800548636	0.841839969	0.223691472	0.027449965	0	0	0.001023335	0.005101957	0.966424743
03/08/20	6012	GBIF	PRESERVED_SPECIMEN	US	1319548202	SPECIES	Theobroma	guianense	0	Theobroma guianense (Aubl.) J.F.Gmel.	VÃ squez, R. & Jaramillo, N.	5651	09/10/84	-2.5575012	-73.487784	1319548202	01/04/21	Imerí province	43780	0	0	13538	41649	1106624	0.773002257	0.830774248	0.188468628	0.03631414	0	0	0.011229347	0.034546542	0.917909971
03/08/20	2225	GBIF	PRESERVED_SPECIMEN	COL	2013769105	SPECIES	Herrania	tomentella	0	Herrania tomentella R.E.Schult.	Idrobo, J.M. & Schultes, R.E.	1192	28-28/1/1950	2.1831929	-73.7843783	1999144667	07/04/21	Imerí province	5083	0	0	2299	92074	1070090	0.770035819	0.813222647	0.109432699	0.004346131	0	0	0.00196572	0.078726275	0.914961874
03/08/20	2229	GBIF	PRESERVED_SPECIMEN	COL	2013767901	SPECIES	Theobroma	hylaeum	0	Theobroma hylaeum Cuatrec.	J. Araque, M.	18745-C	14/08/48	7.32878	-76.4798	0	29/10/20	Cauca province	0	0	0	0	0	0	0	0	0	NA	NA	NA	NA	NA	NA
03/08/20	2233	GBIF	PRESERVED_SPECIMEN	COL	2013767477	SPECIES	Theobroma	obovatum	0	Theobroma obovatum Klotzsch ex Bernoulli	Baker, R.E.D. & Cope, F.W.	T27	05/10/52	-1.3231	-69.5785	1322368309	23/09/20	Imerí province	31706	0	0	1182	5893	1116266	0.800548636	0.841839969	0.223691472	0.027449965	0	0	0.001023335	0.005101957	0.966424743
03/08/20	2234	GBIF	PRESERVED_SPECIMEN	COL	2013767453	SPECIES	Theobroma	obovatum	0	Theobroma obovatum Klotzsch ex Bernoulli	Baker, R.E.D. & Cope, F.W.	T30	07/10/52	-1.4769786	-70.9080774	1228563123	23/09/20	Imerí province	88097	0	0	47170	147662	922640	0.679909735	0.816195369	0.2630014	0.073075038	0	0	0.039126753	0.122483242	0.765314967
03/08/20	2235	GBIF	PRESERVED_SPECIMEN	COL	2013767439	SPECIES	Theobroma	guianense	0	Theobroma guianense (Aubl.) J.F.Gmel.	Baker, R.E.D. & Cope, F.W.	T25	29/09/52	-1.3220043	-69.578386	1320572434	17/03/21	Imerí province	31706	0	0	1182	5893	1116266	0.800548636	0.841839969	0.223691472	0.027449965	0	0	0.001023335	0.005101957	0.966424743
03/08/20	2236	GBIF	PRESERVED_SPECIMEN	COL	2013767434	SPECIES	Herrania	camargoana	0	Herrania camargoana R.E.Schult.	Baker, R.E.D.	T35	27/10/52	6.1535326	-75.4268797	2013767434	12/11/20	Cauca province	15458	0	0	10309	124422	948954	0.730005157	0.774602294	0.14826789	0.014063684	0	0	0.009379125	0.113199101	0.863358089
03/08/20	2238	GBIF	PRESERVED_SPECIMEN	COL	2013767397	SPECIES	Herrania	nitida	0	Herrania nitida (Poepp.) R.E.Schult.	Baker, R.E.D. & Cope, F.W.	17	23/09/52	-1.320278	-69.588056	1228149347	07/04/21	Imerí province	31706	0	0	1182	5893	1116266	0.800548636	0.841839969	0.223691472	0.027449965	0	0	0.001023335	0.005101957	0.966424743
03/08/20	2239	GBIF	PRESERVED_SPECIMEN	COL	2013767394	SPECIES	Theobroma	guianense	0	Theobroma guianense (Aubl.) J.F.Gmel.	Baker, R.E.D.	T38	03/11/52	2.6372214	-66.8368105	1424762742	17/03/21	Imerí province	5920	0	0	3113	37401	1150916	0.824068826	0.853919685	0.109297795	0.004944252	0	0	0.002599908	0.031236481	0.961219359
03/08/20	2241	GBIF	PRESERVED_SPECIMEN	COL	2013767389	SPECIES	Herrania	nitida	0	Herrania nitida (Poepp.) R.E.Schult.	Baker, R.E.D. & Cope, F.W.	T14	20/09/52	-1.4769786	-70.9080774	1563304572	07/04/21	Imerí province	88097	0	0	47170	147662	922640	0.679909735	0.816195369	0.2630014	0.073075038	0	0	0.039126753	0.122483242	0.765314967
03/08/20	2247	GBIF	PRESERVED_SPECIMEN	COL	2013767343	SPECIES	Herrania	camargoana	0	Herrania camargoana R.E.Schult.	Baker, R.E.D. & Holliday, P.C.	T39	05/11/52	0	0	1228318083	12/11/20	0	0	0	0	0	0	0	0	0	0	NA	NA	NA	NA	NA	NA
03/08/20	2248	GBIF	PRESERVED_SPECIMEN	COL	2013767335	SPECIES	Herrania	nycterodendron	0	Herrania nycterodendron R.E.Schult.	Baker, R.E.D.	T20	25/09/52	-1.320278	-69.588056	2013767335	07/04/21	Imerí province	31706	0	0	1182	5893	1116266	0.800548636	0.841839969	0.223691472	0.027449965	0	0	0.001023335	0.005101957	0.966424743
03/08/20	2250	GBIF	PRESERVED_SPECIMEN	COL	2013765926	SPECIES	Theobroma	nemorale	0	Theobroma nemorale Cuatrec.	Cuatrecasas, J.	21291	24/05/46	3.8857	-76.9063	2013765926	29/10/20	Pacific dominion	0	0	0	0	0	0	0	0	0	NA	NA	NA	NA	NA	NA
03/08/20	4125	GBIF	PRESERVED_SPECIMEN	FMB	1707550804	SPECIES	Herrania	albiflora	0	Herrania albiflora Goudot	Barbosa, C.E.	5786	22/05/89	8.523333	-77.271944	1707550804	07/06/21	0	685920	0	0	19840	63026	413807	0.261064666	-0.036093418	0.412508189	0.58001358	0	0	0.016776693	0.053294751	0.349914975
03/08/20	2281	GBIF	PRESERVED_SPECIMEN	ECON	1999178697	SPECIES	Herrania	breviligulata	0	Herrania breviligulata R.E.Schult.	Schultes, R.E. & Smith, C.E.	2050	03/12/42	0	0	1999178697	11/11/20	0	0	0	0	0	0	0	0	0	0	NA	NA	NA	NA	NA	NA
03/08/20	2278	GBIF	PRESERVED_SPECIMEN	A	1999324706	FORM	Herrania	nitida	Herrania nitida var. sphenophylla	Herrania nitida f. sphenophylla R.E.Schult.	Schunke-Vigo, J.M.	45	16/01/35	0	0	1999324706	26/04/21	0	0	0	0	0	0	0	0	0	0	NA	NA	NA	NA	NA	NA
03/08/20	2280	GBIF	PRESERVED_SPECIMEN	GH	1999240134	VARIETY	Herrania	pulcherrima	0	Herrania pulcherrima var. pacifica R.E.Schult.	Cuatrecasas, J.	21337	28/05/46	4.16245	-77.13639	1228566472	14/12/20	Pacific dominion	0	0	0	0	0	0	0	0	0	NA	NA	NA	NA	NA	NA
03/08/20	2287	GBIF	PRESERVED_SPECIMEN	GH	1999063002	SPECIES	Herrania	cuatrecasana	0	Herrania cuatrecasana GarcÃ­a-Barr.	Cuatrecasas, J.	11168	18/12/40	0.56148	-76.83098	1999063002	16/12/20	Napo province	5550	0	0	2367	18107	360819	0.788714767	0.839711189	0.13908306	0.014346906	0	0	0.006118761	0.046807103	0.93272723
03/08/20	638	GBIF	PRESERVED_SPECIMEN	U	2517442053	SPECIES	Theobroma	speciosum	0	Theobroma speciosum Willd. ex Spreng.	Prance, G.T.; et al.	22901	14/10/74	-5.55619	-62.163949	2517442053	11/08/20	Madeira province	16671	0	0	1285	6578	1181019	0.83781587	0.858525217	0.124801698	0.013828509	0	0	0.001065901	0.005456417	0.979649173
03/08/20	2279	GBIF	PRESERVED_SPECIMEN	GH	1999244506	SPECIES	Herrania	kofanorum	0	Herrania kofanorum R.E.Schult.	Schultes, R.E.	3478	29/03/42	0.2517147	-76.5643542	1999244506	12/11/20	Napo province	13809	0	0	9030	48851	1133899	0.790527093	0.835181057	0.138432157	0.011454152	0	0	0.007490115	0.040520443	0.94053529
03/08/20	2298	GBIF	PRESERVED_SPECIMEN	A	1998842200	VARIETY	Herrania	pulcherrima	0	Herrania pulcherrima var. pacifica R.E.Schult.	Metcalf, R.D. & Cuatrecasas, J.	30173	25/02/42	6.997374	-76.256824	1998523514	14/12/20	Cauca province	0	0	0	0	0	0	0	0	0	NA	NA	NA	NA	NA	NA
03/08/20	2306	GBIF	PRESERVED_SPECIMEN	ECON	1998706251	SPECIES	Herrania	dugandii	0	Herrania dugandii GarcÃ­a-Barr.	Cuatrecasas, J.	10742	22/11/40	0.1329567	-75.8529505	1998706251	16/04/21	Napo province	19725	0	0	2737	20772	1162362	0.804302053	0.843321323	0.146837268	0.016361202	0	0	0.002270246	0.017229652	0.964138899
03/08/20	2312	GBIF	PRESERVED_SPECIMEN	GH	1998616212	VARIETY	Herrania	pulcherrima	0	Herrania pulcherrima var. pacifica R.E.Schult.	Cuatrecasas, J.	16010	05/02/44	0	0	1998616212	14/12/20	0	0	0	0	0	0	0	0	0	0	NA	NA	NA	NA	NA	NA
03/08/20	2327	GBIF	PRESERVED_SPECIMEN	RB	1990853561	SPECIES	Theobroma	sylvestre	0	Theobroma sylvestre Mart.	Souza, L.; et al.	372	25/10/18	-4.617778	-56.390833	0	13/04/21	Xingu-Tapajós province	49725	0	0	4476	19377	1132020	0.79779235	0.864919782	0.267745405	0.041245092	0	0	0.00371268	0.016072522	0.938969706
03/08/20	699	GBIF	PRESERVED_SPECIMEN	U	2517189345	SPECIES	Theobroma	speciosum	0	Theobroma speciosum Willd. ex Spreng.	Krukoff, B.A.	5295	05/08/33	-9.3333333	-69	1930116424	21/08/20	Rondônia province	60260	0	0	31055	108409	1005865	0.72156287	0.822488785	0.204461702	0.049983867	0	0	0.025759193	0.089922022	0.834334918
03/08/20	9753	GBIF	PRESERVED_SPECIMEN	BOTU	1275057218	SPECIES	Theobroma	speciosum	0	Theobroma speciosum Willd. ex Spreng.	Barbosa, V.D. & Muniz, E.	14	19/02/76	-7.516667	-63.166667	1042478756	20/08/20	Madeira province	40646	0	0	17328	90765	860067	0.736639093	0.822811872	0.218325676	0.040291196	0	0	0.017176742	0.0899727	0.852559362
03/08/20	14529	GBIF	PRESERVED_SPECIMEN	HUA	930998544	SPECIES	Herrania	purpurea	0	Herrania purpurea (Pittier) R.E.Schult.	Colorado, J. & Suarez, E.	769	26/06/11	7.529011	-74.817717	930998544	09/11/20	Magdalena province	16694	0	0	15398	179138	994365	0.73373853	0.811725318	0.166662128	0.013847105	0	0	0.012772117	0.148588871	0.824791908
03/08/20	2394	GBIF	PRESERVED_SPECIMEN	HERBAM	1978406127	SPECIES	Theobroma	speciosum	0	Theobroma speciosum Willd. ex Spreng.	Soares, C.R.A.; et al.	6879-INVENT	//	-9.652779	-56.533367	0	13/08/20	Madeira province	9555	0	0	6085	45252	663961	0.789473016	0.859275043	0.169999362	0.013181983	0	0	0.008394806	0.06242921	0.915994002
03/08/20	2395	GBIF	PRESERVED_SPECIMEN	HERBAM	1978406118	SPECIES	Theobroma	guianense	0	Theobroma guianense (Aubl.) J.F.Gmel.	Soares, C.R.A.; et al.	6885-INVENT	//	-9.652779	-56.533367	0	17/03/21	Madeira province	9555	0	0	6085	45252	663961	0.789473016	0.859275043	0.169999362	0.013181983	0	0	0.008394806	0.06242921	0.915994002
03/08/20	2425	GBIF	PRESERVED_SPECIMEN	CEPEC	1944966961	SPECIES	Theobroma	guianense	0	Theobroma guianense (Aubl.) J.F.Gmel.	Pinheiro, R.S.	1628	13/09/71	-14.51619	-39.2265538	0	24/03/21	South American Atlantic coast	160054	0	0	46549	142869	855438	0.613129469	0.755774111	0.331585295	0.132834818	0	0	0.038632761	0.118572342	0.70996008
03/08/20	2468	GBIF	PRESERVED_SPECIMEN	F	1944835693	SPECIES	Herrania	nitida	0	Herrania nitida (Poepp.) R.E.Schult.	Huamantupa, I.; et al.	s.n.	21/10/10	-3.2256667	-54.9258333	1944835693	26/04/21	Xingu-Tapajós province	83316	0	0	30126	95749	943729	0.718049184	0.834045589	0.247184686	0.072265205	0	0	0.026130174	0.083049127	0.818555494
03/08/20	2469	GBIF	PRESERVED_SPECIMEN	F	1944835049	SPECIES	Theobroma	guianense	0	Theobroma guianense (Aubl.) J.F.Gmel.	Huamantupa, I.	s.n.	18/10/09	-2.885028	-73.018667	0	24/03/21	Imerí province	67693	0	0	32925	93198	548023	0.683749921	0.845768034	0.296659663	0.091250258	0	0	0.044382946	0.125631033	0.738735763
03/08/20	2470	GBIF	PRESERVED_SPECIMEN	F	1944833103	SPECIES	Herrania	nitida	0	Herrania nitida (Poepp.) R.E.Schult.	Davila, N.	s.n.	13/10/07	-0.571306	-75.219222	0	26/04/21	Napo province	68005	0	0	62017	217714	857842	0.667285696	0.792847067	0.246093989	0.056408627	0	0	0.051441715	0.180588896	0.711560762
03/08/20	2471	GBIF	PRESERVED_SPECIMEN	F	1944831646	SPECIES	Herrania	nitida	0	Herrania nitida (Poepp.) R.E.Schult.	Paredes, M.A.R.	s.n.	28/10/12	-1.517611	-73.816167	0	26/04/21	Imerí province	17719	0	0	2377	9855	1175645	0.795503091	0.820995986	0.133421781	0.014697295	0	0	0.001971639	0.00817438	0.975156686
03/08/20	2472	GBIF	PRESERVED_SPECIMEN	F	1944830553	SPECIES	Herrania	cuatrecasana	0	Herrania cuatrecasana GarcÃ­a-Barr.	Huamantupa, I. & Cordero, Z.	s.n.	16/10/10	-2.610611	-71.48575	0	16/12/20	Imerí province	17769	0	0	1402	7714	1178705	0.814139584	0.837279081	0.147807471	0.014738842	0	0	0.001162916	0.006398527	0.977699715
03/08/20	2473	GBIF	PRESERVED_SPECIMEN	F	1944829683	SPECIES	Theobroma	guianense	0	Theobroma guianense (Aubl.) J.F.Gmel.	M. A. RÃ­os Paredes et al.	s.n.	15/09/13	-5.883944	-76.604361	1944829683	05/04/21	Ucayali province	77059	0	0	22421	69483	1036617	0.748682239	0.847305417	0.231618633	0.063918612	0	0	0.018597687	0.0576345	0.859849201
03/08/20	2474	GBIF	PRESERVED_SPECIMEN	F	1944820895	SPECIES	Theobroma	obovatum	0	Theobroma obovatum Klotzsch ex Bernoulli	Davila, N.	s.n.	11/10/07	-0.571306	-75.219222	0	23/09/20	Napo province	68005	0	0	62017	217714	857842	0.667285696	0.792847067	0.246093989	0.056408627	0	0	0.051441715	0.180588896	0.711560762
03/08/20	2480	GBIF	PRESERVED_SPECIMEN	MA	1936696513	SPECIES	Theobroma	cirmolinae	0	Theobroma cirmolinae Cuatrec.	PatiÃ±o, V.M.	242	05/11/63	3.6186	-76.9133	1228525628	21/10/20	Cauca province	0	0	0	0	0	0	0	0	0	NA	NA	NA	NA	NA	NA
03/08/20	2481	GBIF	PRESERVED_SPECIMEN	MA	1936696506	SPECIES	Theobroma	simiarum	0	Theobroma simiarum Donn.Sm.	PatiÃ±o, V.M.	241	04/11/63	3.6547	-76.6908	1228292660	21/10/20	Cauca province	0	0	0	0	0	0	0	0	0	NA	NA	NA	NA	NA	NA
03/08/20	832	GBIF	PRESERVED_SPECIMEN	U	2515610233	SPECIES	Theobroma	speciosum	0	Theobroma speciosum Willd. ex Spreng.	Prance, G.T.; et al.	6563	27/07/68	-10.263266	-65.291358	1928997460	11/08/20	Madeira province	27519	0	0	9259	80396	1088409	0.765516029	0.832834005	0.162714355	0.022826301	0	0	0.007680102	0.066686408	0.90280719
03/08/20	2492	GBIF	PRESERVED_SPECIMEN	MA	1936596987	SPECIES	Herrania	laciniifolia	0	Herrania laciniifolia Goudot ex Triana & Planch.	Mutis, J.C.B.	937	//	0	0	1936596987	09/11/20	0	0	0	0	0	0	0	0	0	0	NA	NA	NA	NA	NA	NA
03/08/20	2501	GBIF	PRESERVED_SPECIMEN	MA	1936574289	SPECIES	Herrania	nitida	0	Herrania nitida (Poepp.) R.E.Schult.	M.e.morales, G.L.O. & Palacios, E.	0555(3	16/11/95	4.1793	-73.6443	0	26/04/21	Pacific dominion	19292	0	0	17808	277862	398377	0.612739273	0.628385723	0.174726478	0.027044645	0	0	0.024964288	0.389523074	0.558467993
03/08/20	2519	GBIF	PRESERVED_SPECIMEN	MA	1936536727	SPECIES	Theobroma	guianense	0	Theobroma guianense (Aubl.) J.F.Gmel.	Cabrera, I.	2587	07/02/73	4.423056	-69.288055	1123880982	10/03/21	Imerí province	23657	0	0	23010	140447	1018480	0.772279323	0.861227483	0.205921001	0.019622692	0	0	0.019086027	0.116496101	0.84479518
03/08/20	2535	GBIF	PRESERVED_SPECIMEN	MA	1936309245	SPECIES	Theobroma	nemorale	0	Theobroma nemorale Cuatrec.	Cuatrecasas, J. & Willard, L.	26007	23/09/61	3.869426533	-76.52905107	1844907911	29/10/20	Cauca province	0	0	0	0	0	0	0	0	0	NA	NA	NA	NA	NA	NA
03/08/20	2542	GBIF	PRESERVED_SPECIMEN	MA	1936309111	SPECIES	Theobroma	simiarum	0	Theobroma simiarum Donn.Sm.	s.c.	26536	06/11/61	9.9919	-83.1126	1701728653	23/10/20	Pacific dominion	729285	0	0	2609	17814	454937	0.274036815	-0.037151702	0.439671197	0.60539412	0	0	0.002165783	0.014787759	0.377652337
03/08/20	2543	GBIF	PRESERVED_SPECIMEN	MA	1936309109	SPECIES	Theobroma	gileri	0	Theobroma gileri Cuatrec.	Cuatrecasas, J. & Willard, L.	26167	02/10/61	7.356869	-76.490227	1322501532	20/09/20	Cauca province	0	0	0	0	0	0	0	0	0	NA	NA	NA	NA	NA	NA
03/08/20	2549	GBIF	PRESERVED_SPECIMEN	MA	1936308609	SPECIES	Theobroma	nemorale	0	Theobroma nemorale Cuatrec.	Cuatrecasas, J. & Willard, L.	26051	24/09/61	4.1624	-77.1543	1228427176	29/10/20	Pacific dominion	0	0	0	0	0	0	0	0	0	NA	NA	NA	NA	NA	NA
03/08/20	2553	GBIF	PRESERVED_SPECIMEN	MA	1936308315	SPECIES	Theobroma	simiarum	0	Theobroma simiarum Donn.Sm.	s.c.	26515	//	9.8237676	-83.5444845	0	23/10/20	Puntarenas-Chiriquí province	350250	0	0	33738	101317	719380	0.488029121	0.739880562	0.463435559	0.290739903	0	0	0.028005661	0.084102483	0.597151953
03/08/20	2563	GBIF	PRESERVED_SPECIMEN	MA	1936238649	SPECIES	Herrania	lemniscata	0	Herrania lemniscata (Schomb.) R.E.Schult.	Angel Fernandez, D.C. & Perez, L.	26363	/3/2009	0	0	0	10/11/20	0	0	0	0	0	0	0	0	0	0	NA	NA	NA	NA	NA	NA
03/08/20	4126	GBIF	PRESERVED_SPECIMEN	FMB	1707550651	SPECIES	Herrania	albiflora	0	Herrania albiflora Goudot	Barbosa, C.E.	5786	22/05/89	8.4255659	-77.2926685	1707550804	07/06/21	Pacific dominion	685920	0	0	19840	63026	413807	0.261064666	-0.036093418	0.412508189	0.58001358	0	0	0.016776693	0.053294751	0.349914975
03/08/20	2594	GBIF	PRESERVED_SPECIMEN	COL	1934710638	SPECIES	Herrania	laciniifolia	0	Herrania laciniifolia Goudot ex Triana & Planch.	Garcia-Barriga, H.	8375	07/12/39	5.0672	-74.966698	1317810474	10/11/20	Magdalena province	56338	0	0	29071	209603	910552	0.67108794	0.735784054	0.200843708	0.046731654	0	0	0.024114025	0.173863022	0.755291299
03/08/20	2600	GBIF	PRESERVED_SPECIMEN	COL	1934685922	SPECIES	Theobroma	stipulatum	0	Theobroma stipulatum Cuatrec.	Cuatrecasas, J.	21339	28/05/46	4.1625	-77.2765	1934685922	20/10/20	Pacific dominion	0	0	0	0	0	0	0	0	0	NA	NA	NA	NA	NA	NA
03/08/20	3555	GBIF	PRESERVED_SPECIMEN	COAH	1891236948	SPECIES	Theobroma	guianense	0	Theobroma guianense (Aubl.) J.F.Gmel.	CastaÃ±o, N.; et al.	7918	17/03/16	1.60069	-75.87647	1891236948	28/12/20	Paramo province	60246	0	0	38315	208695	898313	0.645858117	0.691591322	0.200438716	0.049973083	0	0	0.031781673	0.173109129	0.745136114
03/08/20	1745	GBIF	PRESERVED_SPECIMEN	COAH	2313478281	SPECIES	Theobroma	guianense	0	Theobroma guianense (Aubl.) J.F.Gmel.	CÃ¡rdenas, D.; et al.	49705	24/02/18	-0.0425	-70.93972	2313478281	28/12/20	Imerí province	5221	0	0	378	4270	1195735	0.844714987	0.853611231	0.093965618	0.004330609	0	0	0.000313536	0.003541793	0.991814062
03/08/20	1744	GBIF	PRESERVED_SPECIMEN	COAH	2313480273	SPECIES	Theobroma	obovatum	0	Theobroma obovatum Klotzsch ex Bernoulli	CÃ¡rdenas, D.; et al.	50087	03/03/18	1.29072	-72.64336	2313480273	23/09/20	Imerí province	3506	0	0	984	16976	1184136	0.819544362	0.834019184	0.075025812	0.002908091	0	0	0.00081619	0.014080932	0.982194787
03/08/20	1743	GBIF	PRESERVED_SPECIMEN	COAH	2313488537	SPECIES	Theobroma	guianense	0	Theobroma guianense (Aubl.) J.F.Gmel.	CÃ¡rdenas, D.; et al.	50196	07/03/18	1.28544	-72.62242	2313488537	28/12/20	Imerí province	3506	0	0	984	16976	1184136	0.819544362	0.834019184	0.075025812	0.002908091	0	0	0.00081619	0.014080932	0.982194787
03/08/20	1742	GBIF	PRESERVED_SPECIMEN	COAH	2313488587	SPECIES	Theobroma	guianense	0	Theobroma guianense (Aubl.) J.F.Gmel.	CastaÃ±o, N.; et al.	10504	20/02/18	0.012611	-71.010056	2313488587	28/12/20	Imerí province	6286	0	0	2500	15542	1181275	0.834182984	0.85297358	0.104855022	0.005213988	0	0	0.002073651	0.012891474	0.979820886
03/08/20	12948	GBIF	PRESERVED_SPECIMEN	COAH	1147291794	SPECIES	Theobroma	guianense	0	Theobroma guianense (Aubl.) J.F.Gmel.	Defler, S.	583	24/09/86	-1.02	-69.58	1147291794	28/12/20	Imerí province	3772	0	0	213	1272	311455	0.81360715	0.831516325	0.129901177	0.011909874	0	0	0.000672535	0.004016267	0.983401324
03/08/20	14767	GBIF	PRESERVED_SPECIMEN	COAH	768730461	SPECIES	Theobroma	guianense	0	Theobroma guianense (Aubl.) J.F.Gmel.	Cordoba, M.; et al.	1977	05/02/96	2.2	-71.16	768730461	28/12/20	Imerí province	3664	0	0	1584	8136	1046555	0.826658385	0.83768481	0.071108588	0.003456803	0	0	0.001494426	0.007675913	0.987372858
03/08/20	14765	GBIF	PRESERVED_SPECIMEN	COAH	768731200	SPECIES	Theobroma	guianense	0	Theobroma guianense (Aubl.) J.F.Gmel.	Andel, T.R.; et al.	350	25/09/89	-0.56	-72.22	768731200	28/12/20	Imerí province	4659	0	0	243	683	378187	0.851557101	0.867432952	0.130050374	0.012140021	0	0	0.000633188	0.001779703	0.985447088
03/08/20	14762	GBIF	PRESERVED_SPECIMEN	COAH	768732089	SPECIES	Theobroma	obovatum	0	Theobroma obovatum Klotzsch ex Bernoulli	SÃ¡nchez, M.; et al.	208	05/05/88	-0.85	-71.81	768732089	25/09/20	Imerí province	9796	0	0	852	5264	1056454	0.820015111	0.835764468	0.126346866	0.009134941	0	0	0.000794505	0.004908772	0.985161782
03/08/20	12947	GBIF	PRESERVED_SPECIMEN	COAH	1147292116	SPECIES	Theobroma	guianense	0	Theobroma guianense (Aubl.) J.F.Gmel.	Sanchez, M.; et al.	118	25/04/88	-0.58	-72.39	1147292116	28/12/20	Imerí province	12200	0	0	901	26466	1166027	0.799760414	0.824206471	0.120056907	0.010119493	0	0	0.000747349	0.021952664	0.967180494
03/08/20	12946	GBIF	PRESERVED_SPECIMEN	COAH	1147292146	SPECIES	Theobroma	guianense	0	Theobroma guianense (Aubl.) J.F.Gmel.	Montenegro, O.; et al.	6	02/04/96	-0.54	-72.33	1147292146	28/12/20	Imerí province	12200	0	0	901	26466	1166027	0.799760414	0.824206471	0.120056907	0.010119493	0	0	0.000747349	0.021952664	0.967180494
03/08/20	5055	GBIF	PRESERVED_SPECIMEN	COAH	1324649984	SPECIES	Theobroma	glaucum	0	Theobroma glaucum H.Karst.	SÃ¡nchez, M.; et al.	611	06/06/88	-0.74	-72.05	1324649984	04/09/20	Imerí province	62231	0	0	23542	44120	924092	0.755338907	0.836630523	0.226952747	0.059043535	0	0	0.022336181	0.041860178	0.876760106
03/08/20	14760	GBIF	PRESERVED_SPECIMEN	COAH	768732544	SPECIES	Theobroma	guianense	0	Theobroma guianense (Aubl.) J.F.Gmel.	Urrego, L.E.; et al.	1540	01/03/90	-0.86	-71.81	768732544	28/12/20	Imerí province	9796	0	0	852	5264	1056454	0.820015111	0.835764468	0.126346866	0.009134941	0	0	0.000794505	0.004908772	0.985161782
03/08/20	4209	GBIF	PRESERVED_SPECIMEN	FMB	1707505776	SPECIES	Theobroma	obovatum	0	Theobroma obovatum Klotzsch ex Bernoulli	Rudas, A.; et al.	1593	13/03/91	-3.783333	-70.25	1707505776	05/03/21	Imerí province	51884	0	0	20991	72181	650100	0.692628188	0.798938602	0.245448333	0.065250089	0	0	0.026398593	0.090775898	0.817575419
03/08/20	14758	GBIF	PRESERVED_SPECIMEN	COAH	768732606	SPECIES	Theobroma	obovatum	0	Theobroma obovatum Klotzsch ex Bernoulli	Urrego, L.E.	1649	01/03/90	-0.86	-71.81	768732606	25/09/20	Imerí province	9796	0	0	852	5264	1056454	0.820015111	0.835764468	0.126346866	0.009134941	0	0	0.000794505	0.004908772	0.985161782
03/08/20	14757	GBIF	PRESERVED_SPECIMEN	COAH	768732642	SPECIES	Theobroma	guianense	0	Theobroma guianense (Aubl.) J.F.Gmel.	Urrego, L.E.	1471	01/03/90	-0.74	-72.04	768732642	28/12/20	Imerí province	9796	0	0	852	5264	1056454	0.820015111	0.835764468	0.126346866	0.009134941	0	0	0.000794505	0.004908772	0.985161782
03/08/20	5670	GBIF	PRESERVED_SPECIMEN	US	1320692276	SPECIES	Theobroma	glaucum	Theobroma calodesmis	Theobroma glaucum H.Karst.	Garcia-Barriga, H.	14380	03/09/52	-0.43	-70.25	1320692276	07/09/20	Imerí province	18285	0	0	15843	57006	1114465	0.799562667	0.848979592	0.161318354	0.015166735	0	0	0.013141185	0.047284379	0.924407701
03/08/20	14755	GBIF	PRESERVED_SPECIMEN	COAH	768733269	SPECIES	Herrania	nitida	0	Herrania nitida (Poepp.) R.E.Schult.	Urrego, L.E.	387	01/03/89	-0.82	-71.8	768733269	07/04/21	Imerí province	9796	0	0	852	5264	1056454	0.820015111	0.835764468	0.126346866	0.009134941	0	0	0.000794505	0.004908772	0.985161782
03/08/20	2736	GBIF	PRESERVED_SPECIMEN	COAH	1932874181	SPECIES	Theobroma	guianense	0	Theobroma guianense (Aubl.) J.F.Gmel.	Urrego, L.E.	375	01/03/89	-0.82	-71.8	1932874181	28/12/20	Imerí province	9796	0	0	852	5264	1056454	0.820015111	0.835764468	0.126346866	0.009134941	0	0	0.000794505	0.004908772	0.985161782
03/08/20	14753	GBIF	PRESERVED_SPECIMEN	COAH	768733274	SPECIES	Theobroma	obovatum	0	Theobroma obovatum Klotzsch ex Bernoulli	Urrego, L.E.	384	01/03/90	-0.82	-71.8	768733274	25/09/20	Imerí province	9796	0	0	852	5264	1056454	0.820015111	0.835764468	0.126346866	0.009134941	0	0	0.000794505	0.004908772	0.985161782
03/08/20	14751	GBIF	PRESERVED_SPECIMEN	COAH	768733331	SPECIES	Theobroma	obovatum	0	Theobroma obovatum Klotzsch ex Bernoulli	Urrego, L.E.	453	01/03/89	-0.81	-71.82	768733331	25/09/20	Imerí province	9796	0	0	852	5264	1056454	0.820015111	0.835764468	0.126346866	0.009134941	0	0	0.000794505	0.004908772	0.985161782
03/08/20	14750	GBIF	PRESERVED_SPECIMEN	COAH	768733357	SPECIES	Theobroma	guianense	0	Theobroma guianense (Aubl.) J.F.Gmel.	Urrego, L.E.	1102	01/10/89	-0.86	-71.8	0	28/12/20	Imerí province	9796	0	0	852	5264	1056454	0.820015111	0.835764468	0.126346866	0.009134941	0	0	0.000794505	0.004908772	0.985161782
03/08/20	14749	GBIF	PRESERVED_SPECIMEN	COAH	768733358	SPECIES	Herrania	nitida	0	Herrania nitida (Poepp.) R.E.Schult.	Urrego, L.E.	461	01/05/89	-0.81	-71.82	768733358	07/04/21	Imerí province	9796	0	0	852	5264	1056454	0.820015111	0.835764468	0.126346866	0.009134941	0	0	0.000794505	0.004908772	0.985161782
03/08/20	3568	GBIF	PRESERVED_SPECIMEN	COL	1891005629	SPECIES	Theobroma	glaucum	0	Theobroma glaucum H.Karst.	Cogollo, A.	1035	03/12/83	5.93631	-74.849556	1891005629	08/03/21	Magdalena province	31946	0	0	13044	275986	884611	0.685555121	0.736332417	0.187832974	0.026498295	0	0	0.010819626	0.228922508	0.733759571
03/08/20	14747	GBIF	PRESERVED_SPECIMEN	COAH	768733643	SPECIES	Theobroma	obovatum	0	Theobroma obovatum Klotzsch ex Bernoulli	Urrego, L.E.	1964	01/08/90	-0.73	-72.03	768733643	25/09/20	Imerí province	9796	0	0	852	5264	1056454	0.820015111	0.835764468	0.126346866	0.009134941	0	0	0.000794505	0.004908772	0.985161782
03/08/20	14746	GBIF	PRESERVED_SPECIMEN	COAH	768733644	SPECIES	Theobroma	guianense	0	Theobroma guianense (Aubl.) J.F.Gmel.	Urrego, L.E.; et al.	1900	01/08/90	-0.73	-72.03	768733644	28/12/20	Imerí province	9796	0	0	852	5264	1056454	0.820015111	0.835764468	0.126346866	0.009134941	0	0	0.000794505	0.004908772	0.985161782
03/08/20	14744	GBIF	PRESERVED_SPECIMEN	COAH	768733809	SPECIES	Theobroma	obovatum	0	Theobroma obovatum Klotzsch ex Bernoulli	Trujillo, W.C. & RodrÃ­guez, O.	1859	05/02/11	2.3230556	-73.0241667	1930127941	24/09/20	Imerí province	6665	0	0	1536	71873	1125524	0.7592053	0.802800477	0.108903987	0.005528377	0	0	0.001274057	0.059616058	0.933581509
03/08/20	14743	GBIF	PRESERVED_SPECIMEN	COAH	768734126	SPECIES	Herrania	nitida	0	Herrania nitida (Poepp.) R.E.Schult.	Cordoba, M.; et al.	1703	31/01/96	2.178056	-71.190278	768734126	07/04/21	Imerí province	3664	0	0	1584	8136	1046555	0.826658385	0.83768481	0.071108588	0.003456803	0	0	0.001494426	0.007675913	0.987372858
03/08/20	14742	GBIF	PRESERVED_SPECIMEN	COAH	768734257	SPECIES	Herrania	nitida	0	Herrania nitida (Poepp.) R.E.Schult.	Urrego, L.E.	1840	01/06/90	-0.85	-71.81	768734257	07/04/21	Imerí province	9796	0	0	852	5264	1056454	0.820015111	0.835764468	0.126346866	0.009134941	0	0	0.000794505	0.004908772	0.985161782
03/08/20	2734	GBIF	PRESERVED_SPECIMEN	COAH	1932874555	SPECIES	Theobroma	guianense	0	Theobroma guianense (Aubl.) J.F.Gmel.	Londono, C.; et al.	830	12/09/89	-0.56	-72.13	1932874555	28/12/20	Imerí province	62231	0	0	23542	44120	924092	0.755338907	0.836630523	0.226952747	0.059043535	0	0	0.022336181	0.041860178	0.876760106
03/08/20	14795	GBIF	PRESERVED_SPECIMEN	COAH	768723864	SPECIES	Herrania	nitida	0	Herrania nitida (Poepp.) R.E.Schult.	Palacios, P.A.; et al.	272	24/05/84	-0.69	-72.12	768723864	07/04/21	Imerí province	62231	0	0	23542	44120	924092	0.755338907	0.836630523	0.226952747	0.059043535	0	0	0.022336181	0.041860178	0.876760106
03/08/20	2740	GBIF	PRESERVED_SPECIMEN	HUC	1931789412	SPECIES	Herrania	albiflora	0	Herrania albiflora Goudot	Varilla, J.; et al.	157	23/07/17	8.55255	-75.201119	0	09/11/20	Magdalena province	42301	0	0	16833	497002	527225	0.565979959	0.595200479	0.208991079	0.03904608	0	0	0.015537757	0.458759361	0.486656802
03/08/20	848	GBIF	PRESERVED_SPECIMEN	U	2515591867	SPECIES	Theobroma	speciosum	0	Theobroma speciosum Willd. ex Spreng.	Prance, G.T.; et al.	25340	13/11/77	-8.477967	-55.129051	1930309198	11/08/20	Xingu-Tapajós province	63261	0	0	26639	98174	1017491	0.744952686	0.843663931	0.215705811	0.052474151	0	0	0.022096693	0.081434016	0.843995139
03/08/20	3148	GBIF	PRESERVED_SPECIMEN	NY	1928905488	SPECIES	Theobroma	velutinum	0	Theobroma velutinum Benoist	Mori, S.A.	24183	22/09/95	3.62	-53.2	694272926	07/08/20	Guianan Lowlands province	34723	0	0	27180	66151	922526	0.795097778	0.874870181	0.194142331	0.033051267	0	0	0.025871423	0.062966171	0.878111139
03/08/20	870	GBIF	PRESERVED_SPECIMEN	U	2515550434	SPECIES	Theobroma	speciosum	0	Theobroma speciosum Willd. ex Spreng.	Prance, G.T. & Ramos, J.F.	7189	17/08/68	-9.253256	-63.026951	1928558837	12/08/20	Madeira province	19612	0	0	15444	124463	1046075	0.743880199	0.797059178	0.178948863	0.0162675	0	0	0.012810283	0.103237906	0.867684312
03/08/20	3044	GBIF	PRESERVED_SPECIMEN	NY	1929496302	SPECIES	Herrania	mariae	0	Herrania mariae (Mart.) Decne. ex Goudot	Warush, A.	5	19/08/85	-2.78	-77.6	1929496302	04/05/21	Napo province	3489	0	0	3006	36113	1162994	0.828704958	0.850728154	0.094324763	0.00289399	0	0	0.00249336	0.02995433	0.96465832
03/08/20	886	GBIF	PRESERVED_SPECIMEN	U	2515538105	SPECIES	Theobroma	speciosum	0	Theobroma speciosum Willd. ex Spreng.	Prance, G.T.; et al.	7613	27/09/68	-9.07	-68.62	2515538105	12/08/20	Rondônia province	18871	0	0	10134	42613	1071969	0.802087929	0.847659826	0.138518048	0.016501587	0	0	0.008861591	0.037262578	0.937374244
03/08/20	2889	GBIF	PRESERVED_SPECIMEN	NY	1930437968	SPECIES	Theobroma	speciosum	0	Theobroma speciosum Willd. ex Spreng.	BalÃ©e, W.L.	2440	12/06/86	-7.204003	-52.585459	1930437968	12/04/21	Xingu-Tapajós province	31112	0	0	6756	42794	1124924	0.799894495	0.873896599	0.209796984	0.025806537	0	0	0.005603914	0.035496431	0.933093118
03/08/20	912	GBIF	PRESERVED_SPECIMEN	U	2515443880	SPECIES	Theobroma	speciosum	0	Theobroma speciosum Willd. ex Spreng.	Maas, P.J.M.; et al.	P13231	21/05/71	-8.2720662	-72.7458528	1320379765	12/08/20	Rondônia province	4348	0	0	2996	15879	1182379	0.860628719	0.875384629	0.083371919	0.003606497	0	0	0.002485066	0.013171013	0.980737424
03/08/20	3155	GBIF	PRESERVED_SPECIMEN	NY	1928850319	SPECIES	Theobroma	speciosum	0	Theobroma speciosum Willd. ex Spreng.	BalÃ©e, W.L.	3378	18/06/87	-3.12	-46.08	1928850319	12/04/21	Pará province	36503	0	0	32718	120128	1016249	0.757025963	0.85561344	0.19778552	0.03027792	0	0	0.027138399	0.099641837	0.842941843
03/08/20	3140	GBIF	PRESERVED_SPECIMEN	NY	1928953294	SPECIES	Theobroma	speciosum	0	Theobroma speciosum Willd. ex Spreng.	BalÃ©e, W.L.	2229	08/05/86	-3.5	-45.25	1928953294	12/04/21	Pará province	45992	0	0	7224	110841	1017595	0.715253987	0.765435934	0.210175038	0.038921781	0	0	0.006113475	0.093801728	0.861163016
03/08/20	741	GBIF	PRESERVED_SPECIMEN	L	2517021692	SPECIES	Theobroma	velutinum	0	Theobroma velutinum Benoist	Mori, S.A.; et al.	24183	22/09/95	3.616667	-53.2	694272926	07/08/20	Guianan Lowlands province	34723	0	0	27180	66151	922526	0.795097778	0.874870181	0.194142331	0.033051267	0	0	0.025871423	0.062966171	0.878111139
03/08/20	925	GBIF	PRESERVED_SPECIMEN	U	2515420902	SPECIES	Theobroma	speciosum	0	Theobroma speciosum Willd. ex Spreng.	Prance, G.T.; et al.	24725	31/10/77	-3.262909	-52.365972	1931012064	12/08/20	Xingu-Tapajós province	65347	0	0	5757	176970	773917	0.688004111	0.791157126	0.288686112	0.063940876	0	0	0.005633122	0.173161995	0.757264007
03/08/20	2969	GBIF	PRESERVED_SPECIMEN	NY	1929960833	SPECIES	Theobroma	speciosum	0	Theobroma speciosum Willd. ex Spreng.	BalÃ©e, W.L.	1025	17/09/85	-1.1986286	-46.0203341	1265518246	12/04/21	0	158835	0	0	16625	148361	881753	0.627887892	0.767441869	0.3537932	0.131750519	0	0	0.013790112	0.123062541	0.731396828
03/08/20	1203	GBIF	PRESERVED_SPECIMEN	ESA	2459905069	SPECIES	Theobroma	speciosum	0	Theobroma speciosum Willd. ex Spreng.	Nave, A.G.; et al.	1814	10/08/97	-11.6619444	-57.2686111	2459905069	12/08/20	Xingu-Tapajós province	9180	0	0	12135	70612	1113670	0.780850371	0.827655315	0.141517949	0.007614485	0	0	0.010065553	0.058570152	0.92374981
03/08/20	1204	GBIF	PRESERVED_SPECIMEN	ESA	2459904753	SPECIES	Theobroma	speciosum	0	Theobroma speciosum Willd. ex Spreng.	Souza, V.C.; et al.	18555	09/07/97	-10.2833333	-59.05	2459904753	12/08/20	Madeira province	14897	0	0	14361	57119	605161	0.766150607	0.847748071	0.175303492	0.021541839	0	0	0.020766755	0.082597052	0.875094355
03/08/20	1205	GBIF	PRESERVED_SPECIMEN	ESA	2459904188	SPECIES	Theobroma	speciosum	0	Theobroma speciosum Willd. ex Spreng.	Ãrbocz, G.F.; et al.	3988	07/06/97	-9.8787	-56.098	2459904188	12/08/20	Madeira province	9555	0	0	6085	45252	663961	0.789473016	0.859275043	0.169999362	0.013181983	0	0	0.008394806	0.06242921	0.915994002
03/08/20	1207	GBIF	PRESERVED_SPECIMEN	ESA	2459903277	SPECIES	Theobroma	speciosum	0	Theobroma speciosum Willd. ex Spreng.	Assis, M.C.; et al.	490	04/07/97	-10.168333	-59.457778	2459903277	12/08/20	Madeira province	2112	0	0	1806	20267	781935	0.834944039	0.873714089	0.099332484	0.002619957	0	0	0.002240361	0.025141418	0.969998263
03/08/20	2784	GBIF	PRESERVED_SPECIMEN	NY	1931101726	SPECIES	Theobroma	speciosum	0	Theobroma speciosum Willd. ex Spreng.	BalÃ©e, W.L. & Gely, A.	911	22/04/85	-3.166032	-45.938086	1931101726	13/08/20	Pará province	36503	0	0	32718	120128	1016249	0.757025963	0.85561344	0.19778552	0.03027792	0	0	0.027138399	0.099641837	0.842941843
03/08/20	3231	GBIF	PRESERVED_SPECIMEN	NY	1928360652	SPECIES	Theobroma	speciosum	0	Theobroma speciosum Willd. ex Spreng.	BalÃ©e, W.L. & Ribeiro, B.	2797	04/11/86	-2.7166667	-46.4333333	1928360652	17/08/20	Pará province	36503	0	0	32718	120128	1016249	0.757025963	0.85561344	0.19778552	0.03027792	0	0	0.027138399	0.099641837	0.842941843
03/08/20	2872	GBIF	PRESERVED_SPECIMEN	NY	1930507637	SPECIES	Theobroma	speciosum	0	Theobroma speciosum Willd. ex Spreng.	BalÃ©e, W.L. & Ribeiro, B.	2889	05/11/86	-2.72	-46.43	1930507637	14/08/20	Pará province	36503	0	0	32718	120128	1016249	0.757025963	0.85561344	0.19778552	0.03027792	0	0	0.027138399	0.099641837	0.842941843
03/08/20	3170	GBIF	PRESERVED_SPECIMEN	NY	1928746028	SPECIES	Theobroma	speciosum	0	Theobroma speciosum Willd. ex Spreng.	W. L. BalÃ©e	660	11/02/85	-3.140453	-45.963533	1928746028	17/08/20	Pará province	36503	0	0	32718	120128	1016249	0.757025963	0.85561344	0.19778552	0.03027792	0	0	0.027138399	0.099641837	0.842941843
03/08/20	1210	GBIF	PRESERVED_SPECIMEN	ESA	2459903031	SPECIES	Theobroma	speciosum	0	Theobroma speciosum Willd. ex Spreng.	Souza, V.C.; et al.	18682	10/07/97	-10.366667	-58.833333	2459903031	12/08/20	Madeira province	3063	0	0	2587	39714	651244	0.795616447	0.848648667	0.115403433	0.004397021	0	0	0.00371371	0.057010543	0.934878727
03/08/20	1234	GBIF	PRESERVED_SPECIMEN	HST	2452735946	SPECIES	Theobroma	speciosum	0	Theobroma speciosum Willd. ex Spreng.	Tavares, S.	1102	23/10/62	-2.897	-45.6352	1317661770	12/08/20	Pará province	45992	0	0	7224	110841	1017595	0.715253987	0.765435934	0.210175038	0.038921781	0	0	0.006113475	0.093801728	0.861163016
03/08/20	1381	GBIF	PRESERVED_SPECIMEN	RB	2447666792	SPECIES	Theobroma	speciosum	0	Theobroma speciosum Willd. ex Spreng.	Giacomin, L.L. & Gouvea, Y.F.	2229	30/07/14	-9.540833	-65.033611	1042717211	12/04/21	Madeira province	26109	0	0	8105	67946	1103426	0.765390724	0.822417706	0.173971524	0.021656688	0	0	0.006722872	0.056359314	0.915261126
03/08/20	1588	GBIF	PRESERVED_SPECIMEN	RB	2423617632	SPECIES	Theobroma	speciosum	0	Theobroma speciosum Willd. ex Spreng.	Silva, I.M.; et al.	335	19/10/17	-11.713333	-64.866111	0	12/04/21	Madeira province	18569	0	0	1689	34566	1150753	0.821960545	0.865185738	0.161892629	0.015402583	0	0	0.001400989	0.028671748	0.95452468
03/08/20	3060	GBIF	PRESERVED_SPECIMEN	NY	1929377725	SPECIES	Theobroma	microcarpum	0	Theobroma microcarpum Mart.	Daly, D.C.; et al.	9427	10/03/97	-9.4111	-68.1239	1930438043	14/09/20	Rondônia province	52725	0	0	33310	104879	1014678	0.753295128	0.854032964	0.213709128	0.043733701	0	0	0.027629579	0.086993776	0.841642944
03/08/20	3230	GBIF	PRESERVED_SPECIMEN	NY	1928364105	SPECIES	Theobroma	speciosum	0	Theobroma speciosum Willd. ex Spreng.	Daly, D.C.; et al.	7999	02/11/93	-9.75	-67.6333333	1928364105	19/08/20	Madeira province	3456	0	0	3225	32352	1166570	0.822676127	0.87308532	0.107555689	0.002866615	0	0	0.00267501	0.026834704	0.96762367
03/08/20	1638	GBIF	PRESERVED_SPECIMEN	US	2397715434	SPECIES	Theobroma	speciosum	Theobroma speciosa Willd.	Theobroma speciosum Willd. ex Spreng.	Amaral, I.L.; et al.	29	12/10/82	-3.3008	-64.7806	1927849168	13/08/20	Imerí province	95010	0	0	15629	47113	1047731	0.733660523	0.836932003	0.274162397	0.078814882	0	0	0.012964928	0.03908226	0.869137931
03/08/20	3129	GBIF	PRESERVED_SPECIMEN	NY	1929019516	SPECIES	Theobroma	obovatum	0	Theobroma obovatum Klotzsch ex Bernoulli	Daly, D.C.; et al.	8181	04/04/94	-9.2	-68.73	685425295	05/10/20	Rondônia province	52725	0	0	33310	104879	1014678	0.753295128	0.854032964	0.213709128	0.043733701	0	0	0.027629579	0.086993776	0.841642944
03/08/20	2957	GBIF	PRESERVED_SPECIMEN	NY	1930048954	SPECIES	Theobroma	speciosum	0	Theobroma speciosum Willd. ex Spreng.	Mori, S.A.; et al.	11332	30/01/79	-14.771874	-39.227366	1930048954	04/09/20	South American Atlantic coast	147382	0	0	25484	176828	855630	0.644052284	0.763287425	0.315930606	0.122275836	0	0	0.021142863	0.146705782	0.709875519
03/08/20	1689	GBIF	PRESERVED_SPECIMEN	MG	2365702080	SPECIES	Theobroma	speciosum	0	Theobroma speciosum Willd. ex Spreng.	Rocha, S.F.R.	s.n.	09/01/11	-1.3973898	-48.3198725	2365702080	13/08/20	Pará province	340265	0	0	27035	185859	652409	0.410442507	0.658553213	0.55760358	0.282244552	0	0	0.022425114	0.154167164	0.54116317
03/08/20	2998	GBIF	PRESERVED_SPECIMEN	NY	1929797276	SPECIES	Theobroma	glaucum	0	Theobroma glaucum H.Karst.	Werff, H.H.	10258	24/08/88	-4.12472	-73.46416	1228611800	04/09/20	Napo province	72433	0	0	27264	104842	1001049	0.705524528	0.806079984	0.23019889	0.060081056	0	0	0.022614691	0.086963374	0.830340879
03/08/20	3294	GBIF	PRESERVED_SPECIMEN	NY	1927990115	SPECIES	Theobroma	glaucum	0	Theobroma glaucum H.Karst.	Marulanda, O.	1858	30/01/90	2.18333	-74.05	0	04/08/20	Imerí province	7424	0	0	4906	98025	1062972	0.763648751	0.808135986	0.117926711	0.006327307	0	0	0.004181273	0.083544485	0.905946936
03/08/20	1691	GBIF	PRESERVED_SPECIMEN	MG	2365699073	SPECIES	Theobroma	speciosum	0	Theobroma speciosum Willd. ex Spreng.	Santos, R.S.	243	03/08/17	-6.399444	-50.288889	2365699073	03/09/20	Xingu-Tapajós province	26235	0	0	9226	31565	821447	0.809373608	0.873849273	0.174240312	0.029528191	0	0	0.010384108	0.035527247	0.924560454
03/08/20	1697	GBIF	PRESERVED_SPECIMEN	MG	2365695574	SPECIES	Theobroma	speciosum	0	Theobroma speciosum Willd. ex Spreng.	Zanzini, L.P.; et al.	169	27/07/16	-7.4447953	-57.3030347	2365695574	13/08/20	Xingu-Tapajós province	13043	0	0	5256	32076	1155210	0.845615929	0.882473528	0.146840802	0.010818814	0	0	0.004359709	0.02660617	0.958215306
03/08/20	3032	GBIF	PRESERVED_SPECIMEN	NY	1929601904	SPECIES	Herrania	mariae	0	Herrania mariae (Mart.) Decne. ex Goudot	Cid-Ferreira, C.A.; et al.	10530	01/11/91	-8.3	-72.77	1929601904	05/05/21	Rondônia province	4348	0	0	2996	15879	1182379	0.860628719	0.875384629	0.083371919	0.003606497	0	0	0.002485066	0.013171013	0.980737424
03/08/20	3056	GBIF	PRESERVED_SPECIMEN	NY	1929399228	SPECIES	Herrania	mariae	0	Herrania mariae (Mart.) Decne. ex Goudot	Ehringhaus, C.; et al.	331	05/12/95	-8.42	-71.33	1929399228	04/05/21	Rondônia province	810	0	0	2417	16733	215021	0.790154798	0.84406966	0.128092185	0.003447087	0	0	0.010285938	0.071210013	0.915056962
03/08/20	3182	GBIF	PRESERVED_SPECIMEN	NY	1928697148	SPECIES	Theobroma	speciosum	Theobroma speciosa	Theobroma speciosum Willd. ex Spreng.	Ehringhaus, C.; et al.	1060	03/09/99	-10.5644444	-68.3030556	1928697148	17/08/20	Rondônia province	1035	0	0	664	15225	1188676	0.852567884	0.881390572	0.077746108	0.000858494	0	0	0.000550763	0.012628567	0.985962177
03/08/20	2993	GBIF	PRESERVED_SPECIMEN	NY	1929829008	SPECIES	Theobroma	obovatum	0	Theobroma obovatum Klotzsch ex Bernoulli	Delprete, P.G.; et al.	7856	16/11/01	-8.1833333	-73.0666667	1929829008	25/09/20	Rondônia province	33664	0	0	21739	80649	1069544	0.782122209	0.860098273	0.183838181	0.027923119	0	0	0.018031745	0.066895544	0.887149592
03/08/20	2761	GBIF	PRESERVED_SPECIMEN	NY	1931255852	SPECIES	Theobroma	obovatum	0	Theobroma obovatum Klotzsch ex Bernoulli	Delprete, P.G.	7896	17/11/01	-8.1333333	-73.8166667	1931255852	24/09/20	Rondônia province	17172	0	0	8391	38487	780481	0.77832112	0.822305083	0.141565419	0.020333179	0	0	0.009935692	0.045572039	0.924159089
03/08/20	2328	GBIF	PRESERVED_SPECIMEN	RB	1990853495	SPECIES	Theobroma	speciosum	0	Theobroma speciosum Willd. ex Spreng.	Souza, L.; et al.	219	17/10/18	-2.743889	-55.480556	0	12/04/21	Madeira province	168520	0	0	34126	85916	917027	0.651725835	0.840688884	0.372873335	0.139782297	0	0	0.028306496	0.071264751	0.760646456
03/08/20	3302	GBIF	PRESERVED_SPECIMEN	NY	1927956110	SPECIES	Herrania	mariae	0	Herrania mariae (Mart.) Decne. ex Goudot	Daly, D.C.	6827	01/06/91	-10.85	-68.8	1927956110	04/05/21	Rondônia province	1035	0	0	664	15225	1188676	0.852567884	0.881390572	0.077746108	0.000858494	0	0	0.000550763	0.012628567	0.985962177
03/08/20	3073	GBIF	PRESERVED_SPECIMEN	NY	1929316530	SPECIES	Herrania	mariae	0	Herrania mariae (Mart.) Decne. ex Goudot	Daly, D.C.; et al.	11220	30/10/01	-9.3781	-69.9333	1929316530	05/05/21	Rondônia province	5615	0	0	1214	4616	1194152	0.852470901	0.86015749	0.071615151	0.004657444	0	0	0.00100697	0.003828808	0.990506778
03/08/20	2911	GBIF	PRESERVED_SPECIMEN	NY	1930294397	SPECIES	Herrania	mariae	0	Herrania mariae (Mart.) Decne. ex Goudot	Daly, D.C.; et al.	7698	01/04/93	-9.08	-72.68	1930294397	04/05/21	Rondônia province	2511	0	0	2685	15154	1185254	0.862828758	0.875047922	0.072710606	0.002082773	0	0	0.002227099	0.012569633	0.983120494
03/08/20	2341	GBIF	PRESERVED_SPECIMEN	MICH	1989487826	SPECIES	Theobroma	speciosum	0	Theobroma speciosum Willd. ex Spreng.	Cid-Ferreira, C.A.; Nelson, B.W.	2800	08/10/80	-9.9782224	-67.8113845	1929394280	13/08/20	Rondônia province	10394	0	0	15739	118026	1061443	0.771113074	0.841849774	0.154075544	0.008621419	0	0	0.013054889	0.09789798	0.880425713
03/08/20	2350	GBIF	PRESERVED_SPECIMEN	MICH	1988597416	SPECIES	Theobroma	speciosum	0	Theobroma speciosum Willd. ex Spreng.	Cid-Ferreira, C.A.; Nelson, B.W.	2808	09/10/80	-10.092884	-67.514414	1318580275	13/08/20	Rondônia province	10394	0	0	15739	118026	1061443	0.771113074	0.841849774	0.154075544	0.008621419	0	0	0.013054889	0.09789798	0.880425713
03/08/20	2897	GBIF	PRESERVED_SPECIMEN	NY	1930384742	SPECIES	Herrania	mariae	0	Herrania mariae (Mart.) Decne. ex Goudot	Daly, D.C.; et al.	8666	21/11/95	-8.4494	-71.3492	1930384742	05/05/21	Rondônia province	810	0	0	2417	16733	215021	0.790154798	0.84406966	0.128092185	0.003447087	0	0	0.010285938	0.071210013	0.915056962
03/08/20	3057	GBIF	PRESERVED_SPECIMEN	NY	1929398885	SPECIES	Herrania	nitida	0	Herrania nitida (Poepp.) R.E.Schult.	Daly, D.C.; et al.	8743	24/11/95	-8.3839	-71.2878	1929398885	26/04/21	Rondônia province	810	0	0	2417	16733	215021	0.790154798	0.84406966	0.128092185	0.003447087	0	0	0.010285938	0.071210013	0.915056962
03/08/20	2879	GBIF	PRESERVED_SPECIMEN	NY	1930481893	SPECIES	Herrania	nitida	0	Herrania nitida (Poepp.) R.E.Schult.	Cid-Ferreira, C.A. & Souza, A.	2990	21/10/80	-9.94848	-67.867323	1930481893	04/05/21	Rondônia province	3456	0	0	3225	32352	1166570	0.822676127	0.87308532	0.107555689	0.002866615	0	0	0.00267501	0.026834704	0.96762367
03/08/20	2427	GBIF	PRESERVED_SPECIMEN	CEPEC	1944966898	SPECIES	Theobroma	speciosum	0	Theobroma speciosum Willd. ex Spreng.	Santos, T.S.	672	10/04/70	-14.51619	-39.2265538	1944966898	13/08/20	South American Atlantic coast	160054	0	0	46549	142869	855438	0.613129469	0.755774111	0.331585295	0.132834818	0	0	0.038632761	0.118572342	0.70996008
03/08/20	3037	GBIF	PRESERVED_SPECIMEN	NY	1929561378	SPECIES	Theobroma	obovatum	0	Theobroma obovatum Klotzsch ex Bernoulli	Nelson, B.W.	571	03/10/80	-9.0833333	-68.6666667	1929561378	25/09/20	Rondônia province	18871	0	0	10134	42613	1071969	0.802087929	0.847659826	0.138518048	0.016501587	0	0	0.008861591	0.037262578	0.937374244
03/08/20	3176	GBIF	PRESERVED_SPECIMEN	NY	1928725566	SPECIES	Theobroma	obovatum	0	Theobroma obovatum Klotzsch ex Bernoulli	Ferreira, C.A.C.	2681	02/10/80	-9.0693008	-68.6584285	1928725566	02/10/20	Rondônia province	18871	0	0	10134	42613	1071969	0.802087929	0.847659826	0.138518048	0.016501587	0	0	0.008861591	0.037262578	0.937374244
03/08/20	2905	GBIF	PRESERVED_SPECIMEN	NY	1930341939	SPECIES	Theobroma	obovatum	0	Theobroma obovatum Klotzsch ex Bernoulli	Marinho, L.R.	241	02/02/76	-7.634555	-72.6716458	1930341939	24/09/20	Rondônia province	16971	0	0	10218	47685	1130723	0.815230872	0.864098847	0.14493554	0.014076843	0	0	0.008475469	0.039553018	0.93789467
03/08/20	12325	GBIF	PRESERVED_SPECIMEN	F	1228631456	SPECIES	Theobroma	glaucum	0	Theobroma glaucum H.Karst.	Neill, D.A. & Palacios, W.A.	6767	29-31/08/1985	-1.4628	-78.1869	1228488253	09/04/21	Paramo province	0	0	0	0	0	0	0	0	0	NA	NA	NA	NA	NA	NA
03/08/20	3289	GBIF	PRESERVED_SPECIMEN	NY	1928028831	SPECIES	Theobroma	speciosum	0	Theobroma speciosum Willd. ex Spreng.	Kainer, K.A.	62	17/09/89	-10.6552313	-68.5061281	1928028831	17/08/20	Rondônia province	1035	0	0	664	15225	1188676	0.852567884	0.881390572	0.077746108	0.000858494	0	0	0.000550763	0.012628567	0.985962177
03/08/20	2749	GBIF	PRESERVED_SPECIMEN	NY	1931367051	SPECIES	Theobroma	speciosum	0	Theobroma speciosum Willd. ex Spreng.	Ferreira, C.A.C. & Nelson, B.W.	2930	16/10/80	-10.1546261	-67.7374812	1931367051	13/08/20	Rondônia province	10394	0	0	15739	118026	1061443	0.771113074	0.841849774	0.154075544	0.008621419	0	0	0.013054889	0.09789798	0.880425713
03/08/20	3267	GBIF	PRESERVED_SPECIMEN	NY	1928140781	SPECIES	Theobroma	guianense	0	Theobroma guianense (Aubl.) J.F.Gmel.	Rosas Jr., A.; et al.	247	11/09/85	-7.634565	-72.6719458	1928140781	20/11/20	Rondônia province	16971	0	0	10218	47685	1130723	0.815230872	0.864098847	0.14493554	0.014076843	0	0	0.008475469	0.039553018	0.93789467
03/08/20	2824	GBIF	PRESERVED_SPECIMEN	NY	1930812207	SPECIES	Theobroma	guianense	0	Theobroma guianense (Aubl.) J.F.Gmel.	Cid-Ferreira, C.A.; et al.	5319	19/09/84	-7.4171213	-73.6332099	1930812207	24/03/21	Rondônia province	17172	0	0	8391	38487	780481	0.77832112	0.822305083	0.141565419	0.020333179	0	0	0.009935692	0.045572039	0.924159089
03/08/20	3167	GBIF	PRESERVED_SPECIMEN	NY	1928768049	SPECIES	Theobroma	guianense	0	Theobroma guianense (Aubl.) J.F.Gmel.	Cid-Ferreira, C.A.; et al.	5330	18/10/84	-7	-72	1424167213	20/11/20	Rondônia province	5672	0	0	1759	9165	1189005	0.868116627	0.880789042	0.086908665	0.004704707	0	0	0.001459023	0.007602018	0.986234252
03/08/20	3020	GBIF	PRESERVED_SPECIMEN	NY	1929672177	SPECIES	Theobroma	guianense	0	Theobroma guianense (Aubl.) J.F.Gmel.	Prance, G.T.; et al.	11803	13/04/71	-7.6279977	-72.6761487	1929672177	24/03/21	Rondônia province	16971	0	0	10218	47685	1130723	0.815230872	0.864098847	0.14493554	0.014076843	0	0	0.008475469	0.039553018	0.93789467
03/08/20	3083	GBIF	PRESERVED_SPECIMEN	NY	1929249324	SPECIES	Herrania	nitida	0	Herrania nitida (Poepp.) R.E.Schult.	Prance, G.T.; et al.	7765	02/10/68	-9.086637	-68.631696	1929249324	04/05/21	Rondônia province	18871	0	0	10134	42613	1071969	0.802087929	0.847659826	0.138518048	0.016501587	0	0	0.008861591	0.037262578	0.937374244
03/08/20	3332	GBIF	PRESERVED_SPECIMEN	NY	1927804905	SPECIES	Herrania	mariae	0	Herrania mariae (Mart.) Decne. ex Goudot	Daly, D.C.; et al.	6130	31/07/89	-10.32	-67.25	1927804905	04/05/21	Rondônia province	10394	0	0	15739	118026	1061443	0.771113074	0.841849774	0.154075544	0.008621419	0	0	0.013054889	0.09789798	0.880425713
03/08/20	2887	GBIF	PRESERVED_SPECIMEN	NY	1930438475	SPECIES	Theobroma	microcarpum	0	Theobroma microcarpum Mart.	Assi, L.A.	74/BR24	/11/1974	-9.971314	-67.811661	1930438475	14/09/20	Rondônia province	10394	0	0	15739	118026	1061443	0.771113074	0.841849774	0.154075544	0.008621419	0	0	0.013054889	0.09789798	0.880425713
03/08/20	2812	GBIF	PRESERVED_SPECIMEN	NY	1930893987	SPECIES	Theobroma	speciosum	0	Theobroma speciosum Willd. ex Spreng.	Daly, D.C.; et al.	749	24/10/80	-4.0333333	-46.0833333	1319879759	14/08/20	Pará province	14290	0	0	15757	72550	1103007	0.784526232	0.841884017	0.143861172	0.01185298	0	0	0.013069797	0.060177305	0.914899917
03/08/20	3184	GBIF	PRESERVED_SPECIMEN	NY	1928690555	SPECIES	Theobroma	speciosum	0	Theobroma speciosum Willd. ex Spreng.	Daly, D.C.; et al.	258	25/09/80	-4	-44.93	1928690555	14/08/20	Pará province	9775	0	0	2833	25054	441437	0.74461472	0.78199321	0.164871672	0.020402881	0	0	0.005913183	0.052293994	0.921389942
03/08/20	2972	GBIF	PRESERVED_SPECIMEN	NY	1929934474	SPECIES	Theobroma	speciosum	0	Theobroma speciosum Willd. ex Spreng.	Jangoux, J. & Bahia, R.P.	60	29/11/78	-2.9166667	-45.75	1929934474	17/08/20	Pará province	45992	0	0	7224	110841	1017595	0.715253987	0.765435934	0.210175038	0.038921781	0	0	0.006113475	0.093801728	0.861163016
03/08/20	3290	GBIF	PRESERVED_SPECIMEN	NY	1928020064	SPECIES	Theobroma	speciosum	Theobroma speciosa	Theobroma speciosum Willd. ex Spreng.	Taylor, E.L.; et al.	1144	04/04/83	-4.05	-46.4	1928020064	17/08/20	Pará province	14290	0	0	15757	72550	1103007	0.784526232	0.841884017	0.143861172	0.01185298	0	0	0.013069797	0.060177305	0.914899917
03/08/20	2881	GBIF	PRESERVED_SPECIMEN	NY	1930470185	SPECIES	Theobroma	guianense	0	Theobroma guianense (Aubl.) J.F.Gmel.	Rosa, N.A. & Santos, M.R.	2043	31/05/77	-8.941733	-58.555874	1930470185	24/03/21	Madeira province	11247	0	0	2866	10465	1179528	0.870689724	0.893175066	0.138094813	0.00934054	0	0	0.002380189	0.008691095	0.979588176
03/08/20	2771	GBIF	PRESERVED_SPECIMEN	NY	1931208431	SPECIES	Theobroma	guianense	0	Theobroma guianense (Aubl.) J.F.Gmel.	Berg, C.C.; et al.	19856	24/10/73	-10.2	-59.35	1931208431	24/03/21	Madeira province	2112	0	0	1806	20267	781935	0.834944039	0.873714089	0.099332484	0.002619957	0	0	0.002240361	0.025141418	0.969998263
03/08/20	2792	GBIF	PRESERVED_SPECIMEN	NY	1931065816	SPECIES	Theobroma	guianense	0	Theobroma guianense (Aubl.) J.F.Gmel.	Rosa, N.A. & Santos, M.R.	2160	20/06/77	-11.024918	-58.380441	1931065816	17/03/21	Madeira province	18932	0	0	18385	86851	1081418	0.762808398	0.818750024	0.159754872	0.015703567	0	0	0.015249845	0.072040485	0.897006103
03/08/20	2823	GBIF	PRESERVED_SPECIMEN	NY	1930827271	SPECIES	Theobroma	speciosum	0	Theobroma speciosum Willd. ex Spreng.	Prance, G.T.; et al.	18203	08/10/73	-10.2	-59.35	1321687277	11/08/20	Madeira province	2112	0	0	1806	20267	781935	0.834944039	0.873714089	0.099332484	0.002619957	0	0	0.002240361	0.025141418	0.969998263
03/08/20	3242	GBIF	PRESERVED_SPECIMEN	NY	1928295847	SPECIES	Theobroma	speciosum	0	Theobroma speciosum Willd. ex Spreng.	Thomas W.W. & Ackerley, D.	4074	28/09/85	-10.0333333	-56.95	1226934473	14/08/20	Madeira province	29481	0	0	14227	114996	1046888	0.761535075	0.837761223	0.172534775	0.024453546	0	0	0.011800841	0.095385504	0.868360109
03/08/20	3162	GBIF	PRESERVED_SPECIMEN	NY	1928800576	SPECIES	Theobroma	speciosum	0	Theobroma speciosum Willd. ex Spreng.	Thomas, W.W.; et al.	4111	30/09/85	-10	-57.1	1226934499	13/08/20	Madeira province	24437	0	0	14045	106926	1060185	0.767260629	0.846560836	0.176571751	0.020269693	0	0	0.011649869	0.088691623	0.879388815
03/08/20	2927	GBIF	PRESERVED_SPECIMEN	NY	1930227305	SPECIES	Theobroma	obovatum	0	Theobroma obovatum Klotzsch ex Bernoulli	Krukoff, B.A.	1668	23/12/31	-9.2040915	-62.0103797	1930227305	22/09/20	Madeira province	15111	0	0	15756	106968	713838	0.74852788	0.83764869	0.180421964	0.017742725	0	0	0.018500058	0.1255975	0.838159716
03/08/20	2922	GBIF	PRESERVED_SPECIMEN	NY	1930242290	SPECIES	Theobroma	microcarpum	Theobroma obovatum	Theobroma microcarpum Mart.	Krukoff, B.A.	1644	21/12/31	-9.2040915	-62.0103797	1930242290	14/09/20	Madeira province	15111	0	0	15756	106968	713838	0.74852788	0.83764869	0.180421964	0.017742725	0	0	0.018500058	0.1255975	0.838159716
03/08/20	14955	GBIF	PRESERVED_SPECIMEN	P	694272926	SPECIES	Theobroma	velutinum	0	Theobroma velutinum Benoist	Mori, S.A.; et al.	24183	22/09/95	3.61667	-53.2	694272926	07/08/20	Guianan Lowlands province	34723	0	0	27180	66151	922526	0.795097778	0.874870181	0.194142331	0.033051267	0	0	0.025871423	0.062966171	0.878111139
03/08/20	2743	GBIF	PRESERVED_SPECIMEN	NY	1931377122	SPECIES	Theobroma	velutinum	Theobroma sylvestre Mart.	Theobroma velutinum Benoist	Pires, J.M. & Silva, N.T.	860	15/04/86	-0.89194	-52.38139	1931377122	10/08/20	Roraima province	53201	0	0	43085	139777	896304	0.718129529	0.831293225	0.219116842	0.046982118	0	0	0.038048619	0.123437896	0.791531367
03/08/20	3325	GBIF	PRESERVED_SPECIMEN	NY	1927838481	SPECIES	Theobroma	obovatum	0	Theobroma obovatum Klotzsch ex Bernoulli	Plowman, T.C.; et al.	12443	10/12/82	-3.3166667	-64.8166667	1927838481	02/10/20	Imerí province	63999	0	0	3569	18289	543836	0.721028656	0.874201775	0.376837686	0.101635241	0	0	0.005667841	0.029044312	0.863652605
03/08/20	3223	GBIF	PRESERVED_SPECIMEN	NY	1928391073	SPECIES	Theobroma	speciosum	0	Theobroma speciosum Willd. ex Spreng.	Freitas, J.	236	25/08/07	-10.0368028	-67.7905133	1928391073	17/08/20	Rondônia province	10394	0	0	15739	118026	1061443	0.771113074	0.841849774	0.154075544	0.008621419	0	0	0.013054889	0.09789798	0.880425713
03/08/20	3203	GBIF	PRESERVED_SPECIMEN	NY	1928546696	SPECIES	Theobroma	speciosum	0	Theobroma speciosum Willd. ex Spreng.	Freitas, J.L.; et al.	40	14/11/06	-10.036803	-67.790513	1928546696	12/04/21	Rondônia province	10394	0	0	15739	118026	1061443	0.771113074	0.841849774	0.154075544	0.008621419	0	0	0.013054889	0.09789798	0.880425713
03/08/20	3248	GBIF	PRESERVED_SPECIMEN	NY	1928269406	SPECIES	Theobroma	speciosum	0	Theobroma speciosum Willd. ex Spreng.	Croat, T.B.	85946	02/12/01	-9.9580556	-67.0902778	1928269406	17/08/20	Rondônia province	29681	0	0	30627	128713	1016579	0.749688773	0.832219929	0.188412936	0.024619277	0	0	0.025403948	0.106762608	0.843214167
03/08/20	3252	GBIF	PRESERVED_SPECIMEN	NY	1928237824	SPECIES	Herrania	mariae	0	Herrania mariae (Mart.) Decne. ex Goudot	Croat, T.B.	84980	09/11/01	-9.95	-67.87	0	07/05/21	Rondônia province	10394	0	0	15739	118026	1061443	0.771113074	0.841849774	0.154075544	0.008621419	0	0	0.013054889	0.09789798	0.880425713
03/08/20	2863	GBIF	PRESERVED_SPECIMEN	NY	1930556836	SPECIES	Theobroma	speciosum	0	Theobroma speciosum Willd. ex Spreng.	Acevedo-Rodriguez, P.	13707	05/10/03	-9.99865	-66.78985	0	14/08/20	Rondônia province	3130	0	0	4001	21024	626064	0.849000162	0.88846153	0.114367692	0.004784331	0	0	0.006115689	0.032136028	0.956963952
03/08/20	3068	GBIF	PRESERVED_SPECIMEN	NY	1929355006	SPECIES	Herrania	purpurea	0	Herrania purpurea (Pittier) R.E.Schult.	Alain, H. & Liogier, P.	35340	07/01/85	18.2013463	-67.1451517	1929355006	08/12/20	Antilles	1001987	0	0	6643	30302	65102	-0.007644296	-0.074509807	0.221056934	0.90756897	0	0	0.006017025	0.027446618	0.058967387
03/08/20	11357	GBIF	PRESERVED_SPECIMEN	MO	1259170146	SPECIES	Theobroma	glaucum	0	Theobroma glaucum H.Karst.	Pipoly, J.J.; et al.	14607	05/03/91	-3.33333	-72.91666	1259170146	04/12/20	Imerí province	67693	0	0	32925	93198	548023	0.683749921	0.845768034	0.296659663	0.091250258	0	0	0.044382946	0.125631033	0.738735763
03/08/20	2841	GBIF	PRESERVED_SPECIMEN	NY	1930682272	SPECIES	Theobroma	guianense	0	Theobroma guianense (Aubl.) J.F.Gmel.	Peters, C.M.	201	18/04/87	-4.9166667	-73.6666667	1930682272	24/03/21	Madeira province	61995	0	0	28661	103005	1011908	0.71553712	0.807957888	0.218287162	0.05142385	0	0	0.023773836	0.085440983	0.839361331
03/08/20	2899	GBIF	PRESERVED_SPECIMEN	NY	1930381451	SPECIES	Herrania	nitida	0	Herrania nitida (Poepp.) R.E.Schult.	Pipoly, J.G.; et al.	6933	26/03/84	1.53	-62.8	1042588720	09/12/21	Pantepui province	12867	0	0	18297	92480	1081957	0.783230256	0.838404298	0.147325744	0.010672685	0	0	0.015176663	0.076708629	0.897442023
03/08/20	3273	GBIF	PRESERVED_SPECIMEN	NY	1928112505	SPECIES	Herrania	nitida	0	Herrania nitida (Poepp.) R.E.Schult.	Sobel, G.L.; et al.	4850	28/10/84	-0.79983	-49.732661	1928112505	26/04/21	Roraima province	142059	0	0	11241	98916	681438	0.597456666	0.792342603	0.421324369	0.152153796	0	0	0.012039792	0.105945029	0.729861383
03/08/20	3205	GBIF	PRESERVED_SPECIMEN	NY	1928517005	SPECIES	Herrania	nitida	0	Herrania nitida (Poepp.) R.E.Schult.	FrÃ³es, R.L.	20919	09/05/45	-4.3759905	-70.0301629	1928517005	26/04/21	Madeira province	60898	0	0	29641	105817	608931	0.689182291	0.8391155	0.292874337	0.075622728	0	0	0.036807995	0.131402841	0.756166435
03/08/20	3303	GBIF	PRESERVED_SPECIMEN	NY	1927951485	SPECIES	Herrania	camargoana	0	Herrania camargoana R.E.Schult.	Cid-Ferreira, C.A. & Lima, J.	3449	31/10/82	-1.8594503	-65.5826324	0	17/11/20	Imerí province	31897	0	0	2261	9291	1162124	0.82283312	0.863229513	0.185826025	0.026457958	0	0	0.001875457	0.007706709	0.963959876
03/08/20	2759	GBIF	PRESERVED_SPECIMEN	NY	1931299918	SPECIES	Herrania	camargoana	0	Herrania camargoana R.E.Schult.	Schultes, R.E.	8759	15/09/47	-0.1228	-67.1216	1931299918	17/11/20	Imerí province	8689	0	0	2049	6884	280120	0.817537028	0.865853667	0.16998939	0.029182984	0	0	0.006881797	0.023120688	0.940814531
03/08/20	3089	GBIF	PRESERVED_SPECIMEN	NY	1929211116	SPECIES	Herrania	camargoana	0	Herrania camargoana R.E.Schult.	Schultes, R.E. & LÃ³pez, H.R.	8762	15/09/47	-0.122886	-67.1216923	1839865143	17/11/20	Imerí province	8689	0	0	2049	6884	280120	0.817537028	0.865853667	0.16998939	0.029182984	0	0	0.006881797	0.023120688	0.940814531
03/08/20	3112	GBIF	PRESERVED_SPECIMEN	NY	1929102690	SPECIES	Herrania	nitida	0	Herrania nitida (Poepp.) R.E.Schult.	Prance, G.T.; et al.	16794	24/07/73	-4.358692	-69.900808	1929102690	05/05/21	Imerí province	75029	0	0	38445	124314	967782	0.705068176	0.822925329	0.246650966	0.062235291	0	0	0.03188948	0.103116368	0.802758861
03/08/20	2808	GBIF	PRESERVED_SPECIMEN	NY	1930955180	SPECIES	Herrania	mariae	0	Herrania mariae (Mart.) Decne. ex Goudot	Froes, R.L.	20578	04/05/45	-2.516085	-66.0925092	1930955180	07/05/21	Imerí province	86886	0	0	4696	20613	1093324	0.760631658	0.851097703	0.275399851	0.072073522	0	0	0.003895418	0.017098859	0.906932201
03/08/20	3189	GBIF	PRESERVED_SPECIMEN	NY	1928635543	SPECIES	Herrania	nitida	0	Herrania nitida (Poepp.) R.E.Schult.	Pires-O'Brien, M.J.P.; et al.	707a	28/10/85	-0.8666667	-52.5283333	1042591331	04/05/21	Roraima province	53201	0	0	43085	139777	896304	0.718129529	0.831293225	0.219116842	0.046982118	0	0	0.038048619	0.123437896	0.791531367
03/08/20	3071	GBIF	PRESERVED_SPECIMEN	NY	1929332633	SPECIES	Herrania	nitida	0	Herrania nitida (Poepp.) R.E.Schult.	Froes, R.L.	20630	02/04/45	-2.516085	-66.0925092	1930955180	07/05/21	Imerí province	86886	0	0	4696	20613	1093324	0.760631658	0.851097703	0.275399851	0.072073522	0	0	0.003895418	0.017098859	0.906932201
03/08/20	3012	GBIF	PRESERVED_SPECIMEN	NY	1929747764	SPECIES	Herrania	nycterodendron	0	Herrania nycterodendron R.E.Schult.	Rodrigues, W.A.	10576	24/03/84	1.533333	-62.8	1929747764	05/05/21	Pantepui province	12867	0	0	18297	92480	1081957	0.783230256	0.838404298	0.147325744	0.010672685	0	0	0.015176663	0.076708629	0.897442023
03/08/20	2886	GBIF	PRESERVED_SPECIMEN	NY	1930438968	SPECIES	Herrania	mariae	0	Herrania mariae (Mart.) Decne. ex Goudot	Cid-Ferreira, C.A. & Nelson, B.W.	2703	03/10/80	-9.051572	-68.642414	1930438968	04/05/21	Rondônia province	18871	0	0	10134	42613	1071969	0.802087929	0.847659826	0.138518048	0.016501587	0	0	0.008861591	0.037262578	0.937374244
03/08/20	3009	GBIF	PRESERVED_SPECIMEN	NY	1929764134	SPECIES	Herrania	nitida	0	Herrania nitida (Poepp.) R.E.Schult.	Amaral, I.L.; et al.	751	14/12/82	-3.365673	-64.666407	1929764134	04/05/21	Imerí province	82235	0	0	7199	28008	1088044	0.762530895	0.860740721	0.300094258	0.0682173	0	0	0.005971865	0.023233783	0.902577052
03/08/20	3018	GBIF	PRESERVED_SPECIMEN	NY	1929684781	SPECIES	Herrania	mariae	0	Herrania mariae (Mart.) Decne. ex Goudot	Lleras, E.; et al.	P17467	22/08/73	-2.5133	-66.0967	0	28/04/22	Imerí province	86886	0	0	4696	20613	1093324	0.760631658	0.851097703	0.275399851	0.072073522	0	0	0.003895418	0.017098859	0.906932201
03/08/20	14180	GBIF	PRESERVED_SPECIMEN	INPA	1042602012	SPECIES	Herrania	lemniscata	0	Herrania lemniscata (Schomb.) R.E.Schult.	Prance, G.T.; et al.	10661	22/02/71	1.37076	-63.4	1042602012	09/12/21	Pantepui province	99386	0	0	26556	68896	1010705	0.733644396	0.841259837	0.241663236	0.082440859	0	0	0.022028248	0.057149351	0.838381543
03/08/20	2752	GBIF	PRESERVED_SPECIMEN	NY	1931342617	SPECIES	Herrania	nycterodendron	0	Herrania nycterodendron R.E.Schult.	Prance, G.T.; et al.	10000	17/02/69	2.755664	-64.91196	1931342617	10/11/20	Imerí province	9684	0	0	3063	14082	1178773	0.866215213	0.888030887	0.111567872	0.008032502	0	0	0.002540639	0.011680472	0.977746387
03/08/20	2895	GBIF	PRESERVED_SPECIMEN	NY	1930409964	SPECIES	Herrania	nitida	0	Herrania nitida (Poepp.) R.E.Schult.	Pires, J.M.; et al.	50858	11/09/61	1.292	-51.917	1318395274	07/05/21	Roraima province	54616	0	0	38762	100867	1011350	0.764858366	0.868604302	0.216908861	0.045302112	0	0	0.032151759	0.083665742	0.838880387
03/08/20	3297	GBIF	PRESERVED_SPECIMEN	NY	1927979210	SPECIES	Herrania	nitida	0	Herrania nitida (Poepp.) R.E.Schult.	Cowan, R.S.	38514	22/11/54	1.6495951	-52.2704484	1927979210	07/05/21	Roraima province	54616	0	0	38762	100867	1011350	0.764858366	0.868604302	0.216908861	0.045302112	0	0	0.032151759	0.083665742	0.838880387
03/08/20	3036	GBIF	PRESERVED_SPECIMEN	NY	1929563029	SPECIES	Herrania	nitida	0	Herrania nitida (Poepp.) R.E.Schult.	Ducke, A.	595	14/10/40	-1.2407437	-48.459403	1929563029	04/05/21	Pará province	340265	0	0	27035	185859	652409	0.410442507	0.658553213	0.55760358	0.282244552	0	0	0.022425114	0.154167164	0.54116317
03/08/20	3207	GBIF	PRESERVED_SPECIMEN	NY	1928513044	SPECIES	Herrania	nitida	0	Herrania nitida (Poepp.) R.E.Schult.	Strudwick, J.J.; et al.	3092	18/07/81	-0.92	-54.43	1928513044	27/04/21	Roraima province	28559	0	0	19758	67195	541094	0.727516222	0.822763801	0.205283163	0.043494881	0	0	0.030091105	0.102336866	0.824077148
03/08/20	2910	GBIF	PRESERVED_SPECIMEN	NY	1930303466	SPECIES	Herrania	mariae	0	Herrania mariae (Mart.) Decne. ex Goudot	Anderson, A.B.	1068	08/10/84	-1.42	-48.45	1930303466	04/05/21	Pará province	340265	0	0	27035	185859	652409	0.410442507	0.658553213	0.55760358	0.282244552	0	0	0.022425114	0.154167164	0.54116317
03/08/20	2997	GBIF	PRESERVED_SPECIMEN	NY	1929803048	SPECIES	Herrania	nycterodendron	0	Herrania nycterodendron R.E.Schult.	Plowman, T.C.; et al.	12303	07/12/82	-1.783333	-65.62	1929803048	04/06/21	Imerí province	9006	0	0	470	2344	1189326	0.853721605	0.86691314	0.102784291	0.00749784	0	0	0.000391293	0.00195147	0.990159398
03/08/20	3246	GBIF	PRESERVED_SPECIMEN	NY	1928280830	SPECIES	Herrania	mariae	0	Herrania mariae (Mart.) Decne. ex Goudot	Plowman, T.C.; et al.	12270	06/12/82	-1.833333	-65.633333	0	28/04/22	Imerí province	31897	0	0	2261	9291	1162124	0.82283312	0.863229513	0.185826025	0.026457958	0	0	0.001875457	0.007706709	0.963959876
03/08/20	2973	GBIF	PRESERVED_SPECIMEN	NY	1929926194	SPECIES	Theobroma	glaucum	0	Theobroma glaucum H.Karst.	Plowman, T.C.; et al.	12129	03/12/82	-2.466667	-65.05	2516417796	09/04/21	Imerí province	14083	0	0	1047	2501	364623	0.803479693	0.850121379	0.200329467	0.036841995	0	0	0.002739016	0.00654277	0.953876218
03/08/20	2894	GBIF	PRESERVED_SPECIMEN	NY	1930415535	SPECIES	Theobroma	guianense	0	Theobroma guianense (Aubl.) J.F.Gmel.	Rabelo, B.V.	303	03/02/80	0.897731	-52.000485	1930415535	09/04/21	Roraima province	33251	0	0	22081	63321	1086942	0.790817119	0.854456842	0.172665138	0.027580572	0	0	0.018315438	0.052522613	0.901581377
03/08/20	2904	GBIF	PRESERVED_SPECIMEN	NY	1930350792	SPECIES	Theobroma	glaucum	Theobroma calodesmis	Theobroma glaucum H.Karst.	FrÃ³es, R.L.	20885	09/05/45	-5.4310167	-70.2798192	1930350792	04/09/20	Madeira province	9252	0	0	16043	53973	1122715	0.809129565	0.846649945	0.127970354	0.00769728	0	0	0.013347111	0.044903297	0.934052312
03/08/20	3143	GBIF	PRESERVED_SPECIMEN	NY	1928943337	SPECIES	Theobroma	glaucum	0	Theobroma glaucum H.Karst.	FrÃ³es, R.L.	20942	18/05/45	-4.696879	-69.504833	1928943337	04/09/20	Madeira province	20667	0	0	38505	151810	994622	0.761798706	0.861736357	0.193514951	0.017142445	0	0	0.031938348	0.125920286	0.824998922
03/08/20	2788	GBIF	PRESERVED_SPECIMEN	NY	1931079928	SPECIES	Theobroma	sylvestre	0	Theobroma sylvestre Mart.	Zarucchi, J.L.; et al.	3152	22/07/83	-3.3833333	-57.75	1321768248	04/09/20	Madeira province	79625	0	0	12016	39625	362213	0.613713615	0.786648333	0.365502456	0.161354384	0	0	0.024349567	0.080297237	0.733998813
03/08/20	3123	GBIF	PRESERVED_SPECIMEN	NY	1929065254	SPECIES	Theobroma	microcarpum	0	Theobroma microcarpum Mart.	Rosa, N.A. & Santos, M.R.	2107	12/06/77	-15.1908258	-59.9808239	1929065254	14/09/20	Rondônia province	26709	0	0	26181	300313	852397	0.676723784	0.703389823	0.175396902	0.022154114	0	0	0.021716158	0.249098374	0.707031354
03/08/20	3327	GBIF	PRESERVED_SPECIMEN	NY	1927833361	SPECIES	Theobroma	microcarpum	0	Theobroma microcarpum Mart.	Daly, D.C.; et al.	4233	04/11/86	-2.6166667	-65.5	1927833361	15/09/20	Imerí province	81023	0	0	15983	134173	817270	0.699316115	0.844185174	0.290611962	0.077278914	0	0	0.015244423	0.127972844	0.779503819
03/08/20	2987	GBIF	PRESERVED_SPECIMEN	NY	1929835759	SPECIES	Theobroma	microcarpum	0	Theobroma microcarpum Mart.	Cid-Ferreira, C.A.; et al.	6831	18/03/86	-1	-59	1930755201	14/09/20	Roraima province	132210	0	0	32860	88700	951528	0.694468793	0.841534406	0.295976054	0.109690715	0	0	0.027262967	0.073591759	0.789454558
03/08/20	3237	GBIF	PRESERVED_SPECIMEN	NY	1928346570	SPECIES	Theobroma	microcarpum	0	Theobroma microcarpum Mart.	Maguire, B.; et al.	60177	13/11/65	0.6466	-65.928794	1319432167	15/09/20	Imerí province	15222	0	0	4368	11830	1174174	0.836551741	0.858440757	0.107122904	0.012626141	0	0	0.00362311	0.00981259	0.973938158
03/08/20	2744	GBIF	PRESERVED_SPECIMEN	NY	1931376510	SPECIES	Theobroma	microcarpum	0	Theobroma microcarpum Mart.	Santos, M.R.	179	09/03/77	1.15767	-62.170135	1931376510	14/09/20	Pantepui province	12867	0	0	18297	92480	1081957	0.783230256	0.838404298	0.147325744	0.010672685	0	0	0.015176663	0.076708629	0.897442023
03/08/20	3145	GBIF	PRESERVED_SPECIMEN	NY	1928922154	SPECIES	Theobroma	microcarpum	0	Theobroma microcarpum Mart.	Amaral, I.L.; et al.	1251	12/05/83	-7.4166667	-55.3333333	1928922154	14/09/20	Xingu-Tapajós province	9731	0	0	8755	66519	1119868	0.814541171	0.867991507	0.132919066	0.00807637	0	0	0.007266326	0.055208308	0.929448996
03/08/20	3198	GBIF	PRESERVED_SPECIMEN	NY	1928583764	SPECIES	Theobroma	microcarpum	0	Theobroma microcarpum Mart.	Amaral, I.L.; et al.	1362	20/05/83	-5.9166667	-55.6666667	1928583764	15/09/20	Xingu-Tapajós province	1903	0	0	522	6796	803189	0.866696727	0.882390738	0.079178584	0.002342413	0	0	0.000642533	0.008365234	0.98864982
03/08/20	2966	GBIF	PRESERVED_SPECIMEN	NY	1929962467	SPECIES	Theobroma	obovatum	0	Theobroma obovatum Klotzsch ex Bernoulli	Vieira, M.G.; et al.	215	27/09/79	-7.3629104	-62.4853886	1424167794	25/09/20	Madeira province	27005	0	0	7488	28659	1142447	0.825362651	0.871999979	0.187464122	0.022399654	0	0	0.00621102	0.023771586	0.94761774
03/08/20	2936	GBIF	PRESERVED_SPECIMEN	NY	1930181767	SPECIES	Theobroma	obovatum	0	Theobroma obovatum Klotzsch ex Bernoulli	Teixeira, L.O.A.; et al.	985	07/06/82	-7.4917	-63.5725	1930181767	24/09/20	Madeira province	40646	0	0	17328	90765	860067	0.736639093	0.822811872	0.218325676	0.040291196	0	0	0.017176742	0.0899727	0.852559362
03/08/20	2859	GBIF	PRESERVED_SPECIMEN	NY	1930582027	SPECIES	Theobroma	obovatum	0	Theobroma obovatum Klotzsch ex Bernoulli	Cid-Ferreira, C.A.; et al.	7346	08/05/86	-3.3675464	-68.1994841	1930582027	24/09/20	Imerí province	51401	0	0	4176	23053	1126964	0.767605949	0.828045011	0.234279852	0.042635415	0	0	0.003463853	0.019121694	0.934779038
03/08/20	3125	GBIF	PRESERVED_SPECIMEN	NY	1929056293	SPECIES	Theobroma	obovatum	0	Theobroma obovatum Klotzsch ex Bernoulli	Cid-Ferreira, C.A. & Lima, J.	3418	30/10/82	-1.8333333	-65.5	1929056293	25/09/20	Imerí province	31897	0	0	2261	9291	1162124	0.82283312	0.863229513	0.185826025	0.026457958	0	0	0.001875457	0.007706709	0.963959876
03/08/20	2929	GBIF	PRESERVED_SPECIMEN	NY	1930219791	SPECIES	Theobroma	obovatum	0	Theobroma obovatum Klotzsch ex Bernoulli	Cid-Ferreira, C.A.; et al.	6653	08/03/86	-1.8742	-59.3986	1930219791	24/09/20	Roraima province	118132	0	0	18732	49324	394418	0.572277342	0.830633044	0.425114684	0.203463278	0	0	0.032262843	0.084952618	0.679321261
03/08/20	3172	GBIF	PRESERVED_SPECIMEN	NY	1928739635	SPECIES	Theobroma	obovatum	0	Theobroma obovatum Klotzsch ex Bernoulli	Miralha, J.H.; et al.	102	20/01/89	-4.85447	-65.339968	1095492003	02/10/20	Madeira province	9280	0	0	10700	37193	1049897	0.805553371	0.837223947	0.113886591	0.008382487	0	0	0.009665152	0.033595888	0.948356472
03/08/20	3051	GBIF	PRESERVED_SPECIMEN	NY	1929432583	SPECIES	Theobroma	obovatum	0	Theobroma obovatum Klotzsch ex Bernoulli	Santos, M.R.	130	04/03/77	1.15767	-62.170135	1929432583	23/09/20	Pantepui province	12867	0	0	18297	92480	1081957	0.783230256	0.838404298	0.147325744	0.010672685	0	0	0.015176663	0.076708629	0.897442023
03/08/20	3147	GBIF	PRESERVED_SPECIMEN	NY	1928909243	SPECIES	Theobroma	obovatum	0	Theobroma obovatum Klotzsch ex Bernoulli	Cid-Ferreira, C.A.; et al.	10086	14/01/91	-3.278339	-64.787482	1265517930	05/10/20	Imerí province	95010	0	0	15629	47113	1047731	0.733660523	0.836932003	0.274162397	0.078814882	0	0	0.012964928	0.03908226	0.869137931
03/08/20	2838	GBIF	PRESERVED_SPECIMEN	NY	1930712752	SPECIES	Theobroma	obovatum	0	Theobroma obovatum Klotzsch ex Bernoulli	Cid-Ferreira, C.A.; et al.	3287	18/10/82	-3.3577819	-64.7128836	1930712752	08/04/21	Imerí province	95010	0	0	15629	47113	1047731	0.733660523	0.836932003	0.274162397	0.078814882	0	0	0.012964928	0.03908226	0.869137931
03/08/20	2797	GBIF	PRESERVED_SPECIMEN	NY	1931051170	SPECIES	Theobroma	obovatum	0	Theobroma obovatum Klotzsch ex Bernoulli	Cid-Ferreira, C.A. & Nelson, B.W.	2713	03/10/80	-9.051572	-68.642414	1931051170	24/09/20	Rondônia province	18871	0	0	10134	42613	1071969	0.802087929	0.847659826	0.138518048	0.016501587	0	0	0.008861591	0.037262578	0.937374244
03/08/20	3118	GBIF	PRESERVED_SPECIMEN	NY	1929077318	SPECIES	Theobroma	obovatum	0	Theobroma obovatum Klotzsch ex Bernoulli	Cid-Ferreira, C.A. et al.	8296	26/10/86	-2.85	-66.6166667	1929077318	25/09/20	Madeira province	18777	0	0	2511	10578	1173686	0.802013819	0.82800138	0.126549877	0.015575438	0	0	0.002082863	0.008774404	0.973567295
03/08/20	2938	GBIF	PRESERVED_SPECIMEN	NY	1930168201	SPECIES	Theobroma	obovatum	0	Theobroma obovatum Klotzsch ex Bernoulli	Ducke, A.	s.n.	/9/1936	-1.4533	-48.4765	1321053142	24/09/20	Pará province	340265	0	0	27035	185859	652409	0.410442507	0.658553213	0.55760358	0.282244552	0	0	0.022425114	0.154167164	0.54116317
03/08/20	2785	GBIF	PRESERVED_SPECIMEN	NY	1931095502	SPECIES	Theobroma	obovatum	0	Theobroma obovatum Klotzsch ex Bernoulli	Cuatrecasas, J.	26666	08/11/62	-1.4361	-48.4494	1931095502	24/09/20	Pará province	340265	0	0	27035	185859	652409	0.410442507	0.658553213	0.55760358	0.282244552	0	0	0.022425114	0.154167164	0.54116317
03/08/20	3059	GBIF	PRESERVED_SPECIMEN	NY	1929393827	SPECIES	Theobroma	obovatum	0	Theobroma obovatum Klotzsch ex Bernoulli	Pires, J.M.	8264	15/01/65	-1.4369	-48.4477	1929393827	25/09/20	Pará province	340265	0	0	27035	185859	652409	0.410442507	0.658553213	0.55760358	0.282244552	0	0	0.022425114	0.154167164	0.54116317
03/08/20	2757	GBIF	PRESERVED_SPECIMEN	NY	1931309224	SPECIES	Theobroma	obovatum	0	Theobroma obovatum Klotzsch ex Bernoulli	Pires, J.M. & Silva, N.T.	4339	06/11/52	-1.438098	-48.44475	1319754472	24/09/20	Pará province	340265	0	0	27035	185859	652409	0.410442507	0.658553213	0.55760358	0.282244552	0	0	0.022425114	0.154167164	0.54116317
03/08/20	2912	GBIF	PRESERVED_SPECIMEN	NY	1930292673	SPECIES	Theobroma	obovatum	0	Theobroma obovatum Klotzsch ex Bernoulli	Cid-Ferreira, C.A.; et al.	8438	11/11/86	-2.2166667	-64.8333333	1930292673	24/09/20	Imerí province	14083	0	0	1047	2501	364623	0.803479693	0.850121379	0.200329467	0.036841995	0	0	0.002739016	0.00654277	0.953876218
03/08/20	3328	GBIF	PRESERVED_SPECIMEN	NY	1927827071	SPECIES	Theobroma	speciosum	0	Theobroma speciosum Willd. ex Spreng.	Lisboa, P.L.B; et al.	1393	04/02/80	-3.941473	-49.693335	1927827071	17/08/20	Pará province	137407	0	0	3319	23811	695604	0.609923629	0.814395905	0.485758946	0.15974939	0	0	0.00385867	0.027682671	0.80870927
03/08/20	3287	GBIF	PRESERVED_SPECIMEN	NY	1928038601	SPECIES	Theobroma	speciosum	0	Theobroma speciosum Willd. ex Spreng.	Sperling, C.R.; et al.	6177	15/06/82	-5.8166667	-50.5333333	1228386057	17/08/20	Xingu-Tapajós province	7898	0	0	3319	10732	530723	0.861419264	0.898891985	0.133840886	0.014290574	0	0	0.00600537	0.019418389	0.960285667
03/08/20	2868	GBIF	PRESERVED_SPECIMEN	NY	1930523273	SPECIES	Theobroma	speciosum	0	Theobroma speciosum Willd. ex Spreng.	Amaral, I.L.; et al.	1255	14/05/83	-7.666667	-55.25	1930523273	14/08/20	Xingu-Tapajós province	9731	0	0	8755	66519	1119868	0.814541171	0.867991507	0.132919066	0.00807637	0	0	0.007266326	0.055208308	0.929448996
03/08/20	2755	GBIF	PRESERVED_SPECIMEN	NY	1931315965	SPECIES	Theobroma	speciosum	0	Theobroma speciosum Willd. ex Spreng.	Pires-O'Brien, M.J.; et al.	1790	08/10/87	-0.85	-52.55	1931315965	14/08/20	Roraima province	53201	0	0	43085	139777	896304	0.718129529	0.831293225	0.219116842	0.046982118	0	0	0.038048619	0.123437896	0.791531367
03/08/20	2854	GBIF	PRESERVED_SPECIMEN	NY	1930620347	SPECIES	Theobroma	speciosum	0	Theobroma speciosum Willd. ex Spreng.	Daly, D.C.; et al.	1227	05/11/81	-3.9	-49.6666667	1930620347	14/08/20	Pará province	137407	0	0	3319	23811	695604	0.609923629	0.814395905	0.485758946	0.15974939	0	0	0.00385867	0.027682671	0.80870927
03/08/20	2935	GBIF	PRESERVED_SPECIMEN	NY	1930188734	SPECIES	Theobroma	speciosum	0	Theobroma speciosum Willd. ex Spreng.	Black, G.A.	47-1889	31/10/47	-2.925897	-54.941254	1930188734	17/08/20	Xingu-Tapajós province	83316	0	0	30126	95749	943729	0.718049184	0.834045589	0.247184686	0.072265205	0	0	0.026130174	0.083049127	0.818555494
03/08/20	3208	GBIF	PRESERVED_SPECIMEN	NY	1928511538	SPECIES	Theobroma	speciosum	Theobroma speciosa	Theobroma speciosum Willd. ex Spreng.	Assi, L.A.	74/BR19	/11/1974	-9.971314	-67.811661	1928511538	17/08/20	Rondônia province	10394	0	0	15739	118026	1061443	0.771113074	0.841849774	0.154075544	0.008621419	0	0	0.013054889	0.09789798	0.880425713
03/08/20	3102	GBIF	PRESERVED_SPECIMEN	NY	1929180854	SPECIES	Theobroma	speciosum	0	Theobroma speciosum Willd. ex Spreng.	Sobel, G.L.; et al.	4882	29/10/84	-0.989988	-49.9405818	1929180854	17/08/20	Roraima province	64969	0	0	12661	46314	554329	0.702800573	0.865788817	0.372179227	0.095785915	0	0	0.018666525	0.06828224	0.817265319
03/08/20	2855	GBIF	PRESERVED_SPECIMEN	NY	1930612370	SPECIES	Theobroma	speciosum	0	Theobroma speciosum Willd. ex Spreng.	Rodrigues, W.A.; et al.	10263	21/08/80	-3.8557925	-49.8207601	1424167269	14/08/20	Xingu-Tapajós province	137407	0	0	3319	23811	695604	0.609923629	0.814395905	0.485758946	0.15974939	0	0	0.00385867	0.027682671	0.80870927
03/08/20	3323	GBIF	PRESERVED_SPECIMEN	NY	1927846873	SPECIES	Theobroma	speciosum	0	Theobroma speciosum Willd. ex Spreng.	Silva, M.G. & RosÃ¡rio, C.	3919	24/11/78	-3.396906	-55.059354	1927846873	17/08/20	Xingu-Tapajós province	83316	0	0	30126	95749	943729	0.718049184	0.834045589	0.247184686	0.072265205	0	0	0.026130174	0.083049127	0.818555494
03/08/20	2834	GBIF	PRESERVED_SPECIMEN	NY	1930771981	SPECIES	Theobroma	speciosum	0	Theobroma speciosum Willd. ex Spreng.	Prance, G.T. & Silva, N.T.	58918	28/08/64	-2.97	-47.48	1321249061	14/08/20	Pará province	78713	0	0	57961	112123	862452	0.714032433	0.836120427	0.249689887	0.07083291	0	0	0.052158427	0.100898179	0.776110485
03/08/20	3019	GBIF	PRESERVED_SPECIMEN	NY	1929680948	SPECIES	Theobroma	speciosum	0	Theobroma speciosum Willd. ex Spreng.	Plowman, T.C.; et al.	8754	12/02/80	-8.05	-50.1666667	1042591721	17/08/20	Xingu-Tapajós province	1892	0	0	2922	62572	1138218	0.772986654	0.789352953	0.107176535	0.001569338	0	0	0.002423681	0.051900956	0.944106025
03/08/20	3178	GBIF	PRESERVED_SPECIMEN	NY	1928715470	SPECIES	Theobroma	speciosum	0	Theobroma speciosum Willd. ex Spreng.	Lobo, M.G.A.	128	05/12/78	-2.626469	-54.980084	1928715470	12/04/21	Xingu-Tapajós province	261557	0	0	5289	28275	217867	0.167423117	0.069203909	0.615833167	0.509869627	0	0	0.010310183	0.055118248	0.424701942
03/08/20	3107	GBIF	PRESERVED_SPECIMEN	NY	1929139784	SPECIES	Theobroma	speciosum	0	Theobroma speciosum Willd. ex Spreng.	Bahia, R.P.	42	15/08/78	-3.271835	-52.397876	1929139784	24/08/20	Xingu-Tapajós province	65347	0	0	5757	176970	773917	0.688004111	0.791157126	0.288686112	0.063940876	0	0	0.005633122	0.173161995	0.757264007
03/08/20	3159	GBIF	PRESERVED_SPECIMEN	NY	1928821980	SPECIES	Theobroma	glaucum	0	Theobroma glaucum H.Karst.	Pires, J.M.	8262	15/01/65	-1.2407437	-48.459403	1928821980	12/04/21	Pará province	340265	0	0	27035	185859	652409	0.410442507	0.658553213	0.55760358	0.282244552	0	0	0.022425114	0.154167164	0.54116317
03/08/20	2885	GBIF	PRESERVED_SPECIMEN	NY	1930440771	SPECIES	Theobroma	speciosum	0	Theobroma speciosum Willd. ex Spreng.	Strudwick, J.J.; et al.	3798	30/07/81	-0.9166667	-54.4333333	1322496323	14/08/20	Roraima province	28559	0	0	19758	67195	541094	0.727516222	0.822763801	0.205283163	0.043494881	0	0	0.030091105	0.102336866	0.824077148
03/08/20	2940	GBIF	PRESERVED_SPECIMEN	NY	1930145968	SPECIES	Theobroma	speciosum	0	Theobroma speciosum Willd. ex Spreng.	Daly, D.C.; et al.	1346	14/11/81	-3.9166667	-49.7833333	1320891908	17/08/20	Xingu-Tapajós province	137407	0	0	3319	23811	695604	0.609923629	0.814395905	0.485758946	0.15974939	0	0	0.00385867	0.027682671	0.80870927
03/08/20	3209	GBIF	PRESERVED_SPECIMEN	NY	1928511126	SPECIES	Theobroma	speciosum	0	Theobroma speciosum Willd. ex Spreng.	Prance, G.T.; et al.	26497	27/11/80	-50.7972222	-3.3722222	1928511126	21/08/20	0	0	0	0	0	0	0	0	0	0	NA	NA	NA	NA	NA	NA
03/08/20	4217	GBIF	PRESERVED_SPECIMEN	FMB	1707494485	SPECIES	Theobroma	glaucum	0	Theobroma glaucum H.Karst.	Rivera, L.; et al.	301	04/05/12	1.07775	-76.629167	1707494485	04/09/20	Napo province	0	0	0	0	0	0	0	0	0	NA	NA	NA	NA	NA	NA
03/08/20	3280	GBIF	PRESERVED_SPECIMEN	NY	1928079988	SPECIES	Theobroma	speciosum	0	Theobroma speciosum Willd. ex Spreng.	Anderson, A.B.; et al.	1173	08/10/84	-1.4166667	-48.45	1319271997	14/08/20	Pará province	340265	0	0	27035	185859	652409	0.410442507	0.658553213	0.55760358	0.282244552	0	0	0.022425114	0.154167164	0.54116317
03/08/20	2974	GBIF	PRESERVED_SPECIMEN	NY	1929923264	SPECIES	Theobroma	speciosum	0	Theobroma speciosum Willd. ex Spreng.	BalÃ©e, W.L. & Ribeiro, B.G.	1670	01/11/85	-4.8166667	-52.5166667	1929923264	12/04/21	Xingu-Tapajós province	9887	0	0	322	1469	1193920	0.865841323	0.878498316	0.120627245	0.008200909	0	0	0.000267087	0.001218482	0.990313521
03/08/20	706	GBIF	PRESERVED_SPECIMEN	U	2517178984	SPECIES	Theobroma	velutinum	0	Theobroma velutinum Benoist	Granville, J.J.; et al.	5166b	22/09/74	3.860278	-53.304167	2517178984	07/08/20	Guianan Lowlands province	34723	0	0	27180	66151	922526	0.795097778	0.874870181	0.194142331	0.033051267	0	0	0.025871423	0.062966171	0.878111139
03/08/20	3022	GBIF	PRESERVED_SPECIMEN	NY	1929666015	SPECIES	Theobroma	speciosum	0	Theobroma speciosum Willd. ex Spreng.	Vasconcelos, R.T.P.; et al.	311	16/10/86	-4.322019	-52.741628	1929666015	17/08/20	Xingu-Tapajós province	54315	0	0	19205	61381	1063973	0.775989005	0.864552379	0.242294319	0.045305011	0	0	0.016019198	0.051198875	0.887476916
03/08/20	3138	GBIF	PRESERVED_SPECIMEN	NY	1928971249	SPECIES	Theobroma	speciosum	Theobroma speciosa	Theobroma speciosum Willd. ex Spreng.	Prance, G.T.; et al.	26413	23/11/80	-3.3722222	-50.7972222	1928971249	12/04/21	Xingu-Tapajós province	12272	0	0	13024	87843	1088834	0.797507503	0.864243329	0.152204284	0.01020988	0	0	0.010835518	0.07308234	0.905872262
03/08/20	3006	GBIF	PRESERVED_SPECIMEN	NY	1929772379	SPECIES	Theobroma	speciosum	0	Theobroma speciosum Willd. ex Spreng.	Ducke, A.	s.n.	/9/1936	-1.2407437	-48.459403	1929772379	17/08/20	Pará province	340265	0	0	27035	185859	652409	0.410442507	0.658553213	0.55760358	0.282244552	0	0	0.022425114	0.154167164	0.54116317
03/08/20	3039	GBIF	PRESERVED_SPECIMEN	NY	1929527212	SPECIES	Theobroma	speciosum	0	Theobroma speciosum Willd. ex Spreng.	Krukoff, B.A.	1117	14/09/31	-3.727227	-53.986773	1265518228	17/08/20	Xingu-Tapajós province	36881	0	0	19471	81633	1067583	0.777507842	0.85780564	0.193523152	0.030592219	0	0	0.016150893	0.06771331	0.885543578
03/08/20	3195	GBIF	PRESERVED_SPECIMEN	NY	1928612501	SPECIES	Theobroma	speciosum	0	Theobroma speciosum Willd. ex Spreng.	Silva, M.B. & Souza, R.	2432	28/08/69	-2.4464262	-54.70918	1319231908	17/08/20	Xingu-Tapajós province	308326	0	0	24391	92646	477834	0.346147125	0.642649174	0.561244672	0.341371816	0	0	0.027005183	0.102575629	0.529047373
03/08/20	2791	GBIF	PRESERVED_SPECIMEN	NY	1931075765	SPECIES	Theobroma	speciosum	0	Theobroma speciosum Willd. ex Spreng.	Pires, J.M.	51892	/9/1961	-1.284992	-48.455522	1319265985	21/08/20	Pará province	340265	0	0	27035	185859	652409	0.410442507	0.658553213	0.55760358	0.282244552	0	0	0.022425114	0.154167164	0.54116317
03/08/20	3193	GBIF	PRESERVED_SPECIMEN	NY	1928612924	SPECIES	Theobroma	speciosum	0	Theobroma speciosum Willd. ex Spreng.	Archer, W.A.	7721	29/10/42	-1.453489	-48.476548	1320732542	17/08/20	Pará province	340265	0	0	27035	185859	652409	0.410442507	0.658553213	0.55760358	0.282244552	0	0	0.022425114	0.154167164	0.54116317
03/08/20	2933	GBIF	PRESERVED_SPECIMEN	NY	1930205163	SPECIES	Theobroma	speciosum	0	Theobroma speciosum Willd. ex Spreng.	Ramos, J.F.	1172	25/11/83	-3.775695	-49.585161	1930205163	14/08/20	Pará province	137407	0	0	3319	23811	695604	0.609923629	0.814395905	0.485758946	0.15974939	0	0	0.00385867	0.027682671	0.80870927
03/08/20	3306	GBIF	PRESERVED_SPECIMEN	NY	1927936357	SPECIES	Theobroma	sylvestre	Theobroma spruceanum	Theobroma sylvestre Mart.	FroÃ©s, R.L.	20556	16/03/45	-3.085923	-59.991424	1929204033	27/08/20	Imerí province	162096	0	0	27965	95764	796175	0.615719998	0.799432695	0.378651822	0.14981146	0	0	0.025845656	0.08850647	0.735836414
03/08/20	2982	GBIF	PRESERVED_SPECIMEN	NY	1929859799	SPECIES	Theobroma	sylvestre	0	Theobroma sylvestre Mart.	Steward, W.C.; et al.	P20412	21/02/74	-1.784153	-60.141982	1929859799	26/08/20	Roraima province	124061	0	0	40085	137125	552814	0.606223658	0.791881442	0.305774607	0.145256034	0	0	0.046933268	0.160551936	0.647258762
03/08/20	2986	GBIF	PRESERVED_SPECIMEN	NY	1929842565	SPECIES	Theobroma	sylvestre	0	Theobroma sylvestre Mart.	Pires, J.M.	8267	15/01/65	-1.2407437	-48.459403	1929842565	13/04/21	Pará province	340265	0	0	27035	185859	652409	0.410442507	0.658553213	0.55760358	0.282244552	0	0	0.022425114	0.154167164	0.54116317
03/08/20	3264	GBIF	PRESERVED_SPECIMEN	NY	1928156471	SPECIES	Theobroma	sylvestre	0	Theobroma sylvestre Mart.	Cunha, N.M.L.; et al.	900	04/02/89	-2.4252778	-59.7277778	1042501697	27/08/20	Roraima province	65726	0	0	22028	65507	679081	0.705615266	0.831259936	0.271750876	0.078965137	0	0	0.026465083	0.078702024	0.815867756
03/08/20	3120	GBIF	PRESERVED_SPECIMEN	NY	1929075458	SPECIES	Theobroma	sylvestre	0	Theobroma sylvestre Mart.	Prance, G.T.; et al.	18755	17/08/73	-2.4457	-60.02551	1929075458	31/08/20	Roraima province	6545	0	0	20154	114886	468460	0.71438405	0.820109963	0.181457055	0.010728717	0	0	0.033036907	0.188323812	0.767910564
03/08/20	2760	GBIF	PRESERVED_SPECIMEN	NY	1931275984	SPECIES	Theobroma	sylvestre	0	Theobroma sylvestre Mart.	Silva, M.G. & Rosario, C.S.	3832	19/11/78	-3.1008333	-55.5511111	1077586260	26/08/20	Madeira province	168520	0	0	34126	85916	917027	0.651725835	0.840688884	0.372873335	0.139782297	0	0	0.028306496	0.071264751	0.760646456
03/08/20	3283	GBIF	PRESERVED_SPECIMEN	NY	1928049878	SPECIES	Theobroma	sylvestre	0	Theobroma sylvestre Mart.	Nascimento, J.R.M.; et al.	INPA/WWF 2206.3097	19/08/81	-2.435061	-59.81096	1930812048	13/04/21	Roraima province	65726	0	0	22028	65507	679081	0.705615266	0.831259936	0.271750876	0.078965137	0	0	0.026465083	0.078702024	0.815867756
03/08/20	3000	GBIF	PRESERVED_SPECIMEN	NY	1929794899	SPECIES	Theobroma	sylvestre	0	Theobroma sylvestre Mart.	Pereira, M.J.R.; et al.	s.n.	26/10/84	-2.390061	-59.986585	1929794899	13/04/21	Roraima province	6545	0	0	20154	114886	468460	0.71438405	0.820109963	0.181457055	0.010728717	0	0	0.033036907	0.188323812	0.767910564
03/08/20	2867	GBIF	PRESERVED_SPECIMEN	NY	1930532231	SPECIES	Theobroma	sylvestre	Theobroma spruceana	Theobroma sylvestre Mart.	Pires, J.M.	136	30/11/46	-4.9845842	-58.0609998	1930532231	26/08/20	Madeira province	636	0	0	597	2481	329548	0.841922999	0.848949075	0.058122602	0.001908408	0	0	0.001791383	0.007444593	0.988855615
03/08/20	2928	GBIF	PRESERVED_SPECIMEN	NY	1930227091	SPECIES	Theobroma	sylvestre	0	Theobroma sylvestre Mart.	Santos, M.R.	190	10/03/77	0.025514	-62.076335	1930227091	25/08/20	Pantepui province	27374	0	0	73856	355051	749316	0.635368863	0.713025808	0.212733878	0.022705763	0	0	0.061260935	0.294502226	0.621531075
03/08/20	2939	GBIF	PRESERVED_SPECIMEN	NY	1930153809	SPECIES	Theobroma	sylvestre	0	Theobroma sylvestre Mart.	Cid-Ferreira, C.A.; et al.	960	01/09/79	-2.048707	-59.895616	1424167926	27/08/20	Roraima province	6545	0	0	20154	114886	468460	0.71438405	0.820109963	0.181457055	0.010728717	0	0	0.033036907	0.188323812	0.767910564
03/08/20	2763	GBIF	PRESERVED_SPECIMEN	NY	1931243435	SPECIES	Theobroma	sylvestre	0	Theobroma sylvestre Mart.	Farney, C.; et al.	2005	25/11/87	-1.7689043	-55.867051	1265518036	26/08/20	Madeira province	72416	0	0	16444	86914	1029710	0.733677931	0.838136613	0.250204515	0.060072137	0	0	0.013640994	0.072098842	0.854188027
03/08/20	3133	GBIF	PRESERVED_SPECIMEN	NY	1929007704	SPECIES	Theobroma	sylvestre	0	Theobroma sylvestre Mart.	Cid-Ferreira, C.A.; et al.	9601	13/11/87	-1.55	-56.4166667	1929007704	13/04/21	Roraima province	128531	0	0	42600	122336	911948	0.67403609	0.825902343	0.287034746	0.106628008	0	0	0.035340526	0.101488699	0.756542767
03/08/20	3225	GBIF	PRESERVED_SPECIMEN	NY	1928380282	SPECIES	Theobroma	sylvestre	0	Theobroma sylvestre Mart.	Cid-Ferreira, C.A.; et al.	9666	24/11/87	-1.0166667	-57.0166667	1424762777	13/02/21	Roraima province	20771	0	0	16421	54133	895582	0.805162822	0.863636374	0.169231435	0.021046563	0	0	0.016638852	0.054851166	0.907463419
03/08/20	2996	GBIF	PRESERVED_SPECIMEN	NY	1929809276	SPECIES	Theobroma	sylvestre	0	Theobroma sylvestre Mart.	Cid-Ferreira, C.A.; et al.	3965	30/06/83	-3.9936	-59.0922	1929809276	27/08/20	Madeira province	101788	0	0	14925	59455	1028979	0.716106663	0.83954519	0.302324877	0.084461066	0	0	0.012384381	0.049334231	0.853820322
03/08/20	3079	GBIF	PRESERVED_SPECIMEN	NY	1929274836	SPECIES	Theobroma	sylvestre	0	Theobroma sylvestre Mart.	CoÃªlho, D.F.; et al.	192	17/11/85	-0.491675	-58.088665	1929274836	27/08/20	Roraima province	3134	0	0	4052	33560	1164853	0.834639099	0.857712746	0.089308997	0.002599538	0	0	0.003360985	0.027836785	0.966202693
03/08/20	2798	GBIF	PRESERVED_SPECIMEN	NY	1931036373	SPECIES	Theobroma	guianense	0	Theobroma guianense (Aubl.) J.F.Gmel.	Teixeira, L.O.A.; et al.	132	01/05/82	-7.9244	-63.3258	1931036373	20/11/20	Madeira province	40646	0	0	17328	90765	860067	0.736639093	0.822811872	0.218325676	0.040291196	0	0	0.017176742	0.0899727	0.852559362
03/08/20	2842	GBIF	PRESERVED_SPECIMEN	NY	1930680838	SPECIES	Theobroma	guianense	0	Theobroma guianense (Aubl.) J.F.Gmel.	FrÃ³es, R.L.	20648	04/04/45	-2.516085	-66.0925092	1930680838	24/03/21	Imerí province	86886	0	0	4696	20613	1093324	0.760631658	0.851097703	0.275399851	0.072073522	0	0	0.003895418	0.017098859	0.906932201
03/08/20	3031	GBIF	PRESERVED_SPECIMEN	NY	1929604919	SPECIES	Theobroma	guianense	0	Theobroma guianense (Aubl.) J.F.Gmel.	Pereira, M.J.R.; et al.	s.n.	30/08/86	-2.429224	-59.888583	1929604919	26/03/21	Roraima province	6545	0	0	20154	114886	468460	0.71438405	0.820109963	0.181457055	0.010728717	0	0	0.033036907	0.188323812	0.767910564
03/08/20	3139	GBIF	PRESERVED_SPECIMEN	NY	1928959342	SPECIES	Theobroma	guianense	0	Theobroma guianense (Aubl.) J.F.Gmel.	Cid-Ferreira, C.A.; et al.	8087	12/09/86	-1.75	-59.75	1928959342	26/03/21	Roraima province	118132	0	0	18732	49324	394418	0.572277342	0.830633044	0.425114684	0.203463278	0	0	0.032262843	0.084952618	0.679321261
03/08/20	3101	GBIF	PRESERVED_SPECIMEN	NY	1929184143	SPECIES	Theobroma	guianense	0	Theobroma guianense (Aubl.) J.F.Gmel.	Cid-Ferreira, C.A.; et al.	7046	31/03/86	-1.9675	-59.4892	1929184143	24/03/21	Roraima province	116719	0	0	35687	91247	961784	0.691262024	0.82510221	0.26579304	0.096827126	0	0	0.029605031	0.0756962	0.797871643
03/08/20	3011	GBIF	PRESERVED_SPECIMEN	NY	1929749002	SPECIES	Theobroma	guianense	0	Theobroma guianense (Aubl.) J.F.Gmel.	Dionizia, F.; et al.	203	09/09/87	-1.915556	-59.473414	1929749002	26/03/21	Roraima province	116719	0	0	35687	91247	961784	0.691262024	0.82510221	0.26579304	0.096827126	0	0	0.029605031	0.0756962	0.797871643
03/08/20	3261	GBIF	PRESERVED_SPECIMEN	NY	1928199672	SPECIES	Theobroma	guianense	0	Theobroma guianense (Aubl.) J.F.Gmel.	Dick, C.	54	25/03/92	-2.3166667	-60.0833333	1928199672	24/03/21	Roraima province	6545	0	0	20154	114886	468460	0.71438405	0.820109963	0.181457055	0.010728717	0	0	0.033036907	0.188323812	0.767910564
03/08/20	2786	GBIF	PRESERVED_SPECIMEN	NY	1931093629	SPECIES	Theobroma	guianense	0	Theobroma guianense (Aubl.) J.F.Gmel.	Krukoff, B.A.	8226	11/9-26/10/1936	-3.454282	-68.800056	1931093629	17/03/21	Imerí province	51401	0	0	4176	23053	1126964	0.767605949	0.828045011	0.234279852	0.042635415	0	0	0.003463853	0.019121694	0.934779038
03/08/20	3334	GBIF	PRESERVED_SPECIMEN	NY	1927778457	SPECIES	Theobroma	guianense	Theobroma guianense	Theobroma guianense (Aubl.) J.F.Gmel.	FrÃ³es, R.L.	21162	17/10/45	0.605299	-69.197624	1927778457	26/03/21	Imerí province	7934	0	0	2793	10758	650484	0.81857355	0.840294003	0.112470154	0.011807092	0	0	0.004156442	0.016009667	0.968026799
03/08/20	2896	GBIF	PRESERVED_SPECIMEN	NY	1930390910	SPECIES	Theobroma	guianense	0	Theobroma guianense (Aubl.) J.F.Gmel.	FrÃ³es, R.L.	20518	17/02/45	-3.1190275	-60.0217314	1930390910	24/03/21	Imerí province	162096	0	0	27965	95764	796175	0.615719998	0.799432695	0.378651822	0.14981146	0	0	0.025845656	0.08850647	0.735836414
03/08/20	3099	GBIF	PRESERVED_SPECIMEN	NY	1929187886	SPECIES	Theobroma	speciosum	0	Theobroma speciosum Willd. ex Spreng.	Prance, G.T.; et al.	14628	27/07/71	-8.58	-65.55	1929187886	17/08/20	Madeira province	20180	0	0	18415	67718	646930	0.747025258	0.820983112	0.174511338	0.026790823	0	0	0.024447622	0.089901931	0.858859624
03/08/20	2799	GBIF	PRESERVED_SPECIMEN	NY	1931029607	SPECIES	Theobroma	speciosum	0	Theobroma speciosum Willd. ex Spreng.	Dionizia, F.; et al.	35	04/08/87	-8.754	-63.459	1931029607	14/08/20	Madeira province	65332	0	0	12157	73394	1041097	0.744790557	0.849641085	0.269602511	0.054809644	0	0	0.010198997	0.061573181	0.873418178
03/08/20	3052	GBIF	PRESERVED_SPECIMEN	NY	1929423309	SPECIES	Theobroma	speciosum	0	Theobroma speciosum Willd. ex Spreng.	Thomas, W.W.; et al.	6254	12/09/88	-9.1	-63.2166667	1929423309	17/08/20	Madeira province	49282	0	0	12119	120038	998433	0.725023605	0.811248779	0.21998986	0.041768938	0	0	0.010271453	0.101738155	0.846221455
03/08/20	2906	GBIF	PRESERVED_SPECIMEN	NY	1930341569	SPECIES	Theobroma	speciosum	Theobroma speciosa	Theobroma speciosum Willd. ex Spreng.	Vieira, M.G.; et al.	295	06/10/79	-9.1234722	-62.9	1930341569	14/08/20	Madeira province	24980	0	0	30605	162931	987085	0.741052489	0.836520672	0.192982365	0.020719956	0	0	0.025385679	0.135145044	0.818749321
03/08/20	3228	GBIF	PRESERVED_SPECIMEN	NY	1928372338	SPECIES	Theobroma	speciosum	0	Theobroma speciosum Willd. ex Spreng.	Prance, G.T.; et al.	5411	30/06/68	-9.260078	-64.432398	1321594479	17/08/20	Madeira province	24587	0	0	6138	73033	989942	0.777572666	0.865239799	0.208227848	0.022480571	0	0	0.005612142	0.066776081	0.905131206
03/08/20	3308	GBIF	PRESERVED_SPECIMEN	NY	1927915529	SPECIES	Theobroma	speciosum	0	Theobroma speciosum Willd. ex Spreng.	Cid-Ferreira, C.A.; et al.	4686	20/06/84	-11.2	-61.0166667	1927915529	17/08/20	Madeira province	27300	0	0	23500	113552	1041241	0.764962855	0.851400733	0.180745273	0.022644458	0	0	0.019492482	0.094187674	0.863675386
03/08/20	3293	GBIF	PRESERVED_SPECIMEN	NY	1927993994	SPECIES	Theobroma	guianense	0	Theobroma guianense (Aubl.) J.F.Gmel.	Souza, S.A.M.; et al.	664	03/12/86	-3.2066914	-52.2071249	1927993994	12/04/21	Xingu-Tapajós province	65347	0	0	5757	176970	773917	0.688004111	0.791157126	0.288686112	0.063940876	0	0	0.005633122	0.173161995	0.757264007
03/08/20	3245	GBIF	PRESERVED_SPECIMEN	NY	1928281568	SPECIES	Theobroma	guianense	0	Theobroma guianense (Aubl.) J.F.Gmel.	Prance, G.T.; et al.	22673	18/09/74	-1.569003	-60.221386	1928281568	18/03/21	Roraima province	114418	0	0	13798	39329	687377	0.696897101	0.828066587	0.288599491	0.133834432	0	0	0.016139484	0.046003027	0.804023057
03/08/20	3185	GBIF	PRESERVED_SPECIMEN	NY	1928673557	SPECIES	Theobroma	guianense	0	Theobroma guianense (Aubl.) J.F.Gmel.	Mori, S.A.	21331	08/07/90	-2.41625	-59.74583	1928673557	26/03/21	Roraima province	65726	0	0	22028	65507	679081	0.705615266	0.831259936	0.271750876	0.078965137	0	0	0.026465083	0.078702024	0.815867756
03/08/20	2931	GBIF	PRESERVED_SPECIMEN	NY	1930217161	SPECIES	Theobroma	guianense	0	Theobroma guianense (Aubl.) J.F.Gmel.	Pacheco, M.; et al.	119	21/01/89	-2.423611	-59.910556	1930217161	25/03/21	Roraima province	6545	0	0	20154	114886	468460	0.71438405	0.820109963	0.181457055	0.010728717	0	0	0.033036907	0.188323812	0.767910564
03/08/20	3103	GBIF	PRESERVED_SPECIMEN	NY	1929176505	SPECIES	Theobroma	guianense	0	Theobroma guianense (Aubl.) J.F.Gmel.	Steward, W.C.; et al.	20389	20/02/74	-1.633609	-60.189714	1929176505	05/04/21	Roraima province	124061	0	0	40085	137125	552814	0.606223658	0.791881442	0.305774607	0.145256034	0	0	0.046933268	0.160551936	0.647258762
03/08/20	3075	GBIF	PRESERVED_SPECIMEN	NY	1929308671	SPECIES	Theobroma	speciosum	0	Theobroma speciosum Willd. ex Spreng.	Santos, M.R.	294	13/11/78	-0.72	-52.52	1929308671	10/08/20	Roraima province	53201	0	0	43085	139777	896304	0.718129529	0.831293225	0.219116842	0.046982118	0	0	0.038048619	0.123437896	0.791531367
03/08/20	2916	GBIF	PRESERVED_SPECIMEN	NY	1930274983	SPECIES	Theobroma	velutinum	0	Theobroma velutinum Benoist	Silva, N.T.	983	14/09/68	-0.880931	-52.600822	1319511674	10/08/20	Roraima province	53201	0	0	43085	139777	896304	0.718129529	0.831293225	0.219116842	0.046982118	0	0	0.038048619	0.123437896	0.791531367
03/08/20	2999	GBIF	PRESERVED_SPECIMEN	NY	1929795842	SPECIES	Theobroma	velutinum	0	Theobroma velutinum Benoist	s.c.	s.n.	0	0	0	0	10/08/20	0	0	0	0	0	0	0	0	0	0	NA	NA	NA	NA	NA	NA
03/08/20	3152	GBIF	PRESERVED_SPECIMEN	NY	1928884659	SPECIES	Theobroma	guianense	0	Theobroma guianense (Aubl.) J.F.Gmel.	Oliveira, E.	4266	07/04/68	-0.867854	-52.539719	1928884659	26/03/21	Roraima province	53201	0	0	43085	139777	896304	0.718129529	0.831293225	0.219116842	0.046982118	0	0	0.038048619	0.123437896	0.791531367
03/08/20	2981	GBIF	PRESERVED_SPECIMEN	NY	1929862168	SPECIES	Theobroma	guianense	0	Theobroma guianense (Aubl.) J.F.Gmel.	Beck, H.T.	404	11/11/87	-0.78	-49.72	1929862168	25/03/21	Roraima province	142059	0	0	11241	98916	681438	0.597456666	0.792342603	0.421324369	0.152153796	0	0	0.012039792	0.105945029	0.729861383
03/08/20	3153	GBIF	PRESERVED_SPECIMEN	NY	1928863316	SPECIES	Theobroma	guianense	0	Theobroma guianense (Aubl.) J.F.Gmel.	Silva, M.G. & Rosario, C.S.	3870	21/11/78	-3.396906	-55.059354	1928863316	26/03/21	Xingu-Tapajós province	83316	0	0	30126	95749	943729	0.718049184	0.834045589	0.247184686	0.072265205	0	0	0.026130174	0.083049127	0.818555494
03/08/20	3204	GBIF	PRESERVED_SPECIMEN	NY	1928540045	SPECIES	Theobroma	guianense	0	Theobroma guianense (Aubl.) J.F.Gmel.	Amaral, I.L.; et al.	1270	15/05/83	-7.666667	-55.25	1928540045	26/03/21	Xingu-Tapajós province	9731	0	0	8755	66519	1119868	0.814541171	0.867991507	0.132919066	0.00807637	0	0	0.007266326	0.055208308	0.929448996
03/08/20	3043	GBIF	PRESERVED_SPECIMEN	NY	1929503361	SPECIES	Theobroma	guianense	0	Theobroma guianense (Aubl.) J.F.Gmel.	Pires, J.M.	51739	/9/1961	-1.4557549	-48.4901799	1929503361	26/03/21	Pará province	340265	0	0	27035	185859	652409	0.410442507	0.658553213	0.55760358	0.282244552	0	0	0.022425114	0.154167164	0.54116317
03/08/20	3169	GBIF	PRESERVED_SPECIMEN	NY	1928760689	SPECIES	Theobroma	guianense	0	Theobroma guianense (Aubl.) J.F.Gmel.	Beck, H.T.; et al.	25	09/10/87	-0.86773	-52.569927	1928760689	20/11/20	Roraima province	53201	0	0	43085	139777	896304	0.718129529	0.831293225	0.219116842	0.046982118	0	0	0.038048619	0.123437896	0.791531367
03/08/20	2813	GBIF	PRESERVED_SPECIMEN	NY	1930878198	SPECIES	Theobroma	guianense	0	Theobroma guianense (Aubl.) J.F.Gmel.	Rosa, N.A. & Santos, M.R.	1786	20/04/77	-3.13424	-60.02153	1424167236	20/11/20	Imerí province	162096	0	0	27965	95764	796175	0.615719998	0.799432695	0.378651822	0.14981146	0	0	0.025845656	0.08850647	0.735836414
03/08/20	3265	GBIF	PRESERVED_SPECIMEN	NY	1928146609	SPECIES	Theobroma	guianense	0	Theobroma guianense (Aubl.) J.F.Gmel.	Pires, J.M.; et al.	50291	31/07/61	0.9010147	-52.0040853	1928146609	26/03/21	Roraima province	33251	0	0	22081	63321	1086942	0.790817119	0.854456842	0.172665138	0.027580572	0	0	0.018315438	0.052522613	0.901581377
03/08/20	3211	GBIF	PRESERVED_SPECIMEN	NY	1928475950	SPECIES	Theobroma	guianense	0	Theobroma guianense (Aubl.) J.F.Gmel.	Rabelo, B.V.; et al.	3138	01/01/85	1.35	-53.25	1928475950	26/03/21	Roraima province	0	0	0	0	0	0	0	0	0	NA	NA	NA	NA	NA	NA
03/08/20	3212	GBIF	PRESERVED_SPECIMEN	NY	1928467789	SPECIES	Theobroma	guianense	0	Theobroma guianense (Aubl.) J.F.Gmel.	Mori, S.A. & Cardoso, R.M.G.	17580	31/12/84	-1.35	-53.25	1928467789	24/03/21	Roraima province	117475	0	0	25209	111703	951172	0.669523588	0.825607061	0.333637434	0.097444422	0	0	0.020910631	0.092656602	0.788988345
03/08/20	2767	GBIF	PRESERVED_SPECIMEN	NY	1931227207	SPECIES	Theobroma	guianense	0	Theobroma guianense (Aubl.) J.F.Gmel.	Cowan, R.S.	38186	09/11/54	1.6495951	-52.2704484	1931227207	20/11/20	Roraima province	54616	0	0	38762	100867	1011350	0.764858366	0.868604302	0.216908861	0.045302112	0	0	0.032151759	0.083665742	0.838880387
03/08/20	3028	GBIF	PRESERVED_SPECIMEN	NY	1929620162	SPECIES	Theobroma	guianense	0	Theobroma guianense (Aubl.) J.F.Gmel.	Cid-Ferreira, C.A.; et al.	4975	02/07/84	-10.183333	-63.05	1424167201	20/11/20	Madeira province	3954	0	0	2049	55018	563596	0.737518221	0.746064544	0.140031196	0.006330279	0	0	0.00328041	0.088082777	0.902306533
03/08/20	3260	GBIF	PRESERVED_SPECIMEN	NY	1928200116	SPECIES	Theobroma	guianense	0	Theobroma guianense (Aubl.) J.F.Gmel.	Dionizia, F.; et al.	60	07/08/87	-8.7517	-63.4547	1928200116	26/03/21	Madeira province	65332	0	0	12157	73394	1041097	0.744790557	0.849641085	0.269602511	0.054809644	0	0	0.010198997	0.061573181	0.873418178
03/08/20	2990	GBIF	PRESERVED_SPECIMEN	NY	1929833356	SPECIES	Theobroma	guianense	0	Theobroma guianense (Aubl.) J.F.Gmel.	Nee, M.H.	34872	16/04/87	-9.666667	-65	1929833356	26/03/21	Madeira province	26109	0	0	8105	67946	1103426	0.765390724	0.822417706	0.173971524	0.021656688	0	0	0.006722872	0.056359314	0.915261126
03/08/20	3160	GBIF	PRESERVED_SPECIMEN	NY	1928819383	SPECIES	Theobroma	guianense	0	Theobroma guianense (Aubl.) J.F.Gmel.	Thomas, W.W.; et al.	6601	12/09/88	-9.1	-63.22	1928819383	26/03/21	Madeira province	49282	0	0	12119	120038	998433	0.725023605	0.811248779	0.21998986	0.041768938	0	0	0.010271453	0.101738155	0.846221455
03/08/20	2918	GBIF	PRESERVED_SPECIMEN	NY	1930274162	SPECIES	Theobroma	guianense	0	Theobroma guianense (Aubl.) J.F.Gmel.	Cid-Ferreira, C.A.; et al.	8640	23/03/87	-12.17	-63.42	1930074869	24/03/21	Madeira province	42795	0	0	33474	227885	901395	0.677594649	0.732371271	0.191215109	0.03549835	0	0	0.027766603	0.18903006	0.747704988
03/08/20	3007	GBIF	PRESERVED_SPECIMEN	NY	1929770128	SPECIES	Theobroma	speciosum	0	Theobroma sylvestre Mart.	Thomas, W.W.; et al.	6273	12/09/88	-9.1	-63.22	1929770128	13/04/21	Madeira province	49282	0	0	12119	120038	998433	0.725023605	0.811248779	0.21998986	0.041768938	0	0	0.010271453	0.101738155	0.846221455
03/08/20	2954	GBIF	PRESERVED_SPECIMEN	NY	1930064111	SPECIES	Theobroma	sylvestre	0	Theobroma sylvestre Mart.	Mori, S.; et al.	19511	31/10/88	-2.416667	-59.75	1930064111	13/04/21	Roraima province	65726	0	0	22028	65507	679081	0.705615266	0.831259936	0.271750876	0.078965137	0	0	0.026465083	0.078702024	0.815867756
03/08/20	2772	GBIF	PRESERVED_SPECIMEN	NY	1931184979	SPECIES	Theobroma	velutinum	0	Theobroma velutinum Benoist	Pires, J.M.; et al.	50921	14/09/61	0.95	-51.4833	1321668292	24/03/21	Roraima province	49185	0	0	42726	176257	630454	0.655765959	0.787424058	0.224660918	0.054733804	0	0	0.047546132	0.196141425	0.701578639
03/08/20	3097	GBIF	PRESERVED_SPECIMEN	NY	1929191583	SPECIES	Theobroma	sylvestre	0	Theobroma sylvestre Mart.	CoÃªlho, D.F.; et al.	96	16/11/85	-1.100486	-57.028484	1929191583	13/04/21	Roraima province	20771	0	0	16421	54133	895582	0.805162822	0.863636374	0.169231435	0.021046563	0	0	0.016638852	0.054851166	0.907463419
03/08/20	2865	GBIF	PRESERVED_SPECIMEN	NY	1930548995	SPECIES	Theobroma	speciosum	0	Theobroma speciosum Willd. ex Spreng.	Teixeira, L.O.A.; et al.	1339	23/06/82	-7.3629104	-62.4853886	1930548995	31/08/20	Madeira province	27005	0	0	7488	28659	1142447	0.825362651	0.871999979	0.187464122	0.022399654	0	0	0.00621102	0.023771586	0.94761774
03/08/20	3164	GBIF	PRESERVED_SPECIMEN	NY	1928790152	SPECIES	Theobroma	guianense	Theobroma guianense	Theobroma guianense (Aubl.) J.F.Gmel.	Pires, J.M.	8265	15/01/65	-1.2407437	-48.459403	1928790152	26/03/21	Pará province	340265	0	0	27035	185859	652409	0.410442507	0.658553213	0.55760358	0.282244552	0	0	0.022425114	0.154167164	0.54116317
03/08/20	2884	GBIF	PRESERVED_SPECIMEN	NY	1930446313	SPECIES	Theobroma	guianense	0	Theobroma guianense (Aubl.) J.F.Gmel.	Rosa, N.A. & Santos, M.R.	1827	23/04/77	-0.9266052	-52.4310383	1927962867	18/03/21	Roraima province	53201	0	0	43085	139777	896304	0.718129529	0.831293225	0.219116842	0.046982118	0	0	0.038048619	0.123437896	0.791531367
03/08/20	3224	GBIF	PRESERVED_SPECIMEN	NY	1928383272	SPECIES	Theobroma	speciosum	0	Theobroma speciosum Willd. ex Spreng.	Silva, M.G.	2845	22/01/77	-1.19399	-47.317595	1928383272	12/04/21	Pará province	11415	0	0	33034	151750	634399	0.710823879	0.774017304	0.196860698	0.01374311	0	0	0.039771345	0.182699693	0.763785851
03/08/20	2833	GBIF	PRESERVED_SPECIMEN	NY	1930782555	SPECIES	Theobroma	speciosum	0	Theobroma speciosum Willd. ex Spreng.	Dionizia, F.; et al.	87	10/08/87	-8.7654548	-63.9053508	1042494712	12/04/21	Madeira province	60088	0	0	39614	156457	751059	0.669723437	0.780144274	0.223469626	0.059657393	0	0	0.039330115	0.155335786	0.745676706
03/08/20	3233	GBIF	PRESERVED_SPECIMEN	NY	1928358266	SPECIES	Theobroma	velutinum	0	Theobroma velutinum Benoist	Oliveira, E.	4231	14/04/68	-0.892099	-52.492654	1928358266	13/04/21	Roraima province	53201	0	0	43085	139777	896304	0.718129529	0.831293225	0.219116842	0.046982118	0	0	0.038048619	0.123437896	0.791531367
03/08/20	3341	GBIF	PRESERVED_SPECIMEN	BHCB	1913569430	SPECIES	Theobroma	speciosum	0	Theobroma speciosum Willd. ex Spreng.	Rodrigues, I.M.C.; et al.	563	08/12/12	-6.458333	-50.325833	0	18/08/20	Xingu-Tapajós province	2822	0	0	1386	48489	1081128	0.791643101	0.813379288	0.111580926	0.00248892	0	0	0.001222411	0.042765859	0.95352281
03/08/20	3342	GBIF	PRESERVED_SPECIMEN	BHCB	1913568020	SPECIES	Theobroma	speciosum	0	Theobroma speciosum Willd. ex Spreng.	Almeida, T.E.; et al.	2532	03/09/10	-6.414167	-50.326944	0	18/08/20	Xingu-Tapajós province	26235	0	0	9226	31565	821447	0.809373608	0.873849273	0.174240312	0.029528191	0	0	0.010384108	0.035527247	0.924560454
03/08/20	3352	GBIF	PRESERVED_SPECIMEN	RB	1912807287	SPECIES	Theobroma	guianense	0	Theobroma guianense (Aubl.) J.F.Gmel.	Medeiros, T.K.A.; et al.	11	05/06/17	-10.801944	-64.971945	1912807287	20/11/20	Madeira province	19781	0	0	1686	41089	1143043	0.803792925	0.864366889	0.159686221	0.016407611	0	0	0.001398475	0.034081813	0.9481121
03/08/20	3359	GBIF	PRESERVED_SPECIMEN	COL	1898914842	SPECIES	Herrania	nitida	0	Herrania nitida (Poepp.) R.E.Schult.	Betancur-Betancur, J.C.	2280	//	1.6867982	-74.4644314	0	07/04/21	Imerí province	19634	0	0	22126	134119	882966	0.724992527	0.765533388	0.188196447	0.018542846	0	0	0.020896354	0.126665376	0.833895424
03/08/20	6080	GBIF	PRESERVED_SPECIMEN	US	1319312068	SPECIES	Theobroma	obovatum	0	Theobroma obovatum Klotzsch ex Bernoulli	VÃ¡squez, R. & Jaramillo, N.	4712	08/01/84	-5.0833333	-73.8333333	1319312068	05/10/20	Madeira province	61995	0	0	28661	103005	1011908	0.71553712	0.807957888	0.218287162	0.05142385	0	0	0.023773836	0.085440983	0.839361331
03/08/20	3366	GBIF	PRESERVED_SPECIMEN	COL	1898910692	SPECIES	Herrania	nitida	0	Herrania nitida (Poepp.) R.E.Schult.	Marulanda, O. & MÃ¡rquez, S.	1790	27/01/90	2.3540574	-71.9138491	1898910692	14/12/20	Imerí province	1651	0	0	855	33202	1072389	0.804116551	0.82057333	0.07596584	0.001489942	0	0	0.000771593	0.029963081	0.967775384
03/08/20	3370	GBIF	PRESERVED_SPECIMEN	COL	1898904629	SPECIES	Theobroma	obovatum	0	Theobroma obovatum Klotzsch ex Bernoulli	NarvÃ¡ez, L.H. & Olmos, J.R.	204	02/10/87	-3.815556	-70.280833	1898904629	25/09/20	Imerí province	51884	0	0	20991	72181	650100	0.692628188	0.798938602	0.245448333	0.065250089	0	0	0.026398593	0.090775898	0.817575419
03/08/20	3372	GBIF	PRESERVED_SPECIMEN	COL	1898894982	SPECIES	Theobroma	obovatum	0	Theobroma obovatum Klotzsch ex Bernoulli	L., H.N.R.	268	//	-3.204314	-70.323333	0	25/09/20	Imerí province	16479	0	0	15266	51977	757664	0.76209136	0.818768144	0.15173687	0.019585541	0	0	0.018143872	0.061775451	0.900495135
03/08/20	3373	GBIF	PRESERVED_SPECIMEN	COL	1898894796	SPECIES	Herrania	camargoana	0	Herrania camargoana R.E.Schult.	Bernal, R. & Hammel, B.E.	1310	19/11/86	1.37977	-78.1211	1898894796	07/04/21	Cauca province	0	0	0	0	0	0	0	0	0	NA	NA	NA	NA	NA	NA
03/08/20	3374	GBIF	PRESERVED_SPECIMEN	COL	1898894671	SPECIES	Theobroma	guianense	0	Theobroma guianense (Aubl.) J.F.Gmel.	NarvÃ¡ez, L.H. & Olmos, J.R.	321	06/10/87	-3.815556	-70.280833	1898894671	17/03/21	Imerí province	51884	0	0	20991	72181	650100	0.692628188	0.798938602	0.245448333	0.065250089	0	0	0.026398593	0.090775898	0.817575419
03/08/20	3376	GBIF	PRESERVED_SPECIMEN	COL	1898888370	SPECIES	Theobroma	gileri	0	Theobroma gileri Cuatrec.	Daly, D.C. & Acevedo-Rodriguez, P.	5148	08/05/87	0.866667	-78.483333	1898888370	18/09/20	Cauca province	0	0	0	0	0	0	0	0	0	NA	NA	NA	NA	NA	NA
03/08/20	14730	GBIF	PRESERVED_SPECIMEN	COAH	768740612	SPECIES	Theobroma	guianense	0	Theobroma guianense (Aubl.) J.F.Gmel.	CÃ¡rdenas, D.; et al.	7034	15/01/96	2.65	-71.12	768740612	28/12/20	Imerí province	14792	0	0	14379	60428	727752	0.786750849	0.855472267	0.179187338	0.018097488	0	0	0.017592197	0.073931518	0.890378797
03/08/20	14729	GBIF	PRESERVED_SPECIMEN	COAH	768740613	SPECIES	Theobroma	guianense	0	Theobroma guianense (Aubl.) J.F.Gmel.	CÃ¡rdenas, D.; et al.	7139	28/01/96	2.6	-71.14	768740613	25/09/20	Imerí province	3664	0	0	1584	8136	1046555	0.826658385	0.83768481	0.071108588	0.003456803	0	0	0.001494426	0.007675913	0.987372858
03/08/20	14711	GBIF	PRESERVED_SPECIMEN	COAH	768745132	SPECIES	Theobroma	guianense	0	Theobroma guianense (Aubl.) J.F.Gmel.	CÃ¡rdenas, D.; et al.	7992	22/07/97	-2.11	-69.56	768745132	28/12/20	Imerí province	18577	0	0	14845	57952	1114228	0.782026357	0.829443455	0.160428359	0.015408899	0	0	0.012313351	0.048068932	0.924208818
03/08/20	12933	GBIF	PRESERVED_SPECIMEN	COAH	1147294844	SPECIES	Theobroma	obovatum	0	Theobroma obovatum Klotzsch ex Bernoulli	CÃ¡rdenas, D.; et al.	8021	22/07/97	-2.11	-69.56	1147294844	25/09/20	Imerí province	18577	0	0	14845	57952	1114228	0.782026357	0.829443455	0.160428359	0.015408899	0	0	0.012313351	0.048068932	0.924208818
03/08/20	3382	GBIF	PRESERVED_SPECIMEN	COL	1898876233	SPECIES	Theobroma	obovatum	0	Theobroma obovatum Klotzsch ex Bernoulli	Torres, J.H.; et al.	3242	16/04/86	0.2284202	-73.2759721	1898876233	25/09/20	Imerí province	4180	0	0	630	3102	1197688	0.84461434	0.850600839	0.074291343	0.003467153	0	0	0.000522561	0.002572993	0.993437293
03/08/20	3385	GBIF	PRESERVED_SPECIMEN	COL	1898873803	SPECIES	Theobroma	hylaeum	0	Theobroma hylaeum Cuatrec.	Rotta, C.L. & Martinez, H.	679	03/06/85	5.1008175	-76.4877916	1898873803	29/10/20	Cauca province	0	0	0	0	0	0	0	0	0	NA	NA	NA	NA	NA	NA
03/08/20	3388	GBIF	PRESERVED_SPECIMEN	COL	1898869679	SPECIES	Herrania	mariae	0	Herrania mariae (Mart.) Decne. ex Goudot	Schultes, R.E.	22567	01/07/60	1.09346	-76.62297	1898869679	07/04/21	Napo province	0	0	0	0	0	0	0	0	0	NA	NA	NA	NA	NA	NA
03/08/20	3391	GBIF	PRESERVED_SPECIMEN	COL	1898866900	VARIETY	Herrania	pulcherrima	Herrania balaensis	Herrania pulcherrima Goudot	Schultes, R.E. & Villarreal, M.	7324	19/05/46	3.8857509	-76.8976165	1898866900	14/12/20	Pacific dominion	0	0	0	0	0	0	0	0	0	NA	NA	NA	NA	NA	NA
03/08/20	3393	GBIF	PRESERVED_SPECIMEN	COL	1898866837	SPECIES	Herrania	nitida	0	Herrania nitida (Poepp.) R.E.Schult.	Schultes, R.E.	6000	01/09/44	-4.21	-69.95	1898866837	07/04/21	Imerí province	60898	0	0	29641	105817	608931	0.689182291	0.8391155	0.292874337	0.075622728	0	0	0.036807995	0.131402841	0.756166435
03/08/20	3394	GBIF	PRESERVED_SPECIMEN	COL	1898866827	SPECIES	Herrania	nitida	0	Herrania nitida (Poepp.) R.E.Schult.	Schultes, R.E.	6537	20/09/45	-4.023249	-70.119796	1317754826	07/04/21	Imerí province	60898	0	0	29641	105817	608931	0.689182291	0.8391155	0.292874337	0.075622728	0	0	0.036807995	0.131402841	0.756166435
03/08/20	3399	GBIF	PRESERVED_SPECIMEN	COL	1898866792	SPECIES	Herrania	nitida	0	Herrania nitida (Poepp.) R.E.Schult.	Schultes, R.E.	5876	05/04/44	-1.319734	-69.587739	1898866792	07/04/21	Imerí province	31706	0	0	1182	5893	1116266	0.800548636	0.841839969	0.223691472	0.027449965	0	0	0.001023335	0.005101957	0.966424743
03/08/20	3405	GBIF	PRESERVED_SPECIMEN	COL	1898866755	SPECIES	Herrania	nitida	0	Herrania nitida (Poepp.) R.E.Schult.	Schultes, R.E.	6192A	/9-11/1944	-3.6675118	-70.0281176	1228204005	07/04/21	Imerí province	20325	0	0	16505	49152	465983	0.722227264	0.807436943	0.196958992	0.036822987	0	0	0.029902258	0.089049124	0.84422563
03/08/20	3406	GBIF	PRESERVED_SPECIMEN	COL	1898866732	SPECIES	Herrania	nycterodendron	0	Herrania nycterodendron R.E.Schult.	Schultes, R.E.	6017	01/09/44	-4.21	-69.95	1898866732	07/04/21	Imerí province	60898	0	0	29641	105817	608931	0.689182291	0.8391155	0.292874337	0.075622728	0	0	0.036807995	0.131402841	0.756166435
03/08/20	2276	GBIF	PRESERVED_SPECIMEN	ECON	1999352435	VARIETY	Herrania	mariae	0	Herrania mariae Goudot	Schultes, R.E.	4010	20/06/42	0	0	1998766013	04/05/21	0	0	0	0	0	0	0	0	0	0	NA	NA	NA	NA	NA	NA
03/08/20	3412	GBIF	PRESERVED_SPECIMEN	RB	1898863119	SPECIES	Theobroma	guianense	0	Theobroma guianense (Aubl.) J.F.Gmel.	Goldenberg, R. & P.h.labiak, R.C.F.P.P.L.S.-S.G.	2476	19/05/18	-9.0225	-58.618056	1898863119	26/03/21	Madeira province	11247	0	0	2866	10465	1179528	0.870689724	0.893175066	0.138094813	0.00934054	0	0	0.002380189	0.008691095	0.979588176
03/08/20	3413	GBIF	PRESERVED_SPECIMEN	RB	1898862942	SPECIES	Theobroma	guianense	0	Theobroma guianense (Aubl.) J.F.Gmel.	Forzza, R.C.; et al.	9779	17/05/18	-8.960556	-58.545	1898862942	26/03/21	Madeira province	11247	0	0	2866	10465	1179528	0.870689724	0.893175066	0.138094813	0.00934054	0	0	0.002380189	0.008691095	0.979588176
03/08/20	3470	GBIF	PRESERVED_SPECIMEN	ENCB	1896080211	SPECIES	Herrania	purpurea	0	Herrania purpurea (Pittier) R.E.Schult.	Stevens, W.D.	s.n.	29/10/77	11.623056	-84.361389	0	08/12/20	Mesoamerica	0	0	0	0	0	0	0	0	0	NA	NA	NA	NA	NA	NA
03/08/20	3471	GBIF	PRESERVED_SPECIMEN	ENCB	1896080200	SPECIES	Herrania	purpurea	0	Herrania purpurea (Pittier) R.E.Schult.	Forero	s.n.	03/06/76	7.435	-77.105278	0	08/12/20	Pacific dominion	0	0	0	0	0	0	0	0	0	NA	NA	NA	NA	NA	NA
03/08/20	3480	GBIF	PRESERVED_SPECIMEN	ENCB	1896066642	SPECIES	Theobroma	glaucum	0	Theobroma glaucum H.Karst.	Correa, M.D.; et al.	s.n.	09/01/73	9.2325	-78.994167	0	11/09/20	Pacific dominion	0	0	0	0	0	0	0	0	0	NA	NA	NA	NA	NA	NA
03/08/20	12942	GBIF	PRESERVED_SPECIMEN	COAH	1147292827	SPECIES	Theobroma	obovatum	0	Theobroma obovatum Klotzsch ex Bernoulli	Ãlvarez, E.; et al.	32	24/09/90	-0.6	-72.16	1147292827	25/09/20	Imerí province	62231	0	0	23542	44120	924092	0.755338907	0.836630523	0.226952747	0.059043535	0	0	0.022336181	0.041860178	0.876760106
03/08/20	14738	GBIF	PRESERVED_SPECIMEN	COAH	768735697	SPECIES	Herrania	nitida	0	Herrania nitida (Poepp.) R.E.Schult.	Alvarez, E.; et al.	1201	23/10/90	-0.6	-72.16	768735697	07/04/21	Imerí province	62231	0	0	23542	44120	924092	0.755338907	0.836630523	0.226952747	0.059043535	0	0	0.022336181	0.041860178	0.876760106
03/08/20	12939	GBIF	PRESERVED_SPECIMEN	COAH	1147293065	SPECIES	Theobroma	guianense	0	Theobroma guianense (Aubl.) J.F.Gmel.	Vester, H. & Matapi, A.	258	26/02/91	-0.61	-72.34	1147293065	28/12/20	Imerí province	12200	0	0	901	26466	1166027	0.799760414	0.824206471	0.120056907	0.010119493	0	0	0.000747349	0.021952664	0.967180494
03/08/20	2733	GBIF	PRESERVED_SPECIMEN	COAH	1932875008	SPECIES	Herrania	nitida	0	Herrania nitida (Poepp.) R.E.Schult.	Duivenvoorden, J.	1442	23/11/91	-0.83	-71.83	1932875008	07/04/21	Imerí province	9796	0	0	852	5264	1056454	0.820015111	0.835764468	0.126346866	0.009134941	0	0	0.000794505	0.004908772	0.985161782
03/08/20	3559	GBIF	PRESERVED_SPECIMEN	COL	1891007154	SPECIES	Theobroma	guianense	0	Theobroma guianense (Aubl.) J.F.Gmel.	Rotta, C.L.	556	16/11/84	-1.08	-71.08	1891007154	08/03/21	Imerí province	88097	0	0	47170	147662	922640	0.679909735	0.816195369	0.2630014	0.073075038	0	0	0.039126753	0.122483242	0.765314967
03/08/20	3564	GBIF	PRESERVED_SPECIMEN	COL	1891006541	SPECIES	Herrania	nitida	Herrania aspera	Herrania nitida (Poepp.) R.E.Schult.	Tellez, S.	105	05/03/87	4.458958	-73.396695	1891006541	07/04/21	Pacific dominion	2904	0	0	1459	60292	406236	0.731518397	0.753369272	0.14058142	0.006167032	0	0	0.003098382	0.128038123	0.862696463
03/08/20	11318	GBIF	PRESERVED_SPECIMEN	MO	1259171354	SPECIES	Theobroma	glaucum	0	Theobroma glaucum H.Karst.	Rudas, A.; et al.	4464	30/06/92	-3.03333	-70	1707550240	04/09/20	Imerí province	4364	0	0	402	1246	546949	0.830305596	0.842488408	0.112975706	0.007892057	0	0	0.000726995	0.002253323	0.989127624
03/08/20	3566	GBIF	PRESERVED_SPECIMEN	COL	1891005648	SPECIES	Herrania	pulcherrima	0	Herrania pulcherrima Goudot	Cogollo, A.	847	26/10/83	5.93572	-74.84932	1891005648	09/11/20	Magdalena province	31946	0	0	13044	275986	884611	0.685555121	0.736332417	0.187832974	0.026498295	0	0	0.010819626	0.228922508	0.733759571
03/08/20	6630	GBIF	PRESERVED_SPECIMEN	US	1317244862	SPECIES	Theobroma	glaucum	0	Theobroma glaucum H.Karst.	s.c.	8525	30/05/82	-0.5166667	-76.3833333	1317244862	07/09/20	Napo province	23147	0	0	6179	27192	1149029	0.816607505	0.854238331	0.146636219	0.019200413	0	0	0.005125474	0.022555736	0.953118377
03/08/20	3569	GBIF	PRESERVED_SPECIMEN	COL	1891005628	SPECIES	Herrania	purpurea	0	Herrania purpurea (Pittier) R.E.Schult.	Alvaro-Cogollo, P.	1415	07/03/84	5.883333	-74.650002	1891005628	08/12/20	Magdalena province	31946	0	0	13044	275986	884611	0.685555121	0.736332417	0.187832974	0.026498295	0	0	0.010819626	0.228922508	0.733759571
03/08/20	3571	GBIF	PRESERVED_SPECIMEN	COL	1890996474	SPECIES	Herrania	purpurea	0	Herrania purpurea (Pittier) R.E.Schult.	Brand, J. & Cogollo, A.	209	25/09/81	7.616667	-76.650002	1890996474	08/12/20	Pacific dominion	0	0	0	0	0	0	0	0	0	NA	NA	NA	NA	NA	NA
03/08/20	3572	GBIF	PRESERVED_SPECIMEN	COL	1890995847	SPECIES	Herrania	purpurea	0	Herrania purpurea (Pittier) R.E.Schult.	Renteria, E.; et al.	1786	19/09/79	6.51855	-74.107086	1890995847	09/11/20	Magdalena province	81176	0	0	55410	328746	740243	0.614404386	0.664611578	0.224985237	0.067333845	0	0	0.045961471	0.272688136	0.614016548
03/08/20	3573	GBIF	PRESERVED_SPECIMEN	COL	1890995561	SPECIES	Herrania	albiflora	0	Herrania albiflora Goudot	Renteria, E.; et al.	2372	20/06/80	7.083611	-74.703613	1890995561	09/11/20	Magdalena province	81176	0	0	55410	328746	740243	0.614404386	0.664611578	0.224985237	0.067333845	0	0	0.045961471	0.272688136	0.614016548
03/08/20	4147	GBIF	PRESERVED_SPECIMEN	FMB	1707538375	SPECIES	Herrania	purpurea	0	Herrania purpurea (Pittier) R.E.Schult.	Warner, P.	310	07/03/74	9.5117587	-75.3623271	1707538375	07/06/21	Magdalena province	238065	0	0	41983	417872	507316	0.443032984	0.547268271	0.372302785	0.19752563	0	0	0.034833842	0.346713839	0.42092669
03/08/20	3582	GBIF	PRESERVED_SPECIMEN	COL	1890985239	SPECIES	Herrania	pulcherrima	0	Herrania pulcherrima Goudot	Lopez, L.E.	83-0726	23/11/83	1.5828831	-78.663242	0	14/12/20	Pacific dominion	0	0	0	0	0	0	0	0	0	NA	NA	NA	NA	NA	NA
03/08/20	3598	GBIF	PRESERVED_SPECIMEN	COL	1890959549	FORM	Herrania	albiflora	0	Herrania albiflora Goudot f. titanica R.E.Schultes	Richter, L.	s.n.	28/06/45	6.2188333	-73.8097264	1890959549	09/11/20	Magdalena province	22252	0	0	18407	140614	986764	0.727420374	0.778783977	0.165468157	0.019050766	0	0	0.015758919	0.120384885	0.84480543
03/08/20	3584	GBIF	PRESERVED_SPECIMEN	COL	1890984007	SPECIES	Theobroma	guianense	0	Theobroma guianense (Aubl.) J.F.Gmel.	Rotta, C.L.	80	09/11/81	-0.65	-72.3	1890984007	22/10/20	Imerí province	4659	0	0	243	683	378187	0.851557101	0.867432952	0.130050374	0.012140021	0	0	0.000633188	0.001779703	0.985447088
03/08/20	3588	GBIF	PRESERVED_SPECIMEN	COL	1890974371	SPECIES	Herrania	cuatrecasana	0	Herrania cuatrecasana GarcÃ­a-Barr.	Gentry, A.H. & Juncosa, A.	40970	05/03/83	6.26771	-77.38662	1317261189	07/04/21	0	765576	0	0	13218	35179	220335	0.099879589	-0.118749999	0.38265793	0.740181841	0	0	0.012779559	0.034012112	0.213026487
03/08/20	3591	GBIF	PRESERVED_SPECIMEN	COL	1890968364	SPECIES	Herrania	pulcherrima	0	Herrania pulcherrima Goudot	Fernandez-Perez, A.	6209	28/03/64	5.98753856	-76.97104074	1890968364	14/12/20	Pacific dominion	0	0	0	0	0	0	0	0	0	NA	NA	NA	NA	NA	NA
03/08/20	3594	GBIF	PRESERVED_SPECIMEN	COL	1890964122	SPECIES	Theobroma	guianense	0	Theobroma guianense (Aubl.) J.F.Gmel.	Djaja, D.; et al.	2457	29/03/70	1.2521739	-70.233618	1424762740	08/03/21	Imerí province	75911	0	0	40117	107986	981565	0.719185101	0.829501212	0.22863303	0.062966425	0	0	0.033276127	0.089571899	0.814185549
03/08/20	3583	GBIF	PRESERVED_SPECIMEN	COL	1890985216	SPECIES	Herrania	albiflora	0	Herrania albiflora Goudot	Lopez, L.E.	83-0762	14/12/83	5.6046282	-77.0697514	1890985216	07/04/21	Pacific dominion	0	0	0	0	0	0	0	0	0	NA	NA	NA	NA	NA	NA
03/08/20	3599	GBIF	PRESERVED_SPECIMEN	COL	1890958604	SPECIES	Herrania	pulcherrima	0	Herrania pulcherrima Goudot	Garcia-Barriga, H.	12469	02/08/47	5.2437975	-74.3181864	1890958604	14/12/20	Magdalena province	82000	0	0	67864	372422	683258	0.580985662	0.638953388	0.218157803	0.068019085	0	0	0.056293258	0.308924436	0.566763221
03/08/20	3602	GBIF	PRESERVED_SPECIMEN	COL	1890935972	SPECIES	Herrania	pulcherrima	0	Herrania pulcherrima Goudot	Forero, E.; et al.	6548	03/03/80	4.885278	-76.280278	1260432697	10/11/20	Cauca province	0	0	0	0	0	0	0	0	0	NA	NA	NA	NA	NA	NA
03/08/20	3604	GBIF	PRESERVED_SPECIMEN	COL	1890930688	SPECIES	Herrania	purpurea	0	Herrania purpurea (Pittier) R.E.Schult.	Alverson, W.S.; et al.	63	21/02/77	7.214977	-75.05217	1890930688	08/12/20	Magdalena province	39809	0	0	14173	60307	742719	0.713804196	0.77106601	0.192969382	0.046451142	0	0	0.016537769	0.070369238	0.866641852
03/08/20	3606	GBIF	PRESERVED_SPECIMEN	COL	1890919978	SPECIES	Herrania	pulcherrima	0	Herrania pulcherrima Goudot	Forero, E.; et al.	4579	04/04/79	4.7	-76.916664	1890919978	14/12/20	Pacific dominion	0	0	0	0	0	0	0	0	0	NA	NA	NA	NA	NA	NA
03/08/20	3610	GBIF	PRESERVED_SPECIMEN	COL	1890917454	SPECIES	Herrania	pulcherrima	0	Herrania pulcherrima Goudot	Forero, E.; et al.	5688	23/04/79	5.583333	-76.949997	1890917454	14/12/20	Pacific dominion	0	0	0	0	0	0	0	0	0	NA	NA	NA	NA	NA	NA
03/08/20	3614	GBIF	PRESERVED_SPECIMEN	COL	1890915027	SPECIES	Herrania	pulcherrima	0	Herrania pulcherrima Goudot	Forero, E.; et al.	4160	28/03/79	4.166667	-77.166664	1890915027	14/12/20	Pacific dominion	0	0	0	0	0	0	0	0	0	NA	NA	NA	NA	NA	NA
03/08/20	3616	GBIF	PRESERVED_SPECIMEN	COL	1890914506	SPECIES	Theobroma	hylaeum	0	Theobroma hylaeum Cuatrec.	Gonzalez, E.F.	1512	04/05/75	0	0	0	29/10/20	0	0	0	0	0	0	0	0	0	0	NA	NA	NA	NA	NA	NA
03/08/20	3617	GBIF	PRESERVED_SPECIMEN	COL	1890913411	SPECIES	Theobroma	chocoense	0	Theobroma chocoense Cuatrec.	Cuatrecasas, J. & PatiÃ±o, V.M.	27457	21/02/69	3.869426533	-76.52905107	1890913411	22/10/20	Cauca province	0	0	0	0	0	0	0	0	0	NA	NA	NA	NA	NA	NA
03/08/20	3618	GBIF	PRESERVED_SPECIMEN	COL	1890902377	SPECIES	Herrania	purpurea	0	Herrania purpurea (Pittier) R.E.Schult.	0	685	14/12/76	7.216667	-75.050003	0	08/12/20	Magdalena province	39809	0	0	14173	60307	742719	0.713804196	0.77106601	0.192969382	0.046451142	0	0	0.016537769	0.070369238	0.866641852
03/08/20	3620	GBIF	PRESERVED_SPECIMEN	COL	1890898518	SPECIES	Herrania	umbratica	0	Herrania umbratica R.E.Schult.	Ortiz, J.M.	s.n.	01/04/43	7.08033	-73.2019	1890898518	09/11/20	Magdalena province	31802	0	0	21162	172975	979639	0.709621319	0.770133555	0.197063739	0.026379048	0	0	0.017553406	0.143478896	0.81258865
03/08/20	3640	GBIF	PRESERVED_SPECIMEN	HERBAM	1889177899	SPECIES	Theobroma	speciosum	0	Theobroma speciosum Willd. ex Spreng.	Rodrigues, L.; et al.	1181276	16/06/16	-10.202833	-55.298056	0	18/08/20	Madeira province	16384	0	0	20218	205495	963501	0.708709803	0.73475042	0.178713402	0.013589936	0	0	0.016770101	0.170450681	0.799189282
03/08/20	3641	GBIF	PRESERVED_SPECIMEN	HERBAM	1889177795	SPECIES	Theobroma	speciosum	0	Theobroma speciosum Willd. ex Spreng.	Rodrigues, L.; et al.	501178	12/03/16	-9.894444	-5.912322	0	18/08/20	0	0	0	0	0	0	0	0	0	0	NA	NA	NA	NA	NA	NA
03/08/20	3642	GBIF	PRESERVED_SPECIMEN	HERBAM	1889177619	SPECIES	Theobroma	speciosum	0	Theobroma speciosum Willd. ex Spreng.	Silva, D.R.; et al.	98	27/07/16	-9.584556	-55.918361	0	18/08/20	Madeira province	29928	0	0	24661	156771	994240	0.74467739	0.832996607	0.195749733	0.024824154	0	0	0.020455375	0.130035667	0.824684804
03/08/20	3643	GBIF	PRESERVED_SPECIMEN	HERBAM	1889177617	SPECIES	Theobroma	speciosum	0	Theobroma speciosum Willd. ex Spreng.	Silva, D.R.; et al.	92	25/07/16	-9.586667	-55.919778	0	18/08/20	Madeira province	29928	0	0	24661	156771	994240	0.74467739	0.832996607	0.195749733	0.024824154	0	0	0.020455375	0.130035667	0.824684804
03/08/20	3084	GBIF	PRESERVED_SPECIMEN	NY	1929243317	SPECIES	Theobroma	sylvestre	0	Theobroma sylvestre Mart.	AssunÃ§Ã£o, P.A.C.L.; et al.	INPA/WWF_3209.2887	20/10/87	-2.4	-59.92	1929243317	13/04/21	Roraima province	6545	0	0	20154	114886	468460	0.71438405	0.820109963	0.181457055	0.010728717	0	0	0.033036907	0.188323812	0.767910564
03/08/20	3650	GBIF	PRESERVED_SPECIMEN	HERBAM	1889176966	SPECIES	Theobroma	guianense	0	Theobroma guianense (Aubl.) J.F.Gmel.	Lage, L.A.	1	16/01/16	-9.191389	-56.998333	0	17/03/21	Madeira province	26948	0	0	11757	92463	636523	0.741479985	0.838691771	0.226029984	0.035102665	0	0	0.015314756	0.120442991	0.829139589
03/08/20	3651	GBIF	PRESERVED_SPECIMEN	HERBAM	1889176926	SPECIES	Theobroma	guianense	0	Theobroma guianense (Aubl.) J.F.Gmel.	Rodrigues, L.; et al.	1711168	21/01/16	-9.796111	-55.870583	0	17/03/21	Madeira province	29928	0	0	24661	156771	994240	0.74467739	0.832996607	0.195749733	0.024824154	0	0	0.020455375	0.130035667	0.824684804
03/08/20	3652	GBIF	PRESERVED_SPECIMEN	HERBAM	1889176766	SPECIES	Theobroma	speciosum	0	Theobroma speciosum Willd. ex Spreng.	Rodrigues, L.; et al.	24939	28/08/15	-10.114778	-55.657444	0	18/08/20	Madeira province	16384	0	0	20218	205495	963501	0.708709803	0.73475042	0.178713402	0.013589936	0	0	0.016770101	0.170450681	0.799189282
03/08/20	3653	GBIF	PRESERVED_SPECIMEN	HERBAM	1889176333	SPECIES	Theobroma	speciosum	0	Theobroma speciosum Willd. ex Spreng.	Rodrigues, L.; et al.	45446	09/07/14	-9.992389	-56.247278	0	18/08/20	Xingu-Tapajós province	9555	0	0	6085	45252	663961	0.789473016	0.859275043	0.169999362	0.013181983	0	0	0.008394806	0.06242921	0.915994002
03/08/20	3654	GBIF	PRESERVED_SPECIMEN	HERBAM	1889176252	SPECIES	Theobroma	speciosum	0	Theobroma speciosum Willd. ex Spreng.	Rodrigues, L.; et al.	49549	18/08/14	-10.367528	-56.327389	0	18/08/20	Xingu-Tapajós province	14943	0	0	19981	100178	832031	0.75817042	0.8357867	0.169404905	0.015450822	0	0	0.020660033	0.103582444	0.8603067
03/08/20	3655	GBIF	PRESERVED_SPECIMEN	HERBAM	1889176232	SPECIES	Theobroma	speciosum	0	Theobroma speciosum Willd. ex Spreng.	Rodrigues, L.; et al.	1141302	01/07/16	-10.456333	-55.183139	0	18/08/20	Madeira province	16384	0	0	20218	205495	963501	0.708709803	0.73475042	0.178713402	0.013589936	0	0	0.016770101	0.170450681	0.799189282
03/08/20	3656	GBIF	PRESERVED_SPECIMEN	HERBAM	1889175779	SPECIES	Theobroma	guianense	0	Theobroma guianense (Aubl.) J.F.Gmel.	Soares-Lopes, C.R.A.; et al.	CL-3028228	22/12/14	50.458889	-8856.83611	0	17/03/21	0	813981	0	0	185419	154501	48544	0.113861658	0.089352958	0.230492721	0.676938238	0	0	0.154201647	0.128489037	0.040371077
03/08/20	3657	GBIF	PRESERVED_SPECIMEN	HERBAM	1889175309	SPECIES	Theobroma	speciosum	0	Theobroma speciosum Willd. ex Spreng.	Soares-Lopes, C.R.A.; et al.	EB-797795	08/07/14	50.484444	-8859.10278	0	13/08/20	0	887264	0	0	88142	105739	124294	0.081387093	0.042072456	0.306023124	0.736050518	0	0	0.073120249	0.08771825	0.103110983
03/08/20	3668	GBIF	PRESERVED_SPECIMEN	RB	1884025927	SPECIES	Theobroma	guianense	0	Theobroma guianense (Aubl.) J.F.Gmel.	Castro, W.; et al.	2243-A	15/09/17	-1.811389	-59.264722	1884025927	26/03/21	Roraima province	116719	0	0	35687	91247	961784	0.691262024	0.82510221	0.26579304	0.096827126	0	0	0.029605031	0.0756962	0.797871643
03/08/20	3669	GBIF	PRESERVED_SPECIMEN	RB	1884025909	SPECIES	Theobroma	guianense	0	Theobroma guianense (Aubl.) J.F.Gmel.	Castro, W.; et al.	2236-A	15/09/17	-1.529444	-59.456389	1884025909	20/11/20	Roraima province	118132	0	0	18732	49324	394418	0.572277342	0.830633044	0.425114684	0.203463278	0	0	0.032262843	0.084952618	0.679321261
03/08/20	3671	GBIF	PRESERVED_SPECIMEN	RB	1884025872	SPECIES	Theobroma	sylvestre	0	Theobroma sylvestre Mart.	Castro, W.; et al.	2239-A	15/09/17	-1.529444	-59.456389	0	13/04/21	Roraima province	118132	0	0	18732	49324	394418	0.572277342	0.830633044	0.425114684	0.203463278	0	0	0.032262843	0.084952618	0.679321261
03/08/20	3672	GBIF	PRESERVED_SPECIMEN	RB	1884025862	SPECIES	Theobroma	obovatum	0	Theobroma obovatum Klotzsch ex Bernoulli	Castro, W.; et al.	2240-A	15/09/17	-1.529444	-59.456389	1884025862	12/04/21	Roraima province	118132	0	0	18732	49324	394418	0.572277342	0.830633044	0.425114684	0.203463278	0	0	0.032262843	0.084952618	0.679321261
03/08/20	2978	GBIF	PRESERVED_SPECIMEN	NY	1929897653	SPECIES	Theobroma	sylvestre	0	Theobroma sylvestre Mart.	Cid-Ferreira, C.A.; et al.	6765	14/03/86	-0.5	-59.5	1929897653	27/08/20	Roraima province	3079	0	0	338	1981	1076647	0.865866024	0.873015881	0.065142227	0.002845538	0	0	0.000312371	0.001830793	0.995011298
03/08/20	3682	GBIF	PRESERVED_SPECIMEN	RB	1852375139	SPECIES	Theobroma	guianense	0	Theobroma guianense (Aubl.) J.F.Gmel.	Castro, W.; et al.	2954	22/10/17	-8.983333	-58.6075	1852375139	26/03/21	Madeira province	11247	0	0	2866	10465	1179528	0.870689724	0.893175066	0.138094813	0.00934054	0	0	0.002380189	0.008691095	0.979588176
03/08/20	3683	GBIF	PRESERVED_SPECIMEN	RB	1852375107	SPECIES	Theobroma	guianense	0	Theobroma guianense (Aubl.) J.F.Gmel.	Castro, W.; et al.	2885	22/10/17	-8.982222	-58.606944	1852375107	26/03/21	Madeira province	11247	0	0	2866	10465	1179528	0.870689724	0.893175066	0.138094813	0.00934054	0	0	0.002380189	0.008691095	0.979588176
03/08/20	3684	GBIF	PRESERVED_SPECIMEN	RB	1852375066	SPECIES	Theobroma	sylvestre	0	Theobroma sylvestre Mart.	Castro, W.; et al.	3267	15/11/17	-5.675278	-50.319167	0	13/04/21	Xingu-Tapajós province	6037	0	0	1579	18682	869982	0.855749315	0.893969536	0.114010293	0.006735618	0	0	0.001761726	0.020843933	0.970658723
03/08/20	3253	GBIF	PRESERVED_SPECIMEN	NY	1928235724	SPECIES	Herrania	nycterodendron	Herrania atrorubens	Herrania nycterodendron R.E.Schult.	Bahia, R.P.	45	15/08/78	-3.2014301	-52.2093477	1928235724	26/04/21	Xingu-Tapajós province	65347	0	0	5757	176970	773917	0.688004111	0.791157126	0.288686112	0.063940876	0	0	0.005633122	0.173161995	0.757264007
03/08/20	3689	GBIF	PRESERVED_SPECIMEN	RB	1852374988	SPECIES	Theobroma	guianense	0	Theobroma guianense (Aubl.) J.F.Gmel.	Castro, W.; et al.	2676	17/10/17	-9.021667	-58.618056	1852374988	26/03/21	Madeira province	11247	0	0	2866	10465	1179528	0.870689724	0.893175066	0.138094813	0.00934054	0	0	0.002380189	0.008691095	0.979588176
03/08/20	3002	GBIF	PRESERVED_SPECIMEN	NY	1929789828	SPECIES	Herrania	nitida	Herrania atrorubens	Herrania nitida (Poepp.) R.E.Schult.	Anderson, A.B.; et al.	1139	08/10/84	-1.4166667	-48.45	1929789828	26/04/21	Pará province	340265	0	0	27035	185859	652409	0.410442507	0.658553213	0.55760358	0.282244552	0	0	0.022425114	0.154167164	0.54116317
03/08/20	3693	GBIF	PRESERVED_SPECIMEN	RB	1852374922	SPECIES	Theobroma	sylvestre	0	Theobroma sylvestre Mart.	Castro, W.; et al.	2492	18/09/17	-1.811389	-59.264722	1852374922	18/08/20	Roraima province	116719	0	0	35687	91247	961784	0.691262024	0.82510221	0.26579304	0.096827126	0	0	0.029605031	0.0756962	0.797871643
03/08/20	3699	GBIF	PRESERVED_SPECIMEN	RB	1852374628	SPECIES	Theobroma	obovatum	0	Theobroma obovatum Klotzsch ex Bernoulli	Castro, W.; et al.	2200	20/08/17	-9.590555	-61.650556	1852374628	12/04/21	Madeira province	1118	0	0	1769	13121	647290	0.84399394	0.864432573	0.079292308	0.001685517	0	0	0.002666976	0.019781456	0.975866051
03/08/20	3700	GBIF	PRESERVED_SPECIMEN	RB	1852374553	SPECIES	Theobroma	guianense	0	Theobroma guianense (Aubl.) J.F.Gmel.	Castro, W.; Oliveira, E.C.; Cunha-Neto, J.P.; Martins, J.C.; Silva, L.S.	2205	20/08/17	-9.590555	-61.650556	1852374553	20/11/20	Madeira province	1118	0	0	1769	13121	647290	0.84399394	0.864432573	0.079292308	0.001685517	0	0	0.002666976	0.019781456	0.975866051
03/08/20	3701	GBIF	PRESERVED_SPECIMEN	RB	1852374550	SPECIES	Theobroma	guianense	0	Theobroma guianense (Aubl.) J.F.Gmel.	Castro, W.; et al.	2770	20/10/17	-8.960278	-58.544167	0	20/11/20	Madeira province	11247	0	0	2866	10465	1179528	0.870689724	0.893175066	0.138094813	0.00934054	0	0	0.002380189	0.008691095	0.979588176
03/08/20	3702	GBIF	PRESERVED_SPECIMEN	RB	1852374504	SPECIES	Theobroma	guianense	0	Theobroma guianense (Aubl.) J.F.Gmel.	Castro, W.; et al.	2696	17/10/17	-9.0225	-58.618611	1852374504	20/11/20	Madeira province	11247	0	0	2866	10465	1179528	0.870689724	0.893175066	0.138094813	0.00934054	0	0	0.002380189	0.008691095	0.979588176
03/08/20	3703	GBIF	PRESERVED_SPECIMEN	RB	1852374428	SPECIES	Theobroma	guianense	0	Theobroma guianense (Aubl.) J.F.Gmel.	Castro, W.; et al.	2048	16/08/17	-9.691944	-61.678889	1852374428	20/11/20	Madeira province	22677	0	0	19491	92091	685306	0.743803482	0.840688109	0.193501191	0.027669556	0	0	0.023782128	0.112365706	0.836182609
03/08/20	3064	GBIF	PRESERVED_SPECIMEN	NY	1929366117	SPECIES	Herrania	nitida	0	Herrania nitida (Poepp.) R.E.Schult.	Amaral, I.L.; et al.	297	03/11/82	-1.836248	-66.87674	1929366117	26/04/21	Imerí province	89430	0	0	11751	50648	1053608	0.740104898	0.848897517	0.289151971	0.074188863	0	0	0.009748332	0.042016298	0.874046508
03/08/20	3706	GBIF	PRESERVED_SPECIMEN	RB	1852374325	SPECIES	Theobroma	guianense	0	Theobroma guianense (Aubl.) J.F.Gmel.	Castro, W.; et al.	1874	13/08/17	-9.635278	-61.643611	1852374325	26/03/21	Madeira province	1118	0	0	1769	13121	647290	0.84399394	0.864432573	0.079292308	0.001685517	0	0	0.002666976	0.019781456	0.975866051
03/08/20	2793	GBIF	PRESERVED_SPECIMEN	NY	1931061395	SPECIES	Theobroma	speciosum	0	Theobroma speciosum Willd. ex Spreng.	Simon, M.F.; et al.	1682	09/10/12	-9.5272222	-64.8172222	1095258886	17/08/20	Madeira province	35559	0	0	18381	68490	975849	0.763115406	0.85642916	0.223352096	0.032377019	0	0	0.016736185	0.062361203	0.888525593
03/08/20	3023	GBIF	PRESERVED_SPECIMEN	NY	1929654439	SPECIES	Theobroma	guianense	0	Theobroma guianense (Aubl.) J.F.Gmel.	Redden, K.M.; et al.	5343	29/01/07	3.36622	-58.1886	1929654439	26/03/21	Guianan Lowlands province	12560	0	0	10263	27066	1125194	0.821456305	0.845209479	0.116625207	0.010688607	0	0	0.008733851	0.023033267	0.957544276
03/08/20	3712	GBIF	PRESERVED_SPECIMEN	RB	1852374172	SPECIES	Theobroma	guianense	0	Theobroma guianense (Aubl.) J.F.Gmel.	Castro, W.; et al.	1789	13/08/17	-9.636111	-61.644167	1852374172	26/03/21	Madeira province	1118	0	0	1769	13121	647290	0.84399394	0.864432573	0.079292308	0.001685517	0	0	0.002666976	0.019781456	0.975866051
03/08/20	3754	GBIF	PRESERVED_SPECIMEN	M	1848918010	SPECIES	Theobroma	sylvestre	Theobroma spruceanum	Theobroma sylvestre Mart.	Spruce, R.C.	166	/12/1849	-1.8963673	-55.5176144	1848918010	31/08/20	Madeira province	72416	0	0	16444	86914	1029710	0.733677931	0.838136613	0.250204515	0.060072137	0	0	0.013640994	0.072098842	0.854188027
03/08/20	3761	GBIF	PRESERVED_SPECIMEN	M	1848917951	SPECIES	Theobroma	mammosum	0	Theobroma mammosum Cuatrec. & J.LeÃ³n	LeÃ³n, J.	1363	30/01/49	10.09303	-83.43511	1848917951	02/11/20	Pacific dominion	229720	0	0	29320	87309	859186	0.598333731	0.801474214	0.394370574	0.190554401	0	0	0.024321152	0.072423447	0.712701
03/08/20	3331	GBIF	PRESERVED_SPECIMEN	NY	1927805773	SPECIES	Theobroma	guianense	0	Theobroma guianense (Aubl.) J.F.Gmel.	Aymard, G. & Delgado, L.	7867	16/02/90	-2.9666667	-65.35	1927805773	26/03/21	Imerí province	25135	0	0	5606	22785	1152070	0.809804092	0.848119259	0.162774702	0.020848609	0	0	0.004649982	0.018899366	0.955602042
03/08/20	3781	GBIF	PRESERVED_SPECIMEN	RB	1845613575	SPECIES	Theobroma	guianense	0	Theobroma guianense (Aubl.) J.F.Gmel.	Medeiros, H.; et al.	3262	27/11/17	1.203889	-52.391389	1845613575	26/03/21	Roraima province	54616	0	0	38762	100867	1011350	0.764858366	0.868604302	0.216908861	0.045302112	0	0	0.032151759	0.083665742	0.838880387
03/08/20	3785	GBIF	PRESERVED_SPECIMEN	COL	1844945350	SPECIES	Herrania	purpurea	0	Herrania purpurea (Pittier) R.E.Schult.	Forero, E.; et al.	1804	03/06/76	7.2996613	-77.1723023	1844945350	08/12/20	Pacific dominion	0	0	0	0	0	0	0	0	0	NA	NA	NA	NA	NA	NA
03/08/20	3787	GBIF	PRESERVED_SPECIMEN	COL	1844943586	SPECIES	Theobroma	obovatum	0	Theobroma obovatum Klotzsch ex Bernoulli	Simpson, D.R.	733	25/02/68	-3.8887	-73.6972	1322892452	25/09/20	Napo province	72433	0	0	27264	104842	1001049	0.705524528	0.806079984	0.23019889	0.060081056	0	0	0.022614691	0.086963374	0.830340879
03/08/20	3789	GBIF	PRESERVED_SPECIMEN	COL	1844941519	SPECIES	Herrania	nycterodendron	0	Herrania nycterodendron R.E.Schult.	Glenboski, L.L.	C-133	08/11/72	-3.6062361	-70.4147086	1844941519	07/04/21	Imerí province	16479	0	0	15266	51977	757664	0.76209136	0.818768144	0.15173687	0.019585541	0	0	0.018143872	0.061775451	0.900495135
03/08/20	3790	GBIF	PRESERVED_SPECIMEN	COL	1844939718	SPECIES	Theobroma	guianense	0	Theobroma guianense (Aubl.) J.F.Gmel.	Vigo, J.S.	3656	05/01/70	-7.2785279	-77.1697852	1424762772	17/03/21	South American Atlantic coast	27182	0	0	11273	79970	1087168	0.805681018	0.865106702	0.165026641	0.022546581	0	0	0.009350585	0.066332502	0.901770332
03/08/20	3791	GBIF	PRESERVED_SPECIMEN	COL	1844939691	SPECIES	Herrania	nitida	0	Herrania nitida (Poepp.) R.E.Schult.	Vigo, J.S.	3562	23/10/69	-7.4840286	-76.6506567	1319617868	07/04/21	Ucayali province	47500	0	0	12126	49497	744035	0.725921582	0.801128656	0.201961542	0.055675502	0	0	0.014213077	0.058016217	0.872095204
03/08/20	3792	GBIF	PRESERVED_SPECIMEN	COL	1844939212	VARIETY	Herrania	nitida	0	Herrania nitida (Poepp.) R.E.Schult.	Vigo, J.S.	2700	26/08/68	-9.3062055	-74.4383713	1322275026	07/04/21	Rondônia province	113625	0	0	29519	70290	966988	0.7223173	0.852541745	0.279468936	0.096257948	0	0	0.025007158	0.059546501	0.819188392
03/08/20	3793	GBIF	PRESERVED_SPECIMEN	COL	1844938786	SPECIES	Herrania	purpurea	0	Herrania purpurea (Pittier) R.E.Schult.	Gentry, A.H.	9235	15/01/74	8.1501	-76.6968	1844938786	08/12/20	Magdalena province	0	0	0	0	0	0	0	0	0	NA	NA	NA	NA	NA	NA
03/08/20	3795	GBIF	PRESERVED_SPECIMEN	COL	1844933755	SPECIES	Herrania	nitida	0	Herrania nitida (Poepp.) R.E.Schult.	Vigo, J.S.	3704	15/01/70	-8.4488985	-76.3246517	1322768056	07/04/21	Ucayali province	78379	0	0	19831	77146	670310	0.657115393	0.752648175	0.231335706	0.092683163	0	0	0.023450156	0.091225141	0.792641539
03/08/20	3797	GBIF	PRESERVED_SPECIMEN	COL	1844929606	SPECIES	Theobroma	chocoense	0	Theobroma chocoense Cuatrec.	Soejarto, D.D.	3393	20/10/72	7.3167	-75.056396	1844929606	08/03/21	Magdalena province	42189	0	0	40889	225674	317425	0.561893669	0.605162919	0.229354603	0.067375518	0	0	0.065299428	0.360399695	0.506925358
03/08/20	3801	GBIF	PRESERVED_SPECIMEN	COL	1844921942	SPECIES	Herrania	mariae	0	Herrania mariae (Mart.) Decne. ex Goudot	Cuatrecasas, J.	26664	08/11/62	-1.2407437	-48.459403	1317727001	07/04/21	Pará province	340265	0	0	27035	185859	652409	0.410442507	0.658553213	0.55760358	0.282244552	0	0	0.022425114	0.154167164	0.54116317
03/08/20	3803	GBIF	PRESERVED_SPECIMEN	COL	1844921377	SPECIES	Herrania	purpurea	0	Herrania purpurea (Pittier) R.E.Schult.	Soejarto, D.D.; et al.	3214	04/02/72	7.301538	-75.06905	931003319	07/04/21	Magdalena province	42189	0	0	40889	225674	317425	0.561893669	0.605162919	0.229354603	0.067375518	0	0	0.065299428	0.360399695	0.506925358
03/08/20	3806	GBIF	PRESERVED_SPECIMEN	COL	1844920794	SPECIES	Theobroma	obovatum	0	Theobroma obovatum Klotzsch ex Bernoulli	Prieto, A.; et al.	2001	07/02/04	-3.722222	-70.307222	1707578589	08/03/21	Imerí province	51884	0	0	20991	72181	650100	0.692628188	0.798938602	0.245448333	0.065250089	0	0	0.026398593	0.090775898	0.817575419
03/08/20	3807	GBIF	PRESERVED_SPECIMEN	COL	1844920581	SPECIES	Herrania	purpurea	0	Herrania purpurea (Pittier) R.E.Schult.	Soejarto, D.D.; et al.	3195	04/02/72	7.177463	-75.1218204	1844920581	07/04/21	Magdalena province	39809	0	0	14173	60307	742719	0.713804196	0.77106601	0.192969382	0.046451142	0	0	0.016537769	0.070369238	0.866641852
03/08/20	3808	GBIF	PRESERVED_SPECIMEN	COL	1844920225	SPECIES	Herrania	cuatrecasana	0	Herrania cuatrecasana GarcÃ­a-Barr.	Garcia-Barriga, H.	18808	18/06/67	3.47852	-76.18963	1844920225	16/12/20	Cauca province	51470	0	0	30115	116930	492551	0.633416899	0.712782443	0.22465369	0.074479138	0	0	0.043577603	0.169202363	0.712740896
03/08/20	3809	GBIF	PRESERVED_SPECIMEN	COL	1844918590	SPECIES	Herrania	nitida	0	Herrania nitida (Poepp.) R.E.Schult.	Thomas, J.; et al.	1586	25/01/68	2.147515727	-74.06840943	1844918572	16/12/20	Imerí province	7424	0	0	4906	98025	1062972	0.763648751	0.808135986	0.117926711	0.006327307	0	0	0.004181273	0.083544485	0.905946936
03/08/20	3813	GBIF	PRESERVED_SPECIMEN	COL	1844915565	SPECIES	Herrania	dugandii	0	Herrania dugandii GarcÃ­a-Barr.	s.c.	242	//	0	0	0	07/04/21	0	0	0	0	0	0	0	0	0	0	NA	NA	NA	NA	NA	NA
03/08/20	3817	GBIF	PRESERVED_SPECIMEN	COL	1844909745	SPECIES	Theobroma	guianense	0	Theobroma guianense (Aubl.) J.F.Gmel.	Rudas, A.; et al.	3780	26/03/92	-3.7	-70.25	1844909745	08/03/21	Imerí province	51884	0	0	20991	72181	650100	0.692628188	0.798938602	0.245448333	0.065250089	0	0	0.026398593	0.090775898	0.817575419
03/08/20	3827	GBIF	PRESERVED_SPECIMEN	COL	1844907451	SPECIES	Herrania	purpurea	0	Herrania purpurea (Pittier) R.E.Schult.	0	1965	//	6.1535326	-75.4268797	0	08/12/20	Cauca province	15458	0	0	10309	124422	948954	0.730005157	0.774602294	0.14826789	0.014063684	0	0	0.009379125	0.113199101	0.863358089
03/08/20	3830	GBIF	PRESERVED_SPECIMEN	COL	1844905511	SPECIES	Theobroma	chocoense	0	Theobroma chocoense Cuatrec.	Cuatrecasas, J. & Willard, L.	26074	25/09/61	3.9983	-76.9755	1844905511	21/10/20	Pacific dominion	0	0	0	0	0	0	0	0	0	NA	NA	NA	NA	NA	NA
03/08/20	3836	GBIF	PRESERVED_SPECIMEN	COL	1844904780	SPECIES	Theobroma	stipulatum	0	Theobroma stipulatum Cuatrec.	Romero-CastaÃ±eda, R.	4664	01/07/54	5.96746	-76.350505	1844904780	20/10/20	Cauca province	0	0	0	0	0	0	0	0	0	NA	NA	NA	NA	NA	NA
03/08/20	3838	GBIF	PRESERVED_SPECIMEN	COL	1844904750	SPECIES	Herrania	laciniifolia	0	Herrania laciniifolia Goudot ex Triana & Planch.	Romero-CastaÃ±eda, R.	10259	//	5.1992	-74.896896	0	10/11/20	Magdalena province	82000	0	0	67864	372422	683258	0.580985662	0.638953388	0.218157803	0.068019085	0	0	0.056293258	0.308924436	0.566763221
03/08/20	3861	GBIF	PRESERVED_SPECIMEN	RB	1844892739	SPECIES	Theobroma	guianense	0	Theobroma guianense (Aubl.) J.F.Gmel.	Medeiros, H.; et al.	2214	15/09/17	-1.901111	-61.683889	1844892739	20/11/20	Imerí province	89311	0	0	5944	21290	1087950	0.763905478	0.845467031	0.245657669	0.074148087	0	0	0.004934848	0.017675457	0.903241607
03/08/20	3870	GBIF	PRESERVED_SPECIMEN	CNMT	1840925517	SPECIES	Theobroma	guianense	0	Theobroma guianense (Aubl.) J.F.Gmel.	Cordova, M.O. & Sabino, M.D.S.	158	11/10/15	-9.462639	-55.81605	0	17/03/21	Xingu-Tapajós province	29928	0	0	24661	156771	994240	0.74467739	0.832996607	0.195749733	0.024824154	0	0	0.020455375	0.130035667	0.824684804
03/08/20	2714	GBIF	PRESERVED_SPECIMEN	COAH	1932880390	SPECIES	Theobroma	guianense	0	Theobroma guianense (Aubl.) J.F.Gmel.	Navarro, J. & Kuiru, E.	2076	12/02/10	1.07	-76.63	1934694653	28/12/20	Napo province	0	0	0	0	0	0	0	0	0	NA	NA	NA	NA	NA	NA
03/08/20	929	GBIF	PRESERVED_SPECIMEN	U	2515416584	SPECIES	Theobroma	velutinum	0	Theobroma velutinum Benoist	Oldeman, R.A.A.	1937	21/01/66	3.928553	-51.813108	2515416584	07/08/20	Guianan Lowlands province	0	0	0	0	0	0	0	0	0	NA	NA	NA	NA	NA	NA
03/08/20	3976	GBIF	PRESERVED_SPECIMEN	EAFM	1837387404	SPECIES	Theobroma	guianense	0	Theobroma guianense (Aubl.) J.F.Gmel.	Marra, D.M.; et al.	1349	21/09/12	-3.673356	-61.250489	0	17/03/21	Madeira province	101888	0	0	41944	121642	939894	0.686708681	0.822955728	0.279330545	0.084528542	0	0	0.034797672	0.100916898	0.779756888
03/08/20	3977	GBIF	PRESERVED_SPECIMEN	EAFM	1837387237	SPECIES	Theobroma	sylvestre	0	Theobroma sylvestre Mart.	Marra, D.M.; et al.	1178	04/09/12	-3.650631	-61.251219	0	31/08/20	Imerí province	101888	0	0	41944	121642	939894	0.686708681	0.822955728	0.279330545	0.084528542	0	0	0.034797672	0.100916898	0.779756888
03/08/20	3978	GBIF	PRESERVED_SPECIMEN	EAFM	1837386156	SPECIES	Theobroma	guianense	0	Theobroma guianense (Aubl.) J.F.Gmel.	Marra, D.M.; et al.	109	05/04/11	-2.404011	-60.31035	0	17/03/21	Roraima province	106694	0	0	26484	78665	992656	0.707459034	0.81961298	0.238049976	0.088579567	0	0	0.021987565	0.065309311	0.824123557
03/08/20	3979	GBIF	PRESERVED_SPECIMEN	EAFM	1837385138	SPECIES	Theobroma	guianense	0	Theobroma guianense (Aubl.) J.F.Gmel.	Castilho, C.V.; et al.	514	10/01/02	-2.927591	-59.910159	1042681325	17/03/21	Roraima province	139821	0	0	14251	68494	857415	0.646253137	0.841756701	0.410128487	0.129466167	0	0	0.013195603	0.063421486	0.793916745
03/08/20	12524	GBIF	PRESERVED_SPECIMEN	F	1228461396	SPECIES	Herrania	nitida	Theobroma aspera	Herrania nitida (Poepp.) R.E.Schult.	Karsten, H.	s.n.	//	3.8811	-72.8667	0	01/06/21	Pacific dominion	22458	0	0	39644	598942	544545	0.577898964	0.577643156	0.170524054	0.018628239	0	0	0.032883512	0.496804467	0.451683783
03/08/20	4016	GBIF	PRESERVED_SPECIMEN	RB	1827467425	SPECIES	Theobroma	guianense	0	Theobroma guianense (Aubl.) J.F.Gmel.	Forzza, R.C.; et al.	9539	27/11/17	1.188333	-52.381667	1827467425	26/03/21	Roraima province	54616	0	0	38762	100867	1011350	0.764858366	0.868604302	0.216908861	0.045302112	0	0	0.032151759	0.083665742	0.838880387
03/08/20	4017	GBIF	PRESERVED_SPECIMEN	RB	1827466971	SPECIES	Theobroma	guianense	0	Theobroma guianense (Aubl.) J.F.Gmel.	Forzza, R.C.; et al.	9282	23/10/17	-9.514498	-58.6790952	1827466971	26/03/21	Madeira province	19906	0	0	5698	56957	1123033	0.794890357	0.850499511	0.167120729	0.016511363	0	0	0.004726301	0.047243931	0.931518405
03/08/20	4028	GBIF	PRESERVED_SPECIMEN	RB	1819184869	SPECIES	Theobroma	guianense	0	Theobroma guianense (Aubl.) J.F.Gmel.	Soares, C.R.A.; et al.	2269	29/05/09	-9.229167	-56.9925	1819184869	20/11/20	Madeira province	26948	0	0	11757	92463	636523	0.741479985	0.838691771	0.226029984	0.035102665	0	0	0.015314756	0.120442991	0.829139589
03/08/20	4029	GBIF	PRESERVED_SPECIMEN	RB	1819183766	SPECIES	Theobroma	obovatum	0	Theobroma obovatum Klotzsch ex Bernoulli	Plowman, T.C.; et al.	s.n.	10/12/82	-3.316667	-64.816667	1927838481	08/04/21	Imerí province	63999	0	0	3569	18289	543836	0.721028656	0.874201775	0.376837686	0.101635241	0	0	0.005667841	0.029044312	0.863652605
03/08/20	4035	GBIF	PRESERVED_SPECIMEN	MPU	1807432428	SPECIES	Theobroma	guianense	0	Theobroma guianense (Aubl.) J.F.Gmel.	Postale, B.	165	17/07/92	5.0166667	-53.0166667	1807432428	26/03/21	Guianan Lowlands province	0	0	0	0	0	0	0	0	0	NA	NA	NA	NA	NA	NA
03/08/20	4040	GBIF	PRESERVED_SPECIMEN	MPU	1807432265	SPECIES	Theobroma	guianense	0	Theobroma guianense (Aubl.) J.F.Gmel.	Denis, L.	1821	17/07/92	5.0167	-53.0167	1807432265	26/03/21	Guianan Lowlands province	0	0	0	0	0	0	0	0	0	NA	NA	NA	NA	NA	NA
03/08/20	4050	GBIF	PRESERVED_SPECIMEN	HERBAM	1801348835	SPECIES	Theobroma	speciosum	0	Theobroma speciosum Willd. ex Spreng.	Spletozer, A.G.; et al.	73	12/07/14	-9.895889	-55.999667	0	18/08/20	Madeira province	9555	0	0	6085	45252	663961	0.789473016	0.859275043	0.169999362	0.013181983	0	0	0.008394806	0.06242921	0.915994002
03/08/20	4051	GBIF	PRESERVED_SPECIMEN	HERBAM	1801348809	SPECIES	Theobroma	guianense	0	Theobroma guianense (Aubl.) J.F.Gmel.	Spletozer, A.G.; et al.	39	13/12/13	-9.885944	-55.99775	0	17/03/21	Madeira province	29928	0	0	24661	156771	994240	0.74467739	0.832996607	0.195749733	0.024824154	0	0	0.020455375	0.130035667	0.824684804
03/08/20	4052	GBIF	PRESERVED_SPECIMEN	HERBAM	1801348781	SPECIES	Theobroma	guianense	0	Theobroma guianense (Aubl.) J.F.Gmel.	Spletozer, A.G.; et al.	40	16/12/13	-9.94825	-56.058972	0	17/03/21	Madeira province	9555	0	0	6085	45252	663961	0.789473016	0.859275043	0.169999362	0.013181983	0	0	0.008394806	0.06242921	0.915994002
03/08/20	4061	GBIF	PRESERVED_SPECIMEN	FMB	1707598558	SPECIES	Theobroma	obovatum	0	Theobroma obovatum Klotzsch ex Bernoulli	Mendoza, H. & Siona, C.	17255	14/02/08	-0.07775	-74.98875	1707598558	05/03/21	Napo province	10309	0	0	3169	12874	569107	0.792309495	0.829445481	0.15613141	0.017312695	0	0	0.005321945	0.021620296	0.955745064
03/08/20	4062	GBIF	PRESERVED_SPECIMEN	FMB	1707597486	SPECIES	Theobroma	guianense	0	Theobroma guianense (Aubl.) J.F.Gmel.	Cordoba, M.; et al.	386	21/02/95	2.86	-69.09	1707597486	17/03/21	Imerí province	10753	0	0	1031	6151	1187665	0.816345063	0.832224667	0.111382855	0.00891921	0	0	0.000855176	0.005102024	0.98512359
03/08/20	4063	GBIF	PRESERVED_SPECIMEN	FMB	1707596401	SPECIES	Theobroma	guianense	0	Theobroma guianense (Aubl.) J.F.Gmel.	Prado, L.; et al.	898	15/04/00	0.5175	-72.641028	1707596401	05/03/21	Imerí province	2240	0	0	517	34935	1167911	0.821380843	0.843448281	0.084969133	0.001857991	0	0	0.000428831	0.028977201	0.968735977
03/08/20	4064	GBIF	PRESERVED_SPECIMEN	FMB	1707596264	SPECIES	Theobroma	obovatum	0	Theobroma obovatum Klotzsch ex Bernoulli	Prado, L.; et al.	892	15/04/00	0.5175	-72.641028	1707596264	05/03/21	Imerí province	2240	0	0	517	34935	1167911	0.821380843	0.843448281	0.084969133	0.001857991	0	0	0.000428831	0.028977201	0.968735977
03/08/20	4065	GBIF	PRESERVED_SPECIMEN	FMB	1707591699	SPECIES	Theobroma	obovatum	0	Theobroma obovatum Klotzsch ex Bernoulli	Robles, A.; et al.	299	05/12/07	-4.005	-69.9125	1707591699	05/03/21	Imerí province	60898	0	0	29641	105817	608931	0.689182291	0.8391155	0.292874337	0.075622728	0	0	0.036807995	0.131402841	0.756166435
03/08/20	4066	GBIF	PRESERVED_SPECIMEN	FMB	1707591383	SPECIES	Theobroma	guianense	0	Theobroma guianense (Aubl.) J.F.Gmel.	Robles, A.; et al.	389	05/12/07	-4.005	-69.9125	1707591383	05/03/21	Imerí province	60898	0	0	29641	105817	608931	0.689182291	0.8391155	0.292874337	0.075622728	0	0	0.036807995	0.131402841	0.756166435
03/08/20	4067	GBIF	PRESERVED_SPECIMEN	FMB	1707589224	SPECIES	Theobroma	guianense	0	Theobroma guianense (Aubl.) J.F.Gmel.	Mendoza, H.; et al.	12498	15/02/01	0.211667	-72.4175	1707589224	17/03/21	Imerí province	2240	0	0	517	34935	1167911	0.821380843	0.843448281	0.084969133	0.001857991	0	0	0.000428831	0.028977201	0.968735977
03/08/20	4068	GBIF	PRESERVED_SPECIMEN	FMB	1707589164	SPECIES	Theobroma	guianense	0	Theobroma guianense (Aubl.) J.F.Gmel.	Mendoza, H.; et al.	11673	15/11/00	0.534444	-72.6325	1707589164	17/03/21	Imerí province	2240	0	0	517	34935	1167911	0.821380843	0.843448281	0.084969133	0.001857991	0	0	0.000428831	0.028977201	0.968735977
03/08/20	4069	GBIF	PRESERVED_SPECIMEN	FMB	1707589071	SPECIES	Theobroma	obovatum	0	Theobroma obovatum Klotzsch ex Bernoulli	Mendoza, H.; et al.	10954	15/11/00	0.5175	-72.641111	1707589071	05/03/21	Imerí province	2240	0	0	517	34935	1167911	0.821380843	0.843448281	0.084969133	0.001857991	0	0	0.000428831	0.028977201	0.968735977
03/08/20	4071	GBIF	PRESERVED_SPECIMEN	FMB	1707582669	SPECIES	Theobroma	obovatum	0	Theobroma obovatum Klotzsch ex Bernoulli	Mendoza, H.; et al.	11257	15/04/00	0.167222	-72.609722	1707582669	05/03/21	Imerí province	2240	0	0	517	34935	1167911	0.821380843	0.843448281	0.084969133	0.001857991	0	0	0.000428831	0.028977201	0.968735977
03/08/20	4072	GBIF	PRESERVED_SPECIMEN	FMB	1707582444	SPECIES	Theobroma	simiarum	0	Theobroma simiarum Donn.Sm.	Mendoza, H.; et al.	13831	20/01/00	0.260556	-72.923333	1707582444	05/03/21	Imerí province	2240	0	0	517	34935	1167911	0.821380843	0.843448281	0.084969133	0.001857991	0	0	0.000428831	0.028977201	0.968735977
03/08/20	4073	GBIF	PRESERVED_SPECIMEN	FMB	1707581469	SPECIES	Theobroma	guianense	0	Theobroma guianense (Aubl.) J.F.Gmel.	Mendoza, H.; et al.	13413	20/01/00	0.260556	-72.923333	1707581469	17/03/21	Imerí province	2240	0	0	517	34935	1167911	0.821380843	0.843448281	0.084969133	0.001857991	0	0	0.000428831	0.028977201	0.968735977
03/08/20	4074	GBIF	PRESERVED_SPECIMEN	FMB	1707581448	SPECIES	Theobroma	obovatum	0	Theobroma obovatum Klotzsch ex Bernoulli	Prado, F.; et al.	959	01/04/00	0.179722	-72.623333	1707581448	05/03/21	Imerí province	2240	0	0	517	34935	1167911	0.821380843	0.843448281	0.084969133	0.001857991	0	0	0.000428831	0.028977201	0.968735977
03/08/20	4075	GBIF	PRESERVED_SPECIMEN	FMB	1707580724	SPECIES	Theobroma	guianense	0	Theobroma guianense (Aubl.) J.F.Gmel.	Mendoza, H.; et al.	14052	20/01/00	0.242222	-72.9375	1707580724	17/03/21	Imerí province	2240	0	0	517	34935	1167911	0.821380843	0.843448281	0.084969133	0.001857991	0	0	0.000428831	0.028977201	0.968735977
03/08/20	4079	GBIF	PRESERVED_SPECIMEN	FMB	1707580002	SPECIES	Theobroma	obovatum	0	Theobroma obovatum Klotzsch ex Bernoulli	Prieto, A.; et al.	3400	09/02/05	3.719444	-70.307222	1707580002	25/09/20	Imerí province	36437	0	0	45915	340070	783181	0.679975018	0.825653791	0.228383782	0.03022305	0	0	0.038084676	0.282074613	0.64961766
03/08/20	4082	GBIF	PRESERVED_SPECIMEN	FMB	1707579449	SPECIES	Theobroma	guianense	0	Theobroma guianense (Aubl.) J.F.Gmel.	Prieto, A.; et al.	2064	07/02/04	-3.722222	-70.307222	1707579449	17/03/21	Imerí province	51884	0	0	20991	72181	650100	0.692628188	0.798938602	0.245448333	0.065250089	0	0	0.026398593	0.090775898	0.817575419
03/08/20	4085	GBIF	PRESERVED_SPECIMEN	FMB	1707579227	SPECIES	Theobroma	obovatum	0	Theobroma obovatum Klotzsch ex Bernoulli	Prieto, A.; et al.	2146	14/02/04	-3.719444	-70.307222	1707579227	25/09/20	Imerí province	51884	0	0	20991	72181	650100	0.692628188	0.798938602	0.245448333	0.065250089	0	0	0.026398593	0.090775898	0.817575419
03/08/20	4087	GBIF	PRESERVED_SPECIMEN	FMB	1707578996	SPECIES	Theobroma	guianense	0	Theobroma guianense (Aubl.) J.F.Gmel.	Prieto, A.; et al.	2974	09/02/05	-3.719444	-70.307222	1707578996	17/03/21	Imerí province	51884	0	0	20991	72181	650100	0.692628188	0.798938602	0.245448333	0.065250089	0	0	0.026398593	0.090775898	0.817575419
03/08/20	4088	GBIF	PRESERVED_SPECIMEN	FMB	1707578943	SPECIES	Theobroma	obovatum	0	Theobroma obovatum Klotzsch ex Bernoulli	Prieto, A.; et al.	2899	01/02/03	-3.055556	-69.990556	1707578943	25/09/20	Imerí province	4364	0	0	402	1246	546949	0.830305596	0.842488408	0.112975706	0.007892057	0	0	0.000726995	0.002253323	0.989127624
03/08/20	4090	GBIF	PRESERVED_SPECIMEN	FMB	1707578806	SPECIES	Theobroma	microcarpum	0	Theobroma microcarpum Mart.	Prieto, A.; et al.	3218	09/02/05	-3.719444	-70.307222	1707578806	16/09/20	Imerí province	51884	0	0	20991	72181	650100	0.692628188	0.798938602	0.245448333	0.065250089	0	0	0.026398593	0.090775898	0.817575419
03/08/20	4092	GBIF	PRESERVED_SPECIMEN	FMB	1707570615	SPECIES	Theobroma	obovatum	0	Theobroma obovatum Klotzsch ex Bernoulli	Mendoza, H.; et al.	11953	15/11/00	0.5	-72.630556	1707570615	30/09/20	Imerí province	2240	0	0	517	34935	1167911	0.821380843	0.843448281	0.084969133	0.001857991	0	0	0.000428831	0.028977201	0.968735977
03/08/20	4093	GBIF	PRESERVED_SPECIMEN	FMB	1707570429	SPECIES	Theobroma	guianense	0	Theobroma guianense (Aubl.) J.F.Gmel.	Mendoza, H.; et al.	11672	15/11/00	0.534444	-72.632778	1707570429	17/03/21	Imerí province	2240	0	0	517	34935	1167911	0.821380843	0.843448281	0.084969133	0.001857991	0	0	0.000428831	0.028977201	0.968735977
03/08/20	4095	GBIF	PRESERVED_SPECIMEN	FMB	1707570314	SPECIES	Theobroma	guianense	0	Theobroma guianense (Aubl.) J.F.Gmel.	Mendoza, H.; et al.	10776	15/11/00	0.5175	-72.641111	1707570314	05/03/21	Imerí province	2240	0	0	517	34935	1167911	0.821380843	0.843448281	0.084969133	0.001857991	0	0	0.000428831	0.028977201	0.968735977
03/08/20	4096	GBIF	PRESERVED_SPECIMEN	FMB	1707570280	SPECIES	Theobroma	guianense	0	Theobroma guianense (Aubl.) J.F.Gmel.	Mendoza, H.; et al.	11256	15/04/01	0.167222	-72.609722	1707570280	17/03/21	Imerí province	2240	0	0	517	34935	1167911	0.821380843	0.843448281	0.084969133	0.001857991	0	0	0.000428831	0.028977201	0.968735977
03/08/20	4097	GBIF	PRESERVED_SPECIMEN	FMB	1707570258	SPECIES	Theobroma	guianense	0	Theobroma guianense (Aubl.) J.F.Gmel.	Mendoza, H.; et al.	12760	15/02/01	0.213333	-72.423611	1707570258	17/03/21	Imerí province	2240	0	0	517	34935	1167911	0.821380843	0.843448281	0.084969133	0.001857991	0	0	0.000428831	0.028977201	0.968735977
03/08/20	4099	GBIF	PRESERVED_SPECIMEN	FMB	1707570073	SPECIES	Theobroma	guianense	0	Theobroma guianense (Aubl.) J.F.Gmel.	Mendoza, H.; et al.	11933	15/11/00	0.5	-72.630556	1707570073	17/03/21	Imerí province	2240	0	0	517	34935	1167911	0.821380843	0.843448281	0.084969133	0.001857991	0	0	0.000428831	0.028977201	0.968735977
03/08/20	4100	GBIF	PRESERVED_SPECIMEN	FMB	1707568939	SPECIES	Theobroma	guianense	0	Theobroma guianense (Aubl.) J.F.Gmel.	Mendoza, H.; et al.	13151	15/02/01	0.209444	-72.415278	1707568939	17/03/21	Imerí province	2240	0	0	517	34935	1167911	0.821380843	0.843448281	0.084969133	0.001857991	0	0	0.000428831	0.028977201	0.968735977
03/08/20	4101	GBIF	PRESERVED_SPECIMEN	FMB	1707568924	SPECIES	Theobroma	guianense	0	Theobroma guianense (Aubl.) J.F.Gmel.	Mendoza, H.; et al.	10775	15/04/01	0.179722	-72.623333	1707568924	17/03/21	Imerí province	2240	0	0	517	34935	1167911	0.821380843	0.843448281	0.084969133	0.001857991	0	0	0.000428831	0.028977201	0.968735977
03/08/20	4103	GBIF	PRESERVED_SPECIMEN	FMB	1707566272	SPECIES	Theobroma	guianense	0	Theobroma guianense (Aubl.) J.F.Gmel.	Rudas, A.; et al.	2452	24/06/91	-3.033333	-70	1707566272	17/03/21	Imerí province	4364	0	0	402	1246	546949	0.830305596	0.842488408	0.112975706	0.007892057	0	0	0.000726995	0.002253323	0.989127624
03/08/20	5044	GBIF	PRESERVED_SPECIMEN	COAH	1416799312	SPECIES	Theobroma	guianense	0	Theobroma guianense (Aubl.) J.F.Gmel.	Davila, D.; et al.	301	18/11/00	0.07	-72.45	1416799312	28/12/20	Imerí province	2240	0	0	517	34935	1167911	0.821380843	0.843448281	0.084969133	0.001857991	0	0	0.000428831	0.028977201	0.968735977
03/08/20	4108	GBIF	PRESERVED_SPECIMEN	FMB	1707555527	SPECIES	Herrania	nycterodendron	0	Herrania nycterodendron R.E.Schult.	Barbosa, C.E.	5290	28/08/88	2.083333	-74	1707555527	07/06/21	Imerí province	5978	0	0	3230	21530	194813	0.750040834	0.830303013	0.172955201	0.026503984	0	0	0.014320486	0.09545513	0.8637204
03/08/20	4109	GBIF	PRESERVED_SPECIMEN	FMB	1707553412	SPECIES	Herrania	umbratica	0	Herrania umbratica R.E.Schult.	Zuluaga, S.	527	12/01/83	0	0	1707553412	09/11/20	0	0	0	0	0	0	0	0	0	0	NA	NA	NA	NA	NA	NA
03/08/20	4110	GBIF	PRESERVED_SPECIMEN	FMB	1707553189	SPECIES	Theobroma	guianense	0	Theobroma guianense (Aubl.) J.F.Gmel.	Mendoza, H.	1103	24/02/96	2.3540574	-71.9138491	1707553189	05/03/21	Imerí province	1651	0	0	855	33202	1072389	0.804116551	0.82057333	0.07596584	0.001489942	0	0	0.000771593	0.029963081	0.967775384
03/08/20	4111	GBIF	PRESERVED_SPECIMEN	FMB	1707553082	SPECIES	Theobroma	simiarum	0	Theobroma simiarum Donn.Sm.	Gentry, A.H.; et al.	75901	29/02/92	6.583333	-76.833333	1707553082	05/03/21	Pacific dominion	0	0	0	0	0	0	0	0	0	NA	NA	NA	NA	NA	NA
03/08/20	4112	GBIF	PRESERVED_SPECIMEN	FMB	1707553064	SPECIES	Theobroma	obovatum	0	Theobroma obovatum Klotzsch ex Bernoulli	Rudas, A.; et al.	3934	28/03/92	-3.7	-70.25	1123882565	05/03/21	Imerí province	51884	0	0	20991	72181	650100	0.692628188	0.798938602	0.245448333	0.065250089	0	0	0.026398593	0.090775898	0.817575419
03/08/20	2860	GBIF	PRESERVED_SPECIMEN	NY	1930579234	SPECIES	Theobroma	guianense	0	Theobroma guianense (Aubl.) J.F.Gmel.	Simon, M.F.; et al.	1023	18/10/10	-9.256944	-64.664722	1930579234	24/03/21	Madeira province	24587	0	0	6138	73033	989942	0.777572666	0.865239799	0.208227848	0.022480571	0	0	0.005612142	0.066776081	0.905131206
03/08/20	4120	GBIF	PRESERVED_SPECIMEN	FMB	1707552494	SPECIES	Theobroma	microcarpum	0	Theobroma microcarpum Mart.	Rudas, A.; et al.	5360	13/07/92	-3.033333	-70	1707552494	05/03/21	Imerí province	4364	0	0	402	1246	546949	0.830305596	0.842488408	0.112975706	0.007892057	0	0	0.000726995	0.002253323	0.989127624
03/08/20	2592	GBIF	PRESERVED_SPECIMEN	COL	1934712224	SPECIES	Herrania	albiflora	0	Herrania albiflora Goudot	Pardo, C.I.O.	3213	26/03/00	5.9400386	-74.4813713	1934712224	07/04/21	Magdalena province	31946	0	0	13044	275986	884611	0.685555121	0.736332417	0.187832974	0.026498295	0	0	0.010819626	0.228922508	0.733759571
03/08/20	2266	GBIF	PRESERVED_SPECIMEN	FMB	2005618949	SPECIES	Herrania	albiflora	0	Herrania albiflora Goudot	Mendoza, H.; et al.	21321	10/07/18	6.445056	-74.117194	2005618949	06/11/20	Magdalena province	81176	0	0	55410	328746	740243	0.614404386	0.664611578	0.224985237	0.067333845	0	0	0.045961471	0.272688136	0.614016548
03/08/20	4127	GBIF	PRESERVED_SPECIMEN	FMB	1707550269	SPECIES	Theobroma	nemorale	0	Theobroma cirmolinae Cuatrec.	Cogollo-Pacheco, A.; et al.	3456	24/07/88	6.566667	-76.316667	1707550269	30/10/20	Cauca province	0	0	0	0	0	0	0	0	0	NA	NA	NA	NA	NA	NA
03/08/20	4130	GBIF	PRESERVED_SPECIMEN	FMB	1707548427	SPECIES	Theobroma	obovatum	0	Theobroma obovatum Klotzsch ex Bernoulli	Rudas, A.; et al.	5861	23/07/92	-3.033333	-70	1707548427	25/09/20	Imerí province	4364	0	0	402	1246	546949	0.830305596	0.842488408	0.112975706	0.007892057	0	0	0.000726995	0.002253323	0.989127624
03/08/20	4141	GBIF	PRESERVED_SPECIMEN	FMB	1707546804	SPECIES	Theobroma	chocoense	0	Theobroma chocoense Cuatrec.	Gentry, A.H.; et al.	75861	29/02/92	6.583333	-76.833333	1707546804	05/03/21	Pacific dominion	0	0	0	0	0	0	0	0	0	NA	NA	NA	NA	NA	NA
03/08/20	4145	GBIF	PRESERVED_SPECIMEN	FMB	1707539964	SPECIES	Herrania	umbratica	0	Herrania umbratica R.E.Schult.	Warner, P.	487	09/12/74	9.5117587	-75.3623271	1707539964	07/06/21	Magdalena province	238065	0	0	41983	417872	507316	0.443032984	0.547268271	0.372302785	0.19752563	0	0	0.034833842	0.346713839	0.42092669
03/08/20	3386	GBIF	PRESERVED_SPECIMEN	COL	1898873800	SPECIES	Theobroma	glaucum	0	Theobroma glaucum H.Karst.	Rotta, C.L.	676	03/06/85	0	0	0	04/09/20	0	0	0	0	0	0	0	0	0	0	NA	NA	NA	NA	NA	NA
03/08/20	13944	GBIF	PRESERVED_SPECIMEN	FMB	1060487925	SPECIES	Herrania	purpurea	0	Herrania purpurea (Pittier) R.E.Schult.	Warner, P.	310	07/03/74	9.58391	-75.4551	1707538375	11/02/22	Pacific dominion	238065	0	0	41983	417872	507316	0.443032984	0.547268271	0.372302785	0.19752563	0	0	0.034833842	0.346713839	0.42092669
03/08/20	4149	GBIF	PRESERVED_SPECIMEN	FMB	1707537355	SPECIES	Herrania	nitida	0	Herrania nitida (Poepp.) R.E.Schult.	Ohba, A.; et al.	615	//1992	2.1475157	-74.0684094	1707537355	07/06/21	Imerí province	7424	0	0	4906	98025	1062972	0.763648751	0.808135986	0.117926711	0.006327307	0	0	0.004181273	0.083544485	0.905946936
03/08/20	4152	GBIF	PRESERVED_SPECIMEN	FMB	1707533082	SPECIES	Herrania	albiflora	0	Herrania albiflora Goudot	Hoba], A.; et al.	1140	01/01/85	2.1475157	-74.0684094	1707533082	07/06/21	Imerí province	7424	0	0	4906	98025	1062972	0.763648751	0.808135986	0.117926711	0.006327307	0	0	0.004181273	0.083544485	0.905946936
03/08/20	4153	GBIF	PRESERVED_SPECIMEN	FMB	1707532940	SPECIES	Theobroma	nemorale	0	Theobroma nemorale Cuatrec.	Barbosa, C.E.	6621	17/05/90	6.083333	-77.166667	1707532940	05/03/21	Pacific dominion	0	0	0	0	0	0	0	0	0	NA	NA	NA	NA	NA	NA
03/08/20	4154	GBIF	PRESERVED_SPECIMEN	FMB	1707532479	SPECIES	Theobroma	guianense	0	Theobroma guianense (Aubl.) J.F.Gmel.	Nishimura, A.	s.n.	//1990	2.1475157	-74.0684094	1707532479	05/03/21	Imerí province	7424	0	0	4906	98025	1062972	0.763648751	0.808135986	0.117926711	0.006327307	0	0	0.004181273	0.083544485	0.905946936
03/08/20	4156	GBIF	PRESERVED_SPECIMEN	FMB	1707526779	SPECIES	Herrania	purpurea	0	Herrania purpurea (Pittier) R.E.Schult.	Barbosa, C.	14209	06/07/94	7.440556	-77.118889	1707526779	07/06/21	Pacific dominion	0	0	0	0	0	0	0	0	0	NA	NA	NA	NA	NA	NA
03/08/20	2732	GBIF	PRESERVED_SPECIMEN	COAH	1932875739	SPECIES	Theobroma	glaucum	0	Theobroma glaucum H.Karst.	Rodriguez, N.	747	03/05/97	0.7	-76.77	1932875739	04/09/20	Napo province	53445	0	0	20014	69430	1062692	0.748130095	0.827962875	0.199050166	0.044331322	0	0	0.016601124	0.05759049	0.881477064
03/08/20	11346	GBIF	PRESERVED_SPECIMEN	MO	1259170568	SPECIES	Theobroma	glaucum	0	Theobroma glaucum H.Karst.	Pipoly, J.J.; et al.	14243	03/03/91	-3.3333333	-72.91666	1259170568	04/12/20	Imerí province	67693	0	0	32925	93198	548023	0.683749921	0.845768034	0.296659663	0.091250258	0	0	0.044382946	0.125631033	0.738735763
03/08/20	5119	GBIF	PRESERVED_SPECIMEN	US	1322802824	SUBSPECIES	Theobroma	glaucum	0	Theobroma glaucum H.Karst.	McPherson, G.D.	8547	04/03/86	8.8333333	-82.25	1317642396	11/09/20	Puntarenas-Chiriquí province	0	0	0	0	0	0	0	0	0	NA	NA	NA	NA	NA	NA
03/08/20	4175	GBIF	PRESERVED_SPECIMEN	FMB	1707523359	SPECIES	Theobroma	obovatum	0	Theobroma obovatum Klotzsch ex Bernoulli	Rudas, A.; et al.	4226	30/03/92	-3.6675118	-70.0281176	1707523359	25/09/20	Imerí province	20325	0	0	16505	49152	465983	0.722227264	0.807436943	0.196958992	0.036822987	0	0	0.029902258	0.089049124	0.84422563
03/08/20	4184	GBIF	PRESERVED_SPECIMEN	FMB	1707517746	SPECIES	Theobroma	guianense	0	Theobroma guianense (Aubl.) J.F.Gmel.	Mendoza, H.; et al.	6671A	07/09/98	0.501944	-77.230278	1707517746	05/03/21	Paramo province	0	0	0	0	0	0	0	0	0	NA	NA	NA	NA	NA	NA
03/08/20	4185	GBIF	PRESERVED_SPECIMEN	FMB	1707517705	SPECIES	Herrania	cuatrecasana	0	Herrania cuatrecasana GarcÃ­a-Barr.	Mendoza, H.; et al.	6742	07/09/98	0.501944	-77.230278	1707517705	07/06/21	Paramo province	0	0	0	0	0	0	0	0	0	NA	NA	NA	NA	NA	NA
03/08/20	1860	GBIF	PRESERVED_SPECIMEN	US	2284140520	SPECIES	Theobroma	glaucum	0	Theobroma glaucum H.Karst.	Plowman, T.C.; et al.	12129	03/12/82	-2.4667	-65.05	2516417796	09/04/21	Imerí province	14083	0	0	1047	2501	364623	0.803479693	0.850121379	0.200329467	0.036841995	0	0	0.002739016	0.00654277	0.953876218
03/08/20	2746	GBIF	PRESERVED_SPECIMEN	NY	1931374229	SPECIES	Theobroma	speciosum	0	Theobroma speciosum Willd. ex Spreng.	Pereira-Silva, G.; et al.	15419	20/06/10	-9.4930556	-64.8161111	1095252549	12/04/21	Madeira province	35559	0	0	18381	68490	975849	0.763115406	0.85642916	0.223352096	0.032377019	0	0	0.016736185	0.062361203	0.888525593
03/08/20	2796	GBIF	PRESERVED_SPECIMEN	NY	1931053618	SPECIES	Theobroma	guianense	0	Theobroma guianense (Aubl.) J.F.Gmel.	Gomes, B.M.; et al.	562	25/10/11	-9.2925	-64.65825	1424452474	20/11/20	Madeira province	24587	0	0	6138	73033	989942	0.777572666	0.865239799	0.208227848	0.022480571	0	0	0.005612142	0.066776081	0.905131206
03/08/20	4197	GBIF	PRESERVED_SPECIMEN	FMB	1707512785	SPECIES	Theobroma	guianense	0	Theobroma guianense (Aubl.) J.F.Gmel.	Londono, C.; et al.	830	09/12/89	-0.566667	-72.133333	1932874555	05/03/21	Imerí province	62231	0	0	23542	44120	924092	0.755338907	0.836630523	0.226952747	0.059043535	0	0	0.022336181	0.041860178	0.876760106
03/08/20	4199	GBIF	PRESERVED_SPECIMEN	FMB	1707512040	SPECIES	Theobroma	guianense	0	Theobroma guianense (Aubl.) J.F.Gmel.	Cordoba, M.; et al.	1977	05/02/96	2.20525	-71.164139	768730461	17/03/21	Imerí province	3664	0	0	1584	8136	1046555	0.826658385	0.83768481	0.071108588	0.003456803	0	0	0.001494426	0.007675913	0.987372858
03/08/20	4200	GBIF	PRESERVED_SPECIMEN	FMB	1707512027	SPECIES	Theobroma	guianense	0	Theobroma guianense (Aubl.) J.F.Gmel.	Cordoba, M.; et al.	2095	07/02/96	2.14975	-71.181	1707512027	05/03/21	Imerí province	3664	0	0	1584	8136	1046555	0.826658385	0.83768481	0.071108588	0.003456803	0	0	0.001494426	0.007675913	0.987372858
03/08/20	4201	GBIF	PRESERVED_SPECIMEN	FMB	1707506832	SPECIES	Herrania	nitida	0	Herrania nitida (Poepp.) R.E.Schult.	Rudas, A. & Prieto, A.	3172	27/09/91	-3.783333	-70.25	1321677582	07/06/21	Imerí province	51884	0	0	20991	72181	650100	0.692628188	0.798938602	0.245448333	0.065250089	0	0	0.026398593	0.090775898	0.817575419
03/08/20	4208	GBIF	PRESERVED_SPECIMEN	FMB	1707505848	SPECIES	Theobroma	microcarpum	0	Theobroma microcarpum Mart.	Rudas, A.; et al.	1426	01/03/91	-3.733333	-70.25	1707505848	05/03/21	Imerí province	51884	0	0	20991	72181	650100	0.692628188	0.798938602	0.245448333	0.065250089	0	0	0.026398593	0.090775898	0.817575419
03/08/20	3041	GBIF	PRESERVED_SPECIMEN	NY	1929511253	SPECIES	Theobroma	speciosum	0	Theobroma speciosum Willd. ex Spreng.	Simon, M.F.; et al.	1019	18/10/10	-9.2569444	-64.6647222	1094912553	17/08/20	Madeira province	24587	0	0	6138	73033	989942	0.777572666	0.865239799	0.208227848	0.022480571	0	0	0.005612142	0.066776081	0.905131206
03/08/20	4212	GBIF	PRESERVED_SPECIMEN	FMB	1707501638	SPECIES	Herrania	laciniifolia	0	Herrania laciniifolia Goudot ex Triana & Planch.	Mendoza, H.; et al.	18553	15/10/15	5.163417	-74.812383	1707501638	10/11/20	Magdalena province	82000	0	0	67864	372422	683258	0.580985662	0.638953388	0.218157803	0.068019085	0	0	0.056293258	0.308924436	0.566763221
03/08/20	4213	GBIF	PRESERVED_SPECIMEN	FMB	1707501306	SPECIES	Herrania	purpurea	0	Herrania purpurea (Pittier) R.E.Schult.	Gonzalez, M.; et al.	2415	23/11/14	8.224306	-77.197306	1707501306	08/12/20	Pacific dominion	685920	0	0	19840	63026	413807	0.261064666	-0.036093418	0.412508189	0.58001358	0	0	0.016776693	0.053294751	0.349914975
03/08/20	4215	GBIF	PRESERVED_SPECIMEN	FMB	1707497677	SPECIES	Herrania	albiflora	0	Herrania albiflora Goudot	Medina, M.M.	96	19/02/15	7.268	-73.359	0	09/11/20	Magdalena province	53645	0	0	19358	158867	973693	0.700395185	0.772315681	0.22018756	0.044497882	0	0	0.016057228	0.131778265	0.807666625
03/08/20	582	GBIF	PRESERVED_SPECIMEN	WAG	2517708174	SPECIES	Herrania	albiflora	0	Herrania albiflora Goudot	Poole, H.A.C.	45	01/01/66	9.9067054	-83.6800512	2516186978	25/04/21	Puntarenas-Chiriquí province	350250	0	0	33738	101317	719380	0.488029121	0.739880562	0.463435559	0.290739903	0	0	0.028005661	0.084102483	0.597151953
03/08/20	4223	GBIF	PRESERVED_SPECIMEN	UDBC	1703246014	SPECIES	Theobroma	obovatum	0	Theobroma obovatum Klotzsch ex Bernoulli	\ariza, W.; et al. 5020 17/9/2016 2.4594440 -72.7580560 25/09/2020
03/08/20	4236	GBIF	PRESERVED_SPECIMEN	TOLI	1702875373	SPECIES	Herrania	balaensis		Herrania balaensis Preuss	Villanueva, B.; et al.	3073	17/10/16	7.063683	-74.19035		12/11/20
03/08/20	4241	GBIF	PRESERVED_SPECIMEN	F	1701754445	SPECIES	Theobroma	guianense		Theobroma guianense (Aubl.) J.F.Gmel.	DÃ­az, C.	1644	10/03/81	-9.1839	-74.14	1701754445	05/01/21
03/08/20	4249	GBIF	PRESERVED_SPECIMEN	W	1701550452	SPECIES	Theobroma	guianense		Theobroma guianense (Aubl.) J.F.Gmel.	Gingzberger, A. & Zerny, H.	801	23/08/27	-10.8339	-52.8731	1424762769	26/03/21
03/08/20	4269	GBIF	PRESERVED_SPECIMEN	W	1701526035	SPECIES	Herrania	mariae		Herrania mariae var. putumayonis R.E.Schult.	Entry, R.P.	s.n.	//	0	0	1701525405	13/05/21
03/08/20	13069	GBIF	PRESERVED_SPECIMEN	HUA	1123900203	SPECIES	Theobroma	glaucum		Theobroma glaucum H.Karst.	Taborda, A. & Londono, L.	417	03/11/10	7.361128	-75.031581	1123900203	07/09/20
03/08/20	3210	GBIF	PRESERVED_SPECIMEN	NY	1928485884	SPECIES	Theobroma	speciosum		Theobroma speciosum Willd. ex Spreng.	Forzza, R.C.; et al.	8953	20/11/16	-3.052778	-54.928611	1928485884	12/04/21
03/08/20	4310	GBIF	PRESERVED_SPECIMEN	FAUC	1576185484	SPECIES	Herrania	laciniifolia		Herrania laciniifolia Goudot ex Triana & Planch.	Vargas, W.G.	6255	//	5.64026	-74.85999		10/11/20
03/08/20	13885	GBIF	PRESERVED_SPECIMEN	CHOCO	1065431112	SPECIES	Theobroma	nemorale		Theobroma nemorale Cuatrec.	Pardo, M.; et al.	33	17/02/92	5.59564	-77.47615	1065431112	30/10/20
03/08/20	10253	GBIF	PRESERVED_SPECIMEN	MO	1260580807	SPECIES	Herrania	nitida		Herrania nitida (Poepp.) R.E.Schult.	Jaramillo, J.L.	8350	05/04/86	-0.4333333	-77.0166667	1260580807	04/12/20
03/08/20	4591	GBIF	PRESERVED_SPECIMEN	RB	1499294980	SPECIES	Herrania	mariae		Herrania mariae (Mart.) Decne. ex Goudot	Mattos, J.R. & Nadruz, M.	578	/4/2017	-22.967697	-43.224604	1499294980	04/05/21
03/08/20	4611	GBIF	PRESERVED_SPECIMEN	US	1456427041	SPECIES	Herrania	lemniscata		Herrania lemniscata (Schomb.) R.E.Schult.	Clarke, H.D.	1555	31/03/96	4.38778	-58.9172		10/11/20
03/08/20	4612	GBIF	PRESERVED_SPECIMEN	US	1456406816	SPECIES	Theobroma	guianense		Theobroma guianense (Aubl.) J.F.Gmel.	DÃ­az, W.A.; et al.	7472	05/02/05	1.2751667	-66.4766667	1320188375	29/03/21
03/08/20	4614	GBIF	PRESERVED_SPECIMEN	US	1456381748	SPECIES	Theobroma	guianense		Theobroma guianense (Aubl.) J.F.Gmel.	Hoffman, B.	6266	05/05/05	2.325	-56.7889		05/01/21
03/08/20	4615	GBIF	PRESERVED_SPECIMEN	US	1456370986	SPECIES	Herrania	kanukuensis		Herrania kanukuensis R.E.Schult.	Hoffman, B. & Foster, R.	3503	06/02/93	3.35	-59.5	1456370986	27/04/21
03/08/20	4616	GBIF	PRESERVED_SPECIMEN	US	1456364770	SPECIES	Theobroma	guianense		Theobroma guianense (Aubl.) J.F.Gmel.	Henkel, T.; et al.	2923	13/09/93	2.23333	-59.1833	1456364770	05/01/21
03/08/20	4618	GBIF	PRESERVED_SPECIMEN	US	1456359562	SPECIES	Herrania	kanukuensis		Herrania kanukuensis R.E.Schult.	Clarke, H.D.; et al.	8177	03/09/99	1.565	-59.2383	1456359562	27/04/21
03/08/20	4620	GBIF	PRESERVED_SPECIMEN	US	1456340355	SPECIES	Theobroma	guianense		Theobroma guianense (Aubl.) J.F.Gmel.	Clarke, H.D.; et al.	7653	09/09/98	1.38639	-58.9464	2515540097	05/01/21
03/08/20	4625	GBIF	PRESERVED_SPECIMEN	US	1456198385	SPECIES	Theobroma	guianense		Theobroma guianense (Aubl.) J.F.Gmel.	Bordenave, B.; et al.	8504	14/04/06	4.3869444	-57.1119444	1456198385	05/01/21
03/08/20	4627	GBIF	PRESERVED_SPECIMEN	US	1456160976	SPECIES	Theobroma	guianense		Theobroma guianense (Aubl.) J.F.Gmel.	Hoffman, B.	5757	29/02/04	2.44444	-56.8617		05/01/21
03/08/20	4630	GBIF	PRESERVED_SPECIMEN	US	1456132540	SPECIES	Theobroma	guianense		Theobroma guianense (Aubl.) J.F.Gmel.	Clarke, H.D.; et al.	7775	12/09/98	1.42139	-58.9519	1456132540	05/01/21
03/08/20	4632	GBIF	PRESERVED_SPECIMEN	US	1456121525	SPECIES	Theobroma	guianense		Theobroma guianense (Aubl.) J.F.Gmel.	Clarke, H.D.; et al.	2955	04/11/96	1.33694	-58.8486	1456121525	05/01/21
03/08/20	4636	GBIF	PRESERVED_SPECIMEN	US	1456074060	SPECIES	Herrania	lemniscata		Herrania lemniscata (Schomb.) R.E.Schult.	B. Hoffman, H.D.C.R. & Allicock, D.	4920	22/11/95	4.34072	-58.8091		10/11/20
03/08/20	4637	GBIF	PRESERVED_SPECIMEN	US	1456067246	SPECIES	Theobroma	guianense		Theobroma guianense (Aubl.) J.F.Gmel.	Clarke, H.D.; et al.	8371	09/09/99	1.565	-59.2383	1456067246	17/03/21
03/08/20	4638	GBIF	PRESERVED_SPECIMEN	US	1456006052	SPECIES	Herrania	kanukuensis		Herrania kanukuensis R.E.Schult.	Hoffman, B.	6383	03/09/05	2.35056	-56.7722	2516952810	27/04/21
03/08/20	4640	GBIF	PRESERVED_SPECIMEN	US	1455984471	SPECIES	Herrania	kanukuensis		Herrania kanukuensis R.E.Schult.	Hoffman, B.	6338	01/07/05	2.33661	-56.7914	1931121694	27/04/21
03/08/20	4683	GBIF	PRESERVED_SPECIMEN	F	1424786235	SPECIES	Herrania	balaensis		Herrania balaensis Preuss	Cuatrecasas, J. & Cope, F.W.	25798	01/09/61	10.74033	-61.55876	1424786235	12/11/20
03/08/20	4684	GBIF	PRESERVED_SPECIMEN	F	1424786217	HYBRID	Theobroma	guianense		Theobroma subincanum Mart. Ã Theobroma obovatum Klotzsch ex Bernoulli	Cope, F.W. & Cuatrecasas, J.	25797	01/09/61	0	0	1424786217	16/03/21
03/08/20	4691	GBIF	PRESERVED_SPECIMEN	F	1424786194	SPECIES	Theobroma	obovatum		Theobroma obovatum Klotzsch ex Bernoulli	Cuatrecasas, J.; et al.	25783T	31/08/61	10.7435	-61.5562	1424786194	28/09/20
03/08/20	4700	GBIF	PRESERVED_SPECIMEN	F	1424785762	SPECIES	Herrania	purpurea		Herrania purpurea (Pittier) R.E.Schult.	Cuatrecasas, J. & Willard, L.	26139	01/10/61	7.58529	-76.62998	1424785762	08/12/20
03/08/20	4702	GBIF	PRESERVED_SPECIMEN	F	1424785353	SPECIES	Theobroma	chocoense		Theobroma chocoense Cuatrec.	Cuatrecasas, J. & PatiÃ±o, V.M.	27460	21/02/69	3.9461	-76.989	1424785353	22/10/20
03/08/20	4709	GBIF	PRESERVED_SPECIMEN	F	1424762824	SPECIES	Theobroma	guianense		Theobroma guianense (Aubl.) J.F.Gmel.	Cuatrecasas, J.	7178A	10/10/39	0.85865	-70.84697	1424762824	17/03/21
03/08/20	4712	GBIF	PRESERVED_SPECIMEN	F	1424762816	SPECIES	Theobroma	guianense		Theobroma guianense (Aubl.) J.F.Gmel.	Schultes, R.E.	6536	20/09/45	-4.203165	-69.935907	1424762816	17/03/21
03/08/20	4717	GBIF	PRESERVED_SPECIMEN	F	1424762809	SPECIES	Theobroma	guianense		Theobroma guianense (Aubl.) J.F.Gmel.	Little, E.L. & Little, R.R.	9544	04/03/45	0.7488307	-75.2325525	1424762809	17/03/21
03/08/20	4719	GBIF	PRESERVED_SPECIMEN	F	1424762806	SPECIES	Theobroma	guianense		Theobroma guianense (Aubl.) J.F.Gmel.	PatiÃ±o, V.M.	22	18/11/51	2.9023231	-75.276343	1317883033	17/03/21
03/08/20	4722	GBIF	PRESERVED_SPECIMEN	F	1424762801	SPECIES	Theobroma	guianense		Theobroma guianense (Aubl.) J.F.Gmel.	Jansen-Jacobs, M.J.; et al.	2996	18/10/92	3.7751706	-59.081582	1424762801	17/03/21
03/08/20	4723	GBIF	PRESERVED_SPECIMEN	F	1424762800	SPECIES	Theobroma	guianense		Theobroma guianense (Aubl.) J.F.Gmel.	Williams, L.	15204	06/05/42	3.1476392	-65.8605236	1424762800	17/03/21
03/08/20	4727	GBIF	PRESERVED_SPECIMEN	F	1424762796	SPECIES	Theobroma	guianense		Theobroma guianense (Aubl.) J.F.Gmel.	Cabrera, I.	3734	08/10/75	3.8811	-72.8667	1424762796	17/03/21
03/08/20	4737	GBIF	PRESERVED_SPECIMEN	F	1424762783	SPECIES	Theobroma	guianense		Theobroma guianense (Aubl.) J.F.Gmel.	Baker, R.E.D. & Cope, F.W.	T3	23/08/52	-0.6557321	-70.2596283	1321194106	17/03/21
03/08/20	5628	GBIF	PRESERVED_SPECIMEN	US	1320831935	SPECIES	Theobroma	velutinum		Theobroma velutinum Benoist	Grenand, P.	2881	17/08/92	3.165198	-52.341464	1320831935	10/08/20
03/08/20	4742	GBIF	PRESERVED_SPECIMEN	F	1424762778	SPECIES	Theobroma	guianense		Theobroma guianense (Aubl.) J.F.Gmel.	Schultes, R.E. & Cabrera, I.	19117	13/04/53	0.25	-70.75	1228429901	18/03/21
03/08/20	4749	GBIF	PRESERVED_SPECIMEN	F	1424762770	SPECIES	Theobroma	guianense		Theobroma guianense (Aubl.) J.F.Gmel.	Gentry, A.H.; et al.	29260	01/08/80	-4.0833333	-72.8	1424762770	18/03/21
03/08/20	4751	GBIF	PRESERVED_SPECIMEN	F	1424762768	SPECIES	Theobroma	guianense		Theobroma guianense (Aubl.) J.F.Gmel.	Gentry, A.H. & Daly, D.C.	18784	28/03/77	-9.3140208	-75.9966689	1424762768	18/03/21
03/08/20	4752	GBIF	PRESERVED_SPECIMEN	F	1424762766	SPECIES	Theobroma	guianense		Theobroma guianense (Aubl.) J.F.Gmel.	Gentry, A.H.; et al.	42452	01/07/83	-3.4666667	-72.8333333	1424762766	18/03/21
03/08/20	4753	GBIF	PRESERVED_SPECIMEN	F	1424762765	SPECIES	Theobroma	guianense		Theobroma guianense (Aubl.) J.F.Gmel.	Gentry, A.H.; et al.	52226	11/10/85	-6.0166667	-75.9166667	1424762765	18/03/21
03/08/20	4754	GBIF	PRESERVED_SPECIMEN	F	1424762764	SPECIES	Theobroma	guianense		Theobroma guianense (Aubl.) J.F.Gmel.	Gentry, A.H. & Revilla, J.	1205	//	-4.897504	-73.7007088	1424762764	19/03/21
03/08/20	4759	GBIF	PRESERVED_SPECIMEN	F	1424762759	SPECIES	Theobroma	guianense		Theobroma guianense (Aubl.) J.F.Gmel.	DÃ­az, C.; et al.	10639	06/02/99	-5.038421	-78.3842227	1424762759	19/03/21
03/08/20	4764	GBIF	PRESERVED_SPECIMEN	F	1424762754	SPECIES	Theobroma	guianense		Theobroma guianense (Aubl.) J.F.Gmel.	Gentry, A.H.; et al.	62005	28/02/88	-5.8333333	-76.1166667	1424762754	19/03/21
03/08/20	2729	GBIF	PRESERVED_SPECIMEN	COAH	1932876573	SPECIES	Theobroma	glaucum		Theobroma glaucum H.Karst.	SÃ¡nchez, M.; et al.	6386	03/10/97	-1.02	-71.55	1932876573	04/09/20
03/08/20	4768	GBIF	PRESERVED_SPECIMEN	F	1424762750	SPECIES	Theobroma	guianense		Theobroma guianense (Aubl.) J.F.Gmel.	Wurdack, J.J.	2357	19/10/62	-4.4610848	-77.5787115	1424762750	22/03/21
03/08/20	4769	GBIF	PRESERVED_SPECIMEN	F	1424762749	SPECIES	Theobroma	guianense		Theobroma guianense (Aubl.) J.F.Gmel.	Stein, B.A.	2411	13/03/85	-11	-74.75	1424762749	22/03/21
03/08/20	4772	GBIF	PRESERVED_SPECIMEN	F	1424762746	SPECIES	Theobroma	guianense		Theobroma guianense (Aubl.) J.F.Gmel.	Holliday, P.C. & Bartley, B.G.	43	28/10/52	0.92414	-71.0304699	1424762746	22/03/21
03/08/20	4777	GBIF	PRESERVED_SPECIMEN	F	1424762741	SPECIES	Theobroma	guianense		Theobroma guianense (Aubl.) J.F.Gmel.	Klug, G.	87	/10/1929	-5.8967563	-76.1029554	1424762741	29/03/21
03/08/20	4779	GBIF	PRESERVED_SPECIMEN	F	1424762739	SPECIES	Theobroma	guianense		Theobroma guianense (Aubl.) J.F.Gmel.	Blasido, E. & Becerra, E.	149	17/10/06	-9.2663889	-74.8416667	1424762739	29/03/21
03/08/20	4781	GBIF	PRESERVED_SPECIMEN	F	1424762737	SPECIES	Theobroma	guianense		Theobroma guianense (Aubl.) J.F.Gmel.	Ruiz, J.	1204	10/04/88	-4.1666667	-73.5	1424762737	29/03/21
03/08/20	4782	GBIF	PRESERVED_SPECIMEN	F	1424762736	SPECIES	Theobroma	guianense		Theobroma guianense (Aubl.) J.F.Gmel.	Rimachi, M.Y.	2612	13/10/76	-4.2903427	-81.2543799	1424762736	29/03/21
03/08/20	4784	GBIF	PRESERVED_SPECIMEN	F	1424762734	SPECIES	Theobroma	guianense		Theobroma guianense (Aubl.) J.F.Gmel.	Irvine, D.	251	22/11/82	-0.5	-77.6666667	1424762734	13/04/21
03/08/20	4785	GBIF	PRESERVED_SPECIMEN	F	1424762733	SPECIES	Theobroma	guianense		Theobroma guianense (Aubl.) J.F.Gmel.	Lugo, H.	3904	03/10/74	-1.733333	-77.483333	1424762733	29/03/21
03/08/20	4791	GBIF	PRESERVED_SPECIMEN	F	1424762727	SPECIES	Theobroma	guianense		Theobroma guianense (Aubl.) J.F.Gmel.	Dik, A.	604	06/10/93	-0.8	-76.4667	1424762727	29/03/21
03/08/20	4794	GBIF	PRESERVED_SPECIMEN	F	1424762724	SPECIES	Theobroma	guianense		Theobroma guianense (Aubl.) J.F.Gmel.	Jipa, D. & Irvine, D.	1063	29/04/84	-0.5	-77.3333333	1424762724	29/03/21
03/08/20	4795	GBIF	PRESERVED_SPECIMEN	F	1424762723	SPECIES	Theobroma	guianense		Theobroma guianense (Aubl.) J.F.Gmel.	Dik, A.	278	06/09/93	-0.6833	-76.4833	1424762723	29/03/21
03/08/20	4797	GBIF	PRESERVED_SPECIMEN	F	1424762721	SPECIES	Theobroma	guianense		Theobroma guianense (Aubl.) J.F.Gmel.	Pinos, R.E.; et al.	90	18/11/95	-1.5	-77.9333333	1424762721	29/03/21
03/08/20	4798	GBIF	PRESERVED_SPECIMEN	F	1424762720	SPECIES	Theobroma	guianense		Theobroma guianense (Aubl.) J.F.Gmel.	Monteagudo, A.; et al.	10809	18/10/05	-10.3869	-75.0911	1424762720	29/03/21
03/08/20	4799	GBIF	PRESERVED_SPECIMEN	F	1424762719	SPECIES	Theobroma	guianense		Theobroma guianense (Aubl.) J.F.Gmel.	Marles, R.	61	11/06/85	-1.0083333	-77.5	1424762719	29/03/21
03/08/20	4804	GBIF	PRESERVED_SPECIMEN	F	1424762714	SPECIES	Theobroma	guianense		Theobroma guianense (Aubl.) J.F.Gmel.	Rojas, R.; et al.	534	08/11/97	-5.0566667	-78.3380556	1424762714	29/03/21
03/08/20	4806	GBIF	PRESERVED_SPECIMEN	F	1424762712	SPECIES	Theobroma	guianense		Theobroma guianense (Aubl.) J.F.Gmel.	Gentry, A.H. & Aronson, J.	25001	24/02/79	-73.5	-3.8333333	1424762712	29/03/21
03/08/20	4809	GBIF	PRESERVED_SPECIMEN	F	1424762709	SPECIES	Theobroma	guianense		Theobroma guianense (Aubl.) J.F.Gmel.	Flores, S.	5	/2/1983	-3.7420883	-73.2502451	1424762709	29/03/21
03/08/20	4813	GBIF	PRESERVED_SPECIMEN	F	1424762705	SPECIES	Theobroma	guianense		Theobroma guianense (Aubl.) J.F.Gmel.	VÃ¡squez, R.; et al.	2072	01/07/81	-73.75	-4.8333333	1424762705	29/03/21
03/08/20	4814	GBIF	PRESERVED_SPECIMEN	RB	1424514041	SPECIES	Herrania	nitida		Herrania nitida (Poepp.) R.E.Schult.	Bloemer, H.C.	7	28/07/15	-22.9268821	-43.4558253	1424514041	26/04/21
03/08/20	4816	GBIF	PRESERVED_SPECIMEN	RB	1424502448	SPECIES	Theobroma	guianense		Theobroma guianense (Aubl.) J.F.Gmel.	Mattos, J.R. & Nadruz, M.	8	06/02/15	-22.9674	-43.2235	1424502448	23/09/20
03/08/20	3353	GBIF	PRESERVED_SPECIMEN	RB	1902144359	SPECIES	Theobroma	speciosum		Theobroma speciosum Willd. ex Spreng.	Medeiros, T.K.A.	4	17/05/17	-10.814444	-65.027778	1902144359	18/08/20
03/08/20	4821	GBIF	PRESERVED_SPECIMEN	RB	1424492793	SPECIES	Herrania	nitida		Herrania nitida (Poepp.) R.E.Schult.	Mattos, J.R. & Nadruz, M.	1	22/09/14	-22.967697	-43.224604	1424492793	26/04/21
03/08/20	4822	GBIF	PRESERVED_SPECIMEN	RB	1424482931	SPECIES	Herrania	mariae		Herrania mariae (Mart.) Decne. ex Goudot	Quinet, A.	2854	05/12/12	-9.380556	-71.900278	1424482931	04/05/21
03/08/20	3679	GBIF	PRESERVED_SPECIMEN	RB	1852375246	SPECIES	Theobroma	speciosum		Theobroma speciosum Willd. ex Spreng.	Castro, W.; et al.	3417	25/11/17	-3.256667	-46.743611		12/04/21
03/08/20	3687	GBIF	PRESERVED_SPECIMEN	RB	1852375025	SPECIES	Theobroma	speciosum		Theobroma speciosum Willd. ex Spreng.	Castro, W.; et al.	3083	11/11/17	-5.628056	-50.387778		12/04/21
03/08/20	4831	GBIF	PRESERVED_SPECIMEN	RB	1424439866	SPECIES	Theobroma	sylvestre		Theobroma sylvestre Mart.	Kinupp, V.F.; et al.	4136	03/04/10	-3.081406	-59.929411		31/08/20
03/08/20	4832	GBIF	PRESERVED_SPECIMEN	RB	1424439807	SPECIES	Theobroma	guianense		Theobroma guianense (Aubl.) J.F.Gmel.	Kinupp, V.F.; et al.	3580	19/01/09	-2.63673	-60.97884	1424439807	20/11/20
03/08/20	4833	GBIF	PRESERVED_SPECIMEN	RB	1424439797	SPECIES	Theobroma	guianense		Theobroma guianense (Aubl.) J.F.Gmel.	Kinupp, V.F.; et al.	3903	26/09/09	-3.13426	-60.02153	1424439797	20/11/20
03/08/20	4835	GBIF	PRESERVED_SPECIMEN	RB	1424426939	SPECIES	Theobroma	obovatum		Theobroma obovatum Klotzsch ex Bernoulli	Resgate, E.	773	17/10/08	-9.1533708	-64.3064811		12/04/21
03/08/20	4837	GBIF	PRESERVED_SPECIMEN	RB	1424408252	SPECIES	Herrania	mariae		Herrania mariae (Mart.) Decne. ex Goudot	Nadruz, M. & R. Azoury, G.M.	2563	20/03/12	0.686389	-61.566111	1424408220	28/04/22
03/08/20	4838	GBIF	PRESERVED_SPECIMEN	RB	1424408220	SPECIES	Herrania	mariae		Herrania mariae (Mart.) Decne. ex Goudot	Nadruz, M. & R. Azoury, G.M.	2536	19/03/12	0.9913088	-61.4708729	1424408220	28/04/22
03/08/20	4842	GBIF	PRESERVED_SPECIMEN	RB	1424374451	SPECIES	Theobroma	guianense		Theobroma guianense (Aubl.) J.F.Gmel.	Torke, B.M.; et al.	767	07/05/11	-3.09	-55.136389	1424374451	20/11/20
03/08/20	4843	GBIF	PRESERVED_SPECIMEN	RB	1424367921	SPECIES	Theobroma	microcarpum		Theobroma microcarpum Mart.	Medeiros, H. & Oliveira, E.C.	44	08/11/08	-10.066667	-67.616667		12/04/21
03/08/20	3688	GBIF	PRESERVED_SPECIMEN	RB	1852374990	SPECIES	Theobroma	speciosum		Theobroma speciosum Willd. ex Spreng.	Castro, W.; et al.	2636	17/10/17	-9.021667	-58.618056		12/04/21
03/08/20	4847	GBIF	PRESERVED_SPECIMEN	RB	1424313037	SPECIES	Theobroma	obovatum		Theobroma obovatum Klotzsch ex Bernoulli	Quinet, A. & M. Bovini, L.E.S.B.B.	1917-A	10/12/09	-8.374167	-68.339167		12/04/21
03/08/20	4848	GBIF	PRESERVED_SPECIMEN	RB	1424310115	SPECIES	Theobroma	microcarpum		Theobroma cacao L.	Daly, D.C.	12062	30/09/03	-10.4927778	-67.9008333	1318236438	12/04/21
03/08/20	4849	GBIF	PRESERVED_SPECIMEN	RB	1424310096	SPECIES	Theobroma	guianense		Theobroma guianense (Aubl.) J.F.Gmel.	Daly, D.C.; et al.	12136	04/10/03	-9.979444	-66.801389	1424310096	20/11/20
03/08/20	4850	GBIF	PRESERVED_SPECIMEN	RB	1424310065	SPECIES	Theobroma	microcarpum		Theobroma microcarpum Mart.	Daly, D.C.; et al.	12195	05/10/03	-9.7888889	-66.7638889	1424310065	17/09/20
03/08/20	4853	GBIF	PRESERVED_SPECIMEN	RB	1424281283	SPECIES	Theobroma	guianense		Theobroma guianense (Aubl.) J.F.Gmel.	Fiaschi, P.; et al.	3282	21/08/08	-7.446389	-73.6575	1928434701	20/11/20
03/08/20	4854	GBIF	PRESERVED_SPECIMEN	RB	1424279212	SPECIES	Theobroma	obovatum		Theobroma obovatum Klotzsch ex Bernoulli	Daly, D.C.; et al.	13161	04/07/08	-9.409444	-68.601667	1319960780	19/11/20
03/08/20	4856	GBIF	PRESERVED_SPECIMEN	RB	1424202650	SPECIES	Theobroma	guianense		Theobroma guianense (Aubl.) J.F.Gmel.	LobÃ£o, A.; et al.	967	04/09/05	3.2125	-52.021944	1424202650	20/11/20
03/08/20	3704	GBIF	PRESERVED_SPECIMEN	RB	1852374368	SPECIES	Theobroma	speciosum		Theobroma speciosum Willd. ex Spreng.	Castro, W.; et al.	3482	27/11/17	-3.6225	-46.799722	1852374368	18/08/20
03/08/20	3705	GBIF	PRESERVED_SPECIMEN	RB	1852374332	SPECIES	Theobroma	speciosum		Theobroma speciosum Willd. ex Spreng.	Castro, W.; et al.	3221	15/11/17	-5.675278	-50.319167		18/08/20
03/08/20	4878	GBIF	PRESERVED_SPECIMEN	RB	1424167292	SPECIES	Theobroma	sylvestre		Theobroma sylvestre Mart.	Ducke, A.	s.n.	08/12/06	0.2541844	-57.1497117	1318060491	31/08/20
03/08/20	4885	GBIF	PRESERVED_SPECIMEN	RB	1424167275	SPECIES	Theobroma	guianense		Theobroma guianense (Aubl.) J.F.Gmel.	Irwin, H.S.; et al.	54893	19/08/63	3.6	-56.5	1424167275	20/11/20
03/08/20	4888	GBIF	PRESERVED_SPECIMEN	RB	1424167271	SPECIES	Theobroma	sylvestre		Theobroma sylvestre Mart.	Juan, G.S.A. & Barbosa, E.F.	83	19/11/03	-1.028611	-62.089167		11/11/20
03/08/20	3769	GBIF	PRESERVED_SPECIMEN	MBM	1848246511	SPECIES	Theobroma	speciosum		Theobroma speciosum Willd. ex Spreng.	Engels, M.E. & Sardelli, L.	3749	22/10/15	-10.815278	-55.429722	1848246511	18/08/20
03/08/20	3855	GBIF	PRESERVED_SPECIMEN	RB	1844893745	SPECIES	Theobroma	speciosum		Theobroma speciosum Willd. ex Spreng.	Costa, D.S.; et al.	1529	25/08/17	-9.315	-62.831389		12/04/21
03/08/20	4018	GBIF	PRESERVED_SPECIMEN	RB	1827466454	SPECIES	Theobroma	speciosum		Theobroma speciosum Willd. ex Spreng.	Forzza, R.C.; et al.	9153	20/10/17	-9.036944	-58.602222		12/04/21
03/08/20	4899	GBIF	PRESERVED_SPECIMEN	RB	1424167251	SPECIES	Theobroma	sylvestre		Theobroma sylvestre Mart.	Egler, S.G.; et al.	808	/11/1993	-2.707785	-60.4121569		11/11/20
03/08/20	4818	GBIF	PRESERVED_SPECIMEN	RB	1424500487	SPECIES	Theobroma	speciosum		Theobroma speciosum Willd. ex Spreng.	Silva, D.A.E.	PSACF_EX03942	16/10/14	-3.178611	-51.785833		12/04/21
03/08/20	4915	GBIF	PRESERVED_SPECIMEN	RB	1424167220	SPECIES	Theobroma	obovatum		Theobroma obovatum Klotzsch ex Bernoulli	Soler, J.G.A.	183	04/12/03	-1.028611	-62.089167	694272934	05/10/20
03/08/20	4916	GBIF	PRESERVED_SPECIMEN	RB	1424167219	SPECIES	Theobroma	obovatum		Theobroma obovatum Klotzsch ex Bernoulli	Ducke, A.	s.n.	27/09/04	-4.4683806	-65.5293501	1424167219	05/10/20
03/08/20	4819	GBIF	PRESERVED_SPECIMEN	RB	1424500408	SPECIES	Theobroma	speciosum		Theobroma speciosum Willd. ex Spreng.	Silva, D.A.E.	PSACF_EX03904	15/10/14	-3.178889	-51.786389		12/04/21
03/08/20	4923	GBIF	PRESERVED_SPECIMEN	RB	1424167211	SPECIES	Theobroma	sylvestre		Theobroma sylvestre Mart.	Ducke, A.	s.n.	07/01/04	-0.1704006	-55.6749531	1322977912	31/08/20
03/08/20	4934	GBIF	PRESERVED_SPECIMEN	RB	1424167191	SPECIES	Theobroma	microcarpum		Theobroma microcarpum Mart.	Soler, J.G.A. & Barbosa, E.F.	89	19/11/03	-1.0286111	-62.0891667	1424167191	16/09/20
03/08/20	4828	GBIF	PRESERVED_SPECIMEN	RB	1424451551	SPECIES	Theobroma	speciosum		Theobroma speciosum Willd. ex Spreng.	Simao, M.V.R.C.; et al.	217	20/08/12	-9.170171	-63.045024		12/04/21
03/08/20	4846	GBIF	PRESERVED_SPECIMEN	RB	1424362486	SPECIES	Theobroma	speciosum		Theobroma speciosum Willd. ex Spreng.	Daly, D.C.; et al.	12181	05/10/03	-9.955556	-66.763889		20/11/20
03/08/20	4944	GBIF	PRESERVED_SPECIMEN	RB	1424167178	SPECIES	Theobroma	guianense		Theobroma guianense (Aubl.) J.F.Gmel.	Duarte, A.P.	6575	10/09/62	-0.4652166	-63.4346975	1424167178	20/11/20
03/08/20	4949	GBIF	PRESERVED_SPECIMEN	RB	1424167172	SPECIES	Theobroma	guianense		Theobroma guianense (Aubl.) J.F.Gmel.	Fontella, J. & Caruzo, J.	2755	09/08/91	-22.967697	-43.224604		12/04/21
03/08/20	4950	GBIF	PRESERVED_SPECIMEN	RB	1424167171	SPECIES	Theobroma	obovatum		Theobroma obovatum Klotzsch ex Bernoulli	Ducke, A.	s.n.	04/02/26	-1.2407437	-48.459403	694624605	05/10/20
03/08/20	4953	GBIF	PRESERVED_SPECIMEN	RB	1424167168	SPECIES	Theobroma	guianense		Theobroma guianense (Aubl.) J.F.Gmel.	Soler, J.G.	55	17/11/03	-1.028611	-62.089167	1424167168	20/11/20
03/08/20	4955	GBIF	PRESERVED_SPECIMEN	RB	1424167162	SPECIES	Theobroma	guianense		Theobroma guianense (Aubl.) J.F.Gmel.	Equipe do Arboreto	s.n.	27/08/02	-22.9268821	-43.4558253	1424167162	20/11/20
03/08/20	4957	GBIF	PRESERVED_SPECIMEN	RB	1424167160	SPECIES	Theobroma	guianense		Theobroma guianense (Aubl.) J.F.Gmel.	Vattimo, I.; et al.	s.n.	/3/1991	-22.96735	-43.23377	1424167160	20/11/20
03/08/20	4964	GBIF	PRESERVED_SPECIMEN	RB	1424167151	SPECIES	Theobroma	microcarpum		Theobroma microcarpum Mart.	Pires, J.M. & Black, G.A.	742	23/11/45	-1.453353	-48.47601	1424167151	16/09/20
03/08/20	4990	GBIF	PRESERVED_SPECIMEN	RB	1424166675	SPECIES	Herrania	nitida		Herrania nitida (Poepp.) R.E.Schult.	Ducke, A.	s.n.	10/10/31	-4.4978517	-69.4512246	1424166675	26/04/21
03/08/20	4992	GBIF	PRESERVED_SPECIMEN	RB	1424166651	SPECIES	Herrania	nitida		Herrania nitida (Poepp.) R.E.Schult.	Ducke, A.	s.n.	26/08/06	-3.0506626	-69.0838059	1424166651	26/04/21
03/08/20	4993	GBIF	PRESERVED_SPECIMEN	RB	1424166648	SPECIES	Herrania	nitida		Herrania nitida (Poepp.) R.E.Schult.	Ducke, A.	s.n.	20/01/36	-2.6883577	-56.8539505	1424166648	26/04/21
03/08/20	4999	GBIF	PRESERVED_SPECIMEN	RB	1424166551	SPECIES	Herrania	mariae		Herrania mariae (Mart.) Decne. ex Goudot	Froes, R.L.	32515	17/11/55	-2.1845949	-52.5479451	1424166551	04/05/21
03/08/20	5002	GBIF	PRESERVED_SPECIMEN	RB	1423916596	SPECIES	Theobroma	guianense		Theobroma guianense (Aubl.) J.F.Gmel.	Torres, D.M.; et al.	357	27/02/15	-9.176667	-64.610556	1423916596	20/11/20
03/08/20	5003	GBIF	PRESERVED_SPECIMEN	RB	1423915231	SPECIES	Theobroma	guianense		Theobroma guianense (Aubl.) J.F.Gmel.	Costa, D.S.; et al.	900	29/03/16	-9.1975	-63.0175	1423915231	20/11/20
03/08/20	4858	GBIF	PRESERVED_SPECIMEN	RB	1424167903	SPECIES	Theobroma	speciosum		Theobroma speciosum Willd. ex Spreng.	Cid-Ferreira, C.A.; et al.	4686	20/06/84	-11.2	-61.016667	1927915529	17/08/20
03/08/20	4870	GBIF	PRESERVED_SPECIMEN	RB	1424167327	SPECIES	Theobroma	speciosum		Theobroma speciosum Willd. ex Spreng.	Soler, J.G. & Barbosa, E.F.	110	24/11/03	-1.028611	-62.089167	1424167327	18/08/20
03/08/20	4877	GBIF	PRESERVED_SPECIMEN	RB	1424167297	SPECIES	Theobroma	speciosum		Theobroma speciosum Willd. ex Spreng.	Gomes, J.C.	s.n.	/4/1991	-22.967697	-43.224604	1424167186	14/08/20
03/08/20	4882	GBIF	PRESERVED_SPECIMEN	RB	1424167280	SPECIES	Theobroma	speciosum		Theobroma speciosum Willd. ex Spreng.	Lisboa, A.	69	/8/1914	-1.7773178	-44.7885494	1424167280	18/08/20
03/08/20	5009	GBIF	PRESERVED_SPECIMEN	RB	1423899099	SPECIES	Theobroma	sylvestre		Theobroma sylvestre Mart.	Medeiros, H.	1502	20/03/14	-1.583056	-56.191111		26/08/20
03/08/20	14538	GBIF	PRESERVED_SPECIMEN	HUA	930989409	SPECIES	Herrania	albiflora		Herrania albiflora Goudot	Posada, A.; et al.	3802	21/07/98	7.51631	-75.94422	930989409	09/11/20
03/08/20	12940	GBIF	PRESERVED_SPECIMEN	COAH	1147293056	SPECIES	Theobroma	obovatum		Theobroma obovatum Klotzsch ex Bernoulli	Duivenvoorden, J.	1822	28/11/91	-0.83	-71.83	1147293056	25/09/20
03/08/20	5046	GBIF	PRESERVED_SPECIMEN	EAFM	1413715400	SPECIES	Theobroma	speciosum		Theobroma speciosum Willd. ex Spreng.	Kinupp, V.F. & Zanetti, A.D.	4682	06/07/12	-2.6259194	-60.259628		12/04/21
03/08/20	14733	GBIF	PRESERVED_SPECIMEN	COAH	768740024	SPECIES	Theobroma	guianense		Theobroma guianense (Aubl.) J.F.Gmel.	LÃ³pez, R.; et al.	901	19/11/95	1.96	-72.67	768740024	28/12/20
03/08/20	14732	GBIF	PRESERVED_SPECIMEN	COAH	768740345	SPECIES	Theobroma	microcarpum		Theobroma microcarpum Mart.	Defler, S.	632	10/02/90	-1.03	-69.58	768740345	16/09/20
03/08/20	14731	GBIF	PRESERVED_SPECIMEN	COAH	768740512	SPECIES	Theobroma	obovatum		Theobroma obovatum Klotzsch ex Bernoulli	CÃ¡rdenas, D. & MartÃ­nez, H.	6627	01/09/95	2.3397222	-71.2741667	768740512	25/09/20
03/08/20	14709	GBIF	PRESERVED_SPECIMEN	COAH	768745155	SPECIES	Theobroma	obovatum		Theobroma obovatum Klotzsch ex Bernoulli	CÃ¡rdenas, D.; et al.	8373	30/07/97	-2.15	-69.86	768745155	25/09/20
03/08/20	14727	GBIF	PRESERVED_SPECIMEN	COAH	768740726	SPECIES	Theobroma	obovatum		Theobroma obovatum Klotzsch ex Bernoulli	Palacios, E. & RodrÃ­guez, A.	93	15/01/96	-1.09	-69.52	768740726	25/09/20
03/08/20	14726	GBIF	PRESERVED_SPECIMEN	COAH	768740767	SPECIES	Theobroma	microcarpum		Theobroma microcarpum Mart.	PalÃ¡cios, E. & Rodriguez, A.	94	15/01/96	-1.09	-69.52	768740767	16/09/20
03/08/20	14725	GBIF	PRESERVED_SPECIMEN	COAH	768740817	SPECIES	Theobroma	guianense		Theobroma guianense (Aubl.) J.F.Gmel.	Palacios, E. RodrÃ­guez, A.	46	15/01/96	-1.09	-69.52	768740817	28/12/20
03/08/20	14722	GBIF	PRESERVED_SPECIMEN	COAH	768742376	SPECIES	Theobroma	guianense		Theobroma guianense (Aubl.) J.F.Gmel.	Rodriguez, M.; et al.	706	03/05/97	0.7	-76.77	768742376	28/12/20
03/08/20	5070	GBIF	PRESERVED_SPECIMEN	US	1322972015	SPECIES	Theobroma	guianense		Theobroma guianense (Aubl.) J.F.Gmel.	Aulestia, M. & Ima, I.	1527	15/01/94	-0.8333	-76.2333	1322972015	30/03/21
03/08/20	5074	GBIF	PRESERVED_SPECIMEN	US	1322948182	SPECIES	Herrania	purpurea	Theobroma purpureum Pittier	Herrania purpurea (Pittier) R.E.Schult.	Stern, W.L.; et al.	137	/6/1959	8.157787	-77.6918	1321319557	08/12/20
03/08/20	5080	GBIF	PRESERVED_SPECIMEN	US	1322918390	SPECIES	Herrania	purpurea		Herrania purpurea (Pittier) R.E.Schult.	Little, E.L.	25094	11/03/71	14.3167	-83.9333	1322918390	08/12/20
03/08/20	5085	GBIF	PRESERVED_SPECIMEN	US	1322909591	SPECIES	Theobroma	cirmolinae		Theobroma cirmolinae Cuatrec.	Holliday, P.C.	T-140	23/06/53	0	0		21/10/20
03/08/20	5091	GBIF	PRESERVED_SPECIMEN	US	1322887561	SPECIES	Theobroma	gileri		Theobroma gileri Cuatrec.	Schultes, R.E. & Cabrera, I.	18709	16-20/2/1953	7.3568	-76.4902	1322887561	20/09/20
03/08/20	5104	GBIF	PRESERVED_SPECIMEN	US	1322844030	SPECIES	Theobroma	guianense		Theobroma guianense (Aubl.) J.F.Gmel.	Silveira, M.; et al.	819	17/09/94	-8.3831	-71.2278	1322844030	30/03/21
03/08/20	5106	GBIF	PRESERVED_SPECIMEN	US	1322833867	SPECIES	Theobroma	guianense		Theobroma guianense (Aubl.) J.F.Gmel.	Schultes, R.E. & Cabrera, I.	15116	31/01/52	0.0833	-70.6667	2517422992	19/12/20
03/08/20	5120	GBIF	PRESERVED_SPECIMEN	US	1322799716	SPECIES	Theobroma	simiarum		Theobroma simiarum Donn.Sm.	Holliday, P.C. & Bartley, B.	176	04/08/53	5.6108586	-76.4283657		23/10/20
03/08/20	5130	GBIF	PRESERVED_SPECIMEN	US	1322752878	SPECIES	Theobroma	gileri		Theobroma gileri Cuatrec.	Holdridge, L.R.	5133	23/09/59	7.3233145	-76.4526667	1322752878	20/09/20
03/08/20	5139	GBIF	PRESERVED_SPECIMEN	US	1322735710	SPECIES	Theobroma	guianense		Theobroma guianense (Aubl.) J.F.Gmel.	Archer, W.A.	7820	16/11/42	-1.4378587	-48.4396158	1322735710	14/10/20
03/08/20	5140	GBIF	PRESERVED_SPECIMEN	US	1322728002	SPECIES	Herrania	cuatrecasana		Herrania cuatrecasana GarcÃ­a-Barr.	Brandbyge, J. & Asanza, E.C.	32398	29/06/80	-2.4167	-77.3333	1322728002	16/12/20
03/08/20	5142	GBIF	PRESERVED_SPECIMEN	US	1322717911	SPECIES	Theobroma	guianense		Theobroma guianense (Aubl.) J.F.Gmel.	Aulestia, M. & Andi, N.	766	26/09/93	-0.8	-76.5	1322717911	30/03/21
03/08/20	5144	GBIF	PRESERVED_SPECIMEN	US	1322715985	SPECIES	Theobroma	nemorale		Theobroma nemorale Cuatrec.	Holliday, P.C.	T147	26/06/53	4.15	-77.0667		30/10/20
03/08/20	5145	GBIF	PRESERVED_SPECIMEN	US	1322712757	SPECIES	Herrania	cuatrecasana		Herrania cuatrecasana GarcÃ­a-Barr.	Fonnegra, R.; et al.	1985	30/04/87	7.246209	-76.439543	931004532	28/04/22
03/08/20	5149	GBIF	PRESERVED_SPECIMEN	US	1322696226	SPECIES	Theobroma	guianense		Theobroma guianense (Aubl.) J.F.Gmel.	Osores, H.	107	//1995	-4.92	-78.32	1322696226	30/03/21
03/08/20	5155	GBIF	PRESERVED_SPECIMEN	US	1322678476	SPECIES	Theobroma	simiarum		Theobroma simiarum Donn.Sm.	Bello, E. & Cruz, E.	2802	24/06/91	10.3167	-84.7167		23/10/20
03/08/20	5159	GBIF	PRESERVED_SPECIMEN	US	1322664946	SPECIES	Theobroma	guianense		Theobroma guianense (Aubl.) J.F.Gmel.	Ortega, A.	17	14/08/76	-2.3333	-77	1322664946	30/03/21
03/08/20	5161	GBIF	PRESERVED_SPECIMEN	US	1322660610	SPECIES	Theobroma	guianense		Theobroma guianense (Aubl.) J.F.Gmel.	Freire, E. & Naranjo, D.	749	18/06/04	-0.6625	-76.6667	1322660610	30/03/21
03/08/20	5162	GBIF	PRESERVED_SPECIMEN	US	1322660429	SPECIES	Theobroma	guianense		Theobroma guianense (Aubl.) J.F.Gmel.	Rimachi, M.Y.	6585	18/03/83	-3.8292052	-73.3553958	1322660429	30/03/21
03/08/20	5170	GBIF	PRESERVED_SPECIMEN	US	1322620541	SPECIES	Theobroma	gileri		Theobroma gileri Cuatrec.	Palacios, W. & Tirado, M.	11233	06/09/93	0.7166667	-78.8833333	1322620541	20/09/20
03/08/20	4169	GBIF	PRESERVED_SPECIMEN	FMB	1707524341	SPECIES	Theobroma	glaucum		Theobroma glaucum H.Karst.	Barbosa, C.	5302	28/08/88	2.583333	-74.116667	1707524341	04/09/20
03/08/20	5181	GBIF	PRESERVED_SPECIMEN	US	1322561999	SPECIES	Herrania	purpurea	Theobroma purpureum Pittier	Herrania purpurea (Pittier) R.E.Schult.	Standley, P.C.	36832	06/03/24	9.9913106	-83.0415078	1322561999	08/12/20
03/08/20	5188	GBIF	PRESERVED_SPECIMEN	US	1322537567	SPECIES	Theobroma	gileri		Theobroma gileri Cuatrec.	Rios, M.	54	14/08/84	0.0833333	-79.0333333	1322537567	20/09/20
03/08/20	5195	GBIF	PRESERVED_SPECIMEN	US	1322513321	SPECIES	Theobroma	guianense		Theobroma guianense (Aubl.) J.F.Gmel.	Cid-Ferreira, C.A.; et al.	10644	08/11/91	-7.8	-72.8	1928261416	26/03/21
03/08/20	5200	GBIF	PRESERVED_SPECIMEN	US	1322506372	SPECIES	Theobroma	guianense		Theobroma guianense (Aubl.) J.F.Gmel.	Vasquez, R. & Apanu, R.	19102	08/09/94	-4.85	-78.3	1322506372	30/03/21
03/08/20	5203	GBIF	PRESERVED_SPECIMEN	US	1322500318	SPECIES	Herrania	nycterodendron		Herrania nycterodendron R.E.Schult.	Ayala, F.	1748	07/04/79	-3.822219	-73.3255442	1322500318	07/06/21
03/08/20	5204	GBIF	PRESERVED_SPECIMEN	US	1322499040	SPECIES	Theobroma	nemorale		Theobroma nemorale Cuatrec.	Faber-Langendoen, D. & Hurtado, J.	1478	25/06/88	3.98	-77.07		30/10/20
03/08/20	5210	GBIF	PRESERVED_SPECIMEN	US	1322474002	SPECIES	Theobroma	guianense		Theobroma guianense (Aubl.) J.F.Gmel.	SEF	8744	30/05/82	-0.5167	-76.3833	1322474002	30/03/21
03/08/20	5213	GBIF	PRESERVED_SPECIMEN	US	1322466541	SPECIES	Herrania	albiflora		Herrania albiflora Goudot	L.j.dorr, L.C.B.L.C. & Diaz, W.A.	7863	25/11/90	8.0092388	-70.3501796		09/11/20
03/08/20	5216	GBIF	PRESERVED_SPECIMEN	US	1322448089	SPECIES	Theobroma	obovatum		Theobroma obovatum Klotzsch ex Bernoulli	Gentry, A.H.; et al.	27877	09/11/79	-2.5575012	-73.487784	1228537888	28/09/20
03/08/20	5219	GBIF	PRESERVED_SPECIMEN	US	1322438492	SPECIES	Herrania	lemniscata		Herrania lemniscata (Schomb.) R.E.Schult.	Cruz, J.S.	3892	10/05/23	7.75	-60.25	1228206985	10/11/20
03/08/20	5220	GBIF	PRESERVED_SPECIMEN	US	1322435058	SPECIES	Theobroma	nemorale		Theobroma nemorale Cuatrec.	Holliday, P.C.	T141	26/06/53	3.9964	-76.9744		30/10/20
03/08/20	5224	GBIF	PRESERVED_SPECIMEN	US	1322407607	SPECIES	Theobroma	simiarum		Theobroma simiarum Donn.Sm.	Faber-Langendoen, D. & Hurtado, J.	1602	05/07/88	3.96666	-77.13333		23/10/20
03/08/20	5225	GBIF	PRESERVED_SPECIMEN	US	1322407128	SPECIES	Theobroma	simiarum		Theobroma simiarum Donn.Sm.	Schultes, R.E. & Cabrera, I.	18691	16/02/53	7.3233145	-76.4526667		23/10/20
03/08/20	5227	GBIF	PRESERVED_SPECIMEN	US	1322401248	SPECIES	Herrania	mariae		Herrania mariae (Mart.) Decne. ex Goudot	Mexia, Y.	7328	19/04/35	-0.7202201	-77.9342856	1322401248	04/05/21
03/08/20	4896	GBIF	PRESERVED_SPECIMEN	RB	1424167256	SPECIES	Theobroma	speciosum	Theobroma speciosa	Theobroma speciosum Willd. ex Spreng.	Bohrer, C.B.A.; et al.	71	07/10/87	-4.133333	-45.566667	1424167256	19/08/20
03/08/20	5239	GBIF	PRESERVED_SPECIMEN	US	1322369001	SPECIES	Herrania	nycterodendron		Herrania nycterodendron R.E.Schult.	Klug, G.	2069	/3/1931	-5.833333	-77.916667	1322369001	07/06/21
03/08/20	5242	GBIF	PRESERVED_SPECIMEN	US	1322357639	SPECIES	Herrania	nycterodendron		Herrania nycterodendron R.E.Schult.	Carrillo, L. & Reyes, D.	284	16/01/04	-0.3786	-76.5522	1322357639	07/06/21
03/08/20	5249	GBIF	PRESERVED_SPECIMEN	US	1322315365	SPECIES	Herrania	purpurea	Theobroma purpureum Pittier	Herrania purpurea (Pittier) R.E.Schult.	Maxon, W.R.; et al.	6804	06/06/23	9.1521	-79.84648	1322315365	09/12/20
03/08/20	5254	GBIF	PRESERVED_SPECIMEN	US	1322293894	SPECIES	Theobroma	hylaeum		Theobroma hylaeum Cuatrec.	Schultes, R.E. & Cabrera, I.	18682	16/02/53	7.3233145	-76.4526667		29/10/20
03/08/20	5259	GBIF	PRESERVED_SPECIMEN	US	1322274813	SPECIES	Theobroma	simiarum		Theobroma simiarum Donn.Sm.	Ch., G.H.	1117	04/11/87	10.9167	-85.3333		23/10/20
03/08/20	14792	GBIF	PRESERVED_SPECIMEN	COAH	768724162	SPECIES	Theobroma	obovatum		Theobroma obovatum Klotzsch ex Bernoulli	Jaramillo, R.; et al.	8050	04/06/84	-1.26	-69.72	768724162	25/09/20
03/08/20	5261	GBIF	PRESERVED_SPECIMEN	US	1322266246	SPECIES	Theobroma	guianense		Theobroma guianense (Aubl.) J.F.Gmel.	Palacios, W. & Neill, D.A.	968	25/01/86	-1.0667	-77.6167	1322266246	30/03/21
03/08/20	5263	GBIF	PRESERVED_SPECIMEN	US	1322263450	SPECIES	Herrania	nitida		Herrania nitida (Poepp.) R.E.Schult.	Grandez, C.A. & Ruiz, J.	1179	09/07/87	-5.25	-74.5	1322263450	26/04/21
03/08/20	5268	GBIF	PRESERVED_SPECIMEN	US	1322238756	SPECIES	Herrania	purpurea		Herrania purpurea (Pittier) R.E.Schult.	Hart, J.	96	/11/1885	8.9571452	-82.1440887	1322238756	09/12/20
03/08/20	5272	GBIF	PRESERVED_SPECIMEN	US	1322228900	SPECIES	Theobroma	obovatum		Theobroma obovatum Klotzsch ex Bernoulli	Vigo, J.S. & Graham, J.G.	15226	26/02/03	-8.1522	-74.2581	1322228900	05/10/20
03/08/20	5275	GBIF	PRESERVED_SPECIMEN	US	1322222201	SPECIES	Theobroma	velutinum		Theobroma velutinum Benoist	Graham, J.G. & Vigo, J.S.	4148	03/07/07	-9.1842	-75.7964		08/03/21
03/08/20	5296	GBIF	PRESERVED_SPECIMEN	US	1322145285	SPECIES	Herrania	balaensis		Herrania balaensis Preuss	Boom, B.M.	2612	07/08/83	1.25	-78.8333		12/11/20
03/08/20	5369	GBIF	PRESERVED_SPECIMEN	US	1321875643	SPECIES	Herrania	dugandii		Herrania dugandii GarcÃ­a-Barr.	Cordoba, F.	14	25/04/87	5.9425689	-76.7602089	931009393	28/04/22
03/08/20	5304	GBIF	PRESERVED_SPECIMEN	US	1322117067	SPECIES	Theobroma	guianense		Theobroma guianense (Aubl.) J.F.Gmel.	Acevedo-Rodriguez, P. & CadeÃ±o, J.A.	7431	20/06/95	-0.6808	-76.395	1322117067	30/03/21
03/08/20	5310	GBIF	PRESERVED_SPECIMEN	US	1322092929	SPECIES	Theobroma	gileri		Theobroma gileri Cuatrec.	Tipaz, G.; et al.	1247	19/06/92	1	-78.4	1322092929	21/09/20
03/08/20	14373	GBIF	PRESERVED_SPECIMEN	INPA	1042513395	SPECIES	Herrania	nitida		Herrania nitida (Poepp.) R.E.Schult.	Cid-Ferreira, C.A.; et al.	3088	02/11/80	-11.0136887	-68.7453799	1042513395	04/05/21
03/08/20	5367	GBIF	PRESERVED_SPECIMEN	US	1321879789	SPECIES	Herrania	nitida		Herrania nitida (Poepp.) R.E.Schult.	Brandbyge, J.; et al.	30481	06/04/80	-0.0833	-76.9833	1321879789	26/04/21
03/08/20	14509	GBIF	PRESERVED_SPECIMEN	HUA	931009393	SPECIES	Herrania	dugandii		Herrania dugandii GarcÃ­a-Barr.	Cordoba, F.	14	25/04/87	5.66626	-76.59855	931009393	07/06/21
03/08/20	5377	GBIF	PRESERVED_SPECIMEN	US	1321850047	SPECIES	Theobroma	guianense		Theobroma guianense (Aubl.) J.F.Gmel.	Tirado, M.; et al.	100	04/08/93	-1.4833	-77.45	1321850047	30/03/21
03/08/20	4925	GBIF	PRESERVED_SPECIMEN	RB	1424167209	SPECIES	Theobroma	speciosum		Theobroma speciosum Willd. ex Spreng.	Ducke, A.	s.n.	02/11/19	-0.1704006	-55.6749531	1424167209	20/08/20
03/08/20	5384	GBIF	PRESERVED_SPECIMEN	US	1321828521	SPECIES	Herrania	albiflora		Herrania albiflora Goudot	Cuadros, H.	2174	09/04/85	8.36717	-74.0262306		09/11/20
03/08/20	5391	GBIF	PRESERVED_SPECIMEN	US	1321809217	SPECIES	Theobroma	guianense		Theobroma guianense (Aubl.) J.F.Gmel.	Graham, J.G. & Vigo, J.S.	4382	29/07/07	-9.3553	-74.4575	1321809217	30/03/21
03/08/20	6348	GBIF	PRESERVED_SPECIMEN	US	1318333748	SPECIES	Theobroma	glaucum		Theobroma glaucum H.Karst.	McPherson, G.D.	20740	29/06/08	8.8311	-80.6847	1318333748	11/09/20
03/08/20	5400	GBIF	PRESERVED_SPECIMEN	US	1321758550	SUBSPECIES	Theobroma	glaucum		Theobroma glaucum H.Karst.	Gentry, A.H. & Cuadros,H.V.	63863	28/07/88	7.5	-76.0833333	1321758550	10/09/20
03/08/20	5402	GBIF	PRESERVED_SPECIMEN	US	1321746158	SPECIES	Theobroma	guianense		Theobroma guianense (Aubl.) J.F.Gmel.	Jansen-Jacobs, M.J.; et al.	2994	18/10/92	2	-59.25	1321746158	30/03/21
03/08/20	5403	GBIF	PRESERVED_SPECIMEN	US	1321739263	SPECIES	Theobroma	guianense		Theobroma guianense (Aubl.) J.F.Gmel.	VÃ¡squez, R.; et al.	29749	28/02/04	-10.4867	-75.0703	1321739263	30/03/21
03/08/20	5407	GBIF	PRESERVED_SPECIMEN	US	1321716561	SPECIES	Theobroma	guianense		Theobroma guianense (Aubl.) J.F.Gmel.	Zaruma, J.; et al.	204	18/05/85	1.0558059	-77.6	1321716561	30/03/21
03/08/20	6438	GBIF	PRESERVED_SPECIMEN	US	1317943711	SUBSPECIES	Theobroma	glaucum		Theobroma glaucum H.Karst.	Holliday, P.C.	145	29/06/53	3.9964	-76.9736	1317943711	11/09/20
03/08/20	5415	GBIF	PRESERVED_SPECIMEN	US	1321686210	SPECIES	Theobroma	guianense		Theobroma guianense (Aubl.) J.F.Gmel.	Graham, J.	2571	02/08/03	-7.9444	-73.8936	1321686210	31/03/21
03/08/20	5417	GBIF	PRESERVED_SPECIMEN	US	1321677582	SPECIES	Herrania	nitida		Herrania nitida (Poepp.) R.E.Schult.	Rudas, A. & Prieto, A.	3172	27/09/91	-3.7833333	-70.25	1321677582	04/05/21
03/08/20	5430	GBIF	PRESERVED_SPECIMEN	US	1321620660	SPECIES	Herrania	purpurea		Herrania purpurea (Pittier) R.E.Schult.	Sobrevilla, C. & Berry, P.	1605	03/03/86	10.4488767	-83.5069226	1321620660	12/12/20
03/08/20	5431	GBIF	PRESERVED_SPECIMEN	US	1321614711	SPECIES	Herrania	albiflora		Herrania albiflora Goudot	Bruijn, J.	1423	06/02/67	8.99999	-71.9454	2517860133	06/11/20
03/08/20	5432	GBIF	PRESERVED_SPECIMEN	US	1321607427	SPECIES	Herrania	purpurea		Herrania purpurea (Pittier) R.E.Schult.	Schultes, R.E.	5755	02/02/44	8.0951588	-76.7284559	1321607427	12/12/20
03/08/20	5441	GBIF	PRESERVED_SPECIMEN	US	1321579489	VARIETY	Herrania	nitida		Herrania nitida (Poepp.) R.E.Schult.	Killip, E.P. & Smith, A.C.	28234	26-31/8/1929	-5.9007717	-76.1129048	1321579489	26/04/21
03/08/20	5444	GBIF	PRESERVED_SPECIMEN	US	1321571159	SPECIES	Herrania	purpurea		Herrania purpurea (Pittier) R.E.Schult.	Standley, P.C. & Valerio, J.R.	48545	18/02/26	10.123244	-83.534653	1321571159	13/12/20
03/08/20	5463	GBIF	PRESERVED_SPECIMEN	US	1321497902	SPECIES	Theobroma	guianense		Theobroma guianense (Aubl.) J.F.Gmel.	Schultes, R.E. & Cabrera, I.	17842	22/10/52	1	-70.0833	1321497902	31/03/21
03/08/20	5464	GBIF	PRESERVED_SPECIMEN	US	1321497522	SPECIES	Herrania	purpurea		Herrania purpurea (Pittier) R.E.Schult.	Smith, J.D.; et al.	3334	29/12/57	9.244633	-79.646278	1321497522	12/12/20
03/08/20	5004	GBIF	PRESERVED_SPECIMEN	RB	1423905014	SPECIES	Theobroma	speciosum		Theobroma speciosum Willd. ex Spreng.	FalcÃ£o, M.J.; et al.	19	07/11/15	-4.2410076	-55.2108187	1423905014	19/08/20
03/08/20	5475	GBIF	PRESERVED_SPECIMEN	US	1321440736	SPECIES	Theobroma	simiarum		Theobroma simiarum Donn.Sm.	M. Tirado, E.A. & Chapiro, M.	268	20/09/93	0.716667	-78.883333		23/10/20
03/08/20	5005	GBIF	PRESERVED_SPECIMEN	RB	1423904965	SPECIES	Theobroma	speciosum		Theobroma speciosum Willd. ex Spreng.	FalcÃ£o, M.J.; et al.	2	04/11/15	-2.8411	-54.978	1423904965	19/08/20
03/08/20	5491	GBIF	PRESERVED_SPECIMEN	US	1321391352	SPECIES	Herrania	cuatrecasana		Herrania cuatrecasana GarcÃ­a-Barr.	Ãllgaard, B.; et al.	38832	30/05/82	-0.5167	-76.3833	1321391352	17/12/20
03/08/20	5494	GBIF	PRESERVED_SPECIMEN	US	1321370356	SPECIES	Theobroma	obovatum		Theobroma obovatum Klotzsch ex Bernoulli	Graham, J.G. & Vigo, J.S.	4383	29/07/07	-9.3556	-74.4583	1321370356	05/10/20
03/08/20	5006	GBIF	PRESERVED_SPECIMEN	RB	1423903336	SPECIES	Theobroma	speciosum		Theobroma speciosum Willd. ex Spreng.	Santos, D.	PSACF_EX06354	18/09/15	-3.263333	-51.776111		12/04/21
03/08/20	5500	GBIF	PRESERVED_SPECIMEN	US	1321345534	SPECIES	Herrania	nitida		Herrania nitida (Poepp.) R.E.Schult.	Dewalt, S.	49	19/03/95	-13.9833	-67.9833	1321345534	07/06/21
03/08/20	5504	GBIF	PRESERVED_SPECIMEN	US	1321330753	SPECIES	Herrania	lemniscata		Herrania lemniscata (Schomb.) R.E.Schult.	Williams, L.	11339	02/03/39	8.27967	-62.7468	1228603086	10/11/20
03/08/20	5007	GBIF	PRESERVED_SPECIMEN	RB	1423903330	SPECIES	Theobroma	speciosum		Theobroma speciosum Willd. ex Spreng.	Pisanelli, P.S.	PSACF_EX06336	16/09/15	-3.258333	-51.770278		12/04/21
03/08/20	5511	GBIF	PRESERVED_SPECIMEN	US	1321310516	SPECIES	Theobroma	sylvestre		Theobroma sylvestre Mart.	Ribeiro, J.E.L.S. & AssunÃ§Ã£o, P.A.C.L.	1915	22/09/97	-2.8833	-59.9667	1321310516	13/04/21
03/08/20	5513	GBIF	PRESERVED_SPECIMEN	US	1321303536	SPECIES	Herrania	nitida		Herrania nitida (Poepp.) R.E.Schult.	Schunke-Vigo, J. & Graham, J.	15422	25/03/03	-8.3189	-74.2581	1321303536	26/04/21
03/08/20	5515	GBIF	PRESERVED_SPECIMEN	US	1321296168	SPECIES	Herrania	nitida		Herrania nitida (Poepp.) R.E.Schult.	Cornejo, X.F.	7446	14/03/02	-0.1	-70.2	1321296168	26/04/21
03/08/20	5519	GBIF	PRESERVED_SPECIMEN	US	1321274986	SPECIES	Theobroma	guianense		Theobroma guianense (Aubl.) J.F.Gmel.	Rojas, R. & VÃ¡squez, R.	1352	02/09/03	-10.18	-75.15	1321274986	31/03/21
03/08/20	13037	GBIF	PRESERVED_SPECIMEN	HUA	1123913436	SPECIES	Theobroma	glaucum		Theobroma glaucum H.Karst.	RamÃ­rez, J.G. & CÃ¡rdenas, D.	1864	26/10/87	6.038224	-75.003247	1123913436	07/09/20
03/08/20	5008	GBIF	PRESERVED_SPECIMEN	RB	1423903257	SPECIES	Theobroma	speciosum		Theobroma speciosum Willd. ex Spreng.	Kotama, F. T.	s.n.	05/09/15	-3.294444	-51.848333	1423903257	23/11/20
03/08/20	5526	GBIF	PRESERVED_SPECIMEN	US	1321252637	SPECIES	Theobroma	guianense		Theobroma guianense (Aubl.) J.F.Gmel.	Clarke, H.D.; et al.	2202	14/07/96	2.07	-59.07	1321252637	31/03/21
03/08/20	5529	GBIF	PRESERVED_SPECIMEN	US	1321246153	SPECIES	Theobroma	guianense		Theobroma guianense (Aubl.) J.F.Gmel.	Pariona, W. & Pedro, I.	906	17/09/86	-10.5667	-75.4	1321246153	31/03/21
03/08/20	5530	GBIF	PRESERVED_SPECIMEN	US	1321245496	SPECIES	Herrania	nycterodendron		Herrania nycterodendron R.E.Schult.	Ceron, C.E.	1438	21/05/87	-1.0667	-77.6		07/06/21
03/08/20	5547	GBIF	PRESERVED_SPECIMEN	US	1321176450	SPECIES	Theobroma	guianense		Theobroma guianense (Aubl.) J.F.Gmel.	Sothers, C.A. & Silva, C.F.	414	25/04/95	-2.8833	-59.9667	1321176450	26/11/20
03/08/20	5556	GBIF	PRESERVED_SPECIMEN	US	1321128333	SPECIES	Theobroma	gileri		Theobroma gileri Cuatrec.	Barfod, A.S.; et al.	48430	19/10/83	0.8	-78.9	1321128333	21/09/20
03/08/20	5572	GBIF	PRESERVED_SPECIMEN	US	1321054734	VARIETY	Theobroma	chocoense		Theobroma chocoense var. bullatum Cuatrec.	PatiÃ±o, V.M.	171B	15/02/55	5.7096	-77.2841	1319178887	22/10/20
03/08/20	5576	GBIF	PRESERVED_SPECIMEN	US	1321049141	SPECIES	Theobroma	guianense		Theobroma guianense (Aubl.) J.F.Gmel.	Silva, A.	317	01/07/44	-1.4301853	-48.4568647	1265518227	01/04/21
03/08/20	11654	GBIF	PRESERVED_SPECIMEN	MO	1258383215	SPECIES	Theobroma	velutinum		Theobroma velutinum Benoist	Mori, S.A.; et al.	15098	17/10/82	3.61666	-53.2	694272928	06/08/20
03/08/20	5582	GBIF	PRESERVED_SPECIMEN	US	1321023518	SPECIES	Herrania	purpurea		Herrania purpurea (Pittier) R.E.Schult.	Peterson, P.M. & Annable, C.R.	7011	22/02/89	9.1710373	-82.2487464	1321023518	12/12/20
03/08/20	5584	GBIF	PRESERVED_SPECIMEN	US	1321012742	SPECIES	Theobroma	guianense		Theobroma guianense (Aubl.) J.F.Gmel.	Cornejo, X.F.	7483	15/03/02	-0.03	-70.15	1321012742	01/04/21
03/08/20	6479	GBIF	PRESERVED_SPECIMEN	US	1317818004	SUBSPECIES	Theobroma	glaucum		Theobroma glaucum H.Karst.	Holliday, P.C.	142	29/06/53	3.9964	-76.9744	1317818004	11/09/20
03/08/20	5593	GBIF	PRESERVED_SPECIMEN	US	1320995009	SPECIES	Herrania	mariae		Herrania mariae (Mart.) Decne. ex Goudot	McDaniel, S.T. & Rimachi, M.	16962	11/03/73	-2.5575012	-73.3885101	1320995009	05/05/21
03/08/20	5597	GBIF	PRESERVED_SPECIMEN	US	1320973615	SPECIES	Theobroma	guianense		Theobroma guianense (Aubl.) J.F.Gmel.	Clarke, H.D.	4451	10/05/97	1.98	-59.2	1320973615	01/04/21
03/08/20	5600	GBIF	PRESERVED_SPECIMEN	US	1320965725	SPECIES	Theobroma	simiarum		Theobroma simiarum Donn.Sm.	Smith, J.D.	6457	/2/1896	10.247	-83.7854	1320965725	23/10/20
03/08/20	5601	GBIF	PRESERVED_SPECIMEN	US	1320960080	SPECIES	Herrania	nitida		Herrania nitida (Poepp.) R.E.Schult.	Killip, E.P. & Smith, A.C.	27431	03/08/29	-3.762236	-73.261837	1320960080	26/04/21
03/08/20	5604	GBIF	PRESERVED_SPECIMEN	US	1320938138	SPECIES	Theobroma	guianense		Theobroma guianense (Aubl.) J.F.Gmel.	GonzÃ¡les, E. & Perea, J.	1174	07/03/06	-9.9083	-75.4583	1320938138	31/03/21
03/08/20	5605	GBIF	PRESERVED_SPECIMEN	US	1320937861	SPECIES	Theobroma	gileri		Theobroma gileri Cuatrec.	MÃ©ndez, P.; et al.	55	20/02/93	0.7166667	-78.9166667	1320937861	21/09/20
03/08/20	5606	GBIF	PRESERVED_SPECIMEN	US	1320927344	SPECIES	Herrania	lemniscata		Herrania lemniscata (Schomb.) R.E.Schult.	Fernandez, A.	3913	/2/1987	8.47	-60.45		10/11/20
03/08/20	5609	GBIF	PRESERVED_SPECIMEN	US	1320898304	SPECIES	Theobroma	guianense		Theobroma guianense (Aubl.) J.F.Gmel.	Acevedo-Rodriguez, P.; et al.	4807	22/04/92	4.5146584	-52.0665743	1320898304	31/03/21
03/08/20	5616	GBIF	PRESERVED_SPECIMEN	US	1320865415	VARIETY	Herrania	mariae		Herrania mariae (Mart.) Decne. ex Goudot	Asplund, E.	18720	07/12/55	-1.5881406	-78.0148746	1258454888	05/05/21
03/08/20	5625	GBIF	PRESERVED_SPECIMEN	US	1320840163	SPECIES	Herrania	mariae		Herrania mariae (Mart.) Decne. ex Goudot	Graham, J. & Vigo, J.S.	1620	06/07/02	-10.0666667	-71.1	1320840163	04/05/21
03/08/20	5634	GBIF	PRESERVED_SPECIMEN	US	1320798138	SPECIES	Theobroma	guianense		Theobroma guianense (Aubl.) J.F.Gmel.	Dik, A. & Andi, J.	894	23/01/94	-0.8333	-76.35	1320798138	31/03/21
03/08/20	5639	GBIF	PRESERVED_SPECIMEN	US	1320786243	SPECIES	Herrania	nitida		Herrania nitida (Poepp.) R.E.Schult.	Cuatrecasas, J.	26663	08/11/62	-1.436226	-48.449192	1320786243	07/05/21
03/08/20	5641	GBIF	PRESERVED_SPECIMEN	US	1320783692	SPECIES	Herrania	balaensis		Herrania balaensis Preuss	Cornejo, X.F. & Bonitaz, C.	7730	26/04/03	0.38	-79.43		12/11/20
03/08/20	5647	GBIF	PRESERVED_SPECIMEN	US	1320755505	SPECIES	Theobroma	guianense		Theobroma guianense (Aubl.) J.F.Gmel.	Granville, J.J. & Cremers, G.	12773	05/02/95	4.85	-53.0667	1320755505	31/03/21
03/08/20	5650	GBIF	PRESERVED_SPECIMEN	US	1320750411	SPECIES	Theobroma	cirmolinae		Theobroma cirmolinae Cuatrec.	Cuatrecasas, J.	14897	19/08/43	4.7122	-75.8653	1320750411	20/10/20
03/08/20	5652	GBIF	PRESERVED_SPECIMEN	US	1320740631	SPECIES	Herrania	nitida		Herrania nitida (Poepp.) R.E.Schult.	Cavalcante, P.B.	347	11/02/58	-1.4521793	-48.4771464	1320740631	04/05/21
03/08/20	5657	GBIF	PRESERVED_SPECIMEN	US	1320731420	SPECIES	Herrania	nitida		Herrania nitida (Poepp.) R.E.Schult.	Betancur, J.C.; et al.	2280	01/12/90	2.1136446	-74.7732056	1320731420	27/04/21
03/08/20	5664	GBIF	PRESERVED_SPECIMEN	US	1320714777	SPECIES	Theobroma	guianense		Theobroma guianense (Aubl.) J.F.Gmel.	Freire, E. & Santi, L.	3338	03/09/98	-1.45	-77.6	1320714777	31/03/21
03/08/20	5675	GBIF	PRESERVED_SPECIMEN	US	1320677621	SPECIES	Herrania	purpurea		Herrania purpurea (Pittier) R.E.Schult.	Folsom, J.P.	8867	10/02/81	9.9981413	-84.1197643	1320677621	13/12/20
03/08/20	5677	GBIF	PRESERVED_SPECIMEN	US	1320668622	SPECIES	Herrania	cuatrecasana		Herrania cuatrecasana GarcÃ­a-Barr.	Cuatrecasas, J. & Cope, F.W.	25793	01/12/73	10.7407451	-61.5552137	1320668622	17/12/20
03/08/20	5680	GBIF	PRESERVED_SPECIMEN	US	1320654972	SPECIES	Theobroma	guianense		Theobroma guianense (Aubl.) J.F.Gmel.	Clarke, H.D. & McPherson, T.	2013	06/06/96	3.33	-59.25	1320654972	05/01/21
03/08/20	5686	GBIF	PRESERVED_SPECIMEN	US	1320640794	SUBSPECIES	Theobroma	glaucum		Theobroma glaucum H.Karst.	Holliday, P.C.	T178	04/08/53	5.5031	-76.5303	1320640794	10/09/20
03/08/20	5700	GBIF	PRESERVED_SPECIMEN	US	1320590724	SPECIES	Theobroma	microcarpum		Theobroma microcarpum Mart.	Baker, R.E.D. & Cope, F.W.	T29	07/10/52	-1.4769786	-70.9080774	1317362263	17/09/20
03/08/20	5707	GBIF	PRESERVED_SPECIMEN	US	1320574161	SPECIES	Theobroma	hylaeum		Theobroma hylaeum Cuatrec.	Araque-Molina, J. & Barkley, F.A.	18C745	14/08/48	7.3555	-76.4927	1320574161	29/10/20
03/08/20	5708	GBIF	PRESERVED_SPECIMEN	US	1320572786	SPECIES	Theobroma	guianense		Theobroma guianense (Aubl.) J.F.Gmel.	Little, E.L.; et al.	520	01/10/75	-2.8667	-77.6833	1320572786	31/03/21
03/08/20	5721	GBIF	PRESERVED_SPECIMEN	US	1320510075	SPECIES	Herrania	cuatrecasana		Herrania cuatrecasana GarcÃ­a-Barr.	Brandbyge, J. & E. Asanza, C.	32781	13/08/80	-0.25	-76.35		17/12/20
03/08/20	5730	GBIF	PRESERVED_SPECIMEN	US	1320470286	SPECIES	Herrania	lemniscata		Herrania lemniscata (Schomb.) R.E.Schult.	W. Hahn, E.J.J. & Gopaul, D.	4225	04/04/88	4.9	-59.8167		10/11/20
03/08/20	5381	GBIF	PRESERVED_SPECIMEN	US	1321832084	SPECIES	Theobroma	speciosum		Theobroma speciosum Willd. ex Spreng.	R. L. FrÃ³es	29	19/10/46	-7.0636532	-70.2792599	1321832084	19/08/20
03/08/20	5745	GBIF	PRESERVED_SPECIMEN	US	1320412063	SPECIES	Theobroma	guianense		Theobroma guianense (Aubl.) J.F.Gmel.	Pariona, W. & Pedro, I.	909	17/09/86	-10.2701573	-75.1334008	1320412063	31/03/21
03/08/20	5746	GBIF	PRESERVED_SPECIMEN	US	1320408512	SPECIES	Theobroma	guianense		Theobroma guianense (Aubl.) J.F.Gmel.	Aulestia, M.; et al.	1506	01/12/93	-0.8167	-76.3667	1320408512	31/03/21
03/08/20	5755	GBIF	PRESERVED_SPECIMEN	US	1320383846	SPECIES	Herrania	nitida		Herrania nitida (Poepp.) R.E.Schult.	Schultes, R.E.; et al.	18553	19/11/52	1.25	-70.0833	1320383846	27/04/21
03/08/20	5757	GBIF	PRESERVED_SPECIMEN	US	1320381008	SPECIES	Theobroma	guianense		Theobroma guianense (Aubl.) J.F.Gmel.	Clarke, H.D.	4821	21/05/97	1.83	-59.08	1320381008	31/03/21
03/08/20	5762	GBIF	PRESERVED_SPECIMEN	US	1320361827	SPECIES	Theobroma	guianense		Theobroma guianense (Aubl.) J.F.Gmel.	Romoleroux, J. & Foster, R.	1974	07/11/95	-0.6333	-76.5	1320361827	31/03/21
03/08/20	15456	GBIF	PRESERVED_SPECIMEN	AAU	47781163	SPECIES	Herrania	cuatrecasana		Herrania cuatrecasana GarcÃ­a-Barr.	Jaramillo, J.	s.n.	30/05/80	-1.633	-75.966		17/12/20
03/08/20	5770	GBIF	PRESERVED_SPECIMEN	US	1320328547	SPECIES	Theobroma	canumanense		Theobroma canumanense Pires & Froes ex Cuatrec.	FrÃ³es, R.L.	33783	05/11/57	-4.391825	-59.5878796	1320328547	19/10/20
03/08/20	6197	GBIF	PRESERVED_SPECIMEN	US	1318910218	SPECIES	Theobroma	guianense		Theobroma guianense (Aubl.) J.F.Gmel.	VÃ¡squez, R. & Jaramillo, N.	4922	30/04/84	-3.8	-73.4167	1318910218	01/04/21
03/08/20	5783	GBIF	PRESERVED_SPECIMEN	US	1320298955	SPECIES	Theobroma	guianense		Theobroma guianense (Aubl.) J.F.Gmel.	VÃ¡squez, R.; et al.	29881	02/03/04	-10.3881	-75.0739	1320298955	31/03/21
03/08/20	5800	GBIF	PRESERVED_SPECIMEN	US	1320233797	SPECIES	Theobroma	gileri		Theobroma gileri Cuatrec.	BonitÃ¡z, C. & Cornejo, X.F.	3844	11/09/98	0.35	-78.57	1320233797	21/09/20
03/08/20	5813	GBIF	PRESERVED_SPECIMEN	US	1320186302	SPECIES	Theobroma	simiarum		Theobroma simiarum Donn.Sm.	Gentry, A.H. & Ortiz, R.C.	78548	05/01/93	10.4333	-84.0167		23/10/20
03/08/20	5815	GBIF	PRESERVED_SPECIMEN	US	1320173480	SPECIES	Theobroma	guianense		Theobroma guianense (Aubl.) J.F.Gmel.	Graham, J.G.	5121	23/10/09	-9.4606	-74.5503	1320173480	31/03/21
03/08/20	5818	GBIF	PRESERVED_SPECIMEN	US	1320167816	SPECIES	Theobroma	guianense		Theobroma guianense (Aubl.) J.F.Gmel.	Wilson, B.	s.n.	09/04/57	-2.883333	-59.97	1320167816	31/03/21
03/08/20	14774	GBIF	PRESERVED_SPECIMEN	COAH	768727905	SPECIES	Theobroma	glaucum		Theobroma glaucum H.Karst.	Henao, C.I.	356	26/08/88	-1.53	-72.71	768727905	07/09/20
03/08/20	5821	GBIF	PRESERVED_SPECIMEN	US	1320148912	SPECIES	Theobroma	sinuosum		Theobroma sinuosum Pav. ex Huber	Palacios, W.A.; et al.	8484	20/10/91	-4.2667	-78.7	1259201907	19/10/20
03/08/20	5822	GBIF	PRESERVED_SPECIMEN	US	1320135683	VARIETY	Herrania	nitida		Herrania nitida var. aspera (G.Karsten & Triana ex Triana) R.Schult.	Schultes, R.E.	6304	/9/1945	0	0	1320135683	17/05/21
03/08/20	5828	GBIF	PRESERVED_SPECIMEN	US	1320101114	SPECIES	Herrania	albiflora		Herrania albiflora Goudot	Liesner, R.L. & Gonzalez, A.	13164	24/03/82	9.6	-72.9		09/11/20
03/08/20	5836	GBIF	PRESERVED_SPECIMEN	US	1320064712	SPECIES	Theobroma	speciosum		Theobroma speciosum Willd. ex Spreng.	Daly, D.C.; et al.	12181	05/10/03	-9.9556	-66.7639		14/08/20
03/08/20	5845	GBIF	PRESERVED_SPECIMEN	US	1320033485	SPECIES	Theobroma	guianense		Theobroma guianense (Aubl.) J.F.Gmel.	Aulestia, M.; et al.	978	26/10/93	-0.8	-76.3833	1320033485	31/03/21
03/08/20	5846	GBIF	PRESERVED_SPECIMEN	US	1320025854	SPECIES	Theobroma	guianense		Theobroma guianense (Aubl.) J.F.Gmel.	C. Kajekai & et al.	227	22/10/05	-3.0086	-78.08	1320025854	31/03/21
03/08/20	5861	GBIF	PRESERVED_SPECIMEN	US	1319969450	SPECIES	Theobroma	hylaeum		Theobroma hylaeum Cuatrec.	Holliday, P.C. & Bartley, B.	T166	24/08/53	7.33	-76.43	1319969450	29/10/20
03/08/20	5862	GBIF	PRESERVED_SPECIMEN	US	1319969263	SPECIES	Theobroma	obovatum		Theobroma obovatum Klotzsch ex Bernoulli	T. Henkel, M.C.W. & James, R.	4913	02/03/94	-1.2833333	-58.65	1317908183	05/10/20
03/08/20	5863	GBIF	PRESERVED_SPECIMEN	US	1319968242	SPECIES	Theobroma	nemorale		Theobroma nemorale Cuatrec.	Cuatrecasas, J.	17738	17/05/44	4.3985	-75.9227	1228494400	30/10/20
03/08/20	5865	GBIF	PRESERVED_SPECIMEN	US	1319960780	SPECIES	Theobroma	obovatum		Theobroma obovatum Klotzsch ex Bernoulli	Daly, D.C.; et al.	13161	04/07/08	-9.4094	-68.6017	1319960780	05/10/20
03/08/20	5882	GBIF	PRESERVED_SPECIMEN	US	1319919744	SPECIES	Herrania	purpurea		Herrania purpurea (Pittier) R.E.Schult.	Cooper, G.P. & Slater, G.	283	//1927	8.4297819	-82.8317486	1319919744	12/12/20
03/08/20	5886	GBIF	PRESERVED_SPECIMEN	US	1319907111	SPECIES	Theobroma	simiarum		Theobroma simiarum Donn.Sm.	PatiÃ±o, V.M.	171B	15/02/55	5.7096	-77.2841	1319178887	23/10/20
03/08/20	5896	GBIF	PRESERVED_SPECIMEN	US	1319888822	SPECIES	Herrania	cuatrecasana		Herrania cuatrecasana GarcÃ­a-Barr.	J.l.clark, W.Q.T. & Katan, T.	6910	11/12/02	-3.2328	-78.2531		17/12/20
03/08/20	5912	GBIF	PRESERVED_SPECIMEN	US	1319836779	SPECIES	Theobroma	obovatum		Theobroma obovatum Klotzsch ex Bernoulli	Graham, J.G. & Vigo, J.S.	4334	25/07/07	-9.3839	-74.4939	1319836779	05/10/20
03/08/20	5915	GBIF	PRESERVED_SPECIMEN	US	1319823666	SPECIES	Herrania	balaensis		Herrania balaensis Preuss	Ortiz, A.	30	31/10/94	1.25	-78.67		12/11/20
03/08/20	5918	GBIF	PRESERVED_SPECIMEN	US	1319816289	VARIETY	Herrania	mariae		Herrania mariae var. putumayonis R.E.Schult.	Asplund, E.	9428	18/10/39	-0.9811572	-77.790671	1319816289	05/05/21
03/08/20	5928	GBIF	PRESERVED_SPECIMEN	US	1319786293	VARIETY	Herrania	nitida		Herrania nitida var. sphenophylla R.E.Schult.	Klug, G.	604	/10/1929	-5.8967563	-76.1029554	1319786293	17/05/21
03/08/20	5936	GBIF	PRESERVED_SPECIMEN	US	1319768674	SPECIES	Theobroma	nemorale		Theobroma nemorale Cuatrec.	Barbosa, C.E.	6621	17/05/90	6.0833	-77.1667	1707532940	30/10/20
03/08/20	5949	GBIF	PRESERVED_SPECIMEN	US	1319734557	VARIETY	Herrania	pulcherrima		Herrania pulcherrima var. pacifica R.E.Schult.	Schultes, R.E. & Cabrera, I.	18707	16/02/53	7.2440551	-76.436769	1319734557	14/12/20
03/08/20	5952	GBIF	PRESERVED_SPECIMEN	US	1319733691	SUBSPECIES	Theobroma	glaucum		Theobroma glaucum H.Karst.	Holliday, P.C.	T172	01/08/53	1.2667	-73.63	1319733691	11/09/20
03/08/20	5957	GBIF	PRESERVED_SPECIMEN	US	1319715791	SPECIES	Theobroma	guianense		Theobroma guianense (Aubl.) J.F.Gmel.	Vargas, H. & Alvarado, A.	1066	//	-0.2	-77.28	1319715791	31/03/21
03/08/20	5958	GBIF	PRESERVED_SPECIMEN	US	1319708630	SPECIES	Herrania	purpurea		Herrania purpurea (Pittier) R.E.Schult.	Standley, P.C.	27434	19/12/23	9.176073	-79.7985659	1319708630	13/12/20
03/08/20	5963	GBIF	PRESERVED_SPECIMEN	US	1319699627	SPECIES	Herrania	nitida		Herrania nitida (Poepp.) R.E.Schult.	Schultes, R.E. & Cabrera, I.	19665	/11/1951	0.75	-70.5	1319699627	01/06/21
03/08/20	5971	GBIF	PRESERVED_SPECIMEN	US	1319675960	SPECIES	Theobroma	guianense		Theobroma guianense (Aubl.) J.F.Gmel.	Vigo, J.S. & Graham, J.	16075	25/09/04	-8.93	-75.63	1319675960	01/04/21
03/08/20	5976	GBIF	PRESERVED_SPECIMEN	US	1319663121	SPECIES	Herrania	purpurea		Herrania purpurea (Pittier) R.E.Schult.	Dunlap, V.C.	448	22/02/24	9.4488704	-82.485187	1319663121	12/12/20
03/08/20	5992	GBIF	PRESERVED_SPECIMEN	US	1319607331	SPECIES	Herrania	purpurea		Herrania purpurea (Pittier) R.E.Schult.	Nee, M.	9396	18/01/74	9.0833333	-79.65	1319607331	13/12/20
03/08/20	13032	GBIF	PRESERVED_SPECIMEN	HUA	1123914216	SPECIES	Theobroma	glaucum		Theobroma glaucum H.Karst.	RamÃ­rez, J.G. & CÃ¡rdenas, D.	1144	26/06/87	6	-74.000183	1898883281	04/09/20
03/08/20	6006	GBIF	PRESERVED_SPECIMEN	US	1319571511	SPECIES	Herrania	nitida		Herrania nitida (Poepp.) R.E.Schult.	Rimachi, M.Y.	8560	06/04/88	-3.497729	-73.4306686	1319571511	01/06/21
03/08/20	14794	GBIF	PRESERVED_SPECIMEN	COAH	768723999	SPECIES	Theobroma	guianense		Theobroma guianense (Aubl.) J.F.Gmel.	Jaramillo, R.; et al.	7962	30/03/84	-0.59	-72.37	768723999	28/12/20
03/08/20	6010	GBIF	PRESERVED_SPECIMEN	US	1319557907	VARIETY	Herrania	nitida		Herrania nitida var. sphenophylla R.E.Schult.	Schultes, R.E. & Black, G.A.	8377	/9/1946	0	0	1319557907	01/06/21
03/08/20	6017	GBIF	PRESERVED_SPECIMEN	US	1319537382	SPECIES	Theobroma	gileri		Theobroma gileri Cuatrec.	Baker, R.E.D. & Cope, F.W.	T28	10/05/52	-1.4769786	-70.9080774	1319537382	17/09/20
03/08/20	6030	GBIF	PRESERVED_SPECIMEN	US	1319495608	SPECIES	Theobroma	guianense		Theobroma guianense (Aubl.) J.F.Gmel.	Schultes, R.E.; et al.	18552	19/11/52	1.25	-70.0833	1319495608	01/04/21
03/08/20	6041	GBIF	PRESERVED_SPECIMEN	US	1319470289	SPECIES	Theobroma	nemorale		Theobroma nemorale Cuatrec.	Holliday, P.C.	T173	02/08/53	5.1589	-76.6917		30/10/20
03/08/20	6047	GBIF	PRESERVED_SPECIMEN	US	1319454563	SPECIES	Herrania	purpurea		Herrania purpurea (Pittier) R.E.Schult.	Schultes, R.E. & Cabrera, I.	18693	16/02/53	7.355584	-76.490572	1319454563	13/12/20
03/08/20	3378	GBIF	PRESERVED_SPECIMEN	COL	1898883281	SPECIES	Theobroma	glaucum		Theobroma glaucum H.Karst.	RamÃ­rez, J.G. & CÃ¡rdenas, D.	1144	26/06/87	6	-74.783333	1898883281	04/09/20
03/08/20	6058	GBIF	PRESERVED_SPECIMEN	US	1319389880	SPECIES	Theobroma	guianense		Theobroma guianense (Aubl.) J.F.Gmel.	Dik, A.	860	06/12/93	-0.8333	-76.3667	1319389880	01/04/21
03/08/20	6060	GBIF	PRESERVED_SPECIMEN	US	1319383187	SPECIES	Herrania	purpurea		Herrania purpurea (Pittier) R.E.Schult.	Peterson, P.M.	6407	29/01/89	9.4047951	-82.269193	1319383187	12/12/20
03/08/20	6075	GBIF	PRESERVED_SPECIMEN	US	1319319566	SPECIES	Theobroma	obovatum		Theobroma obovatum Klotzsch ex Bernoulli	Graham, J.G. & Vigo, J.S.	4480	02/08/07	-9.3422	-74.5072	1319319566	05/10/20
03/08/20	6077	GBIF	PRESERVED_SPECIMEN	US	1319316107	SPECIES	Theobroma	guianense		Theobroma guianense (Aubl.) J.F.Gmel.	Vasquez, R. & Ruiz, J.	2935	18/03/82	-3.83	-73.58		01/04/21
03/08/20	6091	GBIF	PRESERVED_SPECIMEN	US	1319265818	SPECIES	Theobroma	obovatum		Theobroma obovatum Klotzsch ex Bernoulli	Graham, J.G. & Vigo, J.S.	4374	29/07/07	-9.3602778	-74.4497222	1319265818	05/10/20
03/08/20	5792	GBIF	PRESERVED_SPECIMEN	US	1320252499	SPECIES	Theobroma	speciosum		Theobroma speciosum Willd. ex Spreng.	Pires, J.M. & Pires, R.P.B.	12902	/8/1970	-5.5167	-50.2167	1320252499	12/04/21
03/08/20	6106	GBIF	PRESERVED_SPECIMEN	US	1319227657	HYBRID	Theobroma	sylvestre		Theobroma sylvestre x subincanum	Pires, J.M.; et al.	4345	06/11/52	0	0	1042589844	13/04/21
03/08/20	6116	GBIF	PRESERVED_SPECIMEN	US	1319187212	SPECIES	Theobroma	guianense		Theobroma guianense (Aubl.) J.F.Gmel.	Vega, I.M.S. & Dillon, M.O.	8418	01/11/96	-5.9	-77.35	1319187212	01/04/21
03/08/20	6128	GBIF	PRESERVED_SPECIMEN	US	1319141425	SPECIES	Theobroma	guianense		Theobroma guianense (Aubl.) J.F.Gmel.	Vega, I.M.S & Dillon, M.O.	8122	18/07/95	-5.8646091	-77.4611418	1319141425	01/04/21
03/08/20	3484	GBIF	PRESERVED_SPECIMEN	ENCB	1896043328	SPECIES	Herrania	nitida		Herrania nitida (Poepp.) R.E.Schult.	Jaramillo, R.	s.n.	28/05/84	-1.258333	-69.91		22/04/21
03/08/20	6147	GBIF	PRESERVED_SPECIMEN	US	1319092621	SPECIES	Theobroma	guianense		Theobroma guianense (Aubl.) J.F.Gmel.	Larpin, D.	908	01/04/90	4.05	-52.7	1319092621	23/12/20
03/08/20	6151	GBIF	PRESERVED_SPECIMEN	US	1319067876	SPECIES	Theobroma	gileri		Theobroma gileri Cuatrec.	YÃ¡nez, A.; et al.	1521	10/09/93	0.7333333	-78.9	1319067876	21/09/20
03/08/20	6155	GBIF	PRESERVED_SPECIMEN	US	1319058263	SPECIES	Theobroma	obovatum		Theobroma obovatum Klotzsch ex Bernoulli	Graham, J.G. & Vigo, J.S.	4386	29/07/07	-9.3553	-74.46	1319058263	12/04/21
03/08/20	13073	GBIF	PRESERVED_SPECIMEN	HUA	1123899011	SPECIES	Theobroma	glaucum		Theobroma glaucum H.Karst.	David, H.; et al.	3507	26/03/11	6.218889	-74.859722		07/09/20
03/08/20	6175	GBIF	PRESERVED_SPECIMEN	US	1318984829	SPECIES	Theobroma	guianense		Theobroma guianense (Aubl.) J.F.Gmel.	SÃ¡nchez, P.; et al.	5	18/03/88	1.9189532	-67.0553953	1318984829	01/04/21
03/08/20	6181	GBIF	PRESERVED_SPECIMEN	US	1318966900	SPECIES	Herrania	mariae		Herrania mariae (Mart.) Decne. ex Goudot	Schultes, R.E.	8067	15/07/46	-1.4521793	-48.4771464	1318966900	05/05/21
03/08/20	6183	GBIF	PRESERVED_SPECIMEN	US	1318952477	SPECIES	Theobroma	guianense		Theobroma guianense (Aubl.) J.F.Gmel.	J. S. Miller, M. Waite & Huepe Coba. MÃ©ngatue	111	10/10/91	-1.02	-77.1647	1318952477	01/04/21
03/08/20	6195	GBIF	PRESERVED_SPECIMEN	US	1318912438	SPECIES	Theobroma	gileri		Theobroma gileri Cuatrec.	Clark, J.L.; et al.	4987	11/04/98	0.2166667	-78.9166667	1318912438	21/09/20
03/08/20	14793	GBIF	PRESERVED_SPECIMEN	COAH	768724130	SPECIES	Herrania	nitida		Herrania nitida (Poepp.) R.E.Schult.	Jaramillo, R. & Palacios, P.	7957	28/05/84	-1.08	-71.08	768724130	07/04/21
03/08/20	6207	GBIF	PRESERVED_SPECIMEN	US	1318871576	SPECIES	Theobroma	guianense		Theobroma guianense (Aubl.) J.F.Gmel.	Evans, R. & Koemar, S.	3424	03/06/03	3.0875	-56.4639	1318871576	01/04/21
03/08/20	6209	GBIF	PRESERVED_SPECIMEN	US	1318866149	SPECIES	Theobroma	guianense		Theobroma guianense (Aubl.) J.F.Gmel.	Jansen-Jacobs, M.J.; et al.	1499	06/09/89	1.65	-58.6333	1265518253	01/04/21
03/08/20	6224	GBIF	PRESERVED_SPECIMEN	US	1318821190	SPECIES	Theobroma	guianense		Theobroma guianense (Aubl.) J.F.Gmel.	Dik, A.	260	05/09/93	-0.75	-76.5	1318821190	01/04/21
03/08/20	6233	GBIF	PRESERVED_SPECIMEN	US	1318784934	SPECIES	Herrania	balaensis		Herrania balaensis Preuss	J.l.clark, K.C. & Roberts, C.	1672	25/11/95	0.35	-79.7333		12/11/20
03/08/20	6235	GBIF	PRESERVED_SPECIMEN	US	1318774474	SPECIES	Herrania	nitida		Herrania nitida (Poepp.) R.E.Schult.	EncarnaciÃ³n, F.	26219	26/08/82	-73.8507279	-5.0641652	1318774474	01/06/21
03/08/20	6259	GBIF	PRESERVED_SPECIMEN	US	1318683611	SPECIES	Herrania	balaensis		Herrania balaensis Preuss	Eggers, H.F.A.	14362	/4/1892	-2.9167	-79.8167		12/11/20
03/08/20	6268	GBIF	PRESERVED_SPECIMEN	US	1318670846	SPECIES	Theobroma	obovatum		Theobroma obovatum Klotzsch ex Bernoulli	Graham, J.G. & Vigo, J.S.	4390	29/07/07	-9.3558333	-74.4638889	1318670846	05/10/20
03/08/20	6274	GBIF	PRESERVED_SPECIMEN	US	1318645824	SPECIES	Theobroma	guianense		Theobroma guianense (Aubl.) J.F.Gmel.	Mori, S.A. & Moonen, J.	25650	05/11/03	4.6	-52.3	1318645824	01/04/21
03/08/20	6276	GBIF	PRESERVED_SPECIMEN	US	1318639371	SPECIES	Theobroma	guianense		Theobroma guianense (Aubl.) J.F.Gmel.	Asplund, E.	12911	08/08/40	-9.2976466	-76.0000202	1318639371	01/04/21
03/08/20	6278	GBIF	PRESERVED_SPECIMEN	US	1318633854	SPECIES	Theobroma	guianense		Theobroma guianense (Aubl.) J.F.Gmel.	Irwin, H.S.; et al.	54894	19/08/63	3.6416667	-56.5333333	1318633854	01/04/21
03/08/20	6282	GBIF	PRESERVED_SPECIMEN	US	1318620031	SPECIES	Theobroma	guianense		Theobroma guianense (Aubl.) J.F.Gmel.	Freire, E. & Vergara, A.	3094	13/03/98	-0.0333	-77.1833	1318620031	01/04/21
03/08/20	6285	GBIF	PRESERVED_SPECIMEN	US	1318599347	SPECIES	Theobroma	guianense		Theobroma guianense (Aubl.) J.F.Gmel.	Rojas, R. & Ortiz, G.	4258	02/07/07	-10.1042	-75.5503	1318599347	01/04/21
03/08/20	6291	GBIF	PRESERVED_SPECIMEN	US	1318570448	SPECIES	Herrania	cuatrecasana		Herrania cuatrecasana GarcÃ­a-Barr.	J.c.betancur, B.E.J.K. & Roesel, C.S.	2845	29/09/91	-3.8	-70.4		28/04/22
03/08/20	4194	GBIF	PRESERVED_SPECIMEN	FMB	1707515575	SPECIES	Theobroma	glaucum		Theobroma glaucum H.Karst.	Rudas, A.; et al.	3744	26/03/92	-3.7	-70.25	1707515575	05/03/21
03/08/20	6316	GBIF	PRESERVED_SPECIMEN	US	1318479893	SPECIES	Theobroma	obovatum		Theobroma obovatum Klotzsch ex Bernoulli	Dionizia, F.; et al.	60	07/08/87	-8.7517	-63.4547	1928200116	12/04/21
03/08/20	6324	GBIF	PRESERVED_SPECIMEN	US	1318456059	SPECIES	Theobroma	guianense		Theobroma guianense (Aubl.) J.F.Gmel.	Fiaschi, P.; et al.	3282	21/08/08	-7.4465	-73.6576	1928434701	20/11/20
03/08/20	6337	GBIF	PRESERVED_SPECIMEN	US	1318406677	SPECIES	Theobroma	mammosum		Theobroma mammosum Cuatrec. & J.LeÃ³n	Bello, E.	1290	26/09/89	10.35	-84.6667		02/11/20
03/08/20	6353	GBIF	PRESERVED_SPECIMEN	US	1318311782	SPECIES	Theobroma	sylvestre		Theobroma sylvestre Mart.	FrÃ³es, R.L.	20463	/2/1945	-2.516085	-66.0925092	1318311782	13/04/21
03/08/20	5564	GBIF	PRESERVED_SPECIMEN	US	1321094876	SPECIES	Theobroma	obovatum		Theobroma obovatum Klotzsch ex Bernoulli	VÃ¡squez, R. & Jaramillo, N.	8887	28/02/87	-3.75	-73.35	1321094876	05/10/20
03/08/20	6355	GBIF	PRESERVED_SPECIMEN	US	1318296787	SPECIES	Theobroma	guianense		Theobroma guianense (Aubl.) J.F.Gmel.	VÃ¡squez, R.	2867	12/01/82	-3.75	-73.25	1318296787	02/04/21
03/08/20	6360	GBIF	PRESERVED_SPECIMEN	US	1318269556	SUBSPECIES	Theobroma	glaucum		Theobroma glaucum H.Karst.	McPherson, G.D.	8558	05/03/86	8.9166667	-82.1666667	1318122377	14/09/20
03/08/20	6377	GBIF	PRESERVED_SPECIMEN	US	1318180634	SPECIES	Herrania	nitida		Herrania nitida (Poepp.) R.E.Schult.	Vigo, J.S.	4704	05/02/71	-7.2785279	-77.1697852	1318180634	01/06/21
03/08/20	6391	GBIF	PRESERVED_SPECIMEN	US	1318132676	SPECIES	Herrania	cuatrecasana		Herrania cuatrecasana GarcÃ­a-Barr.	Brandbyge, J. & E. Asanza, C.	31622	06/06/80	-1.6	-75.6667		17/12/20
03/08/20	6426	GBIF	PRESERVED_SPECIMEN	US	1317988194	HYBRID	Theobroma	sylvestre		Theobroma speciosum Willd. ex Spreng.	Cuatrecasas, J.	26656	07/11/62	-1.436226	-48.449192	1317988194	13/04/21
03/08/20	6428	GBIF	PRESERVED_SPECIMEN	US	1317984474	SPECIES	Herrania	cuatrecasana		Herrania cuatrecasana GarcÃ­a-Barr.	Reyes, D. & Carrillo, L.	374	22/03/04	-0.3738889	-76.5522222	1317984474	17/12/20
03/08/20	6436	GBIF	PRESERVED_SPECIMEN	US	1317944783	SPECIES	Theobroma	speciosum		Theobroma speciosum Willd. ex Spreng.	D.a.bell, L.J.G.E.H.W.C.C. & Ramirez, L.	94-237	11/03/94	-0.5231	-75.2569		20/08/20
03/08/20	14704	GBIF	PRESERVED_SPECIMEN	COAH	768747669	SPECIES	Theobroma	glaucum		Theobroma glaucum H.Karst.	Posada, A.; et al.	2238	22/08/96	-3.68	-70.39	768747669	07/09/20
03/08/20	287	GBIF	PRESERVED_SPECIMEN	WAG	2626730362	SPECIES	Theobroma	glaucum		Theobroma glaucum H.Karst.	Croat, T.B.	20510	20/09/72	-2.480278	-73.611389	2516405780	03/09/20
03/08/20	6470	GBIF	PRESERVED_SPECIMEN	US	1317835963	SPECIES	Theobroma	guianense		Theobroma guianense (Aubl.) J.F.Gmel.	Cazalet, P.C.D. & Pennington, T.D.	7616	//1962	-2.3833	-77.5	1317835963	02/04/21
03/08/20	14627	GBIF	PRESERVED_SPECIMEN	COAH	768770158	SPECIES	Theobroma	glaucum		Theobroma glaucum H.Karst.	CÃ¡rdenas, D.; et al.	19148	25/07/06	1.44	-71.05		07/09/20
03/08/20	6505	GBIF	PRESERVED_SPECIMEN	US	1317732791	SPECIES	Theobroma	guianense		Theobroma guianense (Aubl.) J.F.Gmel.	VÃ¡squez, R.; et al.	8953	07/03/87	-3.6667	-73.4167	1317732791	02/04/21
03/08/20	6517	GBIF	PRESERVED_SPECIMEN	US	1317682264	SPECIES	Herrania	mariae		Herrania mariae (Mart.) Decne. ex Goudot	Ehringhaus, C.; et al.	331	05/12/95	-8.4167	-71.3333	1929399228	18/11/21
03/08/20	6523	GBIF	PRESERVED_SPECIMEN	US	1317658323	SPECIES	Theobroma	obovatum		Theobroma obovatum Klotzsch ex Bernoulli	Graham, J.G. & Vigo, J.S.	4260	19/07/07	-9.3538889	-74.4780556	1317658323	05/10/20
03/08/20	6535	GBIF	PRESERVED_SPECIMEN	US	1317622349	SPECIES	Herrania	balaensis		Herrania balaensis Preuss	B. Boyle, J.K.S. & Uebel, V.	3726	20/08/94	0.8667	-78.035		12/11/20
03/08/20	6549	GBIF	PRESERVED_SPECIMEN	US	1317563828	SPECIES	Herrania	balaensis		Herrania balaensis Preuss	Little-Junior, E.L.	6353	23/04/43	1.0015221	-78.6859565	1317563828	12/11/20
03/08/20	6551	GBIF	PRESERVED_SPECIMEN	US	1317548665	SPECIES	Theobroma	guianense		Theobroma guianense (Aubl.) J.F.Gmel.	Espinoza, S. & Gualinga, C.	834	26/09/91	-1.4167	-77.3333	1317548665	02/04/21
03/08/20	6552	GBIF	PRESERVED_SPECIMEN	US	1317535645	SPECIES	Theobroma	guianense		Theobroma guianense (Aubl.) J.F.Gmel.	Sebatier, D. & PrÃ©vost, M.F.	2216	09/09/88	5.05	-53.05	1317535645	02/04/21
03/08/20	6555	GBIF	PRESERVED_SPECIMEN	US	1317512185	SPECIES	Theobroma	guianense		Theobroma guianense (Aubl.) J.F.Gmel.	Sabatier, D. & PrÃ©vost, M.F.	3024	06/10/89	5.3333	-53	1317512185	02/04/21
03/08/20	6560	GBIF	PRESERVED_SPECIMEN	US	1317492444	SPECIES	Theobroma	guianense		Theobroma guianense (Aubl.) J.F.Gmel.	Jansen-Jacobs, M.J.; et al.	5940	16/09/99	3.1333	-58.5333	2515418813	21/12/20
03/08/20	4150	GBIF	PRESERVED_SPECIMEN	FMB	1707535825	SPECIES	Theobroma	glaucum		Theobroma glaucum H.Karst.	Stevenson, P.	118	25/04/90	2.66	-74.16	768737610	05/03/21
03/08/20	6568	GBIF	PRESERVED_SPECIMEN	US	1317454047	SPECIES	Theobroma	guianense	Theobroma guianense	Theobroma guianense (Aubl.) J.F.Gmel.	Jansen-Jacobs, M.J.; et al.	2334	03/02/91	2.1667	-59.25	2517422994	30/11/20
03/08/20	6591	GBIF	PRESERVED_SPECIMEN	US	1317372412	SPECIES	Herrania	nitida		Herrania nitida (Poepp.) R.E.Schult.	Revilla, J.	2988	//1977	-2.5575012	-73.487784	1317372412	01/06/21
03/08/20	6600	GBIF	PRESERVED_SPECIMEN	US	1317342356	SPECIES	Herrania	mariae		Herrania mariae (Mart.) Decne. ex Goudot	Cuatrecasas, J.; et al.	27251	27/01/69	-4.203165	-69.935907	1317342356	07/05/21
03/08/20	6605	GBIF	PRESERVED_SPECIMEN	US	1317336353	SPECIES	Herrania	nitida		Herrania nitida (Poepp.) R.E.Schult.	Lawesson, J.E.; et al.	39300	27/02/83	-0.5167	-76.3833	1317336353	01/06/21
03/08/20	6607	GBIF	PRESERVED_SPECIMEN	US	1317322745	VARIETY	Herrania	nitida		Herrania nitida var. sphenophylla R.E.Schult.	Schultes, R.E.	8129	/9/1946	-2.3271726	-70.5338808	1317322745	01/06/21
03/08/20	6612	GBIF	PRESERVED_SPECIMEN	US	1317309372	SPECIES	Theobroma	obovatum		Theobroma obovatum Klotzsch ex Bernoulli	Huamantupa, I.; et al.	7832	28/06/06	-4.6533333	-73.8216667	1317309372	05/10/20
03/08/20	6619	GBIF	PRESERVED_SPECIMEN	US	1317289358	SPECIES	Theobroma	simiarum		Theobroma simiarum Donn.Sm.	Gentry, A.H.; et al.	75901	29/02/92	6.5833	-76.8333	1707553082	23/10/20
03/08/20	6622	GBIF	PRESERVED_SPECIMEN	US	1317283847	SPECIES	Theobroma	guianense		Theobroma guianense (Aubl.) J.F.Gmel.	P. Nunez, H.B.L.C.N. & Tenteyo, J.	23743	02/09/98	-11.8825	-72.6517		02/04/21
03/08/20	6629	GBIF	PRESERVED_SPECIMEN	US	1317248535	SPECIES	Theobroma	guianense		Theobroma guianense (Aubl.) J.F.Gmel.	Aulestia, M. & Andi, J.	901	21/10/93	-0.85	-76.4333	1317248535	02/04/21
03/08/20	6654	GBIF	PRESERVED_SPECIMEN	COL	1315025720	SPECIES	Theobroma	guianense		Theobroma guianense (Aubl.) J.F.Gmel.	Torres, S.C.	s.n.	11/10/94	-4.12139	-69.95		17/03/21
03/08/20	6655	GBIF	PRESERVED_SPECIMEN	COL	1315012760	SPECIES	Herrania	nitida		Herrania nitida (Poepp.) R.E.Schult.	Morales, P.M.E.	s.n.	16/11/95	4.18384	-73.653		07/04/21
03/08/20	6656	GBIF	PRESERVED_SPECIMEN	COL	1314985909	SPECIES	Herrania	nitida		Herrania nitida (Poepp.) R.E.Schult.	Baker, R.E.D. & Cope, F.W.	s.n.	23/09/52	-1.32028	-69.5881		07/04/21
03/08/20	6657	GBIF	PRESERVED_SPECIMEN	COL	1314985897	SPECIES	Herrania	nitida		Herrania nitida (Poepp.) R.E.Schult.	Tellez, S.	s.n.	05/03/87	4.45896	-73.3967		07/04/21
03/08/20	6659	GBIF	PRESERVED_SPECIMEN	COL	1314985889	SPECIES	Herrania	nitida		Herrania nitida (Poepp.) R.E.Schult.	Idrobo, J.M.	s.n.	20/12/50	3.28936	-73.9054		07/04/21
03/08/20	6660	GBIF	PRESERVED_SPECIMEN	COL	1314985879	SPECIES	Herrania	breviligulata		Herrania breviligulata R.E.Schult.	Cope, F.W.	s.n.	17/03/53	1.09346	-76.623		11/11/20
03/08/20	6661	GBIF	PRESERVED_SPECIMEN	COL	1314985872	SPECIES	Herrania	purpurea		Herrania purpurea (Pittier) R.E.Schult.	Alverson, W.S.	s.n.	21/02/77	7.21498	-75.0522		09/12/20
03/08/20	6663	GBIF	PRESERVED_SPECIMEN	COL	1314985864	SPECIES	Herrania	albiflora		Herrania albiflora Goudot	Renteria, A.E.	s.n.	20/06/80	7.08361	-74.7036		09/11/20
03/08/20	6667	GBIF	PRESERVED_SPECIMEN	COL	1314985857	SPECIES	Herrania	nycterodendron		Herrania nycterodendron R.E.Schult.	Baker, R.E.D.	s.n.	25/09/52	-1.32028	-69.5881	1314985857	07/04/21
03/08/20	6668	GBIF	PRESERVED_SPECIMEN	COL	1314985856	SPECIES	Herrania	laciniifolia		Herrania laciniifolia Goudot ex Triana & Planch.	Cogollo, A.	s.n.	26/10/83	5.93572	-74.8493		09/11/20
03/08/20	6670	GBIF	PRESERVED_SPECIMEN	COL	1314985852	SPECIES	Herrania	laciniifolia		Herrania laciniifolia Goudot ex Triana & Planch.	Romero, C.R.	s.n.	//	5.1992	-74.8969		10/11/20
03/08/20	6671	GBIF	PRESERVED_SPECIMEN	COL	1314985851	SPECIES	Herrania	laciniifolia		Herrania laciniifolia Goudot ex Triana & Planch.	Forero, G.E.	s.n.	//	4.88528	-76.2803		10/11/20
03/08/20	6672	GBIF	PRESERVED_SPECIMEN	COL	1314985850	SPECIES	Herrania	mariae		Herrania mariae (Mart.) Decne. ex Goudot	Schultes, R.E.	s.n.	01/07/60	1.09346	-76.623		07/04/21
03/08/20	6675	GBIF	PRESERVED_SPECIMEN	COL	1314985845	SPECIES	Herrania	purpurea		Herrania purpurea (Pittier) R.E.Schult.	s.c.	s.n.	14/12/76	7.21667	-75.05		09/12/20
03/08/20	6676	GBIF	PRESERVED_SPECIMEN	COL	1314985844	SPECIES	Herrania	cuatrecasana		Herrania cuatrecasana GarcÃ­a-Barr.	Garcia, B.H.	s.n.	18/06/67	3.47852	-76.1896		16/12/20
03/08/20	6678	GBIF	PRESERVED_SPECIMEN	COL	1314985842	SPECIES	Herrania	cuatrecasana		Herrania cuatrecasana GarcÃ­a-Barr.	Cope, F.W.	s.n.	17/03/53	1.09346	-76.623		16/12/20
03/08/20	6679	GBIF	PRESERVED_SPECIMEN	COL	1314985838	SPECIES	Herrania	laciniifolia		Herrania laciniifolia Goudot ex Triana & Planch.	Garcia, B.H.	s.n.	07/12/39	5.0672	-74.9667		10/11/20
03/08/20	6680	GBIF	PRESERVED_SPECIMEN	COL	1314985837	SPECIES	Herrania	albiflora		Herrania albiflora Goudot	Ramirez, J.G.; et al.	s.n.	//	6	-74.7833		09/11/20
03/08/20	6685	GBIF	PRESERVED_SPECIMEN	COL	1314937214	SPECIES	Theobroma	guianense		Theobroma guianense (Aubl.) J.F.Gmel.	Narvaez, R.L.H.	s.n.	//	-3.81556	-70.2808		17/03/21
03/08/20	6700	GBIF	PRESERVED_SPECIMEN	MG	1314859293	SPECIES	Herrania	mariae		Herrania mariae (Mart.) Decne. ex Goudot	Silva, M.G.	1955	26/09/68	-3.2890407	-62.9727701	1314859293	07/06/21
03/08/20	6701	GBIF	PRESERVED_SPECIMEN	MG	1314858857	SPECIES	Theobroma	guianense		Theobroma guianense (Aubl.) J.F.Gmel.	Prance, G.T.	32773	24/11/66	-7.3629104	-62.4853886		17/03/21
03/08/20	6704	GBIF	PRESERVED_SPECIMEN	MG	1314858170	SPECIES	Theobroma	speciosum		Theobroma speciosum Willd. ex Spreng.	Werner, C.A.B.	44	25/08/80	-15.1908258	-59.9808239	1314858170	19/08/20
03/08/20	6729	GBIF	PRESERVED_SPECIMEN	MG	1314855631	SPECIES	Theobroma	microcarpum		Theobroma microcarpum Mart.	Lobato, L.C.B. & Almeida, S.S.	2257	27/10/97	-9.1533708	-64.3064811	1314855631	17/09/20
03/08/20	6730	GBIF	PRESERVED_SPECIMEN	MG	1314855547	SPECIES	Theobroma	guianense		Theobroma guianense (Aubl.) J.F.Gmel.	Lobato, L.C.B. & Almeida, S.S.	2045	22/10/97	-9.1533708	-64.3064811	1314855547	17/03/21
03/08/20	6732	GBIF	PRESERVED_SPECIMEN	MG	1314855461	SPECIES	Theobroma	obovatum		Theobroma obovatum Klotzsch ex Bernoulli	GonÃ§alves, L.	s.n.	//	-1.3396326	-48.2754131	1314855459	05/10/20
03/08/20	6751	GBIF	PRESERVED_SPECIMEN	MG	1314853518	SPECIES	Theobroma	obovatum		Theobroma obovatum Klotzsch ex Bernoulli	Rosa, N.A. & Nascimento, F.C.	5417	13/12/90	-2.4284447	-65.0382764	1314853518	05/10/20
03/08/20	6756	GBIF	PRESERVED_SPECIMEN	MG	1314852828	SPECIES	Theobroma	guianense		Theobroma guianense (Aubl.) J.F.Gmel.	Daly, D.C.; et al.	6181	10/09/89	-3.766667	-73.333333	1314852828	17/03/21
03/08/20	3217	GBIF	PRESERVED_SPECIMEN	NY	1928434701	SPECIES	Theobroma	guianense		Theobroma guianense (Aubl.) J.F.Gmel.	Fiaschi, P.; et al.	3282	21/08/08	-7.4465	-73.65761	1928434701	20/11/20
03/08/20	6774	GBIF	PRESERVED_SPECIMEN	MG	1314850953	SPECIES	Theobroma	guianense		Theobroma guianense (Aubl.) J.F.Gmel.	Martins, E.S.	11	/10/1987	2.1866504	-62.4690647	1314850953	17/03/21
03/08/20	6347	GBIF	PRESERVED_SPECIMEN	US	1318335187	SPECIES	Theobroma	velutinum		Theobroma velutinum Benoist	Bordenave, B.	316	13/10/92	3.6166667	-53.2166667	437310476	10/08/20
03/08/20	6757	GBIF	PRESERVED_SPECIMEN	MG	1314852747	SPECIES	Theobroma	speciosum		Theobroma speciosum Willd. ex Spreng.	Dias, A.T.G.	402	20/10/86	-6.4826635	-53.8850377	1314852747	19/08/20
03/08/20	6762	GBIF	PRESERVED_SPECIMEN	MG	1314851990	SPECIES	Theobroma	speciosum		Theobroma speciosum Willd. ex Spreng.	Maciel, U.N. & Rosario, C.S.	1405	27/08/84	-11.1661492	-61.8778613	1314851990	19/08/20
03/08/20	6793	GBIF	PRESERVED_SPECIMEN	MG	1314848279	SPECIES	Theobroma	speciosum		Theobroma speciosum Willd. ex Spreng.	Silva, A.S.L. & Rosario, C.S.	4400	/12/2009	-1.3132465	-51.0759627		19/08/20
03/08/20	6794	GBIF	PRESERVED_SPECIMEN	MG	1314848164	SPECIES	Theobroma	guianense		Theobroma guianense (Aubl.) J.F.Gmel.	Sousa, J.S.; et al.	438	02/05/10	-4.891389	-65.302778	1042639842	17/03/21
03/08/20	6796	GBIF	PRESERVED_SPECIMEN	MG	1314848110	SPECIES	Theobroma	sylvestre		Theobroma sylvestre Mart.	Rodrigues, S.T.	411	28/05/10	-1.3973898	-48.3198725	1314848110	31/08/20
03/08/20	6799	GBIF	PRESERVED_SPECIMEN	MG	1314848030	SPECIES	Theobroma	obovatum		Theobroma obovatum Klotzsch ex Bernoulli	Rodrigues, S.T.	406	28/05/10	-1.3973898	-48.3198725	1314848030	05/10/20
03/08/20	6805	GBIF	PRESERVED_SPECIMEN	MG	1314847568	SPECIES	Theobroma	guianense		Theobroma guianense (Aubl.) J.F.Gmel.	Felix-Da, M.M.; et al.	201	08/02/07	-1.982778	-51.637778		17/03/21
03/08/20	6808	GBIF	PRESERVED_SPECIMEN	MG	1314847102	SPECIES	Theobroma	speciosum		Theobroma speciosum Willd. ex Spreng.	Rocha, A.E.S. & Silva, J.B.F.	774	17/10/07	-6.416389	-48.574444		19/08/20
03/08/20	6809	GBIF	PRESERVED_SPECIMEN	MG	1314846669	SPECIES	Theobroma	obovatum		Theobroma obovatum Klotzsch ex Bernoulli	Lavareda, R.H.R.; et al.	102	21/03/07	-4.839722	-65.054167	1314846669	05/10/20
03/08/20	6815	GBIF	PRESERVED_SPECIMEN	MG	1314845880	SPECIES	Theobroma	sylvestre		Theobroma sylvestre Mart.	Assuncao, P.A.C.L. & Silva, C.F.	646	11/09/97	-2.883333	-59.97	1265517993	13/04/21
03/08/20	6819	GBIF	PRESERVED_SPECIMEN	MG	1314845347	SPECIES	Theobroma	guianense		Theobroma guianense (Aubl.) J.F.Gmel.	Oliveira, J. & Amaral, D.D.	383	17/05/02	-1.3132465	-51.0759627		17/03/21
03/08/20	6820	GBIF	PRESERVED_SPECIMEN	MG	1314845339	SPECIES	Theobroma	guianense		Theobroma guianense (Aubl.) J.F.Gmel.	Oliveira, J.; et al.	323	14/03/02	-1.4985741	-48.6339466	1314845339	17/03/21
03/08/20	6791	GBIF	PRESERVED_SPECIMEN	MG	1314848410	SPECIES	Theobroma	speciosum		Theobroma speciosum Willd. ex Spreng.	Silva, W.L.S. & Garcia, T.B.	45	29/12/10	-2.6840528	-49.0739712	1314848410	19/08/20
03/08/20	6828	GBIF	PRESERVED_SPECIMEN	MG	1314844461	SPECIES	Herrania	nitida	Herrania atrorubens	Herrania nitida (Poepp.) R.E.Schult.	Souza, S.A.M. & Nascimento, O.C.	578	28/11/86	-6.4826635	-53.8850377	1314844461	22/04/21
03/08/20	6804	GBIF	PRESERVED_SPECIMEN	MG	1314847678	SPECIES	Theobroma	speciosum		Theobroma speciosum Willd. ex Spreng.	Pietrobom, M.R. & Maciel, S.	8246	12/12/08	0.3142958	-54.2257577	1314847678	19/08/20
03/08/20	6822	GBIF	PRESERVED_SPECIMEN	MG	1314844821	SPECIES	Theobroma	speciosum		Theobroma speciosum Willd. ex Spreng.	Grogan, J.	440	//	-7.737198	-50.1233123	1042532245	12/04/21
03/08/20	6847	GBIF	PRESERVED_SPECIMEN	MG	1314843145	SPECIES	Theobroma	obovatum		Theobroma obovatum Klotzsch ex Bernoulli	Monteiro, O.P. & Damiao, C.	513	19/02/76	-8.0651502	-72.8671599	1042573044	02/10/20
03/08/20	6848	GBIF	PRESERVED_SPECIMEN	MG	1314843134	SPECIES	Theobroma	guianense		Theobroma guianense (Aubl.) J.F.Gmel.	Monteiro, O.P. & Mota, C.D.A.	117	05/02/76	-8.0651502	-72.8671599	1314843134	17/03/21
03/08/20	6855	GBIF	PRESERVED_SPECIMEN	MG	1314842880	SPECIES	Herrania	mariae		Herrania mariae (Mart.) Decne. ex Goudot	Silva, M.G. & Rosa, N.A.	3465	21/10/77	-6.4826635	-53.8850377		07/06/21
03/08/20	6831	GBIF	PRESERVED_SPECIMEN	MG	1314843931	SPECIES	Theobroma	speciosum		Theobroma speciosum Willd. ex Spreng.	Miranda, I.S.	1838	21/06/98	-11.8945177	-60.830344	1314843931	19/08/20
03/08/20	6865	GBIF	PRESERVED_SPECIMEN	MG	1314842469	SPECIES	Theobroma	guianense		Theobroma guianense (Aubl.) J.F.Gmel.	Rosa, N.A.	1187	10/10/76	0.901711	-52.0033808	1314842469	19/10/20
03/08/20	6868	GBIF	PRESERVED_SPECIMEN	MG	1314842275	SPECIES	Theobroma	guianense		Theobroma guianense (Aubl.) J.F.Gmel.	Rosa, N.A. & Pires, J.M.	875	15/08/76	-10.866667	-63.82	1042632666	19/10/20
03/08/20	6835	GBIF	PRESERVED_SPECIMEN	MG	1314843688	SPECIES	Theobroma	speciosum		Theobroma speciosum Willd. ex Spreng.	Cavalcante, P.B. & Silva, M.G.	1538	03/12/66	-2.603619	-54.664759	1314843688	19/08/20
03/08/20	6880	GBIF	PRESERVED_SPECIMEN	MG	1314841043	SPECIES	Theobroma	guianense		Theobroma guianense (Aubl.) J.F.Gmel.	Oliveira, E.	6083	24/07/73	-2.0437434	-47.2341471	1314841043	17/03/21
03/08/20	6892	GBIF	PRESERVED_SPECIMEN	MG	1314839710	SPECIES	Herrania	mariae		Herrania mariae (Mart.) Decne. ex Goudot	Gely, A.	214	14/01/85	-1.4985741	-48.6339466	1314839710	22/04/21
03/08/20	6877	GBIF	PRESERVED_SPECIMEN	MG	1314841262	SPECIES	Theobroma	speciosum		Theobroma speciosum Willd. ex Spreng.	Pires, J.M. & Belem, R.P.	12566	/7/1970	-5.5	-50.25	1314841262	19/08/20
03/08/20	6899	GBIF	PRESERVED_SPECIMEN	MG	1314838768	SPECIES	Theobroma	speciosum		Theobroma speciosum Willd. ex Spreng.	Santos, J.U.M. & Rosario, C.S.	771	11/05/84	-12.0880135	-60.2524746	1314838768	19/08/20
03/08/20	6911	GBIF	PRESERVED_SPECIMEN	MG	1314837545	SPECIES	Theobroma	guianense		Theobroma guianense (Aubl.) J.F.Gmel.	Lisboa, P.L.B. & Rosa, N.A.	1829	15/10/80	-5.1188013	-67.3376186	1314837545	28/12/20
03/08/20	6923	GBIF	PRESERVED_SPECIMEN	MG	1314836384	SPECIES	Theobroma	speciosum		Theobroma speciosum Willd. ex Spreng.	Daly, D.C.; et al.	749	24/10/80	-4.033333	-46.083333	1319879759	31/08/20
03/08/20	6925	GBIF	PRESERVED_SPECIMEN	MG	1314836236	SPECIES	Theobroma	speciosum		Theobroma speciosum Willd. ex Spreng.	Cid-Ferreira, C.A.; Nelson, B.W.	2808	09/10/80	-10.0530226	-68.3150359	1318580275	10/08/20
03/08/20	6937	GBIF	PRESERVED_SPECIMEN	MG	1314834738	SPECIES	Theobroma	obovatum		Theobroma obovatum Klotzsch ex Bernoulli	Silva, A.S.L. & Rosa, N.A.	837	/6/1980	-5.1188013	-67.3376186	1314834738	05/10/20
03/08/20	6957	GBIF	PRESERVED_SPECIMEN	MG	1314832255	SPECIES	Theobroma	sylvestre		Theobroma sylvestre Mart.	Ducke, A.	s.n.	30/10/12	-4.4372258	-64.1247109	1314832255	19/08/20
03/08/20	6961	GBIF	PRESERVED_SPECIMEN	MG	1314831985	SPECIES	Herrania	nitida	Herrania atrorubens	Herrania nitida (Poepp.) R.E.Schult.	Ducke, A.	s.n.	06/03/09	-0.1704006	-55.6749531	1314831985	22/04/21
03/08/20	6968	GBIF	PRESERVED_SPECIMEN	MG	1314831565	SPECIES	Theobroma	guianense	Theobroma duckei	Theobroma guianense (Aubl.) J.F.Gmel.	Ducke, A.	s.n.	21/09/06	-3.0506626	-69.0838059	1314831565	17/03/21
03/08/20	14688	GBIF	PRESERVED_SPECIMEN	COAH	768752035	SPECIES	Theobroma	guianense		Theobroma guianense (Aubl.) J.F.Gmel.	Duque, A.; et al.	162	01/05/92	-0.53	-72.09	768752035	28/12/20
03/08/20	6964	GBIF	PRESERVED_SPECIMEN	MG	1314831636	SPECIES	Theobroma	speciosum		Theobroma speciosum Willd. ex Spreng.	Ducke, A.	s.n.	08/12/06	0.2541844	-57.1497117	1314831636	17/08/20
03/08/20	9757	GBIF	PRESERVED_SPECIMEN	JBGP	1273758365	SPECIES	Herrania	lemniscata		Herrania lemniscata (Schomb.) R.E.Schult.	Cuadros, H.	2174	09/04/85	8.559444	-74.194167		10/11/20
03/08/20	6988	GBIF	PRESERVED_SPECIMEN	MG	1314830837	SPECIES	Theobroma	speciosum		Theobroma speciosum Willd. ex Spreng.	Huber, J.	1748	/12/1899	-1.1979637	-46.765411	1314830837	19/08/20
03/08/20	9788	GBIF	PRESERVED_SPECIMEN	K	1265518229	SPECIES	Theobroma	speciosum		Theobroma speciosum Willd. ex Spreng.	Sasaki, D.; et al.	210	19/07/06	-9	-55	1042612703	20/08/20
03/08/20	6395	GBIF	PRESERVED_SPECIMEN	US	1318122324	SPECIES	Theobroma	velutinum		Theobroma velutinum Benoist	Mori, S.; Pipoly, J.	15584	11/04/83	3.6166667	-53.2	1318122324	10/08/20
03/08/20	9872	GBIF	PRESERVED_SPECIMEN	K	1265518051	SPECIES	Herrania	camargoana		Herrania camargoana R.E.Schult.	Milliken, W.	1796	/8/1993	1.5	-63	1265518051	04/05/21
03/08/20	9886	GBIF	PRESERVED_SPECIMEN	K	1265518009	SPECIES	Herrania	camargoana		Herrania camargoana R.E.Schult.	Bartley, B.G. & Holliday, P.C.	T56	17/11/52	0.10481	-67.53826	1265518009	17/11/20
03/08/20	9897	GBIF	PRESERVED_SPECIMEN	K	1265517997	SPECIES	Herrania	lemniscata		Herrania lemniscata (Schomb.) R.E.Schult.	Milliken, W.	2372	/6/1995	2.6111111	-63.8744444	1265517997	04/05/21
03/08/20	9949	GBIF	PRESERVED_SPECIMEN	P	1265097361	SPECIES	Theobroma	mammosum		Theobroma mammosum Cuatrec. & J.LeÃ³n	Cuatrecasas, J. & Paredes, A.	26535	6-7/11/1961	9.9919	-83.1126	1701728747	02/11/20
03/08/20	9952	GBIF	PRESERVED_SPECIMEN	F	1262202119	SPECIES	Theobroma	obovatum		Theobroma obovatum Klotzsch ex Bernoulli	DÃ¡vila, N.; et al.	4960	22/10/07	-0.1004444	-75.1679722	1262202119	28/09/20
03/08/20	14796	GBIF	PRESERVED_SPECIMEN	COAH	768723843	SPECIES	Theobroma	glaucum		Theobroma glaucum H.Karst.	Palacios, P.A. & Jaramillo, R.	310	25/05/84	-0.92	-71.61	1890989382	07/09/20
03/08/20	5764	GBIF	PRESERVED_SPECIMEN	US	1320338352	SPECIES	Theobroma	obovatum		Theobroma obovatum Klotzsch ex Bernoulli	VÃ¡squez, R. & Jaramillo, N.	5861	25/10/84	-3.75	-73.4167	1320338352	05/10/20
03/08/20	10024	GBIF	PRESERVED_SPECIMEN	MO	1261688446	SPECIES	Theobroma	simiarum		Theobroma simiarum Donn.Sm.	Araya, F.	210	15/03/93	10.6416667	-84.0041667	1228248259	26/10/20
03/08/20	10041	GBIF	PRESERVED_SPECIMEN	MO	1261549876	SPECIES	Theobroma	guianense		Theobroma guianense (Aubl.) J.F.Gmel.	Dik, A.	860	06/12/93	-0.83333	-76.36666	1319389880	04/12/20
03/08/20	10066	GBIF	PRESERVED_SPECIMEN	MO	1261496849	SPECIES	Theobroma	obovatum		Theobroma obovatum Klotzsch ex Bernoulli	Pipoly, J.; et al.	14593	05/03/91	-3.3333333	-72.9166667	1261496849	02/10/20
03/08/20	10107	GBIF	PRESERVED_SPECIMEN	MO	1260890570	SPECIES	Theobroma	guianense		Theobroma guianense (Aubl.) J.F.Gmel.	Daly, D.C.; et al.	6181	10/09/89	-3.76666	-73.33333	1314852828	04/12/20
03/08/20	10163	GBIF	PRESERVED_SPECIMEN	MO	1260805650	SPECIES	Theobroma	microcarpum		Theobroma microcarpum Mart.	Daly, D.C.; et al.	9427	10/03/97	-9.41111	-68.12388	1930438043	14/09/20
03/08/20	10164	GBIF	PRESERVED_SPECIMEN	MO	1260804970	SPECIES	Theobroma	guianense		Theobroma guianense (Aubl.) J.F.Gmel.	Jansen-Jacobs, M.J.; et al.	5940	16/09/99	3.13333	-58.53333	2515418813	04/12/20
03/08/20	10210	GBIF	PRESERVED_SPECIMEN	MO	1260714287	SPECIES	Theobroma	guianense		Theobroma guianense (Aubl.) J.F.Gmel.	Manuel Rimachi, Y.	3512	30/03/78	-3.9438778	-73.6065223	1228547070	04/12/20
03/08/20	10215	GBIF	PRESERVED_SPECIMEN	MO	1260702057	SPECIES	Herrania	purpurea		Herrania purpurea (Pittier) R.E.Schult.	Brandbyge, J.S. & Asanza, E.C.	30341	26/03/80	-0.46666	-76.81666	1260702057	04/12/20
03/08/20	10227	GBIF	PRESERVED_SPECIMEN	MO	1260660513	SPECIES	Theobroma	guianense		Theobroma guianense (Aubl.) J.F.Gmel.	Sothers, C.A. & Pereira, E.C.	148	26/08/94	-2.88333	-59.96666	1424167238	04/12/20
03/08/20	10251	GBIF	PRESERVED_SPECIMEN	MO	1260581359	SPECIES	Herrania	nitida		Herrania nitida (Poepp.) R.E.Schult.	Graham, J.G. & Vigo, J.S.	168	17/10/97	-10.06666	-71.1	1228305797	04/12/20
03/08/20	4756	GBIF	PRESERVED_SPECIMEN	F	1424762762	SPECIES	Theobroma	guianense		Theobroma guianense (Aubl.) J.F.Gmel.	VÃ¡squez, R. & Jaramillo, N.	7942	23/09/86	-3.9167	-73.5833	1424762762	19/03/21
03/08/20	10322	GBIF	PRESERVED_SPECIMEN	MO	1260442750	SPECIES	Herrania	nitida		Herrania nycterodendron R.E.Schult.	Ayala, F.; et al.	3298	23/04/82	-2.5575012	-73.487784	1228503698	04/12/20
03/08/20	10334	GBIF	PRESERVED_SPECIMEN	MO	1260441543	SPECIES	Herrania	pulcherrima		Herrania pulcherrima Goudot	Lawrance, A.E.	437	//1932	5.454511	-73.362003	1260441543	04/12/20
03/08/20	10351	GBIF	PRESERVED_SPECIMEN	MO	1260438846	SPECIES	Herrania	nitida		Herrania nitida (Poepp.) R.E.Schult.	Schultes, R.E.	17777	05/10/52	-1.325744	-69.581533	1260438846	04/12/20
03/08/20	10355	GBIF	PRESERVED_SPECIMEN	MO	1260438068	SPECIES	Herrania	nitida		Herrania nitida (Poepp.) R.E.Schult.	Gentry, A.H.; et al.	8390	05/05/75	-76.5188791	-8.1892608	1228397365	04/12/20
03/08/20	10356	GBIF	PRESERVED_SPECIMEN	MO	1260437937	SPECIES	Herrania	nitida		Herrania nitida (Poepp.) R.E.Schult.	Vigo, J.S.	8135	27/11/74	-8.1892608	-76.5188791	1228213629	04/12/20
03/08/20	14708	GBIF	PRESERVED_SPECIMEN	COAH	768745164	SPECIES	Theobroma	guianense		Theobroma guianense (Aubl.) J.F.Gmel.	CÃ¡rdenas, D.; et al.	8292	28/07/97	-2.12	-69.85	768745164	28/12/20
03/08/20	14790	GBIF	PRESERVED_SPECIMEN	COAH	768725020	SPECIES	Herrania	nitida		Herrania nitida (Poepp.) R.E.Schult.	CÃ¡rdenas, D.; et al.	5291	07/08/94	-2.7	-69.75	768725020	07/04/21
03/08/20	10366	GBIF	PRESERVED_SPECIMEN	MO	1260434900	SPECIES	Herrania	nycterodendron		Herrania nycterodendron R.E.Schult.	Zarucchi, J.L. & Schultes, R.E.	1052	04/03/75	-3.784425	-70.357892	1260434900	04/12/20
03/08/20	10371	GBIF	PRESERVED_SPECIMEN	MO	1260434653	SPECIES	Herrania	albiflora		Herrania albiflora Goudot	Fonnegra, R.; et al.	8105	18/02/04	6.468278	-74.337917	930989636	04/12/20
03/08/20	3086	GBIF	PRESERVED_SPECIMEN	NY	1929225126	SPECIES	Theobroma	guianense		Theobroma guianense (Aubl.) J.F.Gmel.	Medeiros, H.; et al.	961	08/02/12	-9.179367	-63.015414	1929225126	26/03/21
03/08/20	10402	GBIF	PRESERVED_SPECIMEN	MO	1260431134	SPECIES	Herrania	purpurea		Herrania purpurea (Pittier) R.E.Schult.	Shepherd, J.D.	686	14/12/76	7.216667	-75.050556	931010670	09/11/20
03/08/20	10407	GBIF	PRESERVED_SPECIMEN	MO	1260430643	SPECIES	Herrania	cuatrecasana		Herrania cuatrecasana GarcÃ­a-Barr.	Schultes, R.E. & Cabrera, I.	18976	23/03/53	0.16666	-75.83333	1260430643	04/12/20
03/08/20	10450	GBIF	PRESERVED_SPECIMEN	MO	1260136375	SPECIES	Theobroma	sinuosum	Theobroma tessmannii	Theobroma sinuosum Pav. ex Huber	Tessmann, G.	4928	//1924	-2.5575012	-73.487784	1260136375	04/12/20
03/08/20	4299	GBIF	PRESERVED_SPECIMEN	RB	1586074753	SPECIES	Theobroma	speciosum		Theobroma speciosum Willd. ex Spreng.	Cabral, F.F.; et al.	162	13/09/09	-9.863	-56.074	1586074753	24/08/20
03/08/20	2691	GBIF	PRESERVED_SPECIMEN	COAH	1932889202	SPECIES	Theobroma	glaucum		Theobroma glaucum H.Karst.	Correa, M.D.; et al.	4509	20/11/04	1.65	-75.57	1932889202	04/09/20
03/08/20	13048	GBIF	PRESERVED_SPECIMEN	HUA	1123909439	SPECIES	Theobroma	glaucum		Theobroma glaucum H.Karst.	Fonnegra, R.; et al.	137	18/04/77	7.304819	-75.071437	1123909439	07/09/20
03/08/20	10669	GBIF	PRESERVED_SPECIMEN	MO	1259210203	SPECIES	Theobroma	obovatum		Theobroma obovatum Klotzsch ex Bernoulli	Revilla, J. & Carrillo, E.	1494	14/10/76	-3.822219	-73.3255442	1259210203	04/12/20
03/08/20	5057	GBIF	PRESERVED_SPECIMEN	COAH	1324648223	SPECIES	Theobroma	glaucum		Theobroma glaucum H.Karst.	Aguilar, M.	314	24/04/12	1.55	-75.69		04/09/20
03/08/20	10686	GBIF	PRESERVED_SPECIMEN	MO	1259209727	SPECIES	Theobroma	obovatum		Theobroma obovatum Klotzsch ex Bernoulli	Gentry, A.H. & Revilla, J.	16116	21/01/76	-8.6937418	-74.0575285	1317853763	30/09/20
03/08/20	10691	GBIF	PRESERVED_SPECIMEN	MO	1259209564	SPECIES	Theobroma	obovatum		Theobroma obovatum Klotzsch ex Bernoulli	Pipoly, J.	16088	15/11/91	-3.78333	-70.25	1707547626	04/12/20
03/08/20	14646	GBIF	PRESERVED_SPECIMEN	COAH	768761135	SPECIES	Theobroma	glaucum		Theobroma glaucum H.Karst.	GaitÃ¡n, M.; et al.	37	24/04/02	2.58	-74.33	768761135	07/09/20
03/08/20	10705	GBIF	PRESERVED_SPECIMEN	MO	1259208785	SPECIES	Theobroma	guianense		Theobroma guianense (Aubl.) J.F.Gmel.	Gentry, A.H.	49108	16/11/84	-1.5	-47.98333	1259208785	04/12/20
03/08/20	6139	GBIF	PRESERVED_SPECIMEN	US	1319109494	SPECIES	Herrania	pulcherrima		Herrania pulcherrima Goudot	Jaramillo, J.L.	202	02/09/42	5.248623	-74.29033	1318682259	14/12/20
03/08/20	2209	GBIF	PRESERVED_SPECIMEN	COL	2013769534	SPECIES	Herrania	nitida		Herrania nitida (Poepp.) R.E.Schult.	Duque-Jaramillo, J.M.	2507	02/01/45	-3.53	-70.05	2013769534	07/04/21
03/08/20	10789	GBIF	PRESERVED_SPECIMEN	MO	1259205113	SPECIES	Theobroma	gileri		Theobroma gileri Cuatrec.	Werff, H.; et al.	12059	27/06/91	0.88333	-78.48333	1259205113	21/09/20
03/08/20	5961	GBIF	PRESERVED_SPECIMEN	US	1319702418	SPECIES	Herrania	nitida		Herrania nitida (Poepp.) R.E.Schult.	Vasquez, R. & Jaramillo, N.	11692	19/02/89	-3.4667	-72.8333	1319702418	07/06/21
03/08/20	11251	GBIF	PRESERVED_SPECIMEN	MO	1259173784	SPECIES	Herrania	nitida		Herrania nitida (Poepp.) R.E.Schult.	Vasquez, R. & Jaramillo, N.	11692	19/02/89	-3.46666	-72.83333	1319702418	04/12/20
03/08/20	10816	GBIF	PRESERVED_SPECIMEN	MO	1259204093	SPECIES	Herrania	nitida		Herrania nitida (Poepp.) R.E.Schult.	Lawesson, J.E.; et al.	39300	30/05/82	-0.51666	-76.38333	1317336353	04/12/20
03/08/20	6448	GBIF	PRESERVED_SPECIMEN	US	1317915322	SPECIES	Theobroma	guianense		Theobroma guianense (Aubl.) J.F.Gmel.	R. VÃ¡squez & N. Jaramillo	6226	19/02/85	-3.8	-73.35	1317915322	02/04/21
03/08/20	10822	GBIF	PRESERVED_SPECIMEN	MO	1259203936	SPECIES	Herrania	nitida		Herrania nitida (Poepp.) R.E.Schult.	Holm-Nielsen, L.B.; et al.	22663	24/03/80	-1.41666	-77.03333	2515155463	04/12/20
03/08/20	10848	GBIF	PRESERVED_SPECIMEN	MO	1259203188	SPECIES	Theobroma	obovatum		Theobroma obovatum Klotzsch ex Bernoulli	Gentry, A.H.; et al.	42173	26/06/83	-3.4666667	-72.8333333	1228344352	04/12/20
03/08/20	10942	GBIF	PRESERVED_SPECIMEN	MO	1259197430	SPECIES	Herrania	balaensis		Herrania balaensis Preuss	Zarucchi, J.L.; et al.	5050	27/03/87	7.216667	-76.433333	931005105	12/11/20
03/08/20	10947	GBIF	PRESERVED_SPECIMEN	MO	1259196186	SPECIES	Theobroma	obovatum		Theobroma obovatum Klotzsch ex Bernoulli	Foster, R.B.	8740	12/09/82	-9.3	-74.95	1228311227	30/09/20
03/08/20	10216	GBIF	PRESERVED_SPECIMEN	MO	1260702050	SPECIES	Theobroma	glaucum		Theobroma glaucum H.Karst.	Lugo, H.	5594	23/08/79	-1.733333	-77.483333	1228295420	21/08/20
03/08/20	10978	GBIF	PRESERVED_SPECIMEN	MO	1259192668	SPECIES	Herrania	albiflora		Herrania albiflora Goudot	Espina, J.; et al.	2632	17/04/89	6.092978	-77.387498	931011559	04/12/20
03/08/20	40	GBIF	PRESERVED_SPECIMEN	FMB	2651532319	SPECIES	Theobroma	glaucum		Theobroma glaucum H.Karst.	Aguilar-Cano, J. & Mendoza, H.	JAC-5708	23/07/19	0.431444	-77.090525		02/09/20
03/08/20	10995	GBIF	PRESERVED_SPECIMEN	MO	1259189919	SPECIES	Herrania	mariae		Herrania mariae (Mart.) Decne. ex Goudot	Neill, D.A.; et al.	8081	11/12/87	-0.66666	-77.66666	1259189919	04/12/20
03/08/20	11009	GBIF	PRESERVED_SPECIMEN	MO	1259188938	SPECIES	Theobroma	obovatum		Theobroma obovatum Klotzsch ex Bernoulli	Camilo Diaz, S. & Aronson, J.	DAZSANTIBEZA-732	05/12/78	-8.75	-75.0833333	1228329716	30/09/20
03/08/20	14502	GBIF	PRESERVED_SPECIMEN	HUA	931012586	SPECIES	Herrania	albiflora		Herrania albiflora Goudot	RamÃ­rez, J.G. & CÃ¡rdenas, D.	235	04/12/86	6	-74.783333	1898883173	09/11/20
03/08/20	11070	GBIF	PRESERVED_SPECIMEN	MO	1259184902	SPECIES	Theobroma	obovatum		Theobroma obovatum Klotzsch ex Bernoulli	Smith, D.N.	1318	14/04/82	-9.5166667	-74.9666667	1228267378	04/12/20
03/08/20	2224	GBIF	PRESERVED_SPECIMEN	COL	2013769155	SPECIES	Herrania	nitida		Herrania nitida (Poepp.) R.E.Schult.	Duque-Jaramillo, J.M.	4405A	15/01/47	3.5539419	-76.2521852	2013769155	07/04/21
03/08/20	11142	GBIF	PRESERVED_SPECIMEN	MO	1259179351	SPECIES	Theobroma	obovatum		Theobroma obovatum Klotzsch ex Bernoulli	Juan Celedonia, M.	1187	10/04/88	-4.1666667	-73.5	1228501543	28/09/20
03/08/20	11151	GBIF	PRESERVED_SPECIMEN	MO	1259178881	SPECIES	Herrania	nitida		Herrania nitida (Poepp.) R.E.Schult.	Rudas, A.; et al.	3009	21/08/91	-3.39959	-70.14192	1259178881	04/12/20
03/08/20	11161	GBIF	PRESERVED_SPECIMEN	MO	1259178485	SPECIES	Theobroma	microcarpum		Theobroma microcarpum Mart.	Rudas, A.; et al.	1426	01/03/91	-3.73333	-70.25	1707505848	17/09/20
03/08/20	11164	GBIF	PRESERVED_SPECIMEN	MO	1259178348	SPECIES	Theobroma	microcarpum		Theobroma microcarpum Mart.	Rudas, A.; et al.	3777	26/03/92	-3.7	-70.25	1123883425	17/09/20
03/08/20	11169	GBIF	PRESERVED_SPECIMEN	MO	1259177941	SPECIES	Theobroma	gileri		Theobroma gileri Cuatrec.	Werff, H.; et al.	12059	20/05/87	0.86666	-78.46666	1259205113	21/09/20
03/08/20	14682	GBIF	PRESERVED_SPECIMEN	COAH	768753034	SPECIES	Theobroma	glaucum		Theobroma glaucum H.Karst.	MarÃ­n, C.; et al.	368	14/09/98	-0.15	-74.77	768753034	07/09/20
03/08/20	11183	GBIF	PRESERVED_SPECIMEN	MO	1259177463	SPECIES	Theobroma	obovatum		Theobroma obovatum Klotzsch ex Bernoulli	Rudas, A.; et al.	3064	29/08/91	-3.7833333	-70.25	1259177463	30/09/20
03/08/20	5454	GBIF	PRESERVED_SPECIMEN	US	1321545631	SPECIES	Theobroma	obovatum		Theobroma obovatum Klotzsch ex Bernoulli	VÃ¡squez, R. & Jaramillo, N.	8799	14/01/87	-4.75	-73.6333333	1321545631	05/10/20
03/08/20	5931	GBIF	PRESERVED_SPECIMEN	US	1319777254	SPECIES	Theobroma	glaucum		Theobroma glaucum H.Karst.	Callejas, R.; et al.	8799	19/11/89	7.25	-75.2	1319777254	10/09/20
03/08/20	11276	GBIF	PRESERVED_SPECIMEN	MO	1259172702	SPECIES	Theobroma	obovatum		Theobroma obovatum Klotzsch ex Bernoulli	Vasquez, R. & Jaramillo, N.	9760	12/10/87	-3.3333333	-71.8333333	1228165142	30/09/20
03/08/20	11237	GBIF	PRESERVED_SPECIMEN	MO	1259174771	SPECIES	Theobroma	cirmolinae		Theobroma cirmolinae Cuatrec.	Juncosa, A. & Gomez, F.	40730	25/02/83	3.66666	-76.83333	1258330222	21/10/20
03/08/20	11243	GBIF	PRESERVED_SPECIMEN	MO	1259174075	SPECIES	Theobroma	obovatum		Theobroma obovatum Klotzsch ex Bernoulli	Rudas, A.; et al.	5861	23/07/92	-2.3271726	-70.5338808	1707548427	30/09/20
03/08/20	11249	GBIF	PRESERVED_SPECIMEN	MO	1259173908	SPECIES	Theobroma	obovatum		Theobroma obovatum Klotzsch ex Bernoulli	Gentry, A.H.; et al.	42864	10/07/83	-3.47	-72.83	1228440372	04/12/20
03/08/20	12938	GBIF	PRESERVED_SPECIMEN	COAH	1147293114	SPECIES	Herrania	nycterodendron		Herrania nycterodendron R.E.Schult.	Jaramillo, R.; et al.	7999	01/06/84	-1.18	-69.84	1147293114	07/04/21
03/08/20	4237	GBIF	PRESERVED_SPECIMEN	TOLI	1702875244	SPECIES	Theobroma	glaucum		Theobroma glaucum H.Karst.	Villanueva, B. & Henao, C.I.	3242	22/10/16	7.138367	-74.095117		04/09/20
03/08/20	2724	GBIF	PRESERVED_SPECIMEN	COAH	1932877549	SPECIES	Theobroma	glaucum		Theobroma glaucum H.Karst.	LÃ³pez, R.; et al.	414	22/10/95	2.31	-72.75		04/09/20
03/08/20	13094	GBIF	PRESERVED_SPECIMEN	HUA	1123886398	SPECIES	Theobroma	glaucum		Theobroma glaucum H.Karst.	Velez, J.; et al.	4632	21/11/01	6.394722	-74.536944	1123886398	07/09/20
03/08/20	13002	GBIF	PRESERVED_SPECIMEN	HUAZ	1135159012	SPECIES	Theobroma	glaucum		Theobroma glaucum H.Karst.	Marin, C.; et al.	288	11/09/98	0.155556	-74.777778	768756024	07/09/20
03/08/20	11304	GBIF	PRESERVED_SPECIMEN	MO	1259171770	SPECIES	Theobroma	obovatum		Theobroma obovatum Klotzsch ex Bernoulli	Vasquez, R.	3875	01/03/83	-8.6666667	-74.75	1228288834	30/09/20
03/08/20	11322	GBIF	PRESERVED_SPECIMEN	MO	1259171115	SPECIES	Herrania	nitida		Herrania nitida (Poepp.) R.E.Schult.	VÃ¡squez, R.; et al.	2352	11/08/81	-4.53333	-74.5	1228374583	04/12/20
03/08/20	11330	GBIF	PRESERVED_SPECIMEN	MO	1259170906	SPECIES	Theobroma	obovatum		Theobroma obovatum Klotzsch ex Bernoulli	Gentry, A.H.; et al.	42647	06/07/83	-3.25	-72.9166667	1228420959	29/09/20
03/08/20	13055	GBIF	PRESERVED_SPECIMEN	HUA	1123907155	SPECIES	Theobroma	glaucum		Theobroma glaucum H.Karst.	Soejarto, D.D.; et al.	4470	20/02/76	7.312794	-75.054586	1123907155	07/09/20
03/08/20	13029	GBIF	PRESERVED_SPECIMEN	HUA	1123914672	SPECIES	Theobroma	glaucum		Theobroma glaucum H.Karst.	Marulanda, O. & Marquez, S.	1127	10/08/89	2.216667	-72.55	1123914672	07/09/20
03/08/20	11377	GBIF	PRESERVED_SPECIMEN	MO	1259153760	SPECIES	Theobroma	obovatum		Theobroma obovatum Klotzsch ex Bernoulli	Grandez, C.A.	4143	22/04/92	-3.5	-72.9666667	694272921	02/10/20
03/08/20	14693	GBIF	PRESERVED_SPECIMEN	COAH	768750254	SPECIES	Theobroma	guianense		Theobroma guianense (Aubl.) J.F.Gmel.	CÃ¡rdenas, D.; et al.	7626	21/11/95	0.11	-72.11	768750254	28/12/20
03/08/20	14691	GBIF	PRESERVED_SPECIMEN	COAH	768750499	SPECIES	Theobroma	guianense		Theobroma guianense (Aubl.) J.F.Gmel.	CÃ¡rdenas, D.; et al.	11749	13/12/99	1.06	-76.62	768750499	28/12/20
03/08/20	4124	GBIF	PRESERVED_SPECIMEN	FMB	1707551198	SPECIES	Theobroma	glaucum		Theobroma glaucum H.Karst.	Calixto, A.	161	02/04/94	2.1475157	-74.0684094	1707551198	04/09/20
03/08/20	11474	GBIF	PRESERVED_SPECIMEN	MO	1258735414	SUBSPECIES	Theobroma	glaucum	Theobroma asclepiadiflorum; Theobroma bernoullii subsp. asclepiadiflorum	Theobroma glaucum H.Karst.	Wedel, H.	1535	08/11/40	9.245	-82.38333	1258735414	25/03/21
03/08/20	11551	GBIF	PRESERVED_SPECIMEN	MO	1258539868	SPECIES	Herrania	nitida		Herrania nitida (Poepp.) R.E.Schult.	Dewalt, S.	49	19/03/95	-13.983333	-67.983333	1321345534	04/12/20
03/08/20	11584	GBIF	PRESERVED_SPECIMEN	MO	1258452602	SPECIES	Herrania	kofanorum		Herrania kofanorum R.E.Schult.	Barclay, H.G.	4704	24/07/57	0	0	1258452602	04/12/20
03/08/20	4132	GBIF	PRESERVED_SPECIMEN	FMB	1707548033	SPECIES	Theobroma	glaucum		Theobroma glaucum H.Karst.	Pipoly, J.	16506	19/11/91	-3.783333	-70.25	1707548033	04/09/20
03/08/20	11615	GBIF	PRESERVED_SPECIMEN	MO	1258426783	SPECIES	Herrania	pulcherrima		Herrania pulcherrima Goudot	Acosta-Solis, M.	10923	10/08/45	-0.2538414	-79.1763307	1228228635	04/12/20
03/08/20	11112	GBIF	PRESERVED_SPECIMEN	MO	1259181537	SPECIES	Theobroma	glaucum		Theobroma glaucum H.Karst.	Pipoly, J.	16506	19/11/91	-3.78333	-70.25	1707548033	04/09/20
03/08/20	11638	GBIF	PRESERVED_SPECIMEN	MO	1258383247	SPECIES	Theobroma	guianense		Theobroma guianense (Aubl.) J.F.Gmel.	Jansen-Jacobs, M.J.; et al.	1499	06/09/89	1.65	-58.63333	1265518253	04/12/20
03/08/20	11639	GBIF	PRESERVED_SPECIMEN	MO	1258383243	SPECIES	Theobroma	guianense		Theobroma guianense (Aubl.) J.F.Gmel.	Cid-Ferreira, C.A.; et al.	10876	21/03/92	-8.3	-72.73333	1928105496	04/12/20
03/08/20	11664	GBIF	PRESERVED_SPECIMEN	MO	1258383194	SPECIES	Theobroma	guianense		Theobroma guianense (Aubl.) J.F.Gmel.	Irwin, H.S.; et al.	55196	22/08/63	3.33333	-56.81666	1424167179	04/12/20
03/08/20	12427	GBIF	PRESERVED_SPECIMEN	F	1228544786	SPECIES	Theobroma	speciosum		Theobroma speciosum Willd. ex Spreng.	Capucho, P.	397	30/08/32	-10.8339	-52.8731	1228544786	24/08/20
03/08/20	11708	GBIF	PRESERVED_SPECIMEN	MO	1258381726	SPECIES	Theobroma	obovatum		Theobroma obovatum Klotzsch ex Bernoulli	C. Tello, E.	1816	16/04/91	1.5	-63	1421197213	02/10/20
03/08/20	11711	GBIF	PRESERVED_SPECIMEN	MO	1258381717	SPECIES	Theobroma	obovatum		Theobroma obovatum Klotzsch ex Bernoulli	Gentry, A.H. & Al., E.	36246	12/03/82	-8.75	-75.0333333	1228473913	04/12/20
03/08/20	6565	GBIF	PRESERVED_SPECIMEN	US	1317474427	SPECIES	Theobroma	glaucum		Theobroma glaucum H.Karst.	Espinoza, S.	277	01/09/90	-1.7166667	-76.8166667	1317474427	07/09/20
03/08/20	14669	GBIF	PRESERVED_SPECIMEN	COAH	768757224	SPECIES	Theobroma	guianense		Theobroma guianense (Aubl.) J.F.Gmel.	CÃ¡rdenas, D.; et al.	9932	15/12/98	-2.51	-70.21	768757224	28/12/20
03/08/20	2696	GBIF	PRESERVED_SPECIMEN	COAH	1932885219	SPECIES	Theobroma	glaucum		Theobroma glaucum H.Karst.	CÃ¡rdenas, D.; et al.	47997	17/02/17	1.48	-72.87		04/09/20
03/08/20	5043	GBIF	PRESERVED_SPECIMEN	COAH	1416799372	SPECIES	Theobroma	guianense		Theobroma guianense (Aubl.) J.F.Gmel.	CÃ¡rdenas, D.; et al.	42778	03/07/12	1.21	-70.24	1416799372	28/12/20
03/08/20	14628	GBIF	PRESERVED_SPECIMEN	COAH	768770136	SPECIES	Theobroma	guianense		Theobroma guianense (Aubl.) J.F.Gmel.	CÃ¡rdenas, D.; et al.	19096	26/07/06	1.39	-70.89	768770136	28/12/20
03/08/20	3565	GBIF	PRESERVED_SPECIMEN	COL	1891005660	SPECIES	Theobroma	glaucum		Theobroma glaucum H.Karst.	Cogollo, A.	689	16/08/83	6.0038703	-74.9601253	1891005660	04/09/20
03/08/20	11895	GBIF	PRESERVED_SPECIMEN	MO	1258330246	SPECIES	Theobroma	simiarum		Theobroma simiarum Donn.Sm.	Monsalve, M.B.	571	27/11/84	3.595749	-77.0826739	1258330246	26/10/20
03/08/20	12014	GBIF	PRESERVED_SPECIMEN	MO	1257776939	SPECIES	Theobroma	guianense		Theobroma guianense (Aubl.) J.F.Gmel.	CÃ¡mara-Leret, R.; et al.	1685	18/09/10	-1.06	-70.23	768777402	04/12/20
03/08/20	12016	GBIF	PRESERVED_SPECIMEN	MO	1257771747	SUBSPECIES	Theobroma	glaucum		Theobroma glaucum H.Karst.	Thomas, W.W. & CastaÃ±o, C.	5510	21/07/87	6.9833333	-75.3333333	1317607052	11/09/20
03/08/20	12023	GBIF	PRESERVED_SPECIMEN	MO	1257754367	SPECIES	Theobroma	glaucum		Theobroma glaucum H.Karst.	Aguilar, S.; et al.	559	04/03/98	9.4189	-79.5386	1228608592	14/09/20
03/08/20	12024	GBIF	PRESERVED_SPECIMEN	MO	1257754340	SPECIES	Theobroma	glaucum		Theobroma glaucum H.Karst.	Mireya, D.C.A.; et al.	1840	09/01/73	9.253333	-78.953056	1228601860	14/09/20
03/08/20	12123	GBIF	PRESERVED_SPECIMEN	INB	1253910460	SPECIES	Theobroma	simiarum		Theobroma simiarum Donn.Sm.	Villalobos, N.A.Z.; et al.	s.n.	08/08/12	10.990357	-85.427182		26/10/20
03/08/20	12127	GBIF	PRESERVED_SPECIMEN	INB	1253906557	SPECIES	Herrania	purpurea		Herrania purpurea (Pittier) R.E.Schult.	Hammel, B.; et al.	s.n.	06/03/12	9.020778	-83.515972		11/12/20
03/08/20	12132	GBIF	PRESERVED_SPECIMEN	INB	1253895856	SPECIES	Theobroma	mammosum		Theobroma mammosum Cuatrec. & J.LeÃ³n	Acosta, L.	s.n.	05/10/05	10.191111	-83.857778		02/11/20
03/08/20	12137	GBIF	PRESERVED_SPECIMEN	INB	1253894730	SPECIES	Herrania	purpurea		Herrania purpurea (Pittier) R.E.Schult.	Villalobos, N.A.Z.; et al.	s.n.	24/03/10	9.817194	-83.068333		11/12/20
03/08/20	12146	GBIF	PRESERVED_SPECIMEN	INB	1253883379	SPECIES	Herrania	purpurea		Herrania purpurea (Pittier) R.E.Schult.	Vargas, L.D. & Solano, F.	s.n.	27/06/06	9.794722	-84.5995		11/12/20
03/08/20	12147	GBIF	PRESERVED_SPECIMEN	INB	1253878744	SPECIES	Theobroma	mammosum		Theobroma mammosum Cuatrec. & J.LeÃ³n	Villalobos, N.A.Z.	s.n.	27/08/05	10.433333	-83.983333		02/11/20
03/08/20	12152	GBIF	PRESERVED_SPECIMEN	INB	1253877699	SPECIES	Herrania	purpurea		Herrania purpurea (Pittier) R.E.Schult.	Vargas, L.D. & Blanco, J.	s.n.	02/02/04	9.771667	-84.607972		11/12/20
03/08/20	12154	GBIF	PRESERVED_SPECIMEN	INB	1253877369	SPECIES	Herrania	purpurea		Herrania purpurea (Pittier) R.E.Schult.	Vargas, L.D. & Blanco, J.	s.n.	06/10/03	9.8	-84.591667		11/12/20
03/08/20	12157	GBIF	PRESERVED_SPECIMEN	INB	1253870997	SPECIES	Herrania	purpurea		Herrania purpurea (Pittier) R.E.Schult.	Gonzalez, A.F.R.	s.n.	26/05/07	10.441667	-84.619444		11/12/20
03/08/20	12158	GBIF	PRESERVED_SPECIMEN	INB	1253868629	SPECIES	Herrania	purpurea		Herrania purpurea (Pittier) R.E.Schult.	Vargas, L.D.; et al.	s.n.	08/04/08	9.798	-84.583944		11/12/20
03/08/20	12161	GBIF	PRESERVED_SPECIMEN	INB	1253866268	SPECIES	Theobroma	mammosum		Theobroma mammosum Cuatrec. & J.LeÃ³n	Hammel, B.; et al.	s.n.	12/04/08	9.825	-83.063889		02/11/20
03/08/20	12168	GBIF	PRESERVED_SPECIMEN	INB	1253859064	SPECIES	Theobroma	mammosum		Theobroma mammosum Cuatrec. & J.LeÃ³n	Gonzalez, A.F.R. & Aguilar, R.	s.n.	05/02/04	10.433333	-84.008333		02/11/20
03/08/20	12185	GBIF	PRESERVED_SPECIMEN	INB	1253821665	SPECIES	Herrania	purpurea		Herrania purpurea (Pittier) R.E.Schult.	Solano, D. & Hernandez, B.	s.n.	26/05/04	10.663056	-84.202778		11/12/20
03/08/20	12196	GBIF	PRESERVED_SPECIMEN	INB	1253802169	SPECIES	Theobroma	simiarum		Theobroma simiarum Donn.Sm.	Santamaria, D. & Solano, D.	s.n.	14/01/05	10.686111	-84.180556		26/10/20
03/08/20	12201	GBIF	PRESERVED_SPECIMEN	INB	1253780533	SPECIES	Herrania	purpurea		Herrania purpurea (Pittier) R.E.Schult.	Solano, D.	s.n.	06/12/03	9.413921	-84.157427		11/12/20
03/08/20	12210	GBIF	PRESERVED_SPECIMEN	INB	1253761596	SPECIES	Herrania	purpurea		Herrania purpurea (Pittier) R.E.Schult.	Chavarria, U. & Gonzalez, J.	s.n.	22/06/01	9.883366	-85.061358		11/12/20
03/08/20	12211	GBIF	PRESERVED_SPECIMEN	INB	1253759054	SPECIES	Herrania	purpurea		Herrania purpurea (Pittier) R.E.Schult.	Quiros, J.F.M.	s.n.	25/01/01	9.825	-83.063889		11/12/20
03/08/20	12215	GBIF	PRESERVED_SPECIMEN	INB	1253754417	SPECIES	Theobroma	simiarum		Theobroma simiarum Donn.Sm.	Acosta, L.; et al.	s.n.	09/06/00	8.672538	-83.244148		26/10/20
03/08/20	12217	GBIF	PRESERVED_SPECIMEN	INB	1253739513	SPECIES	Herrania	purpurea		Herrania purpurea (Pittier) R.E.Schult.	Acosta, L. & Ramirez, V.	s.n.	29/03/00	9.805556	-84.580556		11/12/20
03/08/20	12223	GBIF	PRESERVED_SPECIMEN	INB	1253727751	SPECIES	Theobroma	mammosum		Theobroma mammosum Cuatrec. & J.LeÃ³n	Moraga, C.	s.n.	11/07/98	10.978593	-85.430343		02/11/20
03/08/20	12228	GBIF	PRESERVED_SPECIMEN	INB	1253722390	SPECIES	Herrania	purpurea		Herrania purpurea (Pittier) R.E.Schult.	Mora, E.	s.n.	17/05/00	9.991667	-83.377778		11/12/20
03/08/20	12231	GBIF	PRESERVED_SPECIMEN	INB	1253709030	SPECIES	Theobroma	simiarum		Theobroma simiarum Donn.Sm.	Gentry, A.H.	s.n.	06/01/93	10.433333	-84.01667		26/10/20
03/08/20	12238	GBIF	PRESERVED_SPECIMEN	INB	1253699240	SPECIES	Herrania	purpurea		Herrania purpurea (Pittier) R.E.Schult.	Robles, R.	s.n.	04/02/89	10.35	-83.4		11/12/20
03/08/20	12239	GBIF	PRESERVED_SPECIMEN	INB	1253698771	SPECIES	Herrania	purpurea		Herrania purpurea (Pittier) R.E.Schult.	Robles, R.	s.n.	07/03/88	10.4	-83.55		11/12/20
03/08/20	12244	GBIF	PRESERVED_SPECIMEN	INB	1253695089	SPECIES	Herrania	purpurea		Herrania purpurea (Pittier) R.E.Schult.	Kernan, C.	s.n.	09/08/88	8.466667	-83.583336		11/12/20
03/08/20	12248	GBIF	PRESERVED_SPECIMEN	INB	1253691317	SPECIES	Herrania	purpurea		Herrania purpurea (Pittier) R.E.Schult.	Herrera, G.	s.n.	14/04/88	10.983333	-85.116667		11/12/20
03/08/20	12250	GBIF	PRESERVED_SPECIMEN	INB	1253690761	SPECIES	Theobroma	simiarum		Theobroma simiarum Donn.Sm.	Herrera, G.	s.n.	04/11/87	10.916667	-85.333334		26/10/20
03/08/20	12252	GBIF	PRESERVED_SPECIMEN	INB	1253689774	SPECIES	Theobroma	simiarum		Theobroma simiarum Donn.Sm.	Hammel, B.	s.n.	14/02/91	9.641667	-82.763889		26/10/20
03/08/20	12254	GBIF	PRESERVED_SPECIMEN	INB	1253681736	SPECIES	Herrania	purpurea		Herrania purpurea (Pittier) R.E.Schult.	Gonzalez, A.F.R. & Gonzalez, J.	s.n.	24/06/98	9.671035	-83.026147		11/12/20
03/08/20	12258	GBIF	PRESERVED_SPECIMEN	INB	1253677793	SPECIES	Theobroma	mammosum		Theobroma mammosum Cuatrec. & J.LeÃ³n	Mora, E.	s.n.	05/05/99	9.990278	-83.441667		02/11/20
03/08/20	12264	GBIF	PRESERVED_SPECIMEN	INB	1253667448	SPECIES	Theobroma	mammosum		Theobroma mammosum Cuatrec. & J.LeÃ³n	Acosta, L.	s.n.	18/11/99	10.197778	-83.856667		02/11/20
03/08/20	12268	GBIF	PRESERVED_SPECIMEN	INB	1253656472	SPECIES	Herrania	purpurea		Herrania purpurea (Pittier) R.E.Schult.	Gonzalez, A.F.R. & Ramirez, V.	s.n.	30/05/97	9.641667	-82.719444		11/12/20
03/08/20	12275	GBIF	PRESERVED_SPECIMEN	INB	1253653759	SPECIES	Herrania	purpurea		Herrania purpurea (Pittier) R.E.Schult.	Gonzalez, J.; et al.	s.n.	16/01/97	9.575	-82.666667		11/12/20
03/08/20	12277	GBIF	PRESERVED_SPECIMEN	INB	1253653303	SPECIES	Theobroma	simiarum		Theobroma simiarum Donn.Sm.	Quiros, J.F.M.	s.n.	30/12/97	9.433333	-84.005556		26/10/20
03/08/20	12281	GBIF	PRESERVED_SPECIMEN	INB	1253646187	SPECIES	Herrania	purpurea		Herrania purpurea (Pittier) R.E.Schult.	Gentry, A.H.	s.n.	03/04/93	9.75	-84.533333		11/12/20
03/08/20	12283	GBIF	PRESERVED_SPECIMEN	INB	1253643682	SPECIES	Herrania	purpurea		Herrania purpurea (Pittier) R.E.Schult.	Aguilar, R.	s.n.	23/07/94	8.480556	-83.591667		11/12/20
03/08/20	12284	GBIF	PRESERVED_SPECIMEN	INB	1253641870	SPECIES	Theobroma	simiarum		Theobroma simiarum Donn.Sm.	Araya, F.	s.n.	09/03/93	10.641667	-84.004167		26/10/20
03/08/20	12286	GBIF	PRESERVED_SPECIMEN	INB	1253635575	SPECIES	Theobroma	simiarum		Theobroma simiarum Donn.Sm.	Hammel, B.	s.n.	22/10/94	10.172778	-83.908889		26/10/20
03/08/20	12287	GBIF	PRESERVED_SPECIMEN	INB	1253634330	SPECIES	Herrania	purpurea		Herrania purpurea (Pittier) R.E.Schult.	Fernandez, A.	s.n.	11/12/93	9.672222	-83.05		11/12/20
03/08/20	12288	GBIF	PRESERVED_SPECIMEN	INB	1253634144	SPECIES	Theobroma	mammosum		Theobroma mammosum Cuatrec. & J.LeÃ³n	Araya, F.	s.n.	25/06/94	10.643889	-83.736111		02/11/20
03/08/20	12289	GBIF	PRESERVED_SPECIMEN	INB	1253626863	SPECIES	Herrania	purpurea		Herrania purpurea (Pittier) R.E.Schult.	Haber, W.	s.n.	09/12/93	10.45	-84.5		11/12/20
03/08/20	12290	GBIF	PRESERVED_SPECIMEN	INB	1253626658	SPECIES	Theobroma	mammosum		Theobroma mammosum Cuatrec. & J.LeÃ³n	Haber, W.	s.n.	09/12/93	10.45	-84.5		02/11/20
03/08/20	12292	GBIF	PRESERVED_SPECIMEN	INB	1253622799	SPECIES	Theobroma	simiarum		Theobroma simiarum Donn.Sm.	Quiros, J.F.M.	s.n.	21/10/95	9.745833	-82.819444		26/10/20
03/08/20	12293	GBIF	PRESERVED_SPECIMEN	INB	1253621434	SPECIES	Herrania	purpurea		Herrania purpurea (Pittier) R.E.Schult.	Aguilar, R.	s.n.	08/07/95	10.441667	-83.788889		11/12/20
03/08/20	12297	GBIF	PRESERVED_SPECIMEN	INB	1253604595	SPECIES	Herrania	purpurea		Herrania purpurea (Pittier) R.E.Schult.	Fernandez, A.	s.n.	06/12/92	9.613889	-82.668056		11/12/20
03/08/20	12298	GBIF	PRESERVED_SPECIMEN	INB	1253604551	SPECIES	Theobroma	simiarum		Theobroma simiarum Donn.Sm.	Fernandez, A.	s.n.	28/12/92	9.151389	-83.725		26/10/20
03/08/20	12300	GBIF	PRESERVED_SPECIMEN	INB	1253601079	SPECIES	Theobroma	mammosum		Theobroma mammosum Cuatrec. & J.LeÃ³n	Quiros, J.F.M.	s.n.	14/11/93	9.7	-84.333334		02/11/20
03/08/20	12301	GBIF	PRESERVED_SPECIMEN	INB	1253598806	SPECIES	Theobroma	simiarum		Theobroma simiarum Donn.Sm.	Bello, E.	s.n.	24/06/91	10.316667	-84.716668		26/10/20
03/08/20	12302	GBIF	PRESERVED_SPECIMEN	INB	1253597268	SPECIES	Herrania	purpurea		Herrania purpurea (Pittier) R.E.Schult.	Carballo, G.	s.n.	15/03/91	9.675	-83.022222		11/12/20
03/08/20	12303	GBIF	PRESERVED_SPECIMEN	INB	1253596447	SPECIES	Theobroma	mammosum		Theobroma mammosum Cuatrec. & J.LeÃ³n	Bello, E.	s.n.	26/09/89	10.35	-84.666667		02/11/20
03/08/20	12305	GBIF	PRESERVED_SPECIMEN	INB	1253596432	SPECIES	Herrania	purpurea		Herrania purpurea (Pittier) R.E.Schult.	Jimenez, Q.; et al.	s.n.	05/04/93	9.775	-84.533333		11/12/20
03/08/20	12308	GBIF	PRESERVED_SPECIMEN	INB	1253596392	SPECIES	Theobroma	simiarum		Theobroma simiarum Donn.Sm.	Aguilar, R.	s.n.	06/12/91	8.7	-83.525		26/10/20
03/08/20	12309	GBIF	PRESERVED_SPECIMEN	INB	1253578544	SPECIES	Theobroma	simiarum		Theobroma simiarum Donn.Sm.	Aguilar, R.	s.n.	16/01/97	8.481076	-83.595012		26/10/20
03/08/20	3585	GBIF	PRESERVED_SPECIMEN	COL	1890981323	SPECIES	Theobroma	glaucum		Theobroma glaucum H.Karst.	Renteria, A.E.; et al.	1603	16/07/79	7.2477073	-74.658847	1890981323	04/09/20
03/08/20	12315	GBIF	PRESERVED_SPECIMEN	HUCO	1249228543	SPECIES	Herrania	purpurea		Herrania purpurea (Pittier) R.E.Schult.	Idarraga, A. & Cardona, F.	2901	//	8.409167	-77.141667		09/12/20
03/08/20	12324	GBIF	PRESERVED_SPECIMEN	F	1228633298	SPECIES	Theobroma	guianense		Theobroma guianense (Aubl.) J.F.Gmel.	Villa, G. & Velez, L.	900	14/02/01	-0.6333333	-76.5	1228633298	02/04/21
03/08/20	12328	GBIF	PRESERVED_SPECIMEN	F	1228627947	SPECIES	Theobroma	guianense		Theobroma guianense (Aubl.) J.F.Gmel.	Foster, R.B. & d'Achille, B.	10081	11/05/85	-10.3166667	-75.2666667	1228627947	02/04/21
03/08/20	12333	GBIF	PRESERVED_SPECIMEN	F	1228621370	SPECIES	Herrania	nitida		Herrania nitida (Poepp.) R.E.Schult.	Madison, M.T.	5383	17/06/78	-0.4116475	-76.6253865	1228621370	01/06/21
03/08/20	12334	GBIF	PRESERVED_SPECIMEN	F	1228619163	SPECIES	Theobroma	guianense		Theobroma guianense (Aubl.) J.F.Gmel.	Aublet, J.B.C.F.	s.n.	//	3.8558	-52.9708	1228619163	12/04/21
03/08/20	12360	GBIF	PRESERVED_SPECIMEN	F	1228601860	SPECIES	Theobroma	glaucum		Theobroma glaucum H.Karst.	Correa, M.D.; et al.	1840	09/01/73	8.4833	-78.5	1228601860	14/09/20
03/08/20	12372	GBIF	PRESERVED_SPECIMEN	F	1228590747	SPECIES	Herrania	nitida		Herrania nitida (Poepp.) R.E.Schult.	Williams, L.	3364	/9-10/1929	-9.1839	-74.14	1228590747	01/06/21
03/08/20	12409	GBIF	PRESERVED_SPECIMEN	F	1228560010	SPECIES	Theobroma	speciosum		Theobroma speciosum Willd. ex Spreng.	Foster, R.B.	3192	19/08/76	-12	-70.25		21/08/20
03/08/20	12418	GBIF	PRESERVED_SPECIMEN	F	1228551086	SPECIES	Herrania	nitida		Herrania nitida (Poepp.) R.E.Schult.	Foster, R.B.	3194	20/08/76	-12	-70.25		01/06/21
03/08/20	12438	GBIF	PRESERVED_SPECIMEN	F	1228536803	SPECIES	Theobroma	simiarum		Theobroma simiarum Donn.Sm.	Lent, R.W.	3357	19/04/73	10.0114	-83.9519		26/10/20
03/08/20	12458	GBIF	PRESERVED_SPECIMEN	F	1228521200	SPECIES	Herrania	balaensis		Herrania balaensis Preuss	Rimbach, A.	48	//	-1.4628	-78.1869	1228521200	14/05/21
03/08/20	12480	GBIF	PRESERVED_SPECIMEN	F	1228500804	SPECIES	Herrania	lemniscata		Herrania lemniscata (Schomb.) R.E.Schult.	Steyermark, J.A.	60558	25/11/44	5.58585	-61.76063	1228210563	10/11/20
03/08/20	13301	GBIF	PRESERVED_SPECIMEN	CEN	1095251737	SPECIES	Theobroma	speciosum		Theobroma speciosum Willd. ex Spreng.	Pereira-Silva, G.	13599	17/07/08	-9.228889	-64.64	1095251737	24/08/20
03/08/20	13305	GBIF	PRESERVED_SPECIMEN	CEN	1095208339	SPECIES	Theobroma	speciosum		Theobroma speciosum Willd. ex Spreng.	Skorupa, L.A.; et al.	841	02/06/90	-9.76	-63.09	1095208339	24/08/20
03/08/20	13747	GBIF	PRESERVED_SPECIMEN	CEPEC	1090425072	SPECIES	Theobroma	speciosum	Theobroma speciosa	Theobroma speciosum Willd. ex Spreng.	Garcia-Barriga, H.	5	05/05/87	-9.8545765	-69.4388263	1090425072	24/08/20
03/08/20	12511	GBIF	PRESERVED_SPECIMEN	F	1228471905	SPECIES	Theobroma	gileri		Theobroma gileri Cuatrec.	Solis, M.A.	12423	11/05/20	-1.4628	-78.1869		21/09/20
03/08/20	14494	GBIF	PRESERVED_SPECIMEN	HUA	931018212	SPECIES	Herrania	albiflora		Herrania albiflora Goudot	Renteria, E.; et al.	2372	20/06/80	7.2866	-74.595	1890995561	09/11/20
03/08/20	12522	GBIF	PRESERVED_SPECIMEN	F	1228463174	SPECIES	Theobroma	guianense		Theobroma guianense (Aubl.) J.F.Gmel.	Gentry, A.H.; et al.	80587	28/07/93	-4.25	-78.8333	1228463174	17/03/21
03/08/20	13748	GBIF	PRESERVED_SPECIMEN	CEPEC	1090425058	SPECIES	Theobroma	speciosum		Theobroma speciosum Willd. ex Spreng.	Lima, J.; et al.	486	11/05/79	-9.4390663	-68.7349509	1090425058	24/08/20
03/08/20	6477	GBIF	PRESERVED_SPECIMEN	US	1317821796	SPECIES	Theobroma	glaucum		Theobroma glaucum H.Karst.	Cornejo, X.F.	7484	15/03/02	-0.03	-70.15		07/09/20
03/08/20	12548	GBIF	PRESERVED_SPECIMEN	F	1228439827	SPECIES	Theobroma	guianense		Theobroma guianense (Aubl.) J.F.Gmel.	Gentry, A.H.	41585	07/06/83	-10.2921569	-74.9799175		02/04/21
03/08/20	12555	GBIF	PRESERVED_SPECIMEN	F	1228434029	SPECIES	Herrania	mariae		Herrania mariae (Mart.) Decne. ex Goudot	Foster, R.B.	7086	30/09/79	-12	-70.25	1228434029	04/05/21
03/08/20	12581	GBIF	PRESERVED_SPECIMEN	F	1228413573	SPECIES	Theobroma	speciosum		Theobroma speciosum Willd. ex Spreng.	Toledo, M.	61	13/08/92	-17.5	-61.5		24/08/20
03/08/20	13131	GBIF	PRESERVED_SPECIMEN	HUA	1123881085	SPECIES	Theobroma	glaucum		Theobroma glaucum H.Karst.	Idrobo, J.M.	8418	09/11/75	3.01759	-74.20894	1123881085	08/03/21
03/08/20	13804	GBIF	PRESERVED_SPECIMEN	R	1086999408	SPECIES	Theobroma	speciosum		Theobroma speciosum Willd. ex Spreng.	Glaziou, A.F.M.	9633	10/1/1876	-22.903692	-43.229852	694767676	24/08/20
03/08/20	13866	GBIF	PRESERVED_SPECIMEN	ALCB	1077184363	SPECIES	Theobroma	speciosum	Theobroma spruceanum	Theobroma speciosum Willd. ex Spreng.	Froes, H.L.	26526	03/09/50	-3.2890407	-62.9727701	1077184363	13/04/21
03/08/20	12609	GBIF	PRESERVED_SPECIMEN	F	1228390011	SPECIES	Herrania	albiflora		Herrania albiflora Goudot	Goudot, J.D.	s.n.	//1844	5.27306	-73.29417	1228390011	09/11/20
03/08/20	13990	GBIF	PRESERVED_SPECIMEN	INPA	1042705809	SPECIES	Theobroma	speciosum		Theobroma speciosum Willd. ex Spreng.	Nogueira, C.L.B.; et al.	172	16/11/09	-4.0944897	-63.1446104	1042705809	13/04/21
03/08/20	12624	GBIF	PRESERVED_SPECIMEN	F	1228377374	SPECIES	Herrania	amazonica		Herrania amazonica Huber	Ducke, A.	s.n.	26/08/06	0	0		17/11/20
03/08/20	12640	GBIF	PRESERVED_SPECIMEN	F	1228362038	SPECIES	Herrania	mariae	Theobroma sagittata	Herrania mariae (Mart.) Decne. ex Goudot	PavÃ³n, J.A.	36	//1827	-9.1839	-74.14	1228362038	17/05/21
03/08/20	12642	GBIF	PRESERVED_SPECIMEN	F	1228358937	SPECIES	Herrania	nitida		Herrania nitida (Poepp.) R.E.Schult.	Foster, R.B.	11399	17/09/86	-11.8833333	-71.3833333	1228358937	02/06/21
03/08/20	759	GBIF	PRESERVED_SPECIMEN	L	2516855674	SPECIES	Herrania	nitida		Herrania nitida (Poepp.) R.E.Schult.	Dulmen, A. & Matapi, N.	14	18/10/90	-0.633333	-72.25	2516855674	13/05/21
03/08/20	14034	GBIF	PRESERVED_SPECIMEN	INPA	1042688526	SPECIES	Theobroma	speciosum		Theobroma speciosum Willd. ex Spreng.	Prata, E.M.B.; et al.	492	11/09/10	-6.6625	-62.9841667	1042688526	01/09/20
03/08/20	12687	GBIF	PRESERVED_SPECIMEN	F	1228327913	SPECIES	Herrania	mariae		Herrania mariae (Mart.) Decne. ex Goudot	Plowman, T.C.; et al.	6565	02/04/77	-3.0833333	-71.9166667	1228327913	17/05/21
03/08/20	14035	GBIF	PRESERVED_SPECIMEN	INPA	1042688270	SPECIES	Theobroma	speciosum		Theobroma speciosum Willd. ex Spreng.	Prata, E.M.B.; et al.	326	02/09/10	-6.50644	-64.55	1042688270	13/04/21
03/08/20	14036	GBIF	PRESERVED_SPECIMEN	INPA	1042688215	SPECIES	Theobroma	speciosum		Theobroma speciosum Willd. ex Spreng.	Prata, E.M.B.; et al.	223	29/08/10	-6.6786111	-64.6119444	1042688215	24/08/20
03/08/20	12718	GBIF	PRESERVED_SPECIMEN	F	1228298570	SPECIES	Herrania	nitida		Herrania nitida (Poepp.) R.E.Schult.	GÃ³mez, R.F.; et al.	6110	12/06/96	7.4375588	-77.1133348	1228298570	02/06/21
03/08/20	12727	GBIF	PRESERVED_SPECIMEN	F	1228292012	SPECIES	Herrania	mariae		Herrania mariae (Mart.) Decne. ex Goudot	Gentry, A.H.; et al.	27462	05/11/79	-3.8101252	-72.8042797	1228292012	07/05/21
03/08/20	12731	GBIF	PRESERVED_SPECIMEN	F	1228287611	SPECIES	Theobroma	obovatum		Theobroma obovatum Klotzsch ex Bernoulli	Gentry, A.H.; et al.	24970	24/02/79	-3.8333333	-73.5		30/09/20
03/08/20	12737	GBIF	PRESERVED_SPECIMEN	F	1228280200	SPECIES	Theobroma	glaucum		Theobroma glaucum H.Karst.	Correa, M.D.; et al.	1840	09/01/73	9.2533	-78.9531	1228601860	14/09/20
03/08/20	12773	GBIF	PRESERVED_SPECIMEN	F	1228248271	SPECIES	Herrania	nitida		Herrania nitida (Poepp.) R.E.Schult.	Davis, E.W. Yost, J.	1030	27/04/81	-1.3333333	-77.6666667	1228248271	02/06/21
03/08/20	12781	GBIF	PRESERVED_SPECIMEN	F	1228238865	SPECIES	Herrania	mariae		Herrania mariae (Mart.) Decne. ex Goudot	Vega, I.M.S. & Dillon, M.O.	8582	09/11/96	-5.7	-77.4	1228238865	05/05/21
03/08/20	585	GBIF	PRESERVED_SPECIMEN	U	2517635067	SPECIES	Theobroma	velutinum		Theobroma velutinum Benoist	Lindeman, J.C.	6034	01/06/54	5.60942	-54.35377	1319373188	10/08/20
03/08/20	12721	GBIF	PRESERVED_SPECIMEN	F	1228296060	SPECIES	Herrania	nitida		Herrania nitida (Poepp.) R.E.Schult.	Martius, C.F.P.	s.n.	//	-10.8339	-52.8731		02/06/21
03/08/20	14700	GBIF	PRESERVED_SPECIMEN	COAH	768748314	SPECIES	Theobroma	glaucum		Theobroma glaucum H.Karst.	Posada, A.; et al.	3163	15/10/96	-3.76	-70.55		07/09/20
03/08/20	11735	GBIF	PRESERVED_SPECIMEN	MO	1258381381	SPECIES	Theobroma	glaucum		Theobroma glaucum H.Karst.	Soejarto, D.D.; et al.	4320	6-12/9/1973	7.26941	-75.2065	1228332020	07/09/20
03/08/20	12835	GBIF	PRESERVED_SPECIMEN	F	1228194280	SPECIES	Herrania	laciniifolia		Herrania laciniifolia Goudot ex Triana & Planch.	Goudot, J.D.	s.n.	//1844	3.8811	-72.8667		10/11/20
03/08/20	12842	GBIF	PRESERVED_SPECIMEN	F	1228187200	SPECIES	Herrania	nycterodendron		Herrania nycterodendron R.E.Schult.	Nunes, P.V.	23995	14/10/85	-12.5	-72.5		07/06/21
03/08/20	12873	GBIF	PRESERVED_SPECIMEN	F	1228156782	SPECIES	Theobroma	nemorale		Theobroma nemorale Cuatrec.	Cuatrecasas, J.	16544	28/02/44	4.0724	-77.122	1228156782	30/10/20
03/08/20	14728	GBIF	PRESERVED_SPECIMEN	COAH	768740614	SPECIES	Theobroma	glaucum		Theobroma glaucum H.Karst.	CÃ¡rdenas, D.; et al.	7032	15/01/96	2.65	-71.12	768740614	07/09/20
03/08/20	14110	GBIF	PRESERVED_SPECIMEN	INPA	1042639402	SPECIES	Theobroma	speciosum		Theobroma sylvestre Mart.	Setz, E.Z.P.	272	12/12/90	-2.416667	-59.87	1042639402	13/04/21
03/08/20	12888	GBIF	PRESERVED_SPECIMEN	SPF	1226935676	SPECIES	Theobroma	sylvestre		Theobroma sylvestre Mart.	Oliveira, A.A.	2026	/4/1993	-2.407222	-59.761111	1226935676	13/04/21
03/08/20	12889	GBIF	PRESERVED_SPECIMEN	SPF	1226935584	SPECIES	Theobroma	guianense		Theobroma guianense (Aubl.) J.F.Gmel.	Oliveira, A.A.	1125	/3/1993	-2.407222	-59.761111	1226935584	05/04/21
03/08/20	14117	GBIF	PRESERVED_SPECIMEN	INPA	1042633463	SPECIES	Theobroma	speciosum		Theobroma speciosum Willd. ex Spreng.	Rylands, A.B.	40	08/11/78	-9.8602215	-60.2634065	1042633463	24/08/20
03/08/20	12897	GBIF	PRESERVED_SPECIMEN	UB	1213648944	SPECIES	Theobroma	speciosum		Theobroma speciosum Willd. ex Spreng.	Eiten, G.	temporary306	11/01/77	-8.666667	-54.2		24/08/20
03/08/20	14721	GBIF	PRESERVED_SPECIMEN	COAH	768742608	SPECIES	Herrania	nitida		Herrania nitida (Poepp.) R.E.Schult.	LÃ³pez, H.R.	2970	30/04/97	1.04	-76.63	768742608	07/04/21
03/08/20	12937	GBIF	PRESERVED_SPECIMEN	COAH	1147294340	SPECIES	Herrania	cuatrecasana		Herrania cuatrecasana GarcÃ­a-Barr.	LÃ³pez, H.R.; et al.	2952	30/04/97	1.04	-76.63	1147294340	16/12/20
03/08/20	14720	GBIF	PRESERVED_SPECIMEN	COAH	768742626	SPECIES	Theobroma	guianense		Theobroma guianense (Aubl.) J.F.Gmel.	LÃ³pez, H.R.; et al.	2731	24/04/97	1.07	-76.64	768742626	28/12/20
03/08/20	14718	GBIF	PRESERVED_SPECIMEN	COAH	768743926	SPECIES	Herrania	nitida		Herrania nitida (Poepp.) R.E.Schult.	LÃ³pez, R.; et al.	3785	24/04/98	2.45	-72.69	768743926	07/04/21
03/08/20	14717	GBIF	PRESERVED_SPECIMEN	COAH	768743987	SPECIES	Theobroma	guianense		Theobroma guianense (Aubl.) J.F.Gmel.	Idrobo, J.M.	6903	12/03/74	-1.44	-72.79	768743987	28/12/20
03/08/20	14791	GBIF	PRESERVED_SPECIMEN	COAH	768724830	SPECIES	Theobroma	guianense		Theobroma guianense (Aubl.) J.F.Gmel.	Garzon, N.C. & Plazas, O.R.	308	28/11/85	-0.59	-72.36	768724830	28/12/20
03/08/20	14715	GBIF	PRESERVED_SPECIMEN	COAH	768745060	SPECIES	Theobroma	guianense		Theobroma guianense (Aubl.) J.F.Gmel.	Torres, M.; et al.	2404	31/07/97	-1.91	-71.66	768745060	28/12/20
03/08/20	2731	GBIF	PRESERVED_SPECIMEN	COAH	1932876213	SPECIES	Theobroma	obovatum		Theobroma obovatum Klotzsch ex Bernoulli	Torres, M.; et al.	2284	28/07/97	-1.76	-71.46	1932876213	23/09/20
03/08/20	14713	GBIF	PRESERVED_SPECIMEN	COAH	768745072	SPECIES	Theobroma	guianense		Theobroma guianense (Aubl.) J.F.Gmel.	Torres, M.; et al.	2297	28/07/97	-1.76	-71.46	768745072	28/12/20
03/08/20	14614	GBIF	PRESERVED_SPECIMEN	COAH	768778063	SPECIES	Theobroma	guianense		Theobroma guianense (Aubl.) J.F.Gmel.	CÃ¡rdenas, D.; et al.	40714	25/10/10	1.43	-75.88	768778063	28/12/20
03/08/20	14613	GBIF	PRESERVED_SPECIMEN	COAH	768778070	SPECIES	Theobroma	guianense		Theobroma guianense (Aubl.) J.F.Gmel.	CÃ¡rdenas, D.; et al.	40443	16/10/10	1.2	-75.86	768778070	28/12/20
03/08/20	12916	GBIF	PRESERVED_SPECIMEN	COAH	1147304289	SPECIES	Theobroma	guianense		Theobroma guianense (Aubl.) J.F.Gmel.	CÃ¡rdenas, D.; et al.	42411	13/03/12	1.58	-75.94	1891236890	28/12/20
03/08/20	12915	GBIF	PRESERVED_SPECIMEN	COAH	1147304323	SPECIES	Theobroma	glaucum		Theobroma glaucum H.Karst.	CÃ¡rdenas, D.; et al.	42568	14/06/12	2.37	-72.63		07/09/20
03/08/20	12931	GBIF	PRESERVED_SPECIMEN	COAH	1147295339	SPECIES	Theobroma	guianense		Theobroma guianense (Aubl.) J.F.Gmel.	SÃ¡nchez, C.P. & Lima, C.U.	94	17/12/97	1.5	-75.59	1147295339	28/12/20
03/08/20	12930	GBIF	PRESERVED_SPECIMEN	COAH	1147295398	SPECIES	Theobroma	microcarpum		Theobroma microcarpum Mart.	Posada, A. & Cohelo, R.E.	3148	15/10/96	-3.76	-70.54	1147295398	16/09/20
03/08/20	2730	GBIF	PRESERVED_SPECIMEN	COAH	1932876278	SPECIES	Theobroma	obovatum		Theobroma obovatum Klotzsch ex Bernoulli	Posada, A. & Cohelo, R.E.	3170	15/10/96	-3.76	-70.54	1932876278	23/09/20
03/08/20	14706	GBIF	PRESERVED_SPECIMEN	COAH	768747583	SPECIES	Herrania	nitida		Herrania nitida (Poepp.) R.E.Schult.	Posada, A.; et al.	2643	28/09/96	-3.78	-70.56	768747583	07/04/21
03/08/20	14671	GBIF	PRESERVED_SPECIMEN	COAH	768757034	SPECIES	Theobroma	glaucum		Theobroma glaucum H.Karst.	CÃ¡rdenas, D.; et al.	11216	14/03/99	-2.5	-70.22		07/09/20
03/08/20	14703	GBIF	PRESERVED_SPECIMEN	COAH	768747852	SPECIES	Theobroma	guianense		Theobroma guianense (Aubl.) J.F.Gmel.	MartÃ­nez, X.; et al.	1458	01/09/93	1.22	-70.29	768747852	28/12/20
03/08/20	14702	GBIF	PRESERVED_SPECIMEN	COAH	768748212	SPECIES	Theobroma	guianense		Theobroma guianense (Aubl.) J.F.Gmel.	Posada, A.; et al.	2529	30/08/96	-3.76	-70.54	768748212	28/12/20
03/08/20	5049	GBIF	PRESERVED_SPECIMEN	UDBC	1328371346	SPECIES	Theobroma	glaucum		Theobroma glaucum H.Karst.	\sastoque, E.; et al."	295	13/09/14	3.800011	-73.748644	0	04/09/20	Pacific dominion	6665	0	0	1536	71873	1125524	0.7592053	0.802800477	0.108903987	0.005528377	0	0	0.001274057	0.059616058	0.933581509
03/08/20	14699	GBIF	PRESERVED_SPECIMEN	COAH	768748324	SPECIES	Theobroma	obovatum	0	Theobroma obovatum Klotzsch ex Bernoulli	Posada, A.; et al.	2184	22/08/96	-3.68	-70.38	768748324	25/09/20	Imerí province	81176	0	0	55410	328746	740243	0.614404386	0.664611578	0.224985237	0.067333845	0	0	0.045961471	0.272688136	0.614016548
03/08/20	2728	GBIF	PRESERVED_SPECIMEN	COAH	1932876611	SPECIES	Theobroma	obovatum	0	Theobroma obovatum Klotzsch ex Bernoulli	Posada, A.; et al.	2278	27/08/96	-3.68	-70.37	1932876611	23/09/20	Imerí province	17685	0	0	9377	17199	220622	0.734402202	0.852739751	0.281725825	0.066765327	0	0	0.035400535	0.064930554	0.832903584
03/08/20	12952	GBIF	PRESERVED_SPECIMEN	G	1144793974	SPECIES	Theobroma	simiarum	0	Theobroma simiarum Donn.Sm.	Pittier H.F. & Barbey-Boissier, A.T.	s.n.	//	9.78611	-83.68	0	26/10/20	Puntarenas-Chiriquí province	0	0	0	0	0	0	0	0	0	NA	NA	NA	NA	NA	NA
03/08/20	12954	GBIF	PRESERVED_SPECIMEN	G	1144793968	SPECIES	Theobroma	simiarum	0	Theobroma simiarum Donn.Sm.	Pittier H.F. & Barbey-Boissier, A.T.	s.n.	//	9.97028	-84.18806	0	26/10/20	Puntarenas-Chiriquí province	42189	0	0	40889	225674	317425	0.561893669	0.605162919	0.229354603	0.067375518	0	0	0.065299428	0.360399695	0.506925358
03/08/20	12989	GBIF	PRESERVED_SPECIMEN	HUAZ	1135159600	SPECIES	Theobroma	guianense	0	Theobroma guianense (Aubl.) J.F.Gmel.	Perez, K.	499	20/02/10	1.635028	-75.58275	0	17/03/21	Napo province	57396	0	0	17255	58332	686492	0.700566743	0.787740827	0.216154135	0.070039965	0	0	0.021056164	0.071182159	0.837721712
03/08/20	12990	GBIF	PRESERVED_SPECIMEN	HUAZ	1135159595	SPECIES	Herrania	nitida	0	Herrania nitida (Poepp.) R.E.Schult.	Correa, M.D.; et al.	6477	05/10/08	1.473611	-75.549528	0	22/04/21	Napo province	147382	0	0	25484	176828	855630	0.644052284	0.763287425	0.315930606	0.122275836	0	0	0.021142863	0.146705782	0.709875519
03/08/20	12991	GBIF	PRESERVED_SPECIMEN	HUAZ	1135159428	SPECIES	Herrania	nitida	0	Herrania nitida (Poepp.) R.E.Schult.	Correa, M.D.; et al.	4200	04/10/04	1.424167	-75.516111	0	22/04/21	Napo province	147382	0	0	25484	176828	855630	0.644052284	0.763287425	0.315930606	0.122275836	0	0	0.021142863	0.146705782	0.709875519
03/08/20	12994	GBIF	PRESERVED_SPECIMEN	HUAZ	1135159266	SPECIES	Herrania	nycterodendron	0	Herrania nycterodendron R.E.Schult.	Correa, M.D.; et al.	6642	24/11/08	1.445778	-75.686722	0	07/06/21	Napo province	1881	0	0	361	5113	632576	0.815228046	0.829305112	0.069082295	0.002939379	0	0	0.000564123	0.007989924	0.988506573
03/08/20	12996	GBIF	PRESERVED_SPECIMEN	HUAZ	1135159194	SPECIES	Herrania	nitida	0	Herrania nitida (Poepp.) R.E.Schult.	Correa, M.D.; et al.	6038	01/07/08	1.432111	-75.53	0	22/04/21	Napo province	288938	0	0	403645	254701	258278	0.360785055	0.264723927	0.250376921	0.239670793	0	0	0.334818948	0.21127159	0.21423867
03/08/20	12997	GBIF	PRESERVED_SPECIMEN	HUAZ	1135159188	SPECIES	Herrania	nycterodendron	0	Herrania nycterodendron R.E.Schult.	Correa, M.D.; et al.	5577	28/08/07	1.499944	-75.606278	0	07/06/21	Napo province	89310	0	0	176182	209116	608029	0.58049119	0.706547618	0.267010169	0.082493024	0	0	0.162734139	0.193154307	0.56161853
03/08/20	12999	GBIF	PRESERVED_SPECIMEN	HUAZ	1135159082	SPECIES	Theobroma	guianense	0	Theobroma guianense (Aubl.) J.F.Gmel.	Correa, M.D.; et al.	3881	05/02/04	1.606283	-75.5804	0	17/03/21	Napo province	11601	0	0	9460	24408	555908	0.793598664	0.837019086	0.147858337	0.019290728	0	0	0.015730565	0.040586853	0.924391854
03/08/20	13000	GBIF	PRESERVED_SPECIMEN	HUAZ	1135159054	SPECIES	Herrania	nitida	0	Herrania nitida (Poepp.) R.E.Schult.	Marin, C.; et al.	295	11/09/98	0.155556	-74.777778	0	22/04/21	Napo province	11770	0	0	8083	30644	1155104	0.845987059	0.876066804	0.128080398	0.009762766	0	0	0.00670454	0.025418028	0.958114666
03/08/20	13013	GBIF	PRESERVED_SPECIMEN	HUAZ	1135158894	SPECIES	Theobroma	guianense	0	Theobroma guianense (Aubl.) J.F.Gmel.	Trujillo, W.; et al.	189	07/09/06	1.083517	-75.45605	0	17/03/21	Napo province	581	0	0	803	3720	851939	0.87410856	0.878663957	0.04423653	0.000677912	0	0	0.000936942	0.004340506	0.99404464
03/08/20	12929	GBIF	PRESERVED_SPECIMEN	COAH	1147296475	SPECIES	Theobroma	obovatum	0	Theobroma obovatum Klotzsch ex Bernoulli	Ramirez, J.G.; et al.	7192	08/03/00	2.55	-72.74	1147296475	25/09/20	Imerí province	0	0	0	0	0	0	0	0	0	NA	NA	NA	NA	NA	NA
03/08/20	14526	GBIF	PRESERVED_SPECIMEN	HUA	930999872	SPECIES	Herrania	nitida	0	Herrania nitida (Poepp.) R.E.Schult.	Trujillo, P.	6406	05/04/11	5.871681	-74.8501	930999872	09/11/20	Magdalena province	822231	0	0	29923	86483	266780	0.116356153	-0.097701147	0.39572338	0.682113327	0	0	0.024823775	0.071745296	0.221317602
03/08/20	14544	GBIF	PRESERVED_SPECIMEN	HUA	930987491	SPECIES	Herrania	albiflora	0	Herrania albiflora Goudot	VelÃ©z, J.G.; et al.	4540	08/10/01	6.394167	-74.363611	930987491	09/11/20	Magdalena province	822231	0	0	29923	86483	266780	0.116356153	-0.097701147	0.39572338	0.682113327	0	0	0.024823775	0.071745296	0.221317602
03/08/20	14518	GBIF	PRESERVED_SPECIMEN	HUA	931005105	SPECIES	Herrania	nycterodendron	0	Herrania nycterodendron R.E.Schult.	Zarucchi, J.L.; et al.	5050	27/03/87	7.216667	-76.433333	931005105	12/11/20	Cauca province	0	0	0	0	0	0	0	0	0	NA	NA	NA	NA	NA	NA
03/08/20	14532	GBIF	PRESERVED_SPECIMEN	HUA	930993562	SPECIES	Herrania	nitida	0	Herrania nitida (Poepp.) R.E.Schult.	Albert, L.; et al.	2201	08/08/82	5.754684	-76.448746	930993562	07/06/21	Cauca province	0	0	0	0	0	0	0	0	0	NA	NA	NA	NA	NA	NA
03/08/20	14525	GBIF	PRESERVED_SPECIMEN	HUA	931000462	SPECIES	Herrania	purpurea	0	Herrania purpurea (Pittier) R.E.Schult.	Brand, J. & Ascanio, E.	253	18/03/83	7.350841	-76.546828	931000462	07/06/21	Cauca province	0	0	0	0	0	0	0	0	0	NA	NA	NA	NA	NA	NA
03/08/20	14514	GBIF	PRESERVED_SPECIMEN	HUA	931006234	SPECIES	Herrania	purpurea	0	Herrania purpurea (Pittier) R.E.Schult.	Callejas, R. & Betancur, J.	3519	19/05/87	7.466667	-75.333333	931006234	07/06/21	Magdalena province	8739	0	0	2991	34524	1157051	0.80628856	0.831309497	0.111617966	0.007262498	0	0	0.002485654	0.02869098	0.961560868
03/08/20	14512	GBIF	PRESERVED_SPECIMEN	HUA	931007178	SPECIES	Herrania	nitida	0	Herrania nitida (Poepp.) R.E.Schult.	Callejas, R. & Marulanda, O.	6007	27/02/88	3.06199	-74.48884	931007178	07/06/21	Paramo province	60898	0	0	29641	105817	608931	0.689182291	0.8391155	0.292874337	0.075622728	0	0	0.036807995	0.131402841	0.756166435
03/08/20	14510	GBIF	PRESERVED_SPECIMEN	HUA	931007225	SPECIES	Herrania	albiflora	0	Herrania albiflora Goudot	Callejas, R.; et al.	5669	19/11/87	7.333333	-76.5	931007225	07/06/21	Cauca province	34278	0	0	14764	69006	1087550	0.772680652	0.844256759	0.194574667	0.028432363	0	0	0.012246205	0.057237985	0.902083447
03/08/20	14513	GBIF	PRESERVED_SPECIMEN	HUA	931006753	SPECIES	Herrania	purpurea	0	Herrania purpurea (Pittier) R.E.Schult.	Callejas, R.; et al.	4951	02/08/87	8.02222	-76.58081	931006753	07/06/21	Magdalena province	0	0	0	0	0	0	0	0	0	NA	NA	NA	NA	NA	NA
03/08/20	14516	GBIF	PRESERVED_SPECIMEN	HUA	931005844	SPECIES	Herrania	albiflora	0	Herrania albiflora Goudot	Callejas, R.; et al.	4827	30/07/87	7.017414	-76.293614	931005844	07/06/21	Cauca province	0	0	0	0	0	0	0	0	0	NA	NA	NA	NA	NA	NA
03/08/20	14531	GBIF	PRESERVED_SPECIMEN	HUA	930994133	SPECIES	Herrania	nitida	0	Herrania nitida (Poepp.) R.E.Schult.	Cardona, F. & Lopez, C.	1285	05/12/03	-3.833333	-70.166667	930994133	07/06/21	Imerí province	14147	0	0	1811	9633	1168849	0.854177586	0.87747407	0.129226686	0.011844044	0	0	0.001516192	0.008064867	0.978574897
03/08/20	14496	GBIF	PRESERVED_SPECIMEN	HUA	931015446	SPECIES	Herrania	albiflora	0	Herrania albiflora Goudot	Castano, L.; et al.	118	01/06/92	8.276667	-76.766667	931015446	07/06/21	0	22458	0	0	39644	598942	544545	0.577898964	0.577643156	0.170524054	0.018628239	0	0	0.032883512	0.496804467	0.451683783
03/08/20	12913	GBIF	PRESERVED_SPECIMEN	COAH	1147304534	SPECIES	Theobroma	guianense	0	Theobroma guianense (Aubl.) J.F.Gmel.	CÃ¡rdenas, D.; et al.	42216	27/07/11	1.6	-75.88	1891236946	28/12/20	Paramo province	18285	0	0	15843	57006	1114465	0.799562667	0.848979592	0.161318354	0.015166735	0	0	0.013141185	0.047284379	0.924407701
03/08/20	13902	GBIF	PRESERVED_SPECIMEN	COAH	1062921461	SPECIES	Theobroma	guianense	0	Theobroma guianense (Aubl.) J.F.Gmel.	CÃ¡rdenas, D.; et al.	40430	23/10/10	1.52	-75.48	1062921461	28/12/20	Napo province	0	0	0	0	0	0	0	0	0	NA	NA	NA	NA	NA	NA
03/08/20	2688	GBIF	PRESERVED_SPECIMEN	COAH	1932890592	SPECIES	Theobroma	guianense	0	Theobroma guianense (Aubl.) J.F.Gmel.	CÃ¡rdenas, D.; et al.	40413	22/10/10	1.25	-75.87	1932890592	28/12/20	Napo province	26162	0	0	42651	153671	983117	0.742497196	0.841218412	0.195387609	0.02170038	0	0	0.035377376	0.127464227	0.815458016
03/08/20	14506	GBIF	PRESERVED_SPECIMEN	HUA	931011490	SPECIES	Herrania	dugandii	0	Herrania dugandii GarcÃ­a-Barr.	Espina, J.; et al.	3067	26/08/89	6.11968	-77.41523	931011490	07/06/21	Pacific dominion	114	0	0	230	2781	938845	0.843761498	0.846679091	0.028120796	0.000121023	0	0	0.000244169	0.002952323	0.996682485
03/08/20	14508	GBIF	PRESERVED_SPECIMEN	HUA	931009652	SPECIES	Herrania	albiflora	0	Herrania albiflora Goudot	Fonnegra, R.; et al.	2919	24/05/89	8.410207	-77.162414	931009652	07/06/21	0	35113	0	0	24491	397920	630917	0.652321348	0.667100966	0.215006992	0.032259902	0	0	0.02250099	0.36558711	0.579651998
03/08/20	14535	GBIF	PRESERVED_SPECIMEN	HUA	930990706	SPECIES	Herrania	purpurea	0	Herrania purpurea (Pittier) R.E.Schult.	Fonnegra, R.; et al.	8836	01/03/05	7.754128	-76.640942	930990706	07/06/21	Pacific dominion	22943	0	0	975	5074	664740	0.800708203	0.84028393	0.184667222	0.033071849	0	0	0.001405442	0.007314064	0.958208645
03/08/20	14539	GBIF	PRESERVED_SPECIMEN	HUA	930989242	SPECIES	Herrania	purpurea	0	Herrania purpurea (Pittier) R.E.Schult.	Fonnegra, R.; et al.	7482	27/08/02	8.004472	-75.402833	930989242	07/06/21	Magdalena province	2473	0	0	679	4403	104034	0.760468955	0.804203868	0.141720858	0.022161683	0	0	0.006084829	0.039457294	0.932296194
03/08/20	2711	GBIF	PRESERVED_SPECIMEN	COAH	1932881397	SPECIES	Herrania	nitida	0	Herrania nitida (Poepp.) R.E.Schult.	CÃ¡rdenas, D.; et al.	44309	03/08/14	-0.02	-74.95	1932881397	07/04/21	Napo province	61995	0	0	28661	103005	1011908	0.71553712	0.807957888	0.218287162	0.05142385	0	0	0.023773836	0.085440983	0.839361331
03/08/20	14547	GBIF	PRESERVED_SPECIMEN	HUA	930984459	SPECIES	Herrania	purpurea	0	Herrania purpurea (Pittier) R.E.Schult.	Fonnegra, R.; et al.	7060	21/10/99	6.466166	-74.550697	930984459	07/06/21	Magdalena province	0	0	0	0	0	0	0	0	0	NA	NA	NA	NA	NA	NA
03/08/20	14549	GBIF	PRESERVED_SPECIMEN	HUA	930981651	SPECIES	Herrania	pulcherrima	0	Herrania pulcherrima Goudot	Fonnegra, R.; et al.	6110	12/07/96	7.84098	-77.1513	930981651	07/06/21	Pacific dominion	77059	0	0	22421	69483	1036617	0.748682239	0.847305417	0.231618633	0.063918612	0	0	0.018597687	0.0576345	0.859849201
03/08/20	14546	GBIF	PRESERVED_SPECIMEN	HUA	930985708	SPECIES	Herrania	albiflora	0	Herrania albiflora Goudot	Perez, J.; et al.	1331	27/07/99	6.466667	-74.35	930985708	07/06/21	Magdalena province	21094	0	0	13392	43236	1123316	0.786618721	0.829936326	0.154646176	0.017563141	0	0	0.011150355	0.035998861	0.935287643
03/08/20	14545	GBIF	PRESERVED_SPECIMEN	HUA	930985712	SPECIES	Herrania	nitida	0	Herrania nitida (Poepp.) R.E.Schult.	Vasco, A. & Grupo, A.	104	08/02/00	6.99406	-74.5673	930985712	07/06/21	Magdalena province	60488	0	0	12160	34231	757233	0.752205487	0.841920018	0.241389561	0.070000185	0	0	0.01407225	0.039614078	0.876313487
03/08/20	14542	GBIF	PRESERVED_SPECIMEN	HUA	930988638	SPECIES	Herrania	laciniifolia	0	Herrania laciniifolia Goudot ex Triana & Planch.	Duque, A.; et al.	2597	15/06/01	5.573342	-74.899859	930988638	10/11/20	Magdalena province	61663	0	0	35110	239285	404024	0.556182969	0.626444489	0.217390166	0.083319146	0	0	0.047440689	0.323322281	0.545917885
03/08/20	14501	GBIF	PRESERVED_SPECIMEN	HUA	931014825	SPECIES	Herrania	nitida	0	Herrania nitida (Poepp.) R.E.Schult.	Betancur, J.; et al.	2280	01/12/90	2.420436	-74.762443	931014825	22/04/21	Imerí province	8739	0	0	2991	34524	1157051	0.80628856	0.831309497	0.111617966	0.007262498	0	0	0.002485654	0.02869098	0.961560868
03/08/20	14541	GBIF	PRESERVED_SPECIMEN	HUA	930988813	SPECIEs	Herrania	nitida	0	Herrania nitida (Poepp.) R.E.Schult.	LÃ³pez, R.; et al.	6035	08/01/00	1.93	-72.61	768752725	07/06/21	Imerí province	77059	0	0	22421	69483	1036617	0.748682239	0.847305417	0.231618633	0.063918612	0	0	0.018597687	0.0576345	0.859849201
03/08/20	14499	GBIF	PRESERVED_SPECIMEN	HUA	931015314	SPECIES	Herrania	nitida	0	Herrania nitida (Poepp.) R.E.Schult.	Marulanda, O. & Marquez, S.	1697A	24/01/90	2.466019	-72.934356	931015314	22/04/21	Imerí province	113625	0	0	29519	70290	966988	0.7223173	0.852541745	0.279468936	0.096257948	0	0	0.025007158	0.059546501	0.819188392
03/08/20	14543	GBIF	PRESERVED_SPECIMEN	HUA	930988158	SPECIES	Herrania	cuatrecasana	0	Herrania cuatrecasana GarcÃ­a-Barr.	Thomas, J.; et al.	1586	25/01/68	2.147515727	-74.06840943	1844918572	16/12/20	Imerí province	72433	0	0	27264	104842	1001049	0.705524528	0.806079984	0.23019889	0.060081056	0	0	0.022614691	0.086963374	0.830340879
03/08/20	14495	GBIF	PRESERVED_SPECIMEN	HUA	931016365	SPECIES	Herrania	pulcherrima	0	Herrania pulcherrima Goudot	Caballero, R.	46	03/12/92	2.14987	-78.35387	931016365	07/06/21	Pacific dominion	1192841	0	0	10738	1507	254	-0.067759077	-0.08530806	0.092066979	0.989630312	0	0	0.00890869	0.00125027	0.000210729
03/08/20	14548	GBIF	PRESERVED_SPECIMEN	HUA	930983829	SPECIES	Herrania	pulcherrima	0	Herrania pulcherrima Goudot	Roldan, F.; et al.	3100	16/12/97	7.112985	-74.75139	930983829	22/04/21	Magdalena province	37301	0	0	13067	40333	725357	0.748574975	0.816042781	0.188949766	0.045708761	0	0	0.016012342	0.049424183	0.888854714
03/08/20	2706	GBIF	PRESERVED_SPECIMEN	COAH	1932882714	SPECIES	Herrania	nitida	0	Herrania nitida (Poepp.) R.E.Schult.	CÃ¡rdenas, D.; et al.	44374	12/06/15	3.92	-68.12	1932882714	07/04/21	Imerí province	90900	0	0	27340	80213	1006289	0.715861168	0.815963745	0.227841836	0.075451839	0	0	0.022693656	0.066581061	0.835273444
03/08/20	14534	GBIF	PRESERVED_SPECIMEN	HUA	930991519	SPECIES	Herrania	pulcherrima	0	Herrania pulcherrima Goudot	Betancur, J. & Gil, A.	7932	19/02/99	5.858333	-77.286667	930991519	22/04/21	0	102332	0	0	32686	148623	921896	0.685657298	0.79982233	0.243768518	0.084884993	0	0	0.027113228	0.123283649	0.76471813
03/08/20	14530	GBIF	PRESERVED_SPECIMEN	HUA	930996397	SPECIES	Herrania	purpurea	0	Herrania purpurea (Pittier) R.E.Schult.	Idarraga, A. & Cardona, F.	2896	03/01/04	8.409167	-77.198363	0	09/12/20	Pacific dominion	23147	0	0	6179	27192	1149029	0.816607505	0.854238331	0.146636219	0.019200413	0	0	0.005125474	0.022555736	0.953118377
03/08/20	14492	GBIF	PRESERVED_SPECIMEN	HUA	931018339	SPECIES	Herrania	purpurea	0	Herrania purpurea (Pittier) R.E.Schult.	RenterÃ­a, E.; et al.	10899	22/03/95	7.9004	-77.14053	931018339	09/12/20	Pacific dominion	37301	0	0	13067	40333	725357	0.748574975	0.816042781	0.188949766	0.045708761	0	0	0.016012342	0.049424183	0.888854714
03/08/20	14497	GBIF	PRESERVED_SPECIMEN	HUA	931015329	SPECIES	Herrania	nitida	0	Herrania nitida (Poepp.) R.E.Schult.	Renteria, E.; et al.	1786	19/09/79	6.520195	-74.105484	1890995847	09/11/20	Magdalena province	23147	0	0	6179	27192	1149029	0.816607505	0.854238331	0.146636219	0.019200413	0	0	0.005125474	0.022555736	0.953118377
03/08/20	14528	GBIF	PRESERVED_SPECIMEN	HUA	930999336	SPECIES	Herrania	purpurea	0	Herrania purpurea (Pittier) R.E.Schult.	Rivera, A. & Granada, J.	180	18/12/11	8.123442	-76.1558	930999336	09/12/20	Magdalena province	0	0	0	0	0	0	0	0	0	NA	NA	NA	NA	NA	NA
03/08/20	14527	GBIF	PRESERVED_SPECIMEN	HUA	930999546	SPECIES	Herrania	nitida	0	Herrania nitida (Poepp.) R.E.Schult.	Taborda, A. & Londono, L.	266	24/10/10	7.361128	-75.031581	930999546	09/12/20	Magdalena province	137869	0	0	37259	209614	820425	0.649938518	0.777584195	0.27308621	0.114398254	0	0	0.030916047	0.173929422	0.680756277
03/08/20	14660	GBIF	PRESERVED_SPECIMEN	COAH	768757970	SPECIES	Herrania	nitida	0	Herrania nitida (Poepp.) R.E.Schult.	Arias, J.C.; et al.	901	17/08/00	-3.67	-70.33	768757970	07/04/21	Imerí province	72433	0	0	27264	104842	1001049	0.705524528	0.806079984	0.23019889	0.060081056	0	0	0.022614691	0.086963374	0.830340879
03/08/20	14633	GBIF	PRESERVED_SPECIMEN	COAH	768767911	SPECIES	Theobroma	guianense	0	Theobroma guianense (Aubl.) J.F.Gmel.	Arias, J.C.; et al.	1080	20/02/06	-3.81	-70.25	768767911	28/12/20	Imerí province	1129745	0	0	1	0	0	-0.031464329	-0.028046607	0.018538401	0.999999115	0	0	8.85E-07	0	0
03/08/20	14689	GBIF	PRESERVED_SPECIMEN	COAH	768752033	SPECIES	Theobroma	obovatum	0	Theobroma obovatum Klotzsch ex Bernoulli	Duque, A.; et al.	31	01/04/92	-0.53	-72.09	768752033	23/09/20	Imerí province	797996	0	0	34788	79781	292128	0.172428217	-0.043478262	0.393763827	0.662406107	0	0	0.028877067	0.066225171	0.242491656
03/08/20	13120	GBIF	PRESERVED_SPECIMEN	HUA	1123882307	SPECIES	Theobroma	glaucum	0	Theobroma glaucum H.Karst.	Roldan, F.; et al.	3039	13/12/97	6.9735944	-74.5726018	1123882307	22/10/20	Magdalena province	48204	0	0	26615	129642	1001083	0.735724215	0.834999979	0.222187194	0.039985268	0	0	0.02207717	0.107538174	0.830399388
03/08/20	13017	GBIF	PRESERVED_SPECIMEN	HUA	1123919850	SPECIES	Theobroma	glaucum	0	Theobroma glaucum H.Karst.	Gil, N.	36	13/12/94	6.495473	-74.84024	1123919850	07/09/20	Magdalena province	797996	0	0	34788	79781	292128	0.172428217	-0.043478262	0.393763827	0.662406107	0	0	0.028877067	0.066225171	0.242491656
03/08/20	13135	GBIF	PRESERVED_SPECIMEN	MBML	1123789382	SPECIES	Theobroma	guianense	0	Theobroma guianense (Aubl.) J.F.Gmel.	Sant'ana, S.C.	261	26/11/92	-14.7855812	-39.2230747	0	05/04/21	South American Atlantic coast	19157	0	0	13021	133060	419898	0.66020408	0.69958216	0.198317748	0.032739397	0	0	0.022252946	0.227400126	0.717607531
03/08/20	13136	GBIF	PRESERVED_SPECIMEN	MBML	1123789326	SPECIES	Theobroma	obovatum	0	Theobroma obovatum Klotzsch ex Bernoulli	Sant'ana, S.C.	260	26/11/92	-14.771435	-39.2277088	0	28/09/20	South American Atlantic coast	19781	0	0	1686	41089	1143043	0.803792925	0.864366889	0.159686221	0.016407611	0	0	0.001398475	0.034081813	0.9481121
03/08/20	13140	GBIF	PRESERVED_SPECIMEN	PSO	1099641724	SPECIES	Herrania	pulcherrima	0	Herrania pulcherrima Goudot	Gentry, A.; et al.	64510	06/01/89	1.66667	-78.2	0	22/04/21	Pacific dominion	797996	0	0	34788	79781	292128	0.172428217	-0.043478262	0.393763827	0.662406107	0	0	0.028877067	0.066225171	0.242491656
03/08/20	13142	GBIF	PRESERVED_SPECIMEN	PSO	1099639851	SPECIES	Herrania	purpurea	0	Herrania purpurea (Pittier) R.E.Schult.	Betancur, J. & Gil, A.	7932	19/02/99	5.85	-77.28333	930991519	22/04/21	0	1039	0	0	969	6129	964336	0.869857078	0.876989841	0.052628138	0.00106841	0	0	0.000996429	0.006302489	0.991632673
03/08/20	13148	GBIF	PRESERVED_SPECIMEN	PSO	1099628152	SPECIES	Herrania	pulcherrima	0	Herrania pulcherrima Goudot	Guarin-M, R.	784	04/08/87	1.00951	-76.6506	0	22/04/21	Napo province	48685	0	0	26801	79382	1050716	0.757630527	0.840777695	0.196672978	0.040382918	0	0	0.02223072	0.065845267	0.871541095
03/08/20	13151	GBIF	PRESERVED_SPECIMEN	PSO	1099626514	SPECIES	Herrania	pulcherrima	0	Herrania pulcherrima Goudot	Ramirez-P, B.R.; et al.	8749	10/11/95	1.36667	-78.46667	0	22/04/21	Cauca province	170631	0	0	39766	160054	835093	0.642435522	0.812109888	0.304970513	0.141538592	0	0	0.032985938	0.132764959	0.692710511
03/08/20	13155	GBIF	PRESERVED_SPECIMEN	PSO	1099626097	SPECIES	Herrania	pulcherrima	0	Herrania pulcherrima Goudot	De-Benavides, O.	3256	23/11/81	1.4	-78.58333	0	22/04/21	Pacific dominion	139821	0	0	14251	68494	857415	0.646253137	0.841756701	0.410128487	0.129466167	0	0	0.013195603	0.063421486	0.793916745
03/08/20	13164	GBIF	PRESERVED_SPECIMEN	HPUJ	1098683275	SPECIES	Herrania	laciniifolia	0	Herrania laciniifolia Goudot ex Triana & Planch.	Bustos-Giraldo, M.V.	34	15/01/00	5.640556	-74.768301	1098683275	09/11/20	Magdalena province	24587	0	0	6138	73033	989942	0.777572666	0.865239799	0.208227848	0.022480571	0	0	0.005612142	0.066776081	0.905131206
03/08/20	13167	GBIF	PRESERVED_SPECIMEN	HPUJ	1098672903	SPECIES	Herrania	pulcherrima	0	Herrania pulcherrima Goudot	Sus, K.	13	10/08/87	5.2153503	-74.9334588	0	22/04/21	Magdalena province	147382	0	0	25484	176828	855630	0.644052284	0.763287425	0.315930606	0.122275836	0	0	0.021142863	0.146705782	0.709875519
03/08/20	13168	GBIF	PRESERVED_SPECIMEN	HPUJ	1098672022	SPECIES	Theobroma	guianense	0	Theobroma guianense (Aubl.) J.F.Gmel.	Sanchez, R.	2789	08/09/95	1.186429	-75.448744	0	17/03/21	Napo province	23096	0	0	9953	158627	774732	0.706528542	0.789530516	0.189896239	0.023898809	0	0	0.010298963	0.164140818	0.80166141
03/08/20	13179	GBIF	PRESERVED_SPECIMEN	S	1096749428	SPECIES	Herrania	pulcherrima	0	Herrania pulcherrima Goudot	Harling, G.	4569	28/03/59	0.7974446	-79.6261986	0	22/04/21	Pacific dominion	23104	0	0	5606	26004	1093396	0.816014187	0.861716628	0.189846538	0.020123507	0	0	0.004882807	0.022649398	0.952344288
03/08/20	13227	GBIF	PRESERVED_SPECIMEN	MBM	1095574985	SPECIES	Theobroma	guianense	0	Theobroma guianense (Aubl.) J.F.Gmel.	Nicolau, S.A.; et al.	877	10/02/95	-2.8833333	-59.9666667	1265518027	30/11/20	Roraima province	10394	0	0	15739	118026	1061443	0.771113074	0.841849774	0.154075544	0.008621419	0	0	0.013054889	0.09789798	0.880425713
03/08/20	11740	GBIF	PRESERVED_SPECIMEN	MO	1258381313	SPECIES	Theobroma	glaucum	0	Theobroma glaucum H.Karst.	Shepherd, J.D.	801	31/07/77	7.5	-74.83333	1123911771	07/09/20	Magdalena province	3130	0	0	4001	21024	626064	0.849000162	0.88846153	0.114367692	0.004784331	0	0	0.006115689	0.032136028	0.956963952
03/08/20	13271	GBIF	PRESERVED_SPECIMEN	EAFM	1095267599	SPECIES	Theobroma	microcarpum	0	Theobroma microcarpum Mart.	Assuncao, P.A.C.L. & Zartman, C.E.	1519	13/03/06	-5.216667	-69.3166667	1042477164	16/09/20	Madeira province	0	0	0	0	0	0	0	0	0	NA	NA	NA	NA	NA	NA
[truncated: 381 more rows]
