# Supplementary material for: Human influence on the distribution of cacao: insights from remote sensing and biogeography
Source: Springer Nature journal article supplement (doi:10.1007/s10531-023-02777-7), 2024-02-10
Supplement: MOESM1 [file 26722336 › Supplementary/AppendixS2 - Kstests/AppendixS2-A.xlsx]

## Sheet: TableS1
replicate	median_NDVI	relative_freq_forests	relative_freq_disturbed_areas
1	0.022218	0.000134162	1.9083e-11			variable	replicas with p-value > 0.05	% replicas with p-value < 0.05
2	0.00152325	6.45304e-05	0			median_NDVI	16	0.984
3	0.0136638	0.00190966	9.71934e-12			relative_freq_forests	17	0.983
4	0.022218	6.54066e-05	3.15525e-13			relative_freq_disturbed_areas	4	0.996
5	0.0161121	0.00264826	1.59367e-10
6	0.0545103	2.78217e-05	1.19349e-13
7	0.00574944	0.000182749	3.90021e-13
8	0.00974547	7.04772e-06	2.15383e-14
9	0.0626941	5.1293e-05	2.10942e-15
10	0.000437933	1.27586e-05	0
11	0.0136638	0.000229328	6.58362e-14
12	0.0408666	0.00170422	2.7981e-12
13	0.00574944	0.000234179	5.55112e-16
14	0.000542803	1.47002e-08	1.9984e-15
15	0.0259822	5.34398e-06	3.59601e-13
16	0.00974547	0.000225305	2.27985e-11
17	0.0136638	0.00551176	3.70814e-14
18	0.0018569	6.43807e-05	8.14477e-10
19	0.0352377	0.000330932	5.92859e-14
20	0.0719068	5.6853e-05	2.1346e-11
21	0.0189465	4.1579e-05	1.63169e-11
22	0.0303	4.39432e-05	2.96319e-13
23	0.0408666	3.59264e-05	1.06208e-11
24	0.0161121	4.67317e-06	3.10862e-15
25	0.0115555	0.00615862	1.68865e-13
26	0.022218	0.000164103	4.50084e-13
27	0.0408666	0.00314895	1.55254e-09
28	0.0136638	1.07003e-05	2.59459e-13
29	0.0259822	7.4085e-06	4.92084e-12
30	0.0303	0.000167387	5.62805e-12
31	0.0161121	0.000499952	5.32907e-15
32	0.0545103	0.000641547	3.16506e-11
33	0.0161121	0.000166399	5.5822e-11
34	0.00225737	0.000302574	8.08631e-12
35	0.0352377	0.000308273	4.44089e-15
36	0.0545103	5.21645e-05	1.39686e-11
37	0.0115555	0.000441822	6.83786e-13
38	0.0626941	0.056111	8.87609e-10
39	0.00819622	1.65899e-05	1.74083e-13
40	0.00398864	4.41021e-05	2.20179e-12
41	0.0136638	2.1333e-05	6.17617e-13
42	0.00819622	0.000821619	1.73972e-13
43	0.00479542	0.000107346	4.44089e-16
44	0.022218	0.00146854	1.22713e-12
45	0.0626941	3.37954e-06	1.22165e-11
46	0.00479542	0.000743447	1.35891e-13
47	0.0189465	7.82626e-05	5.19279e-11
48	0.0136638	0.00109947	3.40927e-12
49	0.00398864	8.44547e-07	0
50	0.00479542	1.19371e-05	1.77636e-15
51	8.21746e-06	1.79929e-05	2.88658e-15
52	1.3698e-05	6.17931e-06	0
53	0.153151	0.0561497	0.00556902
54	8.23475e-06	6.36872e-05	2.24107e-11
55	3.79019e-06	0.000565202	1.90958e-14
56	5.41143e-06	0.000152975	0
57	1.18437e-07	0.00147403	1.66533e-15
58	3.30421e-07	0.000150295	5.05151e-14
59	2.59116e-06	1.45283e-05	3.82748e-11
60	8.85194e-05	1.13672e-05	4.70735e-14
61	1.25972e-06	8.01214e-06	3.03535e-13
62	5.1698e-06	0.00400502	9.07226e-10
63	4.24871e-06	0.000983102	8.77076e-15
64	1.87233e-07	0.00793226	2.84723e-10
65	5.28022e-06	0.000404065	2.13163e-14
66	1.69233e-06	0.00300858	3.86358e-13
67	4.5942e-06	0.000209037	1.50539e-09
68	4.95679e-05	0.000849852	2.95889e-09
69	7.19052e-07	0.00524714	2.13293e-10
70	2.31714e-07	0.00129854	1.12976e-12
71	1.09706e-06	4.01528e-05	7.40519e-14
72	1.23888e-06	9.39978e-05	2.32481e-13
73	1.25819e-06	0.000928126	8.14682e-13
74	3.08044e-06	7.82626e-05	3.81029e-13
75	2.20278e-07	0.0024657	1.55431e-15
76	4.05488e-07	0.000582788	1.98175e-13
77	1.32883e-05	0.000377892	1.48145e-11
78	2.41883e-06	0.00151178	3.88765e-11
79	1.35965e-05	0.00348286	3.14218e-11
80	2.93782e-07	0.00330907	8.29337e-14
81	1.23122e-06	3.26493e-05	2.00751e-12
82	1.14567e-05	0.0249033	3.11429e-08
83	1.91702e-06	0.000340057	9.09273e-14
84	9.40751e-06	0.00133723	1.00131e-11
85	1.04831e-06	0.00537843	9.579e-13
86	2.10934e-06	0.0290786	3.18336e-08
87	2.2076e-06	0.000528722	2.71339e-13
88	4.38687e-06	0.000791944	1.43718e-12
89	2.94259e-06	8.03248e-05	2.83884e-12
90	1.96371e-06	4.1608e-05	1.03251e-12
91	2.72119e-07	0.00069496	3.02158e-12
92	5.05464e-07	0.000488014	6.22513e-12
93	0.40705	0.766549	0.411561
94	1.31785e-06	0.00128827	3.76699e-13
95	9.88455e-06	0.000821097	5.51126e-12
96	2.59466e-07	0.0043217	7.25421e-10
97	1.30474e-05	1.21769e-05	1.58096e-13
98	2.02026e-05	0.00207183	1.45439e-14
99	4.48928e-06	1.57632e-05	0
100	4.39431e-05	0.000193366	1.15696e-12
101	1.93139e-06	0.00241702	7.36173e-11
102	4.39431e-05	0.00145363	5.86373e-09
103	1.25464e-05	0.00243138	8.52665e-10
104	4.67e-07	0.00341885	2.18714e-13
105	2.54433e-06	0.042341	1.60168e-07
106	1.25464e-05	0.00035547	1.37286e-11
107	2.54433e-06	0.00372913	9.81773e-08
108	0.000670925	1.16469e-07	9.38916e-13
109	7.11571e-05	0.000221175	6.57918e-13
110	4.39431e-05	0.0152027	8.87452e-11
111	1.25464e-05	0.0168402	2.50958e-10
112	5.59959e-05	0.0008496	5.67379e-12
113	0.000282702	8.64039e-05	2.72293e-09
114	7.11571e-05	4.63388e-05	2.57085e-11
115	3.3425e-06	0.000479715	2.23155e-14
116	0.000282702	0.00208583	6.4259e-09
117	2.0887e-05	0.00182349	1.23954e-10
118	9.01732e-05	7.23521e-05	2.24567e-11
119	1.25464e-05	0.0191796	5.86373e-09
120	2.68381e-05	0.00312676	5.71696e-09
121	1.25464e-05	1.22674e-05	2.59903e-13
122	1.25464e-05	2.55581e-06	3.86691e-13
123	1.46206e-06	0.0032165	9.73289e-11
124	1.25464e-05	0.000219286	1.11452e-10
125	1.25464e-05	0.00393489	2.20646e-08
126	2.0887e-05	1.0841e-05	5.83789e-12
127	5.59959e-05	0.000233446	5.95723e-12
128	0.0018569	1.14376e-07	3.44169e-15
129	1.62106e-05	0.00080852	2.4285e-12
130	1.62106e-05	3.7041e-05	1.08813e-12
131	9.68357e-06	0.00038593	1.10534e-10
132	9.68357e-06	0.0458931	9.53463e-10
133	7.11571e-05	3.56678e-05	7.96696e-13
134	4.39431e-05	0.0253075	1.02139e-11
135	9.01732e-05	0.000280496	8.67643e-11
136	1.25464e-05	0.000114378	2.08651e-11
137	1.46206e-06	6.91445e-07	0
138	2.0887e-05	0.0111618	9.66482e-07
139	7.45331e-06	0.00322625	1.59557e-08
140	9.01732e-05	9.64901e-05	4.91513e-11
141	5.72084e-06	0.00106123	5.29145e-11
142	7.45331e-06	1.22674e-05	7.77156e-16
143	0.000113955	9.5087e-06	3.54161e-14
144	2.59582e-07	0.010365	4.83573e-11
145	9.68357e-06	0.000231518	9.77551e-13
146	3.43892e-05	0.000143455	2.53131e-14
147	2.0887e-05	0.000568392	4.26438e-10
148	5.72084e-06	0.000378874	3.10529e-13
149	9.01732e-05	0.000221768	2.87351e-08
150	0.000113955	4.14457e-07	1.66533e-15
151	3.3425e-06	0.000180126	3.43059e-14
152	2.0887e-05	2.49718e-05	4.61076e-13
153	9.01732e-05	0.000114311	1.21276e-09
154	9.01732e-05	6.29956e-06	1.11022e-16
155	7.11571e-05	0.0061358	1.39647e-09
156	7.45331e-06	0.000847744	4.1012e-11
157	7.11571e-05	0.000178966	1.79589e-10
158	1.25464e-05	4.6833e-05	1.5163e-11
159	1.25464e-05	0.0024569	4.21697e-11
160	3.43892e-05	0.000659096	6.23945e-13
161	7.45331e-06	9.99858e-06	2.46581e-13
162	8.30898e-07	0.000197042	2.22045e-15
163	4.37892e-06	0.0064433	3.90403e-10
164	1.46206e-06	0.000276238	3.23923e-11
165	9.01732e-05	0.00121073	3.83582e-13
166	7.45331e-06	0.0314211	4.23351e-08
167	2.68381e-05	0.00276405	7.68266e-10
168	0.000143611	0.00016849	3.30415e-10
169	3.43892e-05	0.00629794	9.8791e-12
170	1.62106e-05	0.000202979	3.25573e-12
171	9.68357e-06	0.0017324	6.81065e-11
172	9.68357e-06	3.8913e-05	2.14273e-14
173	3.3425e-06	0.000120736	1.59728e-12
174	3.43892e-05	0.00279392	1.80048e-09
175	9.68357e-06	0.000113941	9.91152e-12
176	1.25464e-05	0.0157892	7.26599e-09
177	1.62106e-05	0.00549046	1.83786e-12
178	3.3425e-06	0.00495016	1.00678e-09
179	1.62106e-05	0.000933333	1.23327e-11
180	2.68381e-05	1.57843e-05	8.75522e-13
181	4.37892e-06	0.000356054	1.16837e-11
182	7.45331e-06	0.000121689	1.55209e-13
183	7.45331e-06	0.000353429	2.99667e-11
184	7.45331e-06	0.000879864	8.80565e-10
185	7.11571e-05	0.000327813	1.58805e-10
186	5.72084e-06	0.0129485	1.49649e-08
187	0.000282702	0.000767312	1.42702e-07
188	5.72084e-06	0.000578082	3.20044e-12
189	9.68357e-06	0.00228171	7.67398e-10
190	9.01732e-05	0.00012487	4.4738e-11
191	2.68381e-05	0.00115189	2.47767e-10
192	3.43892e-05	0.000662838	2.20883e-11
193	2.68381e-05	0.000634851	2.65232e-13
194	2.0887e-05	0.0084241	1.119e-09
195	2.68381e-05	0.00220838	1.99699e-10
196	4.67e-07	0.00269016	2.52538e-08
197	1.93139e-06	0.00669567	4.46485e-10
198	1.46206e-06	0.00234512	3.2454e-10
199	3.43892e-05	0.0294489	3.71264e-08
200	8.30898e-07	0.00876299	1.49882e-10
201	7.45331e-06	0.000804996	6.72953e-10
202	4.39431e-05	0.00369928	6.16598e-10
203	0.000113955	0.000180281	2.65472e-09
204	1.62106e-05	4.95887e-05	6.81799e-12
205	0.997687	0.595711	0.385456
206	0.000143611	0.000196173	3.4498e-12
207	9.68357e-06	0.000128077	6.66134e-16
208	1.93139e-06	0.00630551	2.21856e-11
209	1.46206e-06	8.81698e-06	1.36557e-14
210	9.68357e-06	0.000135265	4.09672e-14
211	0.000113955	1.37878e-06	1.08813e-12
212	2.68381e-05	0.00184524	1.82294e-11
213	9.68357e-06	0.000589096	9.83658e-11
214	0.000143611	0.000297152	3.11117e-10
215	4.37892e-06	0.0102887	4.27472e-09
216	4.67e-07	0.0131678	1.32025e-10
217	9.01732e-05	0.00188321	2.55625e-09
218	4.39431e-05	0.0001982	3.33067e-16
219	2.0887e-05	0.000310311	2.87548e-13
220	9.01732e-05	0.00791548	3.53147e-08
221	2.0887e-05	0.00129559	6.5424e-09
222	9.68357e-06	4.46992e-05	2.55351e-15
223	3.43892e-05	3.30878e-05	3.11117e-10
224	0.000113955	0.0019081	1.20625e-10
225	2.68381e-05	3.34172e-06	2.70517e-12
226	8.30898e-07	0.000979506	2.07563e-10
227	5.72084e-06	0.000189966	2.98206e-13
228	1.46206e-06	0.0556719	1.53057e-07
229	1.25464e-05	0.00147903	6.91493e-10
230	2.68381e-05	0.00117492	3.30333e-09
231	7.45331e-06	0.000408864	1.19236e-11
232	9.68357e-06	0.00172571	1.18115e-08
233	1.25464e-05	0.0016446	3.9585e-12
234	0.000113955	0.0113745	2.31553e-10
235	1.62106e-05	0.00818043	1.77124e-07
236	3.3425e-06	0.0084241	5.32894e-09
237	9.68357e-06	0.000180688	1.26307e-10
238	1.62106e-05	0.000120942	8.67643e-11
239	2.54433e-06	0.000555172	2.43028e-12
240	3.3425e-06	0.000481497	2.98362e-11
241	1.62106e-05	0.0021434	9.53797e-08
242	4.37892e-06	0.00169679	2.28706e-14
243	4.37892e-06	0.00875217	2.60375e-09
244	7.45331e-06	0.000160509	1.37545e-10
245	2.68381e-05	0.00121073	2.60111e-10
246	3.43892e-05	0.00133707	2.41193e-11
247	3.43892e-05	0.00274875	1.15429e-10
248	4.37892e-06	0.00128304	9.95902e-09
249	9.68357e-06	0.000728885	7.72826e-13
250	0.000180483	0.000184942	5.55556e-13
251	9.68357e-06	6.39097e-05	2.34124e-10
252	5.59959e-05	0.0155733	9.1592e-10
253	9.68357e-06	0.000189966	1.40036e-11
254	1.93139e-06	0.00151878	2.88658e-15
255	5.59959e-05	0.000477452	7.76089e-10
256	2.54433e-06	0.00330426	1.94293e-10
257	1.62106e-05	0.00228171	2.43361e-13
258	9.68357e-06	0.000657478	1.17906e-13
259	1.62106e-05	0.00398915	3.40841e-10
260	5.72084e-06	0.00820154	1.14867e-10
261	1.93139e-06	0.000202339	2.28306e-12
262	1.25464e-05	0.00334741	2.25673e-10
263	5.72084e-06	0.000295193	2.43583e-12
264	0.000143611	0.000824064	7.67398e-10
265	1.46206e-06	0.0718294	3.33285e-11
266	1.62106e-05	0.0106692	1.58104e-09
267	5.72084e-06	0.000143865	1.48637e-12
268	3.3425e-06	0.00208474	1.0225e-10
269	1.93139e-06	0.000233446	4.66538e-12
270	9.68357e-06	0.00703527	1.22014e-13
271	2.0887e-05	0.00716995	1.58805e-10
272	3.43892e-05	0.000241157	6.57918e-13
273	2.68381e-05	0.00123289	9.17725e-11
274	2.54433e-06	0.00016921	5.32463e-13
275	2.0887e-05	0.0171961	1.09413e-10
276	3.3425e-06	3.35953e-05	6.01741e-14
277	3.48656e-07	0.0135887	4.30322e-13
278	5.59959e-05	0.000773692	1.2113e-08
279	2.68381e-05	0.000208006	1.06437e-12
280	2.54433e-06	1.68481e-06	1.63203e-14
281	9.68357e-06	0.00137089	1.38223e-13
282	7.45331e-06	0.00161178	9.77551e-13
283	1.25464e-05	0.00491587	5.32463e-13
284	2.54433e-06	0.00324185	1.27594e-09
285	0.000113955	1.42328e-05	7.94109e-12
286	3.3425e-06	0.000477452	4.98757e-12
287	1.10372e-06	0.00253266	2.9218e-11
288	3.43892e-05	0.00139209	3.71546e-11
289	6.23784e-07	0.0661809	2.1023e-08
290	3.3425e-06	0.000417617	1.19236e-11
291	1.62106e-05	0.000178966	1.39666e-13
292	2.68381e-05	0.00365236	3.18848e-08
293	2.68381e-05	0.000159733	3.83582e-13
294	4.39431e-05	0.000388949	2.19471e-10
295	2.0887e-05	0.00487092	1.00774e-09
296	0.000113955	7.18675e-05	8.44391e-12
297	4.37892e-06	0.000427602	1.44051e-12
298	4.37892e-06	0.0023001	2.5091e-14
299	1.25464e-05	0.000177039	5.88418e-15
300	7.11571e-05	0.000517103	6.79068e-10
301	1.62106e-05	2.92605e-05	1.33227e-15
302	1.93139e-06	0.00944103	7.56095e-12
303	3.43892e-05	0.000406286	7.80617e-08
304	0.000113955	0.00428922	2.56557e-10
305	2.54433e-06	0.00454023	1.58805e-10
306	5.72084e-06	7.6175e-05	8.11951e-12
307	7.45331e-06	0.00127272	3.25754e-11
308	7.11571e-05	0.000249173	6.7446e-13
309	2.0887e-05	0.000660324	5.12011e-10
310	4.39431e-05	0.000889919	4.69813e-12
311	2.0887e-05	2.70238e-05	1.79967e-13
312	5.72084e-06	1.06802e-05	2.06613e-12
313	2.0887e-05	0.00179503	2.94657e-10
314	9.01732e-05	6.06419e-05	2.79332e-13
315	3.3425e-06	0.0395783	2.87351e-08
316	2.54433e-06	0.00417433	7.97795e-08
317	0.000143611	1.42438e-06	2.92806e-11
318	9.01732e-05	0.0100972	5.8578e-07
319	2.68381e-05	1.75065e-05	3.80806e-14
320	3.48656e-07	0.00495016	2.73004e-13
321	2.68381e-05	0.000305499	4.32543e-13
322	2.54433e-06	9.41176e-05	1.02051e-11
323	2.0887e-05	9.2985e-05	1.65268e-12
324	0.000226196	7.7548e-07	0
325	9.01732e-05	0.000204255	2.46235e-08
326	2.68381e-05	0.00279392	6.73585e-09
327	2.68381e-05	0.000404829	1.34626e-12
328	9.01732e-05	0.000145633	3.50134e-09
329	9.01732e-05	0.000119171	1.82294e-11
330	0.000143611	0.000279698	3.39362e-12
331	2.54433e-06	0.00685797	2.34899e-09
332	3.3425e-06	0.000177561	1.59823e-11
333	9.68357e-06	0.000593326	2.43916e-13
334	2.68381e-05	0.0117218	8.92342e-12
335	1.25464e-05	0.000502199	1.29163e-12
336	9.01732e-05	0.000211704	2.70517e-12
337	1.46206e-06	0.00115757	2.89213e-13
338	7.45331e-06	0.000105621	1.65423e-14
339	9.68357e-06	0.00050325	1.10232e-11
340	7.45331e-06	0.0056369	4.31009e-11
341	1.25464e-05	0.000862687	8.99281e-15
342	2.68381e-05	0.000690186	4.81071e-12
343	7.45331e-06	0.00237892	6.60665e-11
344	0.000226196	4.27484e-05	6.12921e-10
345	6.23784e-07	0.00130336	1.44051e-12
346	3.3425e-06	0.000145304	7.22755e-14
347	2.68381e-05	4.05402e-05	3.71546e-11
348	1.93139e-06	0.0036761	4.42835e-12
349	1.93139e-06	0.00359295	3.55893e-12
350	0.00152325	0.000594782	1.66598e-10
351	7.45331e-06	9.47347e-05	1.22231e-11
352	5.72084e-06	1.40082e-05	6.90559e-14
353	5.59959e-05	1.80036e-05	9.83658e-11
354	1.25464e-05	0.0011927	4.55191e-15
355	5.72084e-06	0.000485628	5.78115e-12
356	9.68357e-06	0.000570013	1.83508e-11
357	1.46206e-06	0.000617474	5.13256e-13
358	2.68381e-05	0.00131892	4.50835e-11
359	4.37892e-06	0.000305499	1.39666e-13
360	1.62106e-05	0.000691675	1.63258e-12
361	1.46206e-06	0.00169333	5.9186e-13
362	4.37892e-06	2.02551e-05	8.41738e-12
363	3.3425e-06	0.000278115	1.75415e-13
364	0.000282702	0.000145304	5.26718e-10
365	7.45331e-06	0.000127414	1.84008e-12
366	3.3425e-06	0.000809341	1.09792e-11
367	1.62106e-05	0.00208474	4.53915e-12
368	7.11571e-05	3.4268e-06	5.89262e-12
369	2.0887e-05	0.00267315	2.75463e-11
370	0.0018569	0.000101053	2.91964e-09
371	5.72084e-06	0.00171811	6.78502e-12
372	5.72084e-06	0.00208583	1.82294e-11
373	4.37892e-06	5.03885e-05	1.65268e-12
374	4.67e-07	0.00539947	1.14142e-12
375	1.25464e-05	0.00594904	1.40343e-10
376	1.10372e-06	0.0292534	1.64162e-11
377	2.54433e-06	0.00040399	2.29483e-13
378	7.45331e-06	2.43584e-05	9.83658e-11
379	3.3425e-06	0.0160232	8.96072e-12
380	3.43892e-05	8.62232e-05	2.52021e-14
381	1.25464e-05	0.000887154	1.96917e-09
382	2.0887e-05	0.000169449	5.78115e-12
383	2.0887e-05	0.000170197	1.16224e-10
384	1.93139e-06	0.0046703	1.2743e-11
385	7.45331e-06	0.00133782	2.22045e-15
386	3.48656e-07	1.55845e-06	4.44089e-16
387	5.72084e-06	0.038627	3.81059e-09
388	5.59959e-05	0.00612947	3.45323e-11
389	3.3425e-06	0.000165447	2.64233e-14
390	2.54433e-06	0.00367728	1.16846e-10
391	1.25464e-05	0.000653394	3.09752e-14
392	0.000226196	0.00210005	3.28589e-09
393	4.37892e-06	0.0135153	6.45931e-07
394	5.59959e-05	0.000337139	1.16373e-09
395	9.01732e-05	0.000107255	3.05524e-09
396	4.37892e-06	0.00305586	4.93754e-09
397	3.3425e-06	0.00708871	1.36516e-10
398	0.000226196	4.29242e-06	1.99951e-13
399	4.37892e-06	0.0023001	1.8788e-10
400	4.37892e-06	7.39092e-06	0
401	4.39431e-05	0.0008496	1.36431e-11
402	3.3425e-06	0.000889622	5.56222e-14
403	4.37892e-06	0.00806553	9.49995e-09
404	9.01732e-05	2.38563e-07	4.44089e-16
405	4.39431e-05	3.1833e-05	2.87267e-11
406	4.37892e-06	0.000591562	2.03855e-10
407	7.45331e-06	0.000455794	5.20173e-12
408	4.37892e-06	0.00347652	1.70483e-09
409	1.25464e-05	0.0129885	3.23972e-09
410	9.01732e-05	0.00341063	1.37951e-07
411	1.62106e-05	0.033833	9.19314e-09
412	1.93139e-06	0.000280984	5.11691e-10
413	4.37892e-06	0.00123536	8.53052e-09
414	9.01732e-05	0.00133068	2.94442e-12
415	1.25464e-05	0.000172735	7.04819e-10
416	5.59959e-05	0.000569817	8.67184e-12
417	3.3425e-06	0.000833389	1.60538e-13
418	2.68381e-05	0.000510682	6.37318e-10
419	9.68357e-06	0.00441152	1.82294e-11
420	5.59959e-05	0.00012786	4.79061e-13
421	9.68357e-06	8.57662e-06	6.21725e-15
422	1.25464e-05	1.81897e-05	1.33227e-15
423	9.68357e-06	0.00363554	9.61631e-12
424	1.93139e-06	0.00925822	4.10783e-15
425	4.39431e-05	0.000182231	9.91152e-12
426	9.68357e-06	0.00263603	1.4099e-09
427	3.48656e-07	0.000487707	3.76477e-13
428	3.43892e-05	0.000845761	7.34566e-10
429	9.01732e-05	0.00419462	1.00545e-08
430	9.01732e-05	6.08321e-05	1.26544e-11
431	3.43892e-05	0.00405	4.91029e-12
432	7.45331e-06	0.000120522	2.41348e-10
433	9.68357e-06	1.71666e-05	1.70941e-12
434	2.0887e-05	0.000781054	2.20571e-09
435	1.93139e-06	0.000205774	3.4092e-11
436	1.62106e-05	0.0157892	4.9748e-09
437	4.37892e-06	0.0994374	1.07774e-09
438	1.62106e-05	0.000165447	4.31009e-11
439	1.62106e-05	0.000253681	1.57655e-11
440	2.0887e-05	3.31559e-05	1.40732e-12
441	7.45331e-06	0.00198837	2.33404e-08
442	3.43892e-05	0.00179449	8.735e-09
443	5.59959e-05	7.67685e-06	1.34337e-14
444	2.0887e-05	0.00119229	1.32827e-12
445	5.72084e-06	0.000127327	3.37508e-14
446	1.10372e-06	0.00215037	2.85327e-14
447	2.54433e-06	0.00478701	1.88405e-13
448	3.3425e-06	0.000597949	2.07794e-11
449	1.25464e-05	0.00116333	3.33285e-11
450	7.45331e-06	0.000807631	5.22027e-13
451	1.25464e-05	0.00026379	5.34017e-14
452	3.3425e-06	0.000412049	4.01808e-09
453	3.43892e-05	0.00109567	2.55682e-11
454	2.0887e-05	0.00174401	8.84507e-11
455	2.54433e-06	0.00802399	8.96161e-11
456	1.62106e-05	2.96314e-05	9.88098e-15
457	7.45331e-06	0.0033227	4.65987e-11
458	7.11571e-05	0.000945478	4.98193e-11
459	0.000180483	0.00159358	2.93765e-09
460	4.37892e-06	0.00263075	4.65987e-11
461	4.67e-07	0.0188022	8.36911e-10
462	1.62106e-05	0.00251298	6.32827e-15
463	0.000670925	6.57933e-05	7.64848e-11
464	3.3425e-06	5.66721e-06	2.88658e-15
465	2.68381e-05	0.000417886	7.01516e-11
466	9.68357e-06	0.00038593	3.85963e-10
467	3.43892e-05	6.6945e-05	2.22045e-15
468	1.46206e-06	0.00207436	7.62612e-13
469	2.68381e-05	7.17715e-05	1.44329e-15
470	0.000226196	1.49956e-05	1.08343e-10
471	1.25464e-05	0.00890344	1.33628e-09
472	9.01732e-05	1.57843e-05	4.81837e-13
473	1.10372e-06	0.00565912	8.03879e-11
474	1.25464e-05	0.000889622	5.44961e-10
475	2.54433e-06	0.00296632	1.24241e-09
476	5.72084e-06	1.21066e-05	3.3018e-13
477	1.46206e-06	0.00259227	2.0095e-14
478	4.37892e-06	0.00708871	1.24971e-09
479	1.62106e-05	0.000546341	5.14244e-09
480	4.37892e-06	0.000838584	7.79832e-12
481	7.45331e-06	0.000802775	1.09272e-10
482	2.68381e-05	0.000276238	1.50324e-13
483	5.72084e-06	0.00211787	1.75702e-09
484	5.59959e-05	6.86632e-05	1.18794e-14
485	2.68381e-05	0.00147481	7.01516e-11
486	5.59959e-05	0.000200568	2.96987e-09
487	1.62106e-05	0.000736653	3.04739e-09
488	2.54433e-06	0.00487879	1.21858e-12
489	3.43892e-05	5.63001e-06	2.44249e-14
490	1.62106e-05	0.00187383	8.02691e-14
491	2.0887e-05	0.0206276	3.80659e-08
492	9.68357e-06	0.00013113	1.57655e-11
493	0.000437933	0.00414201	2.27817e-09
494	9.68357e-06	0.000615738	2.16328e-11
495	3.43892e-05	0.000775858	4.56974e-09
496	0.000113955	0.000178966	3.81575e-10
497	7.45331e-06	0.000178742	3.95994e-12
498	1.62106e-05	0.0018735	9.06403e-07
499	1.25464e-05	0.0139346	7.35546e-10
500	2.0887e-05	0.0170969	2.07827e-09
501	7.11571e-05	0.000233446	2.17648e-12
502	7.45331e-06	0.00226334	5.78593e-12
503	1.25464e-05	0.00925822	7.82607e-08
504	0.022218	0.00596984	1.11121e-08
505	1.46206e-06	0.00348812	6.35658e-09
506	2.68381e-05	4.53784e-05	2.0095e-14
507	9.68357e-06	0.00014395	2.11331e-12
508	1.25464e-05	2.44794e-05	4.56302e-14
509	3.3425e-06	1.21992e-05	3.33588e-10
510	2.68381e-05	3.14636e-05	1.56541e-14
511	1.25464e-05	0.000215463	4.2899e-13
512	5.72084e-06	0.00526688	2.8554e-10
513	7.11571e-05	9.07601e-05	1.56097e-10
514	2.54433e-06	0.000116073	4.84635e-12
515	0.000113955	0.000725089	1.84744e-08
516	4.37892e-06	0.0007249	1.52635e-09
517	1.93139e-06	0.000143455	4.21885e-15
518	7.11571e-05	0.000107689	1.09246e-13
519	2.68381e-05	4.38695e-05	3.20044e-12
520	5.59959e-05	0.000188966	1.6559e-12
521	9.68357e-06	0.0154084	4.31009e-11
522	4.37892e-06	0.000204691	2.79126e-10
523	2.0887e-05	0.00192596	6.18262e-11
524	3.43892e-05	4.27484e-05	2.22045e-15
525	5.72084e-06	0.00145363	2.31105e-11
526	2.54433e-06	0.0268005	2.56899e-09
527	0.364332	0.484927	0.00572505
528	7.45331e-06	4.38032e-06	1.54811e-11
529	9.68357e-06	0.00537067	7.22079e-08
530	1	0.780154	0.780154
531	0.136885	0.103142	3.19782e-05
532	5.72084e-06	0.0136483	7.48401e-13
533	4.37892e-06	0.000783087	2.11331e-12
534	1.10372e-06	5.00064e-06	1.11022e-15
535	1.25464e-05	0.00314769	8.86818e-09
536	5.59959e-05	0.000659639	3.65763e-12
537	1.62106e-05	0.00124201	3.33067e-16
538	9.01732e-05	0.00021062	8.17348e-11
539	2.0887e-05	0.000807631	4.10016e-11
540	7.11571e-05	1.97215e-05	4.17062e-10
541	3.43892e-05	0.00108885	7.97015e-10
542	4.37892e-06	0.00433863	8.87452e-11
543	0.737334	0.576905	0.0222528
544	3.43892e-05	0.000134426	2.11331e-12
545	1.25464e-05	6.14133e-06	4.46809e-12
546	5.59959e-05	6.02461e-05	1.73357e-11
547	2.54433e-06	0.00528227	5.67805e-11
548	0.000143611	1.91204e-05	6.81799e-12
549	3.3425e-06	0.000200568	6.13132e-12
550	5.72084e-06	0.00288684	3.40841e-10
551	0.000282702	5.19052e-05	3.50719e-13
552	0.217792	0.504948	0.00300191
553	2.54433e-06	0.0118572	2.25834e-09
554	0.000113955	0.000720259	3.0046e-12
555	2.0887e-05	7.16067e-05	7.97584e-13
556	2.54433e-06	0.00228171	3.33285e-11
557	1.62106e-05	0.00026379	1.25641e-09
558	1.25464e-05	0.00334741	4.58933e-08
559	2.68381e-05	1.72813e-07	1.11022e-16
560	9.68357e-06	0.000588406	5.53224e-13
561	1.62106e-05	6.06419e-05	1.08813e-12
562	8.30898e-07	0.000305499	1.43703e-11
563	1.10372e-06	0.00200976	1.34337e-14
564	3.48656e-07	0.000350316	1.59004e-11
565	5.72084e-06	0.00119616	3.10529e-13
566	3.43892e-05	8.96838e-05	9.83658e-11
567	4.39431e-05	0.000933333	4.72867e-09
568	4.37892e-06	0.000587937	1.54965e-12
569	4.39431e-05	0.000607548	2.57572e-13
570	0.00101655	0.000337478	2.42517e-07
571	0.000282702	0.0016446	5.62395e-12
572	9.68357e-06	0.014328	2.44319e-10
573	1.25464e-05	0.000177561	9.45415e-11
574	2.0887e-05	0.000876934	3.50977e-11
575	1.25464e-05	0.00227005	1.07754e-07
576	3.3425e-06	0.00175009	2.62457e-13
577	2.0887e-05	0.00288684	2.63244e-11
578	1.62106e-05	4.06729e-06	2.86915e-12
579	9.01732e-05	0.000298957	3.475e-14
580	3.3425e-06	0.000435063	3.04201e-14
581	4.37892e-06	0.000847744	2.05191e-12
582	7.11571e-05	0.00034847	4.1012e-11
583	5.72084e-06	0.00711955	3.15165e-10
584	1.62106e-05	0.000127501	8.79747e-11
585	0.000143611	6.34581e-05	1.45006e-11
586	1.62106e-05	0.00300151	1.16821e-10
587	9.68357e-06	0.00436739	1.28342e-13
588	2.0887e-05	0.000985273	1.5341e-10
589	9.01732e-05	0.00034847	1.23954e-10
590	4.39431e-05	0.000159847	2.34497e-10
591	2.0887e-05	0.00422789	2.06613e-13
592	1.62106e-05	7.66943e-05	3.45057e-13
593	1.62106e-05	0.000118237	1.18787e-11
594	2.59582e-07	0.00205424	2.55682e-11
595	3.3425e-06	0.000211704	1.11452e-10
596	2.0887e-05	0.000196795	1.15463e-14
597	4.37892e-06	0.000859742	1.55242e-12
598	2.68381e-05	0.000405753	9.86555e-12
599	0.000282702	2.39962e-05	2.99667e-11
600	1.10372e-06	0.000245677	4.13003e-14
601	4.39431e-05	0.0019752	2.78877e-12
602	1.62106e-05	0.00054944	2.90931e-11
603	9.01732e-05	2.58689e-05	5.09592e-14
604	9.01732e-05	0.000106961	6.09103e-10
605	9.01732e-05	4.71814e-06	1.03584e-13
606	4.37892e-06	0.00490997	2.10955e-10
607	6.23784e-07	0.0377215	3.95279e-11
608	0.000226196	0.000360624	4.33834e-08
609	3.43892e-05	0.0019752	1.47509e-09
610	1.62106e-05	0.0134193	8.28834e-10
611	0.000113955	4.20813e-05	2.48757e-12
612	3.43892e-05	0.000144313	4.79353e-11
613	1.62106e-05	0.00760775	5.67731e-09
614	2.68381e-05	0.000432293	2.64011e-13
615	0.000143611	0.000120736	5.50633e-11
616	0.000542803	2.02551e-05	1.51972e-10
617	1.25464e-05	0.00061472	3.20041e-11
618	5.59959e-05	0.00030075	1.40343e-10
619	2.68381e-05	0.000191021	7.76089e-10
620	1.25464e-05	0.00770891	9.49995e-09
621	5.72084e-06	2.54697e-05	4.42835e-12
622	4.39431e-05	0.00640796	9.08562e-07
623	0.000542803	3.58456e-07	4.08773e-10
624	2.0887e-05	0.000343167	2.83397e-10
625	5.59959e-05	5.65888e-05	1.18944e-10
626	7.45331e-06	0.000516127	1.61982e-13
627	9.68357e-06	0.0127569	2.51017e-11
628	7.11571e-05	9.8154e-05	6.68561e-11
629	3.43892e-05	0.00011374	2.40608e-10
630	2.54433e-06	0.00569021	1.24236e-08
631	4.67e-07	0.010916	2.32655e-10
632	3.3425e-06	0.000207693	7.43849e-15
633	0.000113955	2.0639e-06	2.1867e-12
634	7.45331e-06	0.0178944	2.40372e-10
635	6.23784e-07	0.000662097	1.47493e-12
636	2.54433e-06	0.0112742	2.41649e-10
637	6.23784e-07	0.000723177	5.62039e-12
638	5.72084e-06	0.00653209	3.55893e-12
639	8.30898e-07	0.00115449	1.08358e-13
640	9.68357e-06	0.0118017	1.20283e-08
641	4.37892e-06	0.0023885	2.40139e-11
642	5.59959e-05	0.0370491	2.2146e-06
643	0.000226196	0.00314769	8.43123e-08
644	1.10372e-06	0.000211704	1.4988e-14
645	1.42699e-07	0.0176955	1.49882e-10
646	2.0887e-05	0.000378756	2.16527e-12
647	0.000143611	0.000964149	2.65007e-07
648	7.45331e-06	0.000360624	1.24236e-08
649	0.000282702	6.02115e-05	1.90332e-09
650	4.37892e-06	0.00148487	2.96346e-08
651	5.72084e-06	0.000839703	4.95284e-10
652	0.000143611	0.000156723	9.88098e-15
653	2.68381e-05	0.000128396	2.86327e-13
654	7.11571e-05	5.8105e-05	8.43448e-12
655	3.3425e-06	0.000310609	5.69544e-14
656	7.75805e-08	0.00215903	2.56387e-11
657	1.25464e-05	0.000783112	2.16318e-10
658	1.25464e-05	0.00150479	2.74295e-09
659	0.0012461	0.000802263	1.32813e-11
660	6.23784e-07	0.00188321	3.19257e-09
661	2.68381e-05	7.77582e-05	2.7903e-11
662	5.59959e-05	0.00119709	9.7158e-10
663	2.0887e-05	0.000180126	5.44561e-11
664	6.23784e-07	0.00630551	1.6035e-12
665	1.25464e-05	0.00281573	1.96917e-09
666	1.42699e-07	0.0157828	1.20373e-11
667	1.25464e-05	2.31265e-06	1.62037e-12
668	1.25464e-05	0.000577241	1.89504e-12
669	4.37892e-06	0.0784798	1.66287e-08
670	4.39431e-05	2.11408e-06	6.01645e-10
671	0.000670925	8.17299e-05	1.57655e-11
672	7.11571e-05	0.000162134	7.66054e-15
673	7.45331e-06	0.000113941	5.62039e-12
674	4.37892e-06	0.0203524	1.23312e-09
675	0.000143611	0.000286413	1.4099e-09
676	1.62106e-05	0.000804996	8.67184e-12
677	1.25464e-05	0.000502199	2.08311e-12
678	0.000180483	8.32945e-06	2.61279e-11
679	2.0887e-05	7.85755e-06	7.17007e-10
680	1.25464e-05	0.00156364	5.95723e-12
681	1.62106e-05	0.000132635	1.97509e-13
682	4.39431e-05	0.000729879	3.59157e-09
683	3.3425e-06	0.00261039	2.29272e-11
684	4.39431e-05	0.000477452	1.59823e-11
685	2.0887e-05	0.00032115	2.02973e-10
686	4.37892e-06	0.000759526	3.21965e-15
687	5.72084e-06	0.000392235	6.61582e-13
688	9.01732e-05	1.12804e-06	3.10141e-12
689	1.93139e-06	0.00984372	1.13058e-09
690	3.43892e-05	0.00360923	2.17826e-13
691	5.72084e-06	0.00319026	5.86373e-09
692	3.3425e-06	0.00189899	1.93623e-13
693	7.45331e-06	0.00440268	2.25582e-11
694	2.68381e-05	0.000237123	4.26081e-12
695	3.43892e-05	0.000127921	1.65268e-12
696	3.3425e-06	0.000975318	7.36333e-12
697	1.46206e-06	0.0755948	9.36971e-07
698	8.30898e-07	0.00223588	4.52091e-10
699	2.68381e-05	0.00925822	2.11185e-09
700	2.59582e-07	0.00341685	8.02691e-14
701	2.68381e-05	0.00147889	1.71902e-10
702	9.68357e-06	2.01536e-07	1.60982e-14
703	4.37892e-06	0.00105462	6.22213e-12
704	1.62106e-05	0.000487707	4.31009e-11
705	1.25464e-05	5.34754e-05	5.83378e-12
706	1.25464e-05	0.00017486	1.09912e-14
707	2.68381e-05	0.0315806	2.05191e-12
708	4.37892e-06	0.000388949	3.34599e-12
709	5.72084e-06	0.000163509	5.34017e-14
710	5.59959e-05	0.00162954	2.17271e-13
711	5.59959e-05	5.4559e-06	8.88178e-16
712	1.25464e-05	1.65888e-05	5.66214e-15
713	1.62106e-05	0.00789553	1.14068e-07
714	5.59959e-05	0.000975238	5.62395e-12
715	3.3425e-06	0.00107191	8.88178e-16
716	0.000282702	7.64216e-06	1.28009e-13
717	9.68357e-06	0.00119709	1.44329e-15
718	7.11571e-05	3.51694e-05	1.63258e-12
719	7.45331e-06	0.00140444	6.83009e-13
720	1.46206e-06	0.00100963	6.68561e-11
721	1.62106e-05	0.00205428	3.57103e-12
722	1.93139e-06	0.0017737	7.77156e-16
723	2.0887e-05	2.82908e-05	1.31229e-11
724	9.01732e-05	1.2111e-06	1.99698e-11
725	2.68381e-05	0.00053351	9.6454e-12
726	4.67e-07	0.000606177	1.80682e-10
727	4.37892e-06	0.000711209	4.70658e-11
728	7.45331e-06	4.01057e-05	1.1513e-13
729	5.59959e-05	4.33648e-05	1.22621e-11
730	4.39431e-05	0.00156879	6.63747e-12
731	0.000113955	0.000101293	1.77789e-11
732	2.0887e-05	0.00533463	2.38673e-09
733	7.11571e-05	0.000887154	3.31607e-10
734	7.45331e-06	0.000311117	8.57631e-09
735	5.59959e-05	0.0100284	8.37572e-09
736	7.45331e-06	0.00183163	1.03483e-09
737	2.68381e-05	0.000172494	4.91513e-11
738	1.25464e-05	0.000209202	5.7947e-12
739	4.39431e-05	0.000500643	1.822e-09
740	3.3425e-06	0.000223173	7.97584e-13
741	4.37892e-06	0.0376173	1.42675e-12
742	8.30898e-07	0.0127533	6.61582e-13
743	8.30898e-07	0.00382834	3.41195e-07
744	1.25464e-05	2.64338e-05	1.4988e-14
745	9.01732e-05	5.61224e-05	8.27893e-12
746	7.11571e-05	0.00255965	7.76162e-11
747	2.68381e-05	0.00101698	1.84678e-08
748	0.000542803	5.15378e-05	1.21196e-11
749	1.25464e-05	9.7026e-05	2.78877e-12
750	9.68357e-06	0.00869217	5.64377e-07
751	2.0887e-05	0.00034899	8.57631e-09
752	7.11571e-05	0.00332451	1.96447e-10
753	1.46206e-06	0.00120883	1.66533e-15
754	9.68357e-06	6.86632e-05	1.39666e-13
755	0.000113955	0.000141786	2.75783e-10
756	4.39431e-05	1.14944e-05	1.10232e-11
757	2.0887e-05	1.02788e-05	2.9976e-15
758	8.30898e-07	0.00200194	1.33227e-15
759	4.37892e-06	0.00108762	2.40139e-11
760	5.59959e-05	0.0235699	1.16393e-05
761	5.72084e-06	0.00451383	1.80966e-14
762	1.62106e-05	0.000807631	1.77789e-11
763	5.72084e-06	0.000145599	1.70941e-12
764	1.46206e-06	0.00076922	2.80886e-14
765	4.39431e-05	3.14862e-05	1.23327e-11
766	5.72084e-06	0.0217393	4.34542e-08
767	9.68357e-06	0.0111029	1.96917e-09
768	1.10372e-06	0.00161698	1.30035e-09
769	1.25464e-05	0.00259977	7.68266e-10
770	5.72084e-06	0.000668632	7.47752e-10
771	4.39431e-05	2.5138e-05	1.90011e-11
772	2.68381e-05	8.35452e-07	1.90958e-14
773	0.000226196	0.000225176	1.97117e-11
774	0.000226196	0.0293094	9.24221e-10
775	1.25464e-05	0.00398702	6.57918e-13
776	3.43892e-05	0.000223397	3.60762e-10
777	1.62106e-05	0.00053351	1.02287e-08
778	1.93139e-06	0.000510682	2.78877e-12
779	0.000143611	1.38798e-05	3.55648e-10
780	9.68357e-06	0.000647415	1.3279e-10
781	6.23784e-07	9.08085e-05	1.70364e-12
782	3.3425e-06	0.000111049	7.8524e-10
783	0.000113955	0.000189167	4.46021e-10
784	1.62106e-05	0.000143865	6.18262e-11
785	1.25464e-05	0.000245677	1.39454e-11
786	1.93139e-06	0.00458808	1.83786e-12
787	4.39431e-05	0.000563237	7.19391e-12
788	1.10372e-06	0.00811319	3.95279e-11
789	0.000226196	0.00154331	7.53605e-09
790	0.000113955	0.00391312	2.29474e-10
791	5.72084e-06	0.00875217	1.23327e-11
792	3.3425e-06	0.00790112	7.44482e-11
793	0.000143611	0.00595313	3.58505e-09
794	4.39431e-05	0.0014955	2.14583e-11
795	2.0887e-05	3.9112e-06	2.5091e-14
796	1.62106e-05	0.000211267	3.41138e-12
797	7.11571e-05	0.00029526	6.56172e-11
798	1.25464e-05	0.000310917	7.86271e-12
799	5.59959e-05	0.000204255	1.74542e-10
800	2.0887e-05	0.000173109	4.56761e-11
801	5.72084e-06	1.70439e-05	1.65201e-13
802	0.000226196	0.000280496	3.17701e-12
803	4.39431e-05	0.000164448	2.18392e-12
804	3.3425e-06	0.00578702	5.67805e-11
805	4.39431e-05	2.38083e-06	9.03821e-12
806	2.54433e-06	0.00417045	2.22101e-10
807	0.000113955	0.00012487	2.13571e-10
808	2.54433e-06	8.41276e-06	6.90559e-14
809	1.62106e-05	0.00407332	1.06521e-10
810	0.000143611	0.00638445	2.14583e-11
811	9.01732e-05	0.000105706	4.37721e-09
812	0.000180483	0.00211271	4.60934e-10
813	2.0887e-05	2.87905e-06	0
814	4.39431e-05	0.000237066	4.97485e-10
815	3.3425e-06	6.06387e-06	1.11022e-16
816	9.68357e-06	0.000839703	1.52767e-10
817	2.0887e-05	0.000254457	3.62377e-13
818	5.72084e-06	0.00287291	4.90608e-13
819	3.43892e-05	0.000783087	3.56745e-11
820	2.0887e-05	1.92536e-05	8.41738e-12
821	3.48656e-07	0.00382007	9.91152e-12
822	2.0887e-05	7.31821e-05	8.13128e-09
823	9.68357e-06	0.000294857	8.88933e-12
824	1.62106e-05	0.000851184	1.33153e-10
825	1.62106e-05	1.30315e-05	1.5222e-11
826	2.68381e-05	1.39597e-05	1.3872e-10
827	9.68357e-06	0.00124201	9.91152e-12
828	2.59582e-07	0.0043319	4.33531e-12
829	2.68381e-05	0.00333287	7.92338e-09
830	3.43892e-05	0.000326473	9.06186e-12
831	2.54433e-06	0.00103852	1.57763e-13
832	2.68381e-05	0.00139699	4.95284e-10
833	0.000143611	6.85767e-07	4.21885e-15
834	1.93139e-06	4.03013e-05	2.9976e-15
835	1.62106e-05	0.00417045	3.18848e-08
836	5.59959e-05	3.16437e-06	2.96352e-12
837	1.62106e-05	0.000215811	3.89078e-12
838	7.11571e-05	1.71742e-05	6.6257e-12
839	7.45331e-06	0.00196729	3.15165e-10
840	2.68381e-05	0.000178742	7.04992e-14
841	1.46206e-06	0.00119616	3.60762e-10
842	1.46206e-06	4.77313e-05	2.22045e-16
843	1.25464e-05	0.00021062	1.97117e-11
844	1.10372e-06	0.00393157	5.92859e-14
845	2.68381e-05	0.000197042	3.04761e-10
846	1.46206e-06	0.00831867	3.71546e-11
847	7.11571e-05	0.000532971	1.51962e-11
848	7.11571e-05	8.38859e-05	5.15477e-13
849	2.0887e-05	1.63996e-05	6.50591e-14
850	0.000352346	1.6829e-05	1.37922e-08
851	1.9273e-07	0.00367728	3.14415e-13
852	2.54433e-06	0.0623671	2.90135e-12
853	4.37892e-06	6.64462e-05	1.20776e-11
854	0.000226196	3.68335e-05	1.05449e-12
855	1.25464e-05	0.00518538	1.5489e-09
856	2.68381e-05	0.000120942	2.02766e-11
857	1.93139e-06	0.000889622	7.59282e-13
858	4.37892e-06	0.000403661	1.66521e-10
859	9.68357e-06	6.38603e-05	4.79353e-11
860	8.30898e-07	0.0207429	2.18806e-09
861	2.68381e-05	0.000249528	8.40439e-14
862	1.93139e-06	0.000446422	1.79967e-13
863	1.25464e-05	2.26016e-05	1.7597e-13
864	1.93139e-06	0.0260381	8.997e-09
865	3.3425e-06	0.0198505	1.22318e-09
866	4.39431e-05	5.34802e-05	9.06053e-13
867	2.54433e-06	0.0012554	6.61349e-12
868	1.25464e-05	0.0113759	2.68341e-13
869	5.72084e-06	0.00259227	4.58522e-14
870	2.68381e-05	0.000888412	1.55431e-15
871	0.000180483	0.00851799	2.62184e-08
872	0.000226196	5.26994e-06	1.94844e-13
873	2.0887e-05	0.00348279	1.11452e-10
874	2.0887e-05	0.000862537	1.11688e-13
875	3.43892e-05	0.000254457	3.24996e-10
876	9.01732e-05	0.00108902	1.66533e-14
877	0.000113955	0.000453805	5.92859e-14
878	5.72084e-06	0.000739427	1.74542e-10
879	9.01732e-05	1.6845e-05	1.66916e-11
880	3.3425e-06	0.0219719	1.89443e-08
881	1.25464e-05	0.00299909	2.21326e-10
882	3.43892e-05	8.41276e-06	6.90559e-14
883	0.000180483	2.43584e-05	3.55893e-12
884	7.45331e-06	0.00550434	1.73089e-07
885	0.000826995	0.000516586	1.44795e-08
886	1.25464e-05	0.000979506	1.08343e-10
887	1.62106e-05	0.00160297	1.55269e-11
888	2.0887e-05	0.000683227	2.6598e-08
889	9.01732e-05	0.00108885	1.17661e-12
890	2.68381e-05	0.00519527	5.27831e-08
891	1.25464e-05	0.000129614	2.49911e-13
892	0.000670925	0.000625182	5.83547e-09
893	5.72084e-06	0.000594782	2.04436e-12
894	2.0887e-05	9.61121e-05	2.22045e-16
895	5.59959e-05	8.87638e-05	1.33587e-10
896	1.46206e-06	0.000505684	3.37508e-14
897	3.48656e-07	0.000244162	2.22045e-16
898	5.72084e-06	0.00347605	1.00985e-09
899	0.000352346	0.00010175	5.97324e-10
900	3.3425e-06	0.00253266	7.58249e-12
901	4.37892e-06	0.00110561	3.15115e-09
902	1.25464e-05	0.0287935	1.74827e-11
903	1.9273e-07	0.00812662	2.41474e-13
904	1.46206e-06	0.000350316	6.46705e-13
905	5.59959e-05	1.82151e-06	2.08722e-14
906	5.72084e-06	0.00694484	6.18262e-11
907	1.25464e-05	0.00561053	3.3206e-09
908	1.93139e-06	0.00250508	1.84974e-12
909	2.0887e-05	1.80036e-05	2.31704e-13
910	4.37892e-06	0.00215903	1.11452e-10
911	2.0887e-05	0.00956406	2.70517e-12
912	1.62106e-05	0.000484621	8.43448e-12
913	5.59959e-05	0.000175253	1.80272e-09
914	7.45331e-06	0.0184103	4.33834e-08
915	2.68381e-05	7.21097e-05	4.43534e-13
916	1.62106e-05	0.000653394	1.34343e-08
917	4.37892e-06	0.0205971	1.10232e-11
918	9.68357e-06	0.000578879	1.96447e-10
919	6.23784e-07	0.0024569	9.96045e-10
920	3.3425e-06	0.00366622	8.21565e-15
921	1.46206e-06	7.51078e-05	4.0169e-11
922	2.54433e-06	0.0017675	2.21601e-13
923	2.68381e-05	0.032863	1.03272e-09
924	1.25464e-05	0.0334885	2.93297e-10
925	1.62106e-05	0.00217488	9.44689e-13
926	9.68357e-06	0.00221473	2.83397e-10
927	0.000143611	0.000899419	2.1318e-10
928	4.39431e-05	0.000266877	8.84507e-11
929	2.68381e-05	0.000507832	4.44089e-16
930	1.62106e-05	0.000212649	2.22489e-12
931	1.25464e-05	4.20989e-05	0
932	1.25464e-05	0.000833389	2.17328e-11
933	6.23784e-07	7.60543e-05	3.32956e-12
934	2.68381e-05	0.0104229	8.81005e-08
935	1.62106e-05	1.90148e-05	6.90559e-14
936	1.62106e-05	0.00596991	6.51333e-09
937	0.000113955	8.32945e-06	5.92859e-14
938	1.25464e-05	0.00389627	7.46947e-12
939	0.000352346	4.56039e-05	1.33658e-10
940	1.62106e-05	0.000143455	1.82294e-11
941	2.68381e-05	0.00239819	8.7374e-11
942	7.45331e-06	0.00750683	1.12166e-12
943	9.01732e-05	2.31741e-05	1.32783e-13
944	9.01732e-05	0.000190417	2.68341e-13
945	5.72084e-06	8.96838e-05	1.12166e-12
946	1.10372e-06	0.00207113	1.79589e-10
947	1.25464e-05	8.56525e-05	5.53224e-13
948	2.68381e-05	0.0144537	1.99699e-10
949	4.37892e-06	0.000536325	4.0806e-11
950	7.45331e-06	0.0230766	4.04255e-10
951	2.0887e-05	0.000536042	1.36093e-09
952	5.72084e-06	0.00578702	8.40532e-10
953	2.54433e-06	0.00162728	6.78498e-10
954	2.54433e-06	0.0066888	3.75255e-14
955	7.45331e-06	0.00398702	1.10729e-11
956	0.000113955	3.73707e-05	1.84797e-12
957	2.54433e-06	3.68335e-05	6.32516e-12
958	3.3425e-06	0.000103595	3.55893e-12
959	4.37892e-06	0.000114087	1.05758e-11
960	7.11571e-05	9.61121e-05	7.61391e-12
961	7.45331e-06	9.50929e-05	7.75857e-12
962	7.45331e-06	0.00214747	6.747e-11
963	4.37892e-06	0.00644019	8.84507e-11
964	1.25464e-05	0.000978944	1.88131e-11
965	3.48656e-07	0.00555155	1.59823e-11
966	5.59959e-05	0.000366497	1.14514e-11
967	5.59959e-05	0.00596991	4.34583e-10
968	1.25464e-05	0.000118844	2.83304e-10
969	7.45331e-06	0.00113996	1.00241e-08
970	5.59959e-05	2.14216e-05	8.52651e-14
971	2.54433e-06	0.00711711	4.98193e-11
972	2.54433e-06	0.00100687	2.59792e-14
973	9.68357e-06	0.00613647	5.50633e-11
974	0.000180483	0.00293187	1.40696e-07
975	0.000143611	0.000304556	2.65787e-11
976	4.39431e-05	0.00797674	4.18101e-09
977	1.46206e-06	0.000331527	3.20044e-12
978	9.68357e-06	1.6845e-05	8.02691e-14
979	3.43892e-05	9.61121e-05	3.16969e-13
980	3.3425e-06	0.00215903	5.9186e-13
981	4.39431e-05	0.000294117	2.1867e-12
982	9.01732e-05	2.27104e-07	1.09912e-14
983	0.999232	0.217335	0.447519
984	7.45331e-06	0.00237892	1.08984e-09
985	8.30898e-07	1.08244e-06	1.11022e-16
986	2.68381e-05	0.000121689	8.43769e-15
987	2.68381e-05	0.00715315	6.13493e-10
988	1.62106e-05	0.000701206	4.31472e-11
989	5.72084e-06	5.34754e-05	0
990	9.68357e-06	2.77552e-05	3.43287e-11
991	3.3425e-06	0.020474	1.15193e-09
992	0.000352346	0.000218527	1.07304e-11
993	2.0887e-05	0.00263075	6.87594e-11
994	8.30898e-07	0.00454192	1.71447e-11
995	4.67e-07	5.32769e-05	0
996	4.67e-07	8.24351e-05	3.45279e-14
997	4.39431e-05	0.000624657	3.50557e-10
998	0.000143611	1.06316e-06	1.20348e-13
999	2.68381e-05	0.00156481	8.10122e-09
1000	7.45331e-06	0.000723742	1.62853e-10
