# Supplementary material for: Human influence on the distribution of cacao: insights from remote sensing and biogeography
Source: Springer Nature journal article supplement (doi:10.1007/s10531-023-02777-7), 2024-02-10
Supplement: MOESM1 [file 26722336 › Supplementary/AppendixS2 - Kstests/AppendixS2-C.xlsx]

## Sheet: TableS2-A. Median NDVI
Median NDVI	Africa	Guianan Lowlands province	Mesoamerica	ImerÌ province	South American Atlantic coast	Madeira province	Pacific dominion	Eurasia	Ucayali province	Paramo province	Cauca province	North America	Antilles	Napo province	Puntarenas-ChiriquÌ province	RondÙnia province	Par· province	Oceania and Pacific islands	Magdalena province	Roraima province	Xingu-TapajÛs province
Africa	1	0.00460094	0.118045	2.58586e-09	0.00358551	1.10946e-07	0.000115301	0.640838	1.43608e-05	0.865057	0.0431476	0.0443443	0.00182068	5.01586e-06	0.000207455	3.95199e-09	0.00274471	0.000338474	0.0295807	0.00353666	0.00353666
Guianan Lowlands province	0.00460094	1	0.0520814	0.0850436	0.0425702	0.076088	0.00264754	0.111007	0.125505	0.0740656	0.00148801	0.00881853	0.000324208	0.242106	0.000807276	0.0289608	0.0442452	0.00126778	0.0601648	0.258083	0.258083
Mesoamerica	0.118045	0.0520814	1	0	0.000100063	1.09318e-11	5.63083e-09	0.212801	3.38564e-07	0.50226	0.00376698	0.000181962	9.13358e-05	1.76407e-11	9.46487e-10	0	0.00206444	1.14681e-06	0.425065	0.0012856	0.00315498
ImerÌ province	2.58586e-09	0.0850436	0	1	2.33147e-15	0.0355497	2.24265e-14	3.04541e-05	0.0944948	0.00102546	1.31284e-12	9.17436e-09	2.13491e-11	0.0137787	1.11022e-16	2.71759e-09	9.38233e-08	1.68586e-08	1.49325e-13	0.451246	0.451246
South American Atlantic coast	0.00358551	0.0425702	0.000100063	2.33147e-15	1	2.34512e-10	1.76915e-08	0.00296574	1.42419e-07	0.0164391	0.000427764	5.05347e-06	2.49185e-07	1.07447e-09	1.35182e-09	0	0.00162456	1.85641e-06	0.242204	0.000263501	0.00417248
Madeira province	1.10946e-07	0.076088	1.09318e-11	0.0355497	2.34512e-10	1	3.43554e-11	0.000203371	0.779015	0.00185692	8.17896e-10	1.95386e-08	1.36347e-09	0.14286	2.14582e-11	0.00572381	1.33957e-05	1.77384e-07	7.34555e-11	0.936645	0.0787339
Pacific dominion	0.000115301	0.00264754	5.63083e-09	2.24265e-14	1.76915e-08	3.43554e-11	1	0.00903102	6.73037e-07	0.460803	0.356947	0.144496	0.00138423	3.84503e-10	0.0299128	6.55032e-15	1.15541e-06	0.0245546	4.61784e-05	0.00037713	0.00119692
Eurasia	0.640838	0.111007	0.212801	3.04541e-05	0.00296574	0.000203371	0.00903102	1	0.000112484	0.935454	0.344892	0.00569832	0.00823753	0.000916275	0.000718728	3.45198e-07	0.00285591	0.000810566	0.115677	0.021806	0.0286737
Ucayali province	1.43608e-05	0.125505	3.38564e-07	0.0944948	1.42419e-07	0.779015	6.73037e-07	0.000112484	1	0.0041765	6.89151e-07	1.11097e-05	5.11648e-06	0.212824	2.49001e-07	0.0944948	0.00101701	4.87059e-05	3.5812e-07	0.89458	0.180216
Paramo province	0.865057	0.0740656	0.50226	0.00102546	0.0164391	0.00185692	0.460803	0.935454	0.0041765	1	0.773878	0.267265	0.0661401	0.0056572	0.142709	0.00102546	0.00693652	0.063427	0.181536	0.0452866	0.0452866
Cauca province	0.0431476	0.00148801	0.00376698	1.31284e-12	0.000427764	8.17896e-10	0.356947	0.344892	6.89151e-07	0.773878	1	0.244463	0.000702126	3.40848e-08	0.0648362	2.44038e-12	0.00351435	0.00333553	0.00636603	0.000749231	0.000749231
North America	0.0443443	0.00881853	0.000181962	9.17436e-09	5.05347e-06	1.95386e-08	0.144496	0.00569832	1.11097e-05	0.267265	0.244463	1	0.138535	2.72562e-07	0.459752	3.27286e-10	2.60146e-05	0.0442452	0.00012414	0.000670925	0.00306762
Antilles	0.00182068	0.000324208	9.13358e-05	2.13491e-11	2.49185e-07	1.36347e-09	0.00138423	0.00823753	5.11648e-06	0.0661401	0.000702126	0.138535	1	8.2795e-08	0.0502005	5.53992e-10	1.65844e-06	0.301328	9.58858e-05	0.000982018	0.000982018
Napo province	5.01586e-06	0.242106	1.76407e-11	0.0137787	1.07447e-09	0.14286	3.84503e-10	0.000916275	0.212824	0.0056572	3.40848e-08	2.72562e-07	8.2795e-08	1	8.32279e-10	3.56496e-05	6.45072e-05	8.4642e-07	8.71648e-10	0.541886	0.154538
Puntarenas-ChiriquÌ province	0.000207455	0.000807276	9.46487e-10	1.11022e-16	1.35182e-09	2.14582e-11	0.0299128	0.000718728	2.49001e-07	0.142709	0.0648362	0.459752	0.0502005	8.32279e-10	1	5.14033e-14	1.89709e-07	0.0151452	2.22515e-06	0.000433182	0.000433182
RondÙnia province	3.95199e-09	0.0289608	0	2.71759e-09	0	0.00572381	6.55032e-15	3.45198e-07	0.0944948	0.00102546	2.44038e-12	3.27286e-10	5.53992e-10	3.56496e-05	5.14033e-14	1	3.23919e-06	3.11688e-08	3.13083e-14	0.144732	0.0111183
Par· province	0.00274471	0.0442452	0.00206444	9.38233e-08	0.00162456	1.33957e-05	1.15541e-06	0.00285591	0.00101701	0.00693652	0.00351435	2.60146e-05	1.65844e-06	6.45072e-05	1.89709e-07	3.23919e-06	1	5.46837e-06	0.12161	0.011952	0.022218
Oceania and Pacific islands	0.000338474	0.00126778	1.14681e-06	1.68586e-08	1.85641e-06	1.77384e-07	0.0245546	0.000810566	4.87059e-05	0.063427	0.00333553	0.0442452	0.301328	8.4642e-07	0.0151452	3.11688e-08	5.46837e-06	1	2.87895e-05	0.0020666	0.0020666
Magdalena province	0.0295807	0.0601648	0.425065	1.49325e-13	0.242204	7.34555e-11	4.61784e-05	0.115677	3.5812e-07	0.181536	0.00636603	0.00012414	9.58858e-05	8.71648e-10	2.22515e-06	3.13083e-14	0.12161	2.87895e-05	1	0.000298609	0.00180974
Roraima province	0.00353666	0.258083	0.0012856	0.451246	0.000263501	0.936645	0.00037713	0.021806	0.89458	0.0452866	0.000749231	0.000670925	0.000982018	0.541886	0.000433182	0.144732	0.011952	0.0020666	0.000298609	1	0.818621
Xingu-TapajÛs province	0.00353666	0.258083	0.00315498	0.451246	0.00417248	0.0787339	0.00119692	0.0286737	0.180216	0.0452866	0.000749231	0.00306762	0.000982018	0.154538	0.000433182	0.0111183	0.022218	0.0020666	0.00180974	0.818621	1

## Sheet: TableS2-B. Rel. Freq. Forested
Rel. Freq. Forested	Africa	Guianan Lowlands province	Mesoamerica	ImerÌ province	South American Atlantic coast	Madeira province	Pacific dominion	Eurasia	Ucayali province	Paramo province	Cauca province	North America	Antilles	Napo province	Puntarenas-ChiriquÌ province	RondÙnia province	Par· province	Oceania and Pacific islands	Magdalena province	Roraima province	Xingu-TapajÛs province
Africa	1	0.0678571	0.0172526	5.19593e-06	0.0071135	8.95384e-05	0.384305	0.406315	0.00078887	0.44868	0.0311584	0.00582586	0.0218658	1.0512e-05	0.0427657	1.81777e-05	0.0103578	0.00911711	0.0108126	0.0491436	0.0491436
Guianan Lowlands province	0.0678571	1	0.0364112	0.0776751	0.116987	0.127115	0.0170508	0.0144877	0.174785	0.423416	0.55956	8.59259e-05	8.01306e-05	0.108331	4.66182e-05	0.11403	0.00657226	0.000100349	0.425175	0.274321	0.549327
Mesoamerica	0.0172526	0.0364112	1	1.9873e-14	0.000162206	5.921e-08	0.0212843	0.278942	1.35051e-05	0.689056	0.0333935	1.27392e-06	4.19695e-05	1.19654e-11	1.78714e-05	2.7256e-12	0.000975388	2.92594e-06	0.00579773	0.0242657	0.0362312
ImerÌ province	5.19593e-06	0.0776751	1.9873e-14	1	0	0.410663	6.2117e-13	4.42172e-08	0.169637	0.029434	8.86394e-06	5.04485e-13	2.13491e-11	0.197812	1.11022e-16	0.375211	2.44375e-06	1.68586e-08	4.95368e-07	0.506373	0.399474
South American Atlantic coast	0.0071135	0.116987	0.000162206	0	1	7.60103e-12	3.61865e-05	0.00415543	3.06358e-08	0.183306	0.00210325	1.14578e-07	8.94156e-08	5.55112e-16	1.53321e-11	0	0.000761058	2.80156e-06	0.000186003	0.000331829	0.00505253
Madeira province	8.95384e-05	0.127115	5.921e-08	0.410663	7.60103e-12	1	6.72553e-10	9.34739e-06	0.0103662	0.0371581	9.67062e-05	2.58209e-10	1.36347e-09	0.0660843	5.83977e-13	0.0819205	3.24332e-05	1.77384e-07	8.94054e-05	0.992959	0.455098
Pacific dominion	0.384305	0.0170508	0.0212843	6.2117e-13	3.61865e-05	6.72553e-10	1	0.3088	2.84918e-07	0.404804	0.00012014	0.00617743	0.00971772	7.64822e-12	0.0260596	1.37876e-11	0.0022933	0.00873525	5.59815e-05	0.00092395	0.00172904
Eurasia	0.406315	0.0144877	0.278942	4.42172e-08	0.00415543	9.34739e-06	0.3088	1	7.06259e-06	0.21247	0.0124106	0.00157711	0.00823753	1.27398e-06	0.139361	1.25528e-07	0.0010918	0.000810566	0.0113326	0.00487861	0.0142314
Ucayali province	0.00078887	0.174785	1.35051e-05	0.169637	3.06358e-08	0.0103662	2.84918e-07	7.06259e-06	1	0.0640519	0.00111675	2.86815e-07	1.17801e-06	0.0308732	4.77707e-08	0.102143	0.000237447	1.33563e-05	0.000152106	0.19245	0.708493
Paramo province	0.44868	0.423416	0.689056	0.029434	0.183306	0.0371581	0.404804	0.21247	0.0640519	1	0.180983	0.0280569	0.0148932	0.0331452	0.116352	0.0354302	0.380573	0.0056646	0.302821	0.164079	0.164079
Cauca province	0.0311584	0.55956	0.0333935	8.86394e-06	0.00210325	9.67062e-05	0.00012014	0.0124106	0.00111675	0.180983	1	3.43715e-05	1.77885e-05	1.48315e-05	1.02321e-06	4.66182e-05	0.0123467	3.15713e-05	0.0467743	0.0354302	0.0354302
North America	0.00582586	8.59259e-05	1.27392e-06	5.04485e-13	1.14578e-07	2.58209e-10	0.00617743	0.00157711	2.86815e-07	0.0280569	3.43715e-05	1	0.304784	4.21618e-12	0.00191523	8.94262e-12	2.79164e-07	0.707368	1.4948e-06	0.000670925	0.000670925
Antilles	0.0218658	8.01306e-05	4.19695e-05	2.13491e-11	8.94156e-08	1.36347e-09	0.00971772	0.00823753	1.17801e-06	0.0148932	1.77885e-05	0.304784	1	2.01668e-10	0.00346719	1.11849e-10	4.68041e-07	0.268986	8.78635e-07	0.000982018	0.000982018
Napo province	1.0512e-05	0.108331	1.19654e-11	0.197812	5.55112e-16	0.0660843	7.64822e-12	1.27398e-06	0.0308732	0.0331452	1.48315e-05	4.21618e-12	2.01668e-10	1	1.44329e-14	0.238064	1.0512e-05	5.85721e-08	2.20083e-06	0.442801	0.153572
Puntarenas-ChiriquÌ province	0.0427657	4.66182e-05	1.78714e-05	1.11022e-16	1.53321e-11	5.83977e-13	0.0260596	0.139361	4.77707e-08	0.116352	1.02321e-06	0.00191523	0.00346719	1.44329e-14	1	1.55431e-15	4.43993e-08	0.00356356	4.16247e-08	0.000433182	0.000433182
RondÙnia province	1.81777e-05	0.11403	2.7256e-12	0.375211	0	0.0819205	1.37876e-11	1.25528e-07	0.102143	0.0354302	4.66182e-05	8.94262e-12	1.11849e-10	0.238064	1.55431e-15	1	5.19593e-06	3.11688e-08	2.45358e-06	0.307371	0.307371
Par· province	0.0103578	0.00657226	0.000975388	2.44375e-06	0.000761058	3.24332e-05	0.0022933	0.0010918	0.000237447	0.380573	0.0123467	2.79164e-07	4.68041e-07	1.0512e-05	4.43993e-08	5.19593e-06	1	1.77771e-06	0.00393241	0.0271847	0.0271847
Oceania and Pacific islands	0.00911711	0.000100349	2.92594e-06	1.68586e-08	2.80156e-06	1.77384e-07	0.00873525	0.000810566	1.33563e-05	0.0056646	3.15713e-05	0.707368	0.268986	5.85721e-08	0.00356356	3.11688e-08	1.77771e-06	1	4.34764e-06	0.0020666	0.0020666
Magdalena province	0.0108126	0.425175	0.00579773	4.95368e-07	0.000186003	8.94054e-05	5.59815e-05	0.0113326	0.000152106	0.302821	0.0467743	1.4948e-06	8.78635e-07	2.20083e-06	4.16247e-08	2.45358e-06	0.00393241	4.34764e-06	1	0.234259	0.044317
Roraima province	0.0491436	0.274321	0.0242657	0.506373	0.000331829	0.992959	0.00092395	0.00487861	0.19245	0.164079	0.0354302	0.000670925	0.000982018	0.442801	0.000433182	0.307371	0.0271847	0.0020666	0.234259	1	0.329116
Xingu-TapajÛs province	0.0491436	0.549327	0.0362312	0.399474	0.00505253	0.455098	0.00172904	0.0142314	0.708493	0.164079	0.0354302	0.000670925	0.000982018	0.153572	0.000433182	0.307371	0.0271847	0.0020666	0.044317	0.329116	1

## Sheet: TableS2-C. Rel. Freq. Anthropiz
Rel. Freq. Anthropized	Africa	Guianan Lowlands province	Mesoamerica	ImerÌ province	South American Atlantic coast	Madeira province	Pacific dominion	Eurasia	Ucayali province	Paramo province	Cauca province	North America	Antilles	Napo province	Puntarenas-ChiriquÌ province	RondÙnia province	Par· province	Oceania and Pacific islands	Magdalena province	Roraima province	Xingu-TapajÛs province
Africa	1	0.00263616	0.00283036	4.69396e-06	0.00358551	0.000331896	0.0931934	0.0396129	0.00240603	0.962466	0.0491462	0.376652	0.0618172	0.000139117	0.00195121	3.02139e-05	6.62124e-05	0.0116591	0.0824994	0.0271847	0.0271847
Guianan Lowlands province	0.00263616	1	0.316893	0.458063	0.0507753	0.903656	0.0170508	0.00509138	0.499586	0.0887151	0.00149317	0.0229183	0.627167	0.459258	0.212503	0.712269	0.00724408	0.363866	0.309717	0.990716	0.811159
Mesoamerica	0.00283036	0.316893	1	0.00205628	1.99024e-05	0.266885	0.0953045	0.00420062	0.262868	0.274083	0.000559087	0.0600493	0.34629	0.0128367	0.304989	0.101202	0.00597046	0.0239807	0.075479	0.525234	0.141835
ImerÌ province	4.69396e-06	0.458063	0.00205628	1	3.91896e-08	0.445964	0.00114187	0.000250581	0.0745832	0.0424705	4.9629e-06	0.00459929	0.247359	0.00664614	0.00144293	0.375211	0.00123049	0.303454	0.00032949	0.800473	0.399474
South American Atlantic coast	0.00358551	0.0507753	1.99024e-05	3.91896e-08	1	0.000532009	0.315597	0.034822	0.00211205	0.164379	0.000573732	0.0691279	0.0229155	0.000447823	0.0493032	1.32507e-05	0.0290052	0.00097768	0.00416628	0.105294	0.0603349
Madeira province	0.000331896	0.903656	0.266885	0.445964	0.000532009	1	0.00971541	0.00808868	0.638189	0.130109	9.67062e-05	0.0126188	0.698968	0.393915	0.179014	0.826486	0.0117644	0.139932	0.0837557	0.761463	0.360853
Pacific dominion	0.0931934	0.0170508	0.0953045	0.00114187	0.315597	0.00971541	1	0.460368	0.018555	0.546601	0.0096559	0.392734	0.209378	0.006536	0.022958	0.026506	0.0101372	0.0058271	0.108901	0.0995618	0.0658601
Eurasia	0.0396129	0.00509138	0.00420062	0.000250581	0.034822	0.00808868	0.460368	1	0.00588582	0.554124	0.00141896	0.120114	0.0270007	0.000960626	0.0233388	0.00343741	0.000816684	0.00284595	0.0251623	0.0425477	0.0547633
Ucayali province	0.00240603	0.499586	0.262868	0.0745832	0.00211205	0.638189	0.018555	0.00588582	1	0.0640519	0.00111675	0.0113118	0.153364	0.110933	0.0744169	0.305837	0.00391106	0.0895981	0.174422	0.917218	0.345587
Paramo province	0.962466	0.0887151	0.274083	0.0424705	0.164379	0.130109	0.546601	0.554124	0.0640519	1	0.451892	0.509458	0.263381	0.0430871	0.0828837	0.084106	0.0485938	0.0393943	0.207083	0.164079	0.11631
Cauca province	0.0491462	0.00149317	0.000559087	4.9629e-06	0.000573732	9.67062e-05	0.0096559	0.00141896	0.00111675	0.451892	1	0.244463	0.00649346	3.21175e-05	0.000173885	2.71667e-05	4.3783e-05	0.00154127	0.0134759	0.0164595	0.0164595
North America	0.376652	0.0229183	0.0600493	0.00459929	0.0691279	0.0126188	0.392734	0.120114	0.0113118	0.509458	0.244463	1	0.226257	0.00864205	0.0139612	0.0109416	0.00616145	0.0204665	0.105716	0.0680922	0.0680922
Antilles	0.0618172	0.627167	0.34629	0.247359	0.0229155	0.698968	0.209378	0.0270007	0.153364	0.263381	0.00649346	0.226257	1	0.29504	0.313995	0.593539	0.0259986	0.478515	0.0108429	0.850857	0.850857
Napo province	0.000139117	0.459258	0.0128367	0.00664614	0.000447823	0.393915	0.006536	0.000960626	0.110933	0.0430871	3.21175e-05	0.00864205	0.29504	1	0.0757572	0.167476	0.00830433	0.0807386	0.00270954	0.693612	0.761452
Puntarenas-ChiriquÌ province	0.00195121	0.212503	0.304989	0.00144293	0.0493032	0.179014	0.022958	0.0233388	0.0744169	0.0828837	0.000173885	0.0139612	0.313995	0.0757572	1	0.100597	0.0851031	0.0151452	0.136294	0.282071	0.169552
RondÙnia province	3.02139e-05	0.712269	0.101202	0.375211	1.32507e-05	0.826486	0.026506	0.00343741	0.305837	0.084106	2.71667e-05	0.0109416	0.593539	0.167476	0.100597	1	0.00493334	0.303454	0.000607078	0.743715	0.684268
Par· province	6.62124e-05	0.00724408	0.00597046	0.00123049	0.0290052	0.0117644	0.0101372	0.000816684	0.00391106	0.0485938	4.3783e-05	0.00616145	0.0259986	0.00830433	0.0851031	0.00493334	1	0.0116591	0.0586606	0.12771	0.12771
Oceania and Pacific islands	0.0116591	0.363866	0.0239807	0.303454	0.00097768	0.139932	0.0058271	0.00284595	0.0895981	0.0393943	0.00154127	0.0204665	0.478515	0.0807386	0.0151452	0.303454	0.0116591	1	0.0166356	0.529507	0.4764
Magdalena province	0.0824994	0.309717	0.075479	0.00032949	0.00416628	0.0837557	0.108901	0.0251623	0.174422	0.207083	0.0134759	0.105716	0.0108429	0.00270954	0.136294	0.000607078	0.0586606	0.0166356	1	0.499206	0.234259
Roraima province	0.0271847	0.990716	0.525234	0.800473	0.105294	0.761463	0.0995618	0.0425477	0.917218	0.164079	0.0164595	0.0680922	0.850857	0.693612	0.282071	0.743715	0.12771	0.529507	0.499206	1	0.818621
Xingu-TapajÛs province	0.0271847	0.811159	0.141835	0.399474	0.0603349	0.360853	0.0658601	0.0547633	0.345587	0.11631	0.0164595	0.0680922	0.850857	0.761452	0.169552	0.684268	0.12771	0.4764	0.234259	0.818621	1
