# Supplementary material for: Human influence on the distribution of cacao: insights from remote sensing and biogeography
Source: Springer Nature journal article supplement (doi:10.1007/s10531-023-02777-7), 2024-02-10
Supplement: MOESM1 [file 26722336 › Supplementary/AppendixS2 - Kstests/AppendixS2-D.xlsx]

## Sheet: TableS1-All records
empirical (cacao with wild Theobroma relatives)	median_NDVI	relative_freq_forests	relative_freq_disturbed_areas
1	0	0	0

## Sheet: TableS2-Median NDVI - groups
Median NDVI	p-value
Africa	2.78724e-08
Andes	0.101695
Antilles	2.41321e-11
Cauca province	5.23936e-12
Guianan Lowlands province	0.0735085
ImerÌ province	0.0218224
Madeira province	0.177074
Magdalena province	1.13792e-11
Mesoamerica	1.83964e-13
Napo province	0.0016106
North America	1.55264e-09
Pacific dominion	9.65894e-15
Pantepui province	0.275354
Par· province	1.04233e-05
Paramo province	0.000582973
Puntarenas-ChiriquÌ province	0
RondÙnia province	0.00149978
Roraima province	0.28975
South American Atlantic coast	1.36668e-13
Ucayali province	0.203155
Xingu-TapajÛs province	0.223519

## Sheet: TableS3-Freq Forests - groups
Relative Frequency of Forested Areas	p-value
Africa	2.00244e-06
Andes	0.0338983
Antilles	0
Cauca province	2.3971e-06
Guianan Lowlands province	0.0252242
ImerÌ province	0.184136
Madeira province	0.0516406
Magdalena province	2.20906e-06
Mesoamerica	1.86073e-13
Napo province	0.172226
North America	0
Pacific dominion	0
Pantepui province	0.674576
Par· province	3.39939e-07
Paramo province	0.0139931
Puntarenas-ChiriquÌ province	0
RondÙnia province	0.791172
Roraima province	0.173994
South American Atlantic coast	1.25788e-13
Ucayali province	0.0283842
Xingu-TapajÛs province	0.135914

## Sheet: TableS4-Freq Disturbed - groups
Relative Frequency of Forested Areas	p-value
Africa	0.000246583
Andes	0.0338983
Antilles	0.000282805
Cauca province	0.000493163
Guianan Lowlands province	4.50735e-06
ImerÌ province	1.90958e-14
Madeira province	4.30902e-10
Magdalena province	1.57667e-05
Mesoamerica	8.36697e-12
Napo province	7.54952e-15
North America	0.0179907
Pacific dominion	0.000102421
Pantepui province	0.60339
Par· province	8.2943e-11
Paramo province	0.0279468
Puntarenas-ChiriquÌ province	7.28623e-10
RondÙnia province	2.80886e-14
Roraima province	0.00019107
South American Atlantic coast	1.29508e-12
Ucayali province	1.88656e-07
Xingu-TapajÛs province	0.00019107
