# Supplementary material for: Human influence on the distribution of cacao: insights from remote sensing and biogeography
Source: Springer Nature journal article supplement (doi:10.1007/s10531-023-02777-7), 2024-02-10
Supplement: MOESM1 [file 26722336 › Supplementary/README.txt]

======
==== READ ME ====

LEGENDS 

SUPPLEMENTARY FILES FOR THE MANUSCRIPT


APPENDIX S1. List of occurrences of preserved specimen collections considered for this study, including the empirical data ("empirical_occs.txt") and the 1,000 replicates generated for this study ("rep_occs_<I>.txt", with I varying from 1:1000, representing each replicate). The databases include NDVI values recovered for the image satellites downloaded. TIF images of the satellite searches are available upon request, as well as scripts used for the analyses of this study. Databases also include voucher information of each preserved specimen collection downloaded from GBIF. See Methods (section 2.1.) for details on the obtention of this data.

APPENDIX S2. P-values for the Ks.tests performed for this study, including:
	APPENDIX S2-A. P-values of the Ks.tests performed between all values of the empirical database versus each replicate. 
	APPENDIX S2-B. P-values among each replicate and the empirical data for each minor area (defined in section 2.1. of the main file, Methods) considered for this study, pairwise-compared and for each variable 	(median NDVI, relative frequency of dense forests, relative frequency of areas under human influence).
	APPENDIX S2-C. P-values of each minor area (defined in section 2.1. of the main file, Methods) considered of this study, pairwise-compared, empirical data only.
	APPENDIX S2-D. P-values for all values and each minor area, when comparing Theobroma cacao data with records from other wild relatives of Theobroma.


For more details please consult the authors of this work.

Matheus Colli-Silva (matheus.colli.silva@alumni.usp.br)
